# Supplementary material for: Analysis of the transcriptome and metabolome of pancreatic spheroids derived from human induced pluripotent stem cells and matured in an organ-on-a-chip
Source: Royal Society of Chemistry journal article supplement (doi:10.1039/d2mo00132b), 2022-07-12
Supplement: d2mo00132b3.xlsx [file d2mo00132b3.xlsx]

## Sheet: TFs
Sample	BIOCHIP_MONO_rep1	BIOCHIP_MONO_rep2	BIOCHIP_MONO_rep3	BIOCHIP_MONO_rep4	BIOCHIP_MONO_rep5	BIOCHIP_MONO_rep6	PETRI_3D_rep1	PETRI_3D_rep2	PETRI_3D_rep4	PETRI_3D_rep6	iPSC_CONTROL_rep2	iPSC_CONTROL_rep1
Label	3D-Biochip	3D-Biochip	3D-Biochip	3D-Biochip	3D-Biochip	3D-Biochip	3D-Petri	3D-Petri	3D-Petri	3D-Petri	Stage1-iPSC	Stage1-iPSC
AAAGUGC	-0.014326	0.014947	0.009812	-0.016820	-0.023788	0.022609	0.049266	0.003849	0.008291	-0.014596	-0.023320	-0.015925
AACACUG	-0.005911	0.006506	0.005611	0.006126	-0.019533	-0.005168	-0.004167	-0.005881	0.006878	-0.010146	0.029631	-0.003947
AACAGUC	-0.000256	-0.011941	0.015140	-0.002912	-0.010427	0.004124	0.001031	0.005958	-0.009889	-0.016093	0.005739	0.019527
AACCGUU	0.001000	0.000117	0.000759	-0.000270	0.000403	-0.000054	0.000225	-0.000052	-0.001092	-0.000879	-0.000569	0.000412
AACCUGG	0.001053	0.000311	0.000260	-0.002093	0.001286	0.001492	-0.001150	-0.001133	0.001474	-0.002119	-0.000915	0.001536
AACGGAA	-0.002914	-0.002192	0.002720	0.002150	0.000505	0.000923	-0.002337	-0.001392	0.002076	-0.001357	0.004913	-0.003096
AAGGCAC	0.014825	-0.040318	0.006648	0.022430	-0.016192	0.033664	-0.002013	0.029206	-0.037536	-0.005415	-0.010575	0.005275
AAGGUGC	-0.000464	-0.007929	0.002221	0.004015	0.005281	0.006622	0.001032	-0.010400	-0.000246	0.000736	0.000948	-0.001817
AAGUGCU	0.006063	0.013612	0.003687	0.007881	-0.034186	0.012385	0.034647	-0.005570	-0.013060	-0.017298	-0.001124	-0.007037
AAUACUG	0.032117	-0.025048	0.010029	0.003139	0.001824	-0.020587	-0.012778	0.028746	-0.017533	-0.012302	0.018018	-0.005626
AAUCUCA	0.007195	0.002422	0.001122	-0.000541	0.001168	-0.000578	-0.002767	0.000783	-0.003308	-0.002450	-0.002610	-0.000438
AAUCUCU	0.004869	0.000275	-0.001240	-0.003575	-0.000859	-0.003767	0.002409	0.001525	-0.000557	0.001272	0.000916	-0.001267
AAUGCCC	0.006031	0.004441	0.009033	-0.007298	-0.009393	-0.003823	-0.000165	-0.004195	0.001250	-0.000403	0.003411	0.001111
ACAGUAC	0.015309	-0.005320	-0.014839	0.024034	-0.020413	-0.007730	-0.029145	0.007685	0.013190	-0.010356	0.029697	-0.002113
ACAGUAU	0.013664	-0.006113	0.006080	-0.008871	0.003626	-0.020170	-0.043587	0.017967	-0.001730	-0.001733	0.021752	0.019116
ACAUUCA	0.010577	-0.004154	-0.020038	0.040058	-0.002475	0.007011	-0.002351	0.013176	0.022542	-0.026585	-0.016668	-0.021094
ACCACAG	-0.005678	0.002662	-0.008217	0.003575	-0.005393	0.004293	0.006440	0.000379	-0.001769	-0.003575	0.001843	0.005439
ACCCGUA	-0.000205	-0.000266	0.000911	0.000129	-0.001147	0.000017	0.002145	-0.000432	-0.000434	-0.001359	0.000195	0.000448
ACCCUGU	-0.000362	0.000453	0.004601	-0.010195	-0.003580	-0.000658	0.005206	-0.001066	0.000912	-0.009468	0.002609	0.011547
ACUGCAU	0.006007	0.006061	0.003328	-0.000018	-0.001576	0.004266	-0.007098	-0.014548	-0.002826	-0.010412	0.005182	0.011633
ACUGGCC	0.002882	-0.001547	-0.004425	-0.005377	0.000410	-0.003993	0.008263	-0.004483	-0.005818	0.001132	0.000318	0.012638
AGAUCAG	-0.000028	-0.000678	-0.000177	0.000024	-0.000624	-0.001313	-0.000242	0.000278	0.000129	0.001155	0.000557	0.000919
AGCACCA	-0.012897	-0.011713	0.029471	0.010272	-0.009264	-0.015950	-0.010281	-0.018282	0.000176	-0.004942	0.026510	0.016901
AGCAGCA	0.007551	-0.010055	0.011028	-0.013216	-0.018772	-0.009848	0.025659	0.001163	0.007493	0.010563	0.003470	-0.015037
AGCAGCG	0.015141	0.008318	0.000888	-0.006837	-0.025026	0.004137	0.002222	0.012254	0.011709	0.011758	-0.006731	-0.027835
AGCCCUU	0.008408	0.000301	0.010687	-0.000652	-0.021633	0.006931	-0.010196	-0.005393	0.007526	0.002083	0.013910	-0.011972
AGCUGCC	0.013023	0.014700	-0.016336	-0.002520	-0.005472	-0.017695	0.021128	0.015704	-0.013694	-0.017316	-0.000765	0.009242
AGCUUAU	-0.001231	-0.022103	-0.000801	0.002984	0.011259	0.004457	0.005272	-0.015157	-0.009010	0.005274	0.015088	0.003967
AGGUAGU	0.008303	-0.009906	-0.002726	0.000724	-0.021497	-0.011466	0.004875	0.013109	-0.015020	0.010904	0.009075	0.013624
AGUGCAA	-0.012726	-0.015853	0.030658	0.001699	-0.003690	0.006322	0.007945	0.003246	0.001754	0.023462	-0.023514	-0.019303
AGUGCUU	0.012306	0.008047	0.005898	0.007138	-0.009548	-0.001448	0.003472	-0.005771	-0.000846	0.003491	-0.008389	-0.014349
AGUGGUU	-0.000957	-0.001375	0.011011	0.006548	0.002565	0.009375	-0.010610	0.008504	-0.013536	-0.010235	-0.004322	0.003031
AHR_ARNT2	-0.006636	-0.056649	-0.016352	0.020102	0.040008	-0.059659	-0.033640	-0.000349	0.067482	0.015714	0.015720	0.014258
AIRE	-0.019815	0.018913	0.008656	0.008545	0.001069	-0.002714	0.001137	-0.002459	0.010890	-0.016206	-0.003264	-0.004754
ALX1_ARX	-0.013715	-0.006609	-0.005265	-0.007384	-0.007262	-0.002745	0.002983	-0.001820	0.009500	-0.001695	0.017781	0.016232
ALX3	0.013750	-0.014523	0.007493	0.002970	-0.007544	0.002043	-0.004745	-0.001104	-0.007818	0.001999	0.004371	0.003109
ARID3A	0.003429	-0.018512	0.002995	0.009609	-0.016514	0.004957	0.012258	0.013126	-0.019817	-0.009200	0.006016	0.011653
ARID5A	-0.012534	-0.006344	0.006700	0.015418	0.009625	0.000192	0.001654	0.021609	-0.018537	0.010182	-0.009390	-0.018575
ARID5B	-0.011640	0.009307	-0.014654	0.023080	0.010180	-0.015521	-0.004629	0.000334	0.007670	0.000168	-0.001820	-0.002476
ARNT	-0.011966	0.016814	0.034048	0.045838	-0.033420	-0.003305	-0.029007	0.026662	0.029194	-0.028449	-0.002830	-0.043578
AR_NR3C2	-0.011050	-0.009672	0.000946	-0.004942	-0.002114	0.011818	0.000065	0.011723	0.006037	0.001034	-0.002117	-0.001729
ATF2_ATF1_ATF3	0.008889	0.013164	-0.000816	-0.020880	0.063354	0.064259	-0.040848	0.006275	-0.042407	0.025106	-0.037515	-0.038582
ATF4	0.008544	0.001012	0.008194	0.018512	-0.011041	-0.007096	-0.018063	-0.008528	0.006539	0.006162	0.000551	-0.004786
ATF5	-0.011872	-0.002028	0.012956	-0.023489	0.002716	0.008954	-0.008229	-0.002198	0.021331	-0.009716	0.015119	-0.003543
ATF6	0.019554	0.012050	-0.005717	0.008858	-0.004964	-0.028358	-0.034770	0.000352	0.004150	0.011283	0.000666	0.016895
ATF7	0.027652	-0.020787	-0.015088	0.018791	-0.008300	0.027946	0.010448	0.011274	-0.000981	-0.002880	-0.016264	-0.031811
AUAAAGU	-0.000849	-0.010866	-0.011262	-0.002068	0.012584	0.006647	-0.002979	0.014108	-0.019983	0.006525	0.001823	0.006321
AUGACAC	0.001277	0.000534	-0.000373	0.000085	0.000209	0.000524	-0.002015	-0.000880	-0.002123	0.000049	0.002071	0.000641
AUGGCAC	0.022905	0.015143	0.005392	0.002208	-0.005622	0.010220	-0.024006	0.005252	-0.013367	-0.010719	-0.003760	-0.003644
AUGGCUU	0.004006	-0.013164	-0.003690	-0.007671	-0.002024	-0.008999	-0.013860	0.006344	0.018629	-0.025659	0.048429	-0.002341
AUGUGCC	0.005368	-0.009099	-0.002813	-0.001698	0.010987	-0.003071	0.001066	-0.000724	-0.001549	-0.004242	0.001503	0.004272
AUUGCAC	-0.021955	0.007168	-0.000393	-0.007096	0.005648	-0.003140	-0.000446	0.018202	0.029456	-0.004955	-0.005694	-0.016794
BACH1_NFE2_NFE2L2	-0.009123	0.025124	-0.021856	0.023377	0.022778	0.023971	0.008516	0.018474	-0.017742	0.001385	-0.048030	-0.026873
BACH2	-0.022907	0.037691	-0.015723	0.031938	-0.011852	-0.013946	-0.006474	0.008452	-0.005115	0.018879	-0.025217	0.004275
BARHL1	-0.040670	0.003418	0.037713	0.059377	-0.055001	0.047963	-0.014496	0.025768	0.025331	0.010311	-0.068759	-0.030954
BARHL2	0.022206	0.007461	-0.013638	0.014593	-0.026250	-0.014767	-0.033321	0.012958	-0.012042	0.028054	0.002641	0.012104
BARX1	-0.020354	0.013693	0.016886	0.011880	-0.017107	0.004221	0.045654	-0.017876	0.023936	-0.005822	-0.054681	-0.000429
BATF	-0.038744	0.018733	0.027068	0.015101	0.020530	-0.001264	0.032493	-0.021099	-0.022588	0.016141	-0.031847	-0.014523
BATF3	-0.006904	0.001064	0.000404	0.012057	0.003911	0.010946	-0.007536	0.001105	0.009469	-0.009862	-0.012908	-0.001745
BBX	0.000338	-0.002391	-0.002707	-0.001523	0.011856	-0.004695	0.001626	0.006819	-0.009053	0.005700	-0.003733	-0.002238
BCL6B	-0.013516	-0.005291	-0.010951	-0.001232	-0.015594	0.031077	0.003095	0.011423	0.009307	-0.009664	0.007284	-0.005939
BHLHE22_BHLHA15_BHLHE23	0.007928	-0.004923	-0.003907	-0.005338	0.000747	-0.010323	0.002872	0.008520	-0.004359	0.002811	-0.008156	0.014128
BHLHE40	0.019278	-0.002721	-0.002616	-0.001207	0.004442	-0.016970	0.007134	-0.015735	-0.001963	-0.005485	0.029083	-0.013240
BPTF	0.056910	0.008525	0.027883	-0.046664	-0.025640	-0.000649	-0.019711	-0.011361	-0.022277	0.003067	-0.014686	0.044603
BRCA1	-0.018389	-0.006138	0.002856	-0.008699	0.019807	-0.006950	-0.004424	0.002110	0.016199	0.008337	-0.008983	0.004274
CACAGUG	0.024572	-0.024055	0.008377	0.001476	0.016970	-0.019606	-0.037647	0.004882	-0.006994	0.002089	0.007943	0.021993
CACCUCC	0.000641	-0.000426	0.000295	-0.000807	-0.002536	-0.000369	-0.000891	0.001029	-0.001036	0.002630	-0.000987	0.002457
CAGUAGU	-0.001761	0.003276	-0.008320	0.024321	0.001512	-0.026420	-0.010073	0.002867	-0.004508	-0.000337	0.009842	0.009601
CAGUCCA	0.003288	-0.002599	-0.006254	-0.002465	-0.006577	-0.000215	0.005314	0.006792	-0.007679	0.007221	-0.001167	0.004342
CAGUGCA	0.004778	-0.010434	0.018444	0.010568	-0.014405	0.003600	-0.015524	0.011762	0.001298	0.013279	-0.006778	-0.016588
CBFB	0.002908	0.001695	0.006172	0.005793	-0.001690	-0.002911	0.005120	-0.001453	-0.001253	-0.002105	-0.005079	-0.007197
CCACAGG	0.004281	0.000828	0.001116	-0.000929	0.001052	-0.001529	0.002267	0.008053	0.001030	-0.009109	-0.005533	-0.001527
CCAGCAU	-0.002914	0.003111	0.000124	-0.006013	0.001221	-0.008674	0.001451	-0.003762	0.003449	-0.002613	0.010645	0.003974
CCAGUGU	-0.003079	0.007419	0.007820	0.004943	-0.019395	-0.003745	0.009146	0.013556	0.005145	-0.019147	-0.006147	0.003483
CCCUGAG	0.022675	-0.012088	0.019062	0.024545	-0.007275	-0.018860	-0.013659	-0.007766	-0.009265	-0.010935	-0.004025	0.017591
CCUUCAU	0.004014	0.002441	0.000577	-0.007332	0.003849	-0.010454	-0.003690	-0.002006	-0.004704	0.013989	-0.004220	0.007537
CCUUGGC	0.000871	-0.003025	-0.005368	0.002069	-0.001677	-0.000794	0.000695	0.001147	0.000270	0.000044	0.003595	0.002174
CDC5L	-0.008658	0.017692	-0.011820	0.009018	0.000875	0.015090	0.014784	-0.009218	-0.037447	-0.017009	0.005433	0.021260
CDX1	-0.031541	0.011263	-0.001167	-0.014995	-0.019117	0.035592	0.014573	-0.009564	0.006342	0.007499	0.018798	-0.017682
CDX2	-0.019598	-0.008530	0.008235	0.004835	-0.026089	-0.009917	0.026246	0.004446	0.011420	0.009611	0.006550	-0.007207
CEBPA	-0.037344	0.018383	0.009107	0.003033	-0.012929	-0.003244	0.000670	0.012340	-0.001117	-0.021284	0.033260	-0.000873
CEBPB	0.002741	-0.012209	0.004752	-0.007890	-0.001955	0.001755	-0.004347	0.011250	-0.006998	0.004687	0.018499	-0.010287
CEBPE_CEBPD	0.004958	-0.015550	0.001040	0.000536	0.008169	-0.035777	0.002571	0.006559	0.008841	-0.003556	-0.002974	0.025183
CEBPG	-0.004791	-0.018140	0.007125	0.012492	0.007852	-0.001162	0.014888	0.005432	-0.004520	-0.010391	-0.002840	-0.005945
CENPB	-0.007520	-0.009090	-0.001847	-0.000575	0.014138	-0.015195	-0.006158	0.011948	0.014178	-0.007403	0.007432	0.000092
CGUACCG	0.001638	-0.000176	-0.001553	0.002382	0.000182	0.000363	-0.003701	0.002600	-0.000809	0.000049	0.000292	-0.001268
CGUGUCU	0.000906	-0.000122	0.000404	0.000182	0.000694	0.000045	-0.000600	-0.000469	-0.001638	-0.000092	0.000448	0.000241
CLOCK	0.013647	0.003742	-0.005208	0.017130	-0.023969	0.005681	-0.001631	-0.027901	-0.015635	0.012210	0.015583	0.006351
CPEB1	0.011807	0.028185	-0.006272	-0.034152	-0.003592	0.007718	0.010993	-0.020534	0.013704	-0.009287	-0.002552	0.003981
CREB1	-0.015945	-0.008855	-0.047566	0.035203	0.022691	0.002909	-0.021407	0.023619	0.022175	-0.014230	-0.035956	0.037360
CREB3L1_CREB3	0.045033	0.012928	-0.000002	0.001727	-0.022156	-0.036297	-0.034422	0.036064	-0.002395	0.029204	-0.030515	0.000830
CREB3L2	0.002761	0.012218	0.003213	0.019375	-0.006685	-0.007775	0.008490	0.013648	-0.002136	-0.024086	-0.011345	-0.007679
CREB5_CREM_JUNB	0.026528	0.016934	-0.006482	0.020720	-0.012390	0.011038	-0.031584	0.022524	0.010450	0.006034	-0.025346	-0.038426
CTCF_CTCFL	-0.011033	0.006965	-0.019071	-0.022663	0.031425	-0.003358	-0.037322	-0.014439	0.027193	0.029857	-0.013889	0.026336
CUACAGU	-0.001541	0.002721	-0.002398	0.000753	-0.000110	-0.001107	-0.005430	0.006585	-0.000228	0.000149	0.004483	-0.003877
CUGGCUG	0.000857	0.004575	0.009693	-0.005357	-0.003667	-0.009787	-0.000596	0.003697	-0.004369	-0.001324	-0.003014	0.009292
CUUUGGU	0.014230	0.004937	0.003543	-0.004591	0.015418	-0.034779	0.005214	-0.000573	-0.031001	0.022467	-0.000062	0.005198
CUX1	-0.000152	-0.013484	-0.003531	-0.014422	0.023336	0.002148	0.018034	0.011158	-0.018524	-0.013626	-0.016419	0.025484
CUX2	-0.020741	-0.001477	-0.006934	-0.007362	-0.022319	0.025457	-0.010702	0.007045	-0.009879	0.008077	0.011928	0.026907
CXXC1	-0.064686	0.035101	0.055300	0.022394	-0.003979	-0.046442	-0.022918	0.010159	-0.003525	-0.004454	0.020513	0.002537
DBP	-0.010533	-0.014366	-0.000893	0.008983	-0.000721	-0.020685	0.015733	0.023219	-0.018805	0.004182	0.007791	0.006096
DBX2_HLX	-0.021868	-0.000670	-0.007496	-0.003442	-0.011502	-0.008394	0.017864	0.004286	-0.004340	0.016303	-0.009585	0.028845
DDIT3	0.014001	0.009484	0.004036	0.010711	-0.002578	-0.002787	-0.007295	-0.008670	-0.000532	-0.011452	0.001426	-0.006343
DLX1_HOXA3_BARX2	0.028218	-0.009740	-0.017044	-0.001561	0.006632	-0.009109	-0.013060	0.002093	-0.015714	-0.000058	0.021878	0.007464
DLX3_EVX1_MEOX1	0.012155	0.011450	-0.012604	-0.003244	0.011616	-0.018952	0.004860	0.001766	0.004622	-0.005915	0.008721	-0.014475
DLX4_HOXD8	0.010671	-0.037572	-0.043947	0.041872	-0.002291	0.019947	0.041410	-0.004940	-0.022582	0.032250	-0.020846	-0.013971
DLX5	-0.001186	0.015362	-0.007123	0.008292	0.002393	0.000977	-0.010107	0.009869	-0.012852	-0.006148	-0.002449	0.002973
DMBX1	0.010377	0.011924	-0.000754	-0.008090	-0.003050	-0.002623	-0.004244	-0.002599	-0.010016	0.012125	0.002438	-0.005488
DMC1	0.004619	0.005751	-0.006977	-0.006997	0.006175	-0.004653	-0.001127	0.007854	0.003422	-0.007833	0.001547	-0.001782
DPRX	-0.010147	0.004032	0.001285	-0.016292	-0.031862	0.043154	0.000374	0.004423	0.020114	0.001929	-0.002338	-0.014673
DRGX_PROP1	-0.024987	-0.011117	0.006976	0.008417	0.001295	-0.011900	-0.003789	-0.004792	0.008324	0.000637	0.018671	0.012264
DUXA	-0.003412	0.017139	0.001638	0.000920	-0.016013	0.002069	0.006156	-0.002682	-0.002713	-0.039596	0.051267	-0.014773
E2F2_E2F5	-0.012044	-0.018949	-0.028099	0.003371	-0.028476	-0.013688	0.034574	0.031617	-0.010099	-0.001769	0.016585	0.026976
E2F3	0.005730	-0.005924	0.003285	0.050476	0.018081	-0.007823	0.024788	-0.014190	-0.022173	-0.014036	-0.008470	-0.029745
E2F4	-0.045474	0.004436	0.016329	-0.002355	0.003920	-0.001162	0.004423	0.016276	-0.027409	0.003250	0.030003	-0.002238
E2F6	-0.007089	0.017299	0.007669	0.007021	0.007763	-0.048127	0.001489	0.014331	-0.028930	-0.027193	0.050989	0.004777
E2F7_E2F1	-0.007525	0.017163	-0.022737	-0.027109	0.038343	-0.007209	0.018493	0.010799	-0.006766	0.003462	-0.043690	0.026776
E2F8	-0.031478	-0.012032	0.051427	0.020320	0.001627	0.005658	0.017081	-0.008737	-0.009081	0.000182	-0.039016	0.004049
E4F1	0.027957	0.008254	-0.002996	-0.013078	-0.010499	0.009197	0.012447	0.000382	-0.018803	0.012553	-0.020014	-0.005400
EBF1	-0.003867	-0.027244	0.023611	-0.019963	-0.009235	-0.030319	0.056139	-0.013862	0.034243	-0.008384	-0.016578	0.015458
EBF3	0.012706	0.012099	0.000878	0.004922	-0.002953	0.005409	-0.013307	-0.012598	0.010919	-0.015930	0.000468	-0.002611
EGR1_EGR4	-0.021495	-0.058291	0.003729	0.020491	0.007812	0.003909	0.010969	0.050569	-0.001474	-0.012955	0.003475	-0.006739
EGR3_EGR2	-0.027799	-0.051206	0.015712	-0.021080	-0.012710	0.017266	-0.001916	0.026049	0.023824	0.003141	0.042198	-0.013480
ELF2_GABPA_ELF5	0.015540	0.002107	-0.016830	-0.004278	-0.026501	0.013480	-0.002009	-0.025909	-0.030394	-0.003334	0.046779	0.031347
ELF3_EHF	-0.028454	0.024589	0.031343	-0.022812	-0.010686	-0.033576	0.043774	-0.017676	0.014192	-0.007436	0.011877	-0.005135
ELK4_ETV5_ELK1_ELK3_ELF4	0.025181	0.024090	-0.015695	0.000264	-0.000154	-0.015377	-0.013683	0.010904	-0.020418	-0.002617	-0.027353	0.034859
EMX1	0.002757	0.008200	-0.001686	-0.002974	0.003416	-0.026394	0.005507	-0.009212	0.013802	0.017020	0.011312	-0.021748
EMX2	0.011788	0.005762	0.010690	0.021663	-0.011768	-0.009927	-0.006042	-0.007570	-0.016940	-0.010324	0.006612	0.006057
EN1_ESX1_GBX1	0.012691	0.003072	-0.021593	0.021258	0.024104	-0.027008	-0.019995	-0.006424	-0.021344	0.004385	0.028323	0.002532
EN2_GBX2_LBX2	0.008696	0.001730	-0.029451	0.008013	0.009034	-0.009210	-0.002681	0.003977	0.002974	0.011064	0.000613	-0.004760
EOMES	0.035491	-0.024566	0.002184	-0.009507	-0.013838	-0.051111	0.025913	-0.021619	0.027984	0.013953	0.004269	0.010848
EP300	0.021308	-0.008715	0.006003	-0.039214	-0.009303	-0.011948	0.026153	-0.004219	0.032053	0.006467	-0.009529	-0.009055
EPAS1_BCL3	0.002266	-0.026981	-0.020604	-0.017230	0.018227	0.032245	-0.009141	0.007826	-0.023476	-0.019940	0.033692	0.023115
ERG	0.007207	0.023922	-0.026030	-0.007409	0.016591	0.037694	0.016471	0.001757	0.002803	-0.035657	-0.026195	-0.011154
ESR1	0.003953	-0.011397	-0.031713	-0.010863	-0.004022	0.033241	-0.017438	-0.021329	0.018557	0.050633	0.005007	-0.014628
ESRRA_ESR2	0.049336	0.005361	-0.020497	0.033055	-0.028935	0.016668	0.009191	-0.011272	0.000841	-0.045384	-0.006239	-0.002127
ESRRB_ESRRG	-0.001676	-0.004692	-0.023573	0.036593	-0.035208	0.032881	-0.011586	0.015550	0.029205	-0.016211	-0.003107	-0.018174
ETS1	0.053710	0.022266	-0.021388	-0.036641	0.025127	0.011444	-0.000764	-0.023832	0.016524	0.032881	-0.042716	-0.036612
ETV1_ERF_FEV_ELF1	-0.025325	-0.015790	0.006308	0.009056	0.005820	0.050557	-0.061417	-0.015679	0.037190	-0.004289	-0.035249	0.048818
ETV2	0.003997	-0.066741	-0.014269	0.024947	0.009682	-0.013641	0.012274	0.011188	0.003029	-0.002375	0.000217	0.031693
ETV3	-0.012445	-0.023591	-0.022907	0.007256	0.004994	0.016852	-0.017070	0.007653	0.031199	0.006761	0.010205	-0.008907
ETV4_ETS2	-0.030890	0.005086	0.044366	0.018208	-0.017116	-0.011088	-0.026141	-0.009839	0.039153	-0.010111	-0.011209	0.009583
ETV6	-0.028237	0.037684	-0.001498	0.028091	-0.008410	-0.003088	-0.019737	-0.017939	0.001980	0.020099	0.011225	-0.020169
ETV7	-0.032990	-0.006120	0.001928	-0.004219	0.003142	0.015114	0.011129	-0.004440	0.009674	-0.015851	-0.015621	0.038254
EVX2	0.010731	-0.002959	0.001934	-0.008150	0.008354	-0.002080	0.000209	-0.006969	-0.002027	0.000142	0.002945	-0.002129
EZH2	0.007297	-0.004254	-0.004156	0.023188	-0.002649	-0.016190	-0.019009	-0.002928	0.000120	-0.006269	0.026482	-0.001632
FIGLA	0.010575	0.006009	-0.008579	0.007594	-0.005983	-0.002874	-0.006890	-0.009826	0.011682	0.021213	0.004869	-0.027790
FLI1	0.006807	-0.028150	-0.051446	0.019079	0.005483	-0.008454	0.019591	-0.025233	0.039512	0.026490	0.005335	-0.009013
FOSB	-0.007528	-0.012630	-0.008819	0.010904	0.014728	-0.017555	0.004359	0.002347	0.023134	0.001695	-0.009275	-0.001359
FOSL1	0.001487	0.017239	-0.018980	-0.001274	-0.002302	0.001244	0.005664	0.023158	0.017517	0.011461	-0.018254	-0.036959
FOSL2_SMARCC1	0.002008	0.033912	-0.036861	0.023815	0.005753	-0.030068	-0.005923	0.048888	0.007838	0.011056	-0.050688	-0.009731
FOXA1	-0.010933	-0.014294	0.002311	0.005683	0.008790	-0.007220	-0.005392	0.017375	0.007485	-0.006243	0.008035	-0.005598
FOXA2_FOXJ3	0.004419	-0.001316	0.032136	0.013093	-0.015551	0.010339	-0.009098	-0.005530	-0.010895	0.020890	-0.008170	-0.030317
FOXA3_FOXC2	-0.012183	0.001719	-0.002664	0.009085	-0.010960	-0.008263	0.013546	-0.007122	0.015608	0.018901	-0.000757	-0.016911
FOXC1	-0.004226	-0.008661	-0.001987	0.001784	-0.024358	-0.004686	0.013553	0.007968	0.007860	0.016762	-0.011471	0.007462
FOXD1_FOXO1_FOXO6_FOXG1_FOXP1	-0.037605	-0.016854	-0.000322	0.051004	-0.002249	0.005569	0.017378	0.028050	-0.003130	-0.021940	0.001802	-0.021704
FOXD3_FOXI1_FOXF1	-0.005371	-0.009507	-0.016047	0.010333	-0.004092	-0.013100	0.002297	0.031258	-0.003352	0.013520	-0.009342	0.003402
FOXF2_FOXJ1	-0.013011	0.013267	-0.011467	-0.003962	-0.000842	0.005231	0.003106	0.005806	0.013726	-0.003514	0.019125	-0.027465
FOXJ2	-0.007979	0.007822	-0.007142	0.010550	0.000730	-0.006782	-0.008381	-0.017753	0.013555	0.027952	-0.010746	-0.001826
FOXK1_FOXP2_FOXB1_FOXP3	-0.015833	-0.004181	0.004386	-0.002291	-0.014651	-0.028166	0.026897	0.024639	0.026983	-0.005580	-0.001072	-0.011130
FOXL1	0.000133	0.009973	0.051824	0.029875	-0.018690	0.004776	-0.013541	-0.011657	-0.054290	0.025502	-0.020096	-0.003808
FOXM1_TBL1XR1	0.021914	-0.002739	-0.013386	0.027963	0.014894	-0.010615	0.008054	-0.063308	0.014448	-0.017348	0.015782	0.004341
FOXN1	0.008093	-0.012713	-0.036081	0.010386	0.028209	-0.007382	-0.011540	0.022852	0.012459	0.003314	-0.011623	-0.005975
FOXO3_FOXD2	-0.036016	0.012762	0.002701	0.017243	-0.012965	-0.009837	0.007369	0.022797	0.001366	-0.010856	0.027824	-0.022389
FOXO4	-0.024130	0.011903	0.017068	-0.004830	-0.004144	0.002037	0.015885	-0.008788	-0.015199	-0.002600	0.032025	-0.019226
FOXQ1	0.003471	0.014141	0.021056	-0.009127	-0.006233	0.009353	-0.020425	-0.000507	-0.022254	0.017797	-0.009345	0.002073
FUBP1	0.012283	-0.018577	0.007962	-0.002293	-0.003873	-0.014202	0.008999	0.005407	-0.000132	0.012000	-0.005579	-0.001996
GAGAACU	-0.001147	-0.000028	0.001098	-0.000627	0.000438	0.000182	0.000724	-0.000721	-0.000458	-0.000134	-0.000273	0.000947
GAGAUGA	-0.011148	-0.006577	0.009344	0.009526	-0.001094	-0.005079	-0.008744	-0.001819	-0.003643	0.008198	0.004363	0.006673
GAGGUAG	0.012601	-0.005626	-0.031728	0.013739	0.008853	-0.025518	0.014601	0.016137	-0.009568	-0.001064	-0.009420	0.016993
GATA1_GATA4	0.007864	-0.013440	0.036865	-0.005390	0.002834	-0.003540	-0.034401	0.001241	0.010998	-0.006350	0.015236	-0.011916
GATA2	-0.042270	0.019216	0.018834	0.019410	-0.025059	-0.030527	-0.008005	0.038633	-0.006836	0.015872	-0.001133	0.001864
GATA3	0.000094	-0.013891	0.066781	0.006474	-0.006855	-0.039665	0.021897	-0.003130	-0.038900	-0.009894	-0.016144	0.033234
GATA5	0.011542	0.000658	-0.002742	0.008788	0.005485	-0.005289	0.002907	-0.009472	-0.014760	0.017359	0.003160	-0.017635
GATA6	0.000783	-0.006435	0.006130	0.002232	-0.000400	-0.002933	0.002506	0.003609	-0.002347	0.002131	0.001380	-0.006657
GAUAUGU	0.001301	-0.000976	0.003173	0.001290	-0.002707	-0.002116	-0.002370	-0.000567	0.000994	0.004041	-0.003565	0.001502
GAUCAGA	0.000791	-0.000908	-0.001520	0.001348	-0.000615	-0.000539	-0.000055	0.000944	-0.000575	0.000429	0.000164	0.000536
GAUUGUC	0.014470	0.000310	0.006885	-0.007543	0.004822	-0.008251	-0.009925	-0.018882	0.009485	0.007915	-0.005309	0.006022
GCAGCAU	0.001498	0.005476	0.003186	-0.007838	-0.012971	-0.019485	0.008651	-0.006011	-0.001681	0.002775	0.022167	0.004233
GCCUGUC	0.000791	-0.002847	-0.004383	0.002199	0.004319	-0.000649	0.000528	-0.001945	-0.002585	0.001854	0.000559	0.002157
GCM1	0.014669	0.005825	-0.008329	-0.007440	-0.004872	0.003954	0.001063	0.034044	0.010320	-0.011249	-0.008627	-0.029358
GCM2	-0.006362	0.024287	-0.044553	-0.014660	0.005849	-0.003533	-0.013619	0.009464	0.017297	0.023939	0.001201	0.000691
GCUACAU	-0.006350	0.002732	0.002225	0.003065	-0.016783	0.004384	0.019345	-0.001362	-0.014388	0.003258	0.005857	-0.001984
GCUGGUG	-0.008670	-0.003183	-0.015689	-0.000940	0.001932	-0.003886	-0.001904	-0.001327	-0.002567	0.016496	-0.000867	0.020604
GFI1	-0.028755	-0.032471	-0.030347	0.015406	0.025900	0.000672	-0.022199	0.018304	0.013661	-0.019099	0.010365	0.048564
GFI1B	-0.019851	-0.017079	-0.028367	-0.010451	0.000741	-0.012831	0.027197	0.015509	0.012057	0.010642	0.006970	0.015463
GGAAGAC	-0.001588	0.013433	0.029876	-0.004638	-0.016449	-0.008240	-0.012734	0.007291	-0.014588	0.000858	0.013474	-0.006694
GGAAUGU	0.024320	0.003244	0.004027	-0.002687	-0.012422	-0.021044	-0.023490	0.013736	0.005163	0.003032	-0.013011	0.019132
GGACGGA	0.000052	0.000718	-0.000063	0.000729	0.002016	-0.001146	-0.000842	-0.002113	0.001452	-0.000233	-0.001125	0.000555
GGAGUGU	0.004898	-0.006209	-0.005995	0.001620	0.001654	0.001095	0.003810	0.005642	-0.003225	0.005636	-0.001051	-0.007875
GGCAAGA	0.000173	-0.003505	0.004669	0.000566	-0.001258	-0.000403	0.002892	0.002281	-0.001871	0.000620	0.000266	-0.004430
GGCAGUG	0.023518	0.004986	-0.001912	-0.008279	-0.012656	-0.015067	-0.003114	0.030358	0.002762	-0.017874	0.001087	-0.003809
GGCUCAG	-0.008367	-0.013932	0.028512	0.010791	0.008473	-0.023741	0.002867	0.010835	-0.005053	-0.010093	0.015520	-0.015812
GLI2	0.027211	0.007836	0.019924	-0.005126	-0.080352	-0.025232	0.020005	0.000202	0.001307	-0.012326	0.036229	0.010322
GLI3	0.009691	0.031085	-0.003142	-0.013663	-0.038136	-0.004102	-0.007604	0.001045	-0.040262	0.003432	0.031461	0.030196
GLIS1	-0.001550	-0.001439	0.002517	-0.001699	-0.002056	0.001404	-0.001505	-0.000909	0.003202	0.003809	-0.001296	-0.000478
GLIS2	-0.021058	-0.036374	0.018696	0.008255	0.021055	-0.004564	0.000076	0.006817	-0.005167	0.021024	-0.006456	-0.002305
GLIS3	-0.002149	-0.010170	0.007616	-0.006563	0.002955	0.004346	-0.005317	0.013482	-0.005445	0.005190	-0.008844	0.004899
GMEB1	-0.019720	-0.044655	0.023048	0.041861	-0.015520	0.029314	-0.015621	-0.030988	0.007841	0.038707	-0.006812	-0.007456
GMEB2	-0.060953	0.021564	0.037007	0.024782	-0.062745	-0.011902	-0.031011	0.016240	0.050162	0.002836	-0.018961	0.032981
GRHL1	-0.013235	0.009695	0.016904	-0.002651	0.010732	0.005459	-0.006649	-0.003446	-0.003325	0.001997	-0.010015	-0.005465
GSC_GSC2	0.018249	0.014005	-0.000651	0.002969	-0.015934	-0.008328	0.013818	-0.010939	0.000949	0.003989	-0.016302	-0.001825
GTF2I	0.021253	-0.069447	0.074852	-0.020913	-0.029592	-0.008439	0.004046	-0.095489	0.035145	-0.012198	0.046734	0.054049
GUAAACA	0.028992	0.004743	-0.022589	-0.003738	0.017729	-0.023580	-0.007198	0.027084	-0.006979	-0.026957	0.018939	-0.006447
GUAACAG	0.014783	0.001136	-0.006632	0.002230	-0.009444	-0.008979	0.001340	-0.006681	-0.003139	0.007132	0.002092	0.006163
GUACCGU	-0.000063	-0.000071	-0.000056	-0.000067	-0.000053	-0.000047	0.000294	-0.000061	0.000226	-0.000029	-0.000018	-0.000054
GUAGUGU	0.008877	0.004050	-0.016325	0.013541	-0.005245	-0.012199	0.010781	-0.007403	-0.008178	0.000735	0.011629	-0.000263
GUCAGUU	0.002227	-0.004879	-0.008677	0.001060	0.006516	-0.000113	-0.000938	0.001166	-0.003893	0.012458	0.000064	-0.004991
GUGCAAA	0.010965	-0.020075	-0.004371	0.002450	-0.009432	0.002183	0.008841	0.023419	-0.008071	0.003442	0.005052	-0.014402
GZF1	-0.001065	0.013889	-0.000841	0.005149	0.000500	0.007176	0.001685	-0.017293	0.002371	-0.005703	-0.010532	0.004664
HAND1	-0.003482	0.009895	0.013689	0.004555	-0.004697	-0.010759	-0.008533	0.009841	0.005605	-0.004907	-0.006477	-0.004729
HBP1	-0.001487	-0.024100	0.002614	0.002218	-0.007753	0.020582	0.012926	-0.027342	0.014838	0.016521	0.007545	-0.016562
HDX	-0.000371	-0.000335	-0.003976	0.003008	0.000586	0.002733	0.004882	-0.000227	-0.004088	-0.001424	0.002164	-0.002949
HES1	-0.020865	-0.026706	-0.001794	-0.036579	0.008776	-0.026336	0.015334	0.064008	-0.004364	0.007584	-0.027160	0.048103
HES7_HES5	0.008157	0.006579	-0.008960	0.003917	0.001806	0.003628	-0.018128	-0.001490	0.006575	-0.002795	-0.004382	0.005093
HESX1	0.008915	-0.018774	0.010246	-0.012824	0.004240	0.016847	-0.014345	-0.010581	0.006702	0.014199	-0.004406	-0.000218
HIC1	-0.032478	0.044095	-0.028621	0.005867	-0.010768	0.027355	0.019521	-0.013500	0.004262	0.030776	-0.032920	-0.013590
HIC2	0.028598	-0.016043	-0.047622	-0.016941	0.009884	-0.055723	0.014686	0.047352	0.040180	0.035324	-0.023365	-0.016330
HIF1A	-0.022809	0.030164	0.026970	0.048402	0.010467	0.009725	-0.021414	-0.013840	-0.003955	-0.012747	-0.024742	-0.026220
HINFP	0.023889	-0.006290	-0.024575	0.026122	0.012371	-0.027002	0.013300	0.013220	-0.017550	0.000411	0.003994	-0.017888
HINFP1	-0.000681	0.000727	0.001446	-0.003555	0.003149	-0.004504	0.003408	0.002449	0.004844	-0.006198	-0.006783	0.005698
HIVEP1	0.024555	-0.031145	-0.000312	0.013893	-0.018819	-0.000388	0.016681	-0.007134	0.023053	-0.004284	-0.002278	-0.013822
HLF_TEF	0.015424	-0.018880	-0.004736	-0.015648	-0.019109	0.000377	0.028775	-0.020884	0.004232	0.007210	0.023827	-0.000587
HMBOX1	-0.012801	-0.016897	0.005481	0.006294	-0.019728	0.019278	0.022858	0.010373	-0.012570	0.009687	0.003396	-0.015373
HMGA1	-0.013373	-0.014027	0.030326	-0.001757	0.009732	-0.031964	0.027530	-0.038848	-0.003491	0.009992	0.019472	0.006407
HMGA2	-0.006454	0.002453	0.001359	-0.001114	0.012416	-0.004720	0.001087	-0.004907	-0.008120	0.002178	-0.000235	0.006058
HMX1	-0.016765	0.011282	-0.007571	-0.018790	0.010363	-0.023056	-0.021370	0.041374	0.004929	0.023183	-0.000383	-0.003196
HMX2	-0.009415	0.024228	-0.022476	0.007305	0.006321	0.008726	0.004403	0.008650	0.004575	0.002007	-0.014450	-0.019875
HMX3	0.000538	0.007705	0.017529	0.013688	-0.031420	-0.014207	0.004157	-0.007768	0.016230	0.011398	0.000792	-0.018642
HNF1A_HNF1B	-0.002467	0.013597	0.005461	0.001855	0.013489	-0.012394	-0.004412	0.019714	0.008496	-0.005286	-0.010475	-0.027579
HNF4A	-0.012422	-0.005514	0.008260	0.008208	0.015075	0.004124	-0.005323	-0.003926	0.011603	0.003745	-0.007578	-0.016251
HNF4G	-0.012268	0.003218	-0.019420	-0.026482	0.020900	0.015827	-0.006456	0.014618	0.008164	-0.033307	0.027347	0.007860
HOMEZ	-0.004928	0.013554	0.033418	0.030676	-0.029577	0.013437	-0.013884	-0.013688	-0.026032	0.000626	-0.007492	0.003892
HOXA1	-0.008022	-0.010490	-0.031655	-0.000028	0.022702	0.007610	-0.012252	0.018405	-0.025683	0.003195	0.013064	0.023155
HOXA10_HOXB9	-0.002554	-0.015568	0.005704	-0.003140	-0.005759	-0.005260	0.008722	0.010512	0.012802	-0.011473	0.000817	0.005197
HOXA13	-0.001975	0.002870	0.001510	0.000265	-0.012639	0.003893	-0.011047	0.007218	0.011995	0.000435	-0.004377	0.001851
HOXA2_HOXB1	0.001363	-0.009952	-0.018742	0.011280	-0.010133	-0.020015	-0.008253	0.010667	0.003152	-0.003469	0.021045	0.023057
HOXA4	0.011423	0.000855	-0.003600	0.002444	-0.008437	0.004009	0.003635	-0.000646	0.000383	-0.011623	0.001880	-0.000322
HOXA5	-0.005608	-0.004780	-0.018704	0.010957	0.000998	0.002619	0.012872	0.013692	-0.004193	0.000147	0.008304	-0.016304
HOXA6	-0.002027	-0.006572	0.015970	-0.009830	-0.001161	-0.012350	0.008059	0.011350	-0.008486	0.002769	-0.002170	0.004448
HOXA9	0.015163	-0.010517	-0.003838	0.014856	0.001259	-0.027460	0.010369	-0.007659	0.004516	0.006911	-0.007713	0.004113
HOXB13	-0.001603	0.005693	-0.001659	0.003347	0.002493	0.001640	0.006025	0.002155	-0.008080	-0.003546	-0.004568	-0.001896
HOXB2_UNCX_HOXD3	-0.024323	-0.033471	0.007630	-0.005009	0.006783	-0.016351	0.011588	-0.020153	0.009999	0.009812	0.045725	0.007771
HOXB3	0.011812	0.004660	-0.006212	0.008033	-0.002092	-0.015372	0.008623	-0.009252	0.002375	0.008679	-0.006697	-0.004557
HOXB4_LHX9	0.005044	-0.022917	-0.002132	0.018198	-0.013095	-0.013351	0.009116	0.010137	0.008841	0.011362	-0.002737	-0.008466
HOXB5	0.018451	0.006980	-0.003119	0.001710	0.018959	-0.007618	-0.005018	-0.001530	-0.007688	0.000544	-0.011091	-0.010580
HOXB6_PRRX2	-0.012793	-0.032929	0.045389	-0.043308	0.008132	-0.017708	0.004503	0.028595	-0.017307	0.007424	0.017064	0.012938
HOXB7	-0.013476	-0.003787	-0.003483	0.041215	-0.027876	-0.013633	-0.002916	0.008499	0.004898	0.003870	0.008067	-0.001379
HOXB8	-0.024586	-0.000243	0.020927	0.046286	-0.064337	0.021503	-0.003403	0.000971	0.009204	0.003952	0.000171	-0.010444
HOXC10_HOXD13	-0.006835	-0.010808	-0.001098	-0.005260	-0.007940	0.001490	0.031009	-0.010630	0.008708	-0.005478	0.014981	-0.008139
HOXC11	-0.012935	0.009456	0.005415	-0.006910	0.000309	0.006542	0.007796	-0.002865	0.013968	-0.005548	-0.006752	-0.008476
HOXC12_HOXD12	0.003454	0.014478	0.030608	0.027162	-0.002830	-0.018297	0.024325	-0.011501	-0.017326	-0.014154	-0.007006	-0.028912
HOXC13	-0.017864	0.019243	-0.004096	-0.005039	-0.007715	0.005108	-0.011808	0.032186	-0.009914	0.001173	0.003927	-0.005201
HOXC6_HOXA7	-0.005106	-0.001925	-0.013069	-0.003584	0.007517	-0.010833	0.006609	0.006974	-0.000101	0.008333	0.004889	0.000296
HOXC8	0.043158	-0.001709	-0.002574	0.015934	0.002431	-0.012311	-0.001246	0.012157	-0.011317	0.007122	-0.001677	-0.049968
HOXC9	-0.001532	-0.009927	0.013330	0.000115	-0.010008	-0.006952	0.014012	-0.003035	-0.001134	-0.015045	0.019344	0.000835
HOXD1	0.010392	-0.005196	-0.001027	0.000607	0.004372	-0.005111	0.001292	0.001786	-0.006027	-0.002366	-0.003097	0.004375
HOXD10	0.016635	0.022261	0.021614	-0.017329	0.008499	-0.012110	-0.010827	-0.024873	-0.011243	0.008090	-0.002740	0.002024
HOXD11_HOXA11	-0.029776	0.005316	0.054678	-0.016954	-0.017067	0.014151	0.017520	-0.009286	-0.007086	0.017791	-0.000420	-0.028867
HOXD4	0.000388	-0.008355	-0.011225	0.008679	-0.004593	-0.005051	-0.009207	0.010507	0.001049	-0.000624	0.020208	-0.001777
HOXD9	-0.006548	-0.003843	-0.002247	0.004333	0.003222	-0.008551	0.000786	0.002346	-0.003570	0.006614	0.022228	-0.014769
HSF1	0.025986	-0.011783	-0.039556	-0.060076	-0.008748	0.032564	0.015348	0.020132	0.002744	0.044369	0.003862	-0.024842
HSF2	0.010125	-0.005159	-0.006056	-0.004303	-0.023835	-0.016276	0.009089	-0.007752	0.006725	0.016923	0.010325	0.010194
HSF4	0.015016	0.002220	-0.012829	-0.006597	-0.011876	0.002150	-0.000759	-0.000634	-0.020087	0.022912	0.001497	0.008987
HSFY2	-0.025027	-0.005030	0.012684	0.041576	0.032607	0.006258	-0.023069	-0.022927	-0.029631	0.019067	-0.030197	0.023689
ID4_TCF4_SNAI2	-0.024429	-0.025573	0.004017	-0.051618	0.021885	0.037813	0.001750	0.027585	-0.013944	0.025506	-0.022143	0.019150
IKZF1	0.005306	0.011268	0.004625	0.034164	-0.007298	-0.016203	-0.004624	-0.011124	0.026136	0.018396	0.006544	-0.067190
IKZF2	-0.016647	-0.012868	-0.021285	0.003599	0.005518	0.022784	0.022178	-0.015668	0.026524	-0.010676	0.003922	-0.007381
INSM1	0.014950	-0.021367	-0.024278	-0.011423	-0.008812	0.007192	0.032067	0.001461	-0.011059	0.007077	-0.011499	0.025692
IRF2_STAT2_IRF8_IRF1	-0.012029	0.014614	0.013312	-0.018739	-0.012548	-0.004891	-0.024836	0.014469	0.035023	0.010749	-0.024052	0.008928
IRF3	-0.003707	0.010860	-0.020570	0.000149	-0.020987	0.007564	0.009844	0.007429	0.000664	-0.001808	0.015596	-0.005034
IRF6_IRF4_IRF5	-0.017080	0.014340	0.024960	-0.013173	0.015851	0.003485	-0.009700	-0.015358	-0.010873	-0.000808	-0.015794	0.024151
IRF7	-0.016754	0.028038	0.001730	0.032260	-0.045156	-0.044899	0.005720	0.010091	0.011794	0.006628	0.003748	0.006801
IRF9	0.005220	0.001600	0.007744	-0.016011	0.014954	-0.003162	-0.005784	0.001780	0.013935	0.000344	-0.015016	-0.005603
IRX2	-0.005981	0.006279	-0.010425	-0.010637	-0.007800	0.000258	-0.002558	-0.001631	0.012129	0.015942	0.003799	0.000623
IRX3	0.000827	0.040932	0.011156	-0.014957	-0.002068	0.005408	-0.013899	-0.010498	-0.011348	0.014740	-0.016801	-0.003492
IRX5	0.001944	0.003533	0.010219	-0.008506	-0.007958	0.009704	-0.002912	-0.007758	0.014866	-0.007716	-0.001678	-0.003738
IRX6_IRX4	0.000654	-0.002229	0.014327	-0.002233	-0.007386	0.003395	0.004143	-0.006830	0.005980	-0.008152	-0.001045	-0.000623
ISL1	0.008319	-0.020858	0.003147	0.000172	-0.004028	-0.000004	-0.003317	0.002850	0.000663	0.012998	0.005885	-0.005827
ISL2	0.003128	0.004541	0.002114	-0.007274	-0.010545	0.012124	-0.002723	0.016732	0.001529	-0.006992	-0.007022	-0.005612
ISX	0.004876	-0.013002	-0.004782	0.010447	-0.002590	0.000062	0.001710	-0.016921	0.013731	0.003658	0.004727	-0.001915
JDP2	-0.007089	0.011797	0.004962	0.008693	-0.017452	-0.000898	-0.000704	0.004926	0.030130	-0.012370	0.004471	-0.026465
JUN	-0.004217	0.015054	0.026115	0.016660	-0.015594	0.038937	-0.010407	0.007562	-0.005140	-0.002771	-0.008338	-0.057862
JUND	-0.010202	-0.004538	-0.011221	0.005770	-0.003335	0.010434	-0.000219	0.013618	0.000934	-0.005002	-0.002271	0.006031
KLF1	0.007028	-0.011741	-0.005092	-0.024387	-0.004195	-0.030551	-0.022291	0.036427	0.039712	0.056147	-0.021258	-0.019797
KLF12	-0.019929	-0.014738	0.054293	0.015784	-0.007082	-0.009428	-0.012473	0.001936	-0.015418	-0.006219	-0.009946	0.023220
KLF13	0.008710	-0.000533	-0.006278	0.002683	-0.008661	0.001425	0.011868	-0.001710	-0.002171	-0.007879	0.012797	-0.010252
KLF14_SP8	-0.039422	-0.010262	-0.024557	0.023541	0.000274	-0.000491	-0.005345	0.035196	0.033950	-0.016582	0.025522	-0.021824
KLF15	-0.033267	0.018207	-0.033448	0.003485	-0.018837	0.010377	0.005463	0.012241	0.000412	0.021890	0.018592	-0.005115
KLF16_SP2	-0.014206	-0.004613	0.013391	-0.023544	0.033131	-0.026557	0.042259	-0.054883	0.005363	-0.020354	0.054796	-0.004783
KLF3	-0.005668	0.011931	-0.014581	-0.004585	-0.008553	0.021342	-0.008063	0.010217	-0.001081	-0.000487	0.008015	-0.008488
KLF6	-0.017942	-0.025617	0.010692	-0.013234	0.003946	-0.017351	-0.001610	-0.018196	0.012645	0.013004	0.045751	0.007912
KLF7	0.002950	-0.005360	-0.002940	0.008804	0.004516	0.003882	-0.000173	-0.003438	-0.016428	-0.005374	0.007046	0.006515
KLF8	0.054728	-0.005431	-0.037023	-0.020369	0.026103	-0.073305	0.017961	0.016481	-0.046973	-0.001433	0.055713	0.013550
LEF1	-0.002465	-0.027552	-0.028561	0.013885	-0.002773	0.003227	-0.003981	0.000232	0.021070	0.007026	-0.015108	0.034998
LHX2	0.014069	-0.000644	0.006484	0.005687	-0.006204	-0.004899	-0.005202	-0.001902	-0.001953	0.002134	-0.009106	0.001538
LHX3	0.000964	-0.009268	0.011020	-0.020813	0.001387	0.002455	0.005162	-0.005489	0.009084	0.003333	0.005037	-0.002872
LHX6	-0.016396	-0.032189	-0.000689	0.021365	0.020277	0.001516	-0.008556	0.004795	-0.012750	0.008418	0.016326	-0.002116
LHX8	0.000986	-0.003102	0.001557	-0.014414	0.005991	-0.001000	-0.001934	0.004574	-0.002772	0.012122	-0.014873	0.012865
LMX1B_MNX1_RAX2	-0.004849	0.000141	0.001842	-0.009299	-0.003272	-0.007796	0.011690	-0.017685	-0.004433	0.001139	0.036857	-0.004335
MAFA	0.007225	-0.008501	0.005261	-0.002359	0.002313	-0.005924	-0.007180	0.006144	0.001305	-0.013506	0.004234	0.010988
MAFB	0.024444	0.023761	0.013794	0.010053	-0.009569	0.006915	-0.054121	-0.005434	0.026477	-0.005665	-0.002241	-0.028416
MAFF_MAFG	-0.017510	0.004636	0.027439	-0.013299	0.009792	0.006997	-0.017358	0.012133	-0.010893	-0.016163	0.002444	0.011783
MAFK	-0.025855	-0.024354	0.017763	0.008376	0.037096	0.009024	-0.002758	-0.030850	-0.052351	0.040928	0.021150	0.001829
MAF_NRL	0.011904	-0.018232	0.016401	-0.005871	-0.008124	0.013907	-0.006110	-0.005993	0.002633	0.017071	0.014011	-0.031596
MAX_TFEB	-0.037396	-0.007908	-0.021281	0.019246	0.002539	0.016514	-0.004464	0.009982	-0.011091	-0.006980	0.011111	0.029728
MAZ_ZNF281_GTF2F1	-0.035457	-0.001803	0.031334	0.001178	0.040232	-0.001683	-0.058008	0.018094	0.026776	0.013012	-0.002414	-0.031260
MBD2	-0.020142	-0.020209	0.005018	-0.010915	0.005755	-0.030503	0.020700	0.000461	-0.008595	0.003971	0.051851	0.002608
MECOM	-0.031664	-0.012464	0.011126	0.009872	-0.013144	0.014208	0.004093	-0.002557	-0.003348	0.003326	0.010819	0.009734
MECP2	0.040122	0.006461	0.030152	0.013484	-0.049458	-0.062173	-0.008962	0.033296	-0.017755	0.031354	0.009530	-0.026052
MEF2B	-0.013492	0.004217	-0.011718	-0.007787	0.008058	0.011049	0.000126	0.017983	-0.001295	0.019124	-0.013347	-0.012918
MEF2C	-0.004434	-0.009165	-0.004236	-0.001017	0.019934	0.004526	-0.002618	0.010714	0.009747	0.004370	0.000527	-0.028347
MEF2D_MEF2A	-0.005486	-0.001540	-0.004113	0.014336	0.005492	0.020997	-0.004505	0.012019	0.005399	0.000083	-0.013793	-0.028888
MEIS1	-0.032145	0.014265	0.022401	-0.003225	-0.007560	-0.002370	0.034757	-0.007715	-0.017253	0.029858	0.002128	-0.033141
MEIS2	-0.043217	-0.009931	0.028181	0.022295	-0.019395	-0.004172	0.017147	0.024326	0.055344	-0.008542	0.013984	-0.076019
MEIS3_TGIF2LX	0.011402	0.013628	0.009834	-0.002924	-0.005188	-0.003987	0.007852	-0.017945	-0.006609	0.000702	0.013082	-0.019846
MESP1	0.004246	-0.028633	0.024206	-0.039496	-0.047419	0.048925	0.006559	0.035524	-0.000033	-0.026475	0.016743	0.005853
MIXL1_GSX1_BSX_MEOX2_LHX4	-0.006790	-0.007839	0.013009	-0.012226	0.010063	-0.026484	0.002015	-0.023829	0.028860	-0.010802	0.052982	-0.018961
MLXIPL	0.010235	-0.010920	0.031877	0.044289	-0.007308	-0.039762	0.009395	-0.030364	-0.007834	-0.011694	-0.014277	0.026362
MLX_USF2_USF1_PAX2	-0.041105	0.004032	-0.010653	0.057883	0.028342	-0.001351	0.002776	0.044799	-0.035933	0.001377	-0.031501	-0.018666
MNT_HEY1_HEY2	-0.022904	0.086546	0.055796	0.000159	-0.035913	0.019769	-0.052494	-0.050058	-0.000428	-0.014069	-0.028350	0.041946
MSX1	-0.008730	-0.005048	0.007743	0.002892	-0.002070	-0.004033	-0.000599	-0.003465	0.005593	0.004417	0.003145	0.000155
MSX2	0.004782	0.007919	0.003860	0.020623	0.004067	-0.009726	0.013455	-0.012170	-0.026402	-0.006307	0.011992	-0.012092
MXI1_MYC_MYCN	0.001669	0.029287	-0.053208	-0.057470	-0.020138	0.018108	-0.040812	0.014661	0.029617	0.015423	0.005356	0.057506
MYB	-0.013195	0.018675	-0.025602	-0.014871	0.023325	0.017155	-0.012116	-0.001621	-0.014956	-0.021457	0.012098	0.032565
MYBL1	-0.014266	-0.004402	0.030810	0.037259	-0.015525	-0.001751	-0.023670	0.010604	0.003562	0.011716	-0.011089	-0.023249
MYBL2	0.007727	0.008382	-0.024711	0.010192	-0.009345	-0.000791	-0.020578	-0.011847	0.008466	0.004121	0.025166	0.003218
MYF6	-0.020227	-0.013475	-0.034323	0.046526	-0.001058	-0.004674	0.004155	-0.005773	0.051727	-0.020025	-0.013966	0.011113
MYOD1	-0.013528	-0.008590	0.012914	0.004632	-0.013050	-0.033652	-0.003966	0.005546	0.026971	0.060272	-0.028639	-0.008909
MZF1	0.016808	0.025832	0.009867	-0.018724	-0.028012	0.032642	-0.044144	0.018069	-0.021807	0.000471	0.016487	-0.007489
NANOG	-0.006607	0.016416	0.008227	-0.017452	-0.012954	0.007889	0.002014	0.013431	-0.003754	0.009828	-0.007935	-0.009104
NFAT5	0.021739	-0.008371	-0.005662	-0.003350	-0.002107	0.004541	-0.002649	0.007871	0.003399	-0.012573	-0.004383	0.001547
NFATC1	-0.017014	0.011182	-0.024334	0.012248	-0.005883	0.020644	0.000708	-0.025696	0.011896	0.033252	0.003074	-0.020076
NFATC2_NFATC3	0.005731	-0.003367	-0.024879	0.017047	0.000780	0.005623	0.023544	0.007070	-0.003323	-0.022270	0.003393	-0.009350
NFATC4	0.004624	0.013463	0.015943	0.013458	0.007522	-0.025255	-0.013050	0.010506	-0.003696	-0.009156	0.005401	-0.019760
NFE2L1	-0.009574	-0.001176	-0.008103	0.005014	0.032677	0.001550	0.025836	-0.003381	-0.018877	0.003430	0.010181	-0.037578
NFIA	0.008126	-0.037233	0.016207	-0.024106	-0.003316	0.011819	0.035619	0.003178	0.025664	-0.028182	0.010413	-0.018189
NFIL3	0.030123	-0.027810	-0.009140	-0.017271	-0.015259	-0.011759	0.071296	-0.008973	-0.010592	-0.023094	0.021325	0.001153
NFIX_NFIB	-0.000234	-0.002383	0.034061	-0.008224	0.001492	0.014527	0.010240	-0.030883	-0.018454	-0.001451	0.023304	-0.021994
NFKB1	0.004645	-0.009143	0.000977	0.028009	0.003210	0.017525	-0.020732	-0.005499	0.010353	-0.026226	-0.004191	0.001072
NFKB2	0.007719	-0.004272	0.020881	-0.006651	-0.006198	-0.000261	0.023197	-0.021879	-0.006101	0.005593	0.023139	-0.035166
NHLH1	0.014036	-0.002633	0.021401	-0.006224	0.006494	0.012728	-0.018438	-0.008727	0.002141	0.005751	-0.008776	-0.017752
NKX1-1	0.006350	0.015020	-0.000926	-0.003267	0.000728	-0.007365	-0.001427	-0.001646	-0.009609	0.000977	0.001114	0.000052
NKX1-2_RAX	0.012647	-0.007042	-0.005657	-0.001512	0.006742	-0.002110	-0.020402	0.002688	-0.000405	0.003623	0.000974	0.010454
NKX2-1	0.014498	-0.003709	-0.007171	0.006780	-0.017967	0.008750	-0.008283	0.006258	-0.005201	0.001637	0.006447	-0.002039
NKX2-2	0.012599	0.042288	-0.007705	-0.007642	-0.028609	-0.019633	-0.013256	0.009792	-0.004927	0.022354	0.016672	-0.021935
NKX2-3	0.027126	-0.002896	0.023285	-0.035943	0.004654	0.001816	-0.004094	0.014068	-0.024836	0.013875	0.008452	-0.025506
NKX2-4	-0.000100	-0.016786	0.003373	-0.001424	-0.014746	-0.000921	0.005824	-0.003377	0.001360	0.002534	0.025089	-0.000825
NKX2-5	0.017680	-0.006243	-0.009523	0.001408	-0.014900	0.013459	-0.004192	0.003980	0.000363	0.012915	-0.006825	-0.008122
NKX2-6	0.029034	-0.019072	0.024855	-0.032053	-0.000318	-0.004236	-0.007316	-0.003651	-0.011636	0.021046	0.022549	-0.019202
NKX2-8	0.005032	-0.001880	0.005581	0.002128	-0.012140	0.004304	-0.004350	-0.000218	0.005300	-0.007651	0.006042	-0.002148
NKX3-1	0.009273	-0.013827	0.014647	-0.011093	0.006548	-0.018524	0.005160	-0.005033	-0.005364	0.012718	0.023225	-0.017730
NKX3-2	0.028167	0.002411	0.029814	-0.001238	-0.005202	0.004467	-0.020048	-0.013455	0.023881	-0.032704	-0.014751	-0.001343
NKX6-2	-0.004453	0.002969	0.008451	-0.005265	0.006879	0.013927	-0.014211	-0.001080	0.019797	-0.010028	-0.017870	0.000885
NKX6-3	0.002254	0.000259	0.001797	-0.003333	0.001134	-0.000531	-0.003509	-0.002224	0.000655	-0.001677	0.007832	-0.002657
NOTO_VSX2_DLX2_DLX6_NKX6-1	0.007890	-0.015264	-0.010696	-0.024754	0.013119	-0.014851	0.011772	-0.009496	0.019188	-0.000339	0.029734	-0.006303
NR0B1	-0.013567	-0.008854	0.000276	-0.011135	-0.000521	-0.009787	0.017452	0.013948	0.015715	0.041787	-0.031172	-0.014142
NR1D1	0.008571	-0.020351	-0.002721	0.004247	-0.006989	0.002745	0.017381	0.000160	-0.011668	-0.000698	-0.000300	0.009623
NR1H2	-0.000235	0.001243	-0.002270	0.002902	-0.005312	-0.005191	-0.013192	0.015608	-0.000571	0.004150	0.008553	-0.005683
NR1H4	0.007751	0.019610	-0.013029	-0.002174	0.013354	0.017114	0.005974	-0.037329	0.000217	-0.000985	-0.012046	0.001542
NR1I2	-0.004386	0.008602	0.013979	0.011935	0.010881	-0.009895	-0.019849	-0.006881	-0.023888	0.015944	0.014814	-0.011255
NR1I3	-0.001990	-0.012227	-0.002912	0.003237	0.008657	-0.016340	0.006730	-0.003414	0.016996	-0.003227	0.010796	-0.006306
NR2C1	0.001014	0.026604	-0.007370	0.000367	0.006994	-0.014687	-0.003734	0.000621	-0.008626	-0.000828	0.001179	-0.001535
NR2E1	0.023699	-0.001738	-0.029026	-0.020280	-0.016905	0.006295	-0.010280	0.036876	0.008038	0.005395	-0.011436	0.009361
NR2E3	0.022092	-0.010317	0.027840	-0.019304	-0.013355	0.006260	0.001952	-0.022148	0.002249	-0.001007	0.001576	0.004160
NR2F1	0.007472	-0.010503	0.000492	-0.008761	0.015890	0.006037	0.004440	-0.009556	0.017938	0.008698	-0.020331	-0.011817
NR2F2	0.037814	-0.008428	-0.003141	0.001860	-0.048226	-0.004563	0.036087	-0.006513	-0.035295	0.035363	0.005753	-0.010710
NR3C1	0.015853	0.046629	0.028925	0.004152	-0.002210	-0.011048	-0.032141	-0.006334	-0.020459	0.024616	0.003710	-0.051694
NR4A1	0.012822	-0.014006	-0.001900	0.010153	-0.006223	0.014947	-0.015510	-0.009085	0.015078	0.000033	0.006129	-0.012437
NR4A2	0.002753	-0.008574	0.008422	0.026310	-0.007574	0.020289	-0.026647	-0.003186	-0.007863	0.008920	-0.020526	0.007676
NR4A3	-0.005881	-0.010294	0.015684	0.024518	-0.006622	0.036620	-0.050460	0.011675	0.032575	0.001026	-0.007717	-0.041125
NR5A2	0.004976	-0.002642	0.022285	-0.003693	-0.020353	0.041117	-0.007116	-0.002092	-0.008084	-0.023867	0.002887	-0.003418
NR6A1	-0.029683	0.015007	-0.022547	0.004189	0.001514	0.045878	-0.003758	0.008142	-0.019142	-0.005708	-0.009155	0.015263
NRF1	0.028363	0.032545	-0.053219	0.056870	0.007586	0.041417	-0.072371	0.001920	-0.035880	0.012849	-0.024192	0.004112
OLIG1	-0.004983	-0.007969	0.002818	-0.004834	0.000880	0.003139	0.009942	0.005016	-0.005992	-0.000143	-0.005687	0.007812
OLIG2_NEUROD1_ATOH1	0.025108	-0.011951	0.018955	-0.032394	0.009762	-0.024502	-0.021839	-0.000873	0.032326	0.020256	-0.005743	-0.009106
OLIG3_NEUROD2_NEUROG2	0.018690	0.005915	0.018183	0.009740	-0.007672	-0.046624	-0.000211	0.002344	-0.006710	-0.009785	0.000997	0.015133
ONECUT1	-0.003668	0.021491	-0.002476	-0.012320	-0.006651	-0.014480	-0.005894	-0.017357	0.018587	0.003273	0.030715	-0.011220
ONECUT2_ONECUT3	0.002708	0.015785	0.025406	-0.019397	-0.004349	-0.000352	0.014344	-0.002087	-0.003623	-0.010498	0.011261	-0.029197
OSR1_OSR2	-0.000949	-0.015739	0.009249	0.020776	-0.003066	-0.010749	-0.004942	-0.002405	0.011612	-0.012470	-0.002413	0.011096
OTP_PHOX2B_LHX1_LMX1A_LHX5_HOXC4	0.011616	-0.011962	0.009248	0.008358	-0.003976	-0.018922	-0.006195	0.014475	0.012472	-0.007045	-0.003122	-0.004947
OTX1	-0.014388	-0.010649	0.003357	-0.007636	-0.005518	0.023804	-0.003652	-0.010454	-0.001855	0.005434	0.011719	0.009839
OTX2_CRX	0.007929	0.008557	-0.002314	0.000557	-0.005720	-0.006635	0.021372	-0.004782	-0.013230	0.003736	-0.008678	-0.000791
OVOL1	0.000464	0.003739	-0.000203	0.006779	-0.003787	-0.003621	-0.000537	0.001400	0.002684	-0.003121	0.000601	-0.004397
PATZ1_KLF4	0.015112	0.025900	-0.042298	-0.011033	0.009417	0.021824	-0.001937	-0.010579	-0.017550	0.024948	0.009035	-0.022839
PAX1_PAX9	-0.001626	-0.003983	0.008865	-0.003070	0.007441	0.003993	0.001109	0.005324	0.002126	-0.003367	-0.011443	-0.005370
PAX3	-0.002925	0.001478	-0.009105	0.021387	-0.009396	-0.025731	-0.002510	0.001388	0.027617	-0.009748	0.006318	0.001228
PAX4	-0.012533	0.015441	0.003159	-0.011606	-0.000483	0.003451	-0.016633	-0.004873	0.009980	-0.013925	0.016755	0.011268
PAX5	-0.013029	0.028176	-0.035039	0.027221	-0.046554	0.061455	-0.024789	0.012120	-0.076486	0.035171	0.038709	-0.006955
PAX6	-0.002604	0.005993	-0.010561	0.011866	-0.001401	0.012441	0.008071	-0.011006	-0.008875	0.002082	-0.003433	-0.002573
PAX7_NOBOX	0.000717	-0.029627	-0.016646	0.043611	-0.007117	0.006150	-0.006006	0.007017	0.017457	-0.003672	-0.018679	0.006794
PAX8	-0.010025	0.000570	-0.003776	0.012837	-0.015467	-0.004443	0.024658	-0.009370	-0.015165	0.005975	0.007472	0.006733
PBX1	-0.028098	-0.013218	-0.013730	0.006583	0.002256	0.010094	0.001869	0.017218	-0.009612	-0.009903	0.015734	0.020807
PBX2	-0.011735	-0.003882	-0.008947	0.010980	0.005088	0.003052	-0.000229	-0.003598	0.002472	0.003645	0.005508	-0.002353
PBX3	0.009319	-0.019462	0.001839	-0.054405	-0.019903	0.046313	0.038898	-0.015072	0.027997	-0.014256	0.011679	-0.012946
PDX1	-0.010965	0.002164	-0.004607	-0.020025	0.010554	-0.008701	0.003314	-0.000118	0.012334	-0.019084	0.029627	0.005507
PGR	0.015655	-0.025660	0.007183	-0.014373	0.022393	0.003472	-0.002376	-0.002301	0.007118	0.002898	0.000461	-0.014470
PITX1	0.065255	-0.000238	-0.072841	0.034060	-0.058329	-0.017146	0.047339	-0.022229	-0.040441	0.026715	0.052926	-0.015071
PITX2	0.004874	-0.002407	0.003800	0.000221	0.001639	0.001119	0.002865	0.000005	0.003797	-0.000216	-0.005367	-0.010329
PITX3	-0.041247	0.038509	-0.037043	-0.002134	-0.023167	0.024184	0.005402	-0.015709	-0.020110	0.003012	0.058825	0.009478
PKNOX1_TGIF2	0.012939	-0.014166	-0.020691	0.008052	0.013325	0.002669	0.007456	0.028262	0.009969	-0.011906	-0.005615	-0.030292
PKNOX2	0.000848	-0.008998	0.010775	-0.006417	0.005484	0.008038	0.000646	-0.003043	-0.006420	-0.009156	-0.001486	0.009730
PLAG1	0.010629	-0.015618	0.004900	-0.006910	-0.002238	-0.003802	0.002291	-0.007793	-0.002537	0.001545	0.017650	0.001885
PLAGL1	-0.002840	-0.011196	0.016133	-0.021843	-0.013473	0.008161	0.013154	0.007539	-0.021221	-0.040660	-0.004633	0.070879
POU1F1	-0.008018	0.008832	0.004653	-0.008032	0.002743	-0.005860	0.029964	-0.008433	0.005451	-0.015969	0.004545	-0.009874
POU2F1	-0.005960	0.006039	0.019884	0.007952	-0.008093	-0.011053	-0.008280	0.005568	-0.020009	0.011944	-0.001758	0.003763
POU2F2_POU3F1	0.003606	-0.013737	0.010549	-0.001125	0.026012	-0.021062	0.002472	-0.017761	-0.029106	0.008788	0.003195	0.028169
POU3F2	-0.000259	0.061852	-0.022899	-0.009181	0.010230	0.013391	-0.002907	-0.017658	0.018699	-0.035575	-0.010220	-0.005476
POU3F3_POU3F4	0.009762	-0.015329	-0.006037	0.026739	0.000235	-0.006006	0.016259	-0.008499	-0.011287	0.013985	-0.009137	-0.010686
POU4F1_POU4F3	0.002665	-0.004924	-0.004620	0.009736	0.003081	-0.000114	0.000996	0.009924	-0.011152	0.033251	-0.000982	-0.037861
POU4F2	0.002591	0.001399	-0.007454	-0.019092	-0.001925	0.000948	0.005132	0.003379	0.010167	0.002119	-0.000021	0.002758
POU5F1_POU2F3	0.005690	-0.038400	0.007504	-0.009094	0.040991	0.005143	-0.003319	-0.023265	-0.017915	-0.003299	0.012746	0.023218
POU6F1	0.013172	-0.007247	0.006029	-0.006553	0.009719	0.001683	0.001677	-0.010631	-0.002995	-0.008514	0.007332	-0.003671
POU6F2	-0.000079	-0.007335	-0.005561	-0.011681	-0.006986	0.004410	0.003528	-0.006797	0.017757	0.003913	0.020198	-0.011366
PPARA	-0.027006	0.022242	-0.000189	0.018143	0.008042	-0.024912	-0.004902	-0.002218	0.029491	-0.011450	-0.005972	-0.001269
PPARD	0.006911	-0.006721	0.002696	-0.008340	0.001698	0.001975	-0.012363	-0.016592	0.003569	0.008549	0.021887	-0.003269
PPARG	-0.034798	-0.001908	-0.014283	0.004100	0.003773	0.010132	0.008183	0.017821	-0.002115	0.019089	-0.011553	0.001559
PRDM1	-0.002237	-0.002917	0.016379	-0.010097	-0.002910	-0.010956	-0.006858	-0.004584	0.008050	0.002475	0.008548	0.005106
PRDM14	0.000795	-0.005694	-0.010383	0.001156	-0.007362	-0.003612	0.009130	-0.002812	0.004481	0.001678	0.008911	0.003713
PRDM4	-0.009445	0.002659	0.009652	-0.000554	-0.012985	0.010383	-0.004025	0.010476	-0.009548	0.000611	0.005097	-0.002321
PROX1	-0.005374	0.014516	-0.006825	0.021163	-0.018360	0.019301	-0.035628	-0.003049	-0.004872	-0.000664	0.004797	0.014994
PRRX1_ALX4_PHOX2A	-0.017139	-0.016140	0.008487	-0.016908	0.007541	-0.005342	-0.012549	0.003627	0.002344	-0.007810	0.033544	0.020344
PTF1A	-0.001531	0.021251	-0.001787	-0.018483	0.006505	-0.010830	0.007920	-0.009761	-0.002839	0.005456	-0.006803	0.010902
RAD21_SMC3	0.001496	0.008592	0.000318	0.025781	-0.031972	-0.030493	-0.014599	-0.008760	0.022387	0.033416	-0.000094	-0.006071
RARA	0.005554	-0.023535	0.014185	0.007302	-0.017527	-0.010021	0.007835	-0.010575	0.004434	0.035685	0.025419	-0.038756
RARB	0.011452	-0.001471	0.002784	0.004731	-0.018354	-0.000831	-0.007183	0.009898	-0.015149	0.011646	0.017350	-0.014875
RARG	-0.020257	0.019272	0.026520	0.014653	0.020476	-0.032782	-0.025007	-0.014050	0.015728	-0.006429	0.002389	-0.000512
RBPJ	-0.027760	-0.012648	-0.009237	0.014931	-0.001464	0.009170	-0.003643	0.007668	-0.007674	-0.014203	0.022714	0.022147
RCOR1_MTA3	-0.024177	0.009563	0.004641	0.014482	0.015970	0.043335	-0.001412	-0.004676	-0.032350	-0.021329	-0.011046	0.006999
REL	0.005106	-0.020612	-0.028252	0.033907	-0.009897	0.011307	-0.010789	0.016330	0.017063	-0.007948	-0.013916	0.007701
RELA	-0.015262	0.001184	0.002954	0.035510	0.012097	0.022432	-0.021293	-0.027122	0.029694	-0.033994	-0.005628	-0.000571
RELB	0.006282	0.006554	-0.008803	-0.003648	-0.019619	0.009327	-0.004495	-0.018333	0.029728	0.013398	0.005695	-0.016086
REST	0.003031	0.003264	-0.008334	-0.005244	0.008034	0.007971	0.014755	-0.000764	-0.007154	0.003595	-0.005020	-0.014134
RFX3_RFX2	-0.011552	0.006990	0.001389	-0.027353	-0.056372	-0.019031	0.004639	0.009281	0.030415	0.007120	-0.000248	0.054721
RFX5	-0.000159	0.006371	-0.006317	-0.003489	0.006313	-0.004627	0.010934	-0.002337	0.004230	-0.005144	0.006822	-0.012597
RFX7_RFX4_RFX1	-0.050288	0.041912	-0.019431	-0.048466	-0.016489	-0.029790	0.028814	-0.027611	0.040508	0.057558	-0.025385	0.048667
RHOXF1	0.009296	0.021967	0.030976	-0.031841	-0.018724	-0.001939	0.017143	0.039575	-0.005159	0.004154	-0.019141	-0.046306
RORA	0.006793	0.004326	-0.008017	0.030777	-0.006398	-0.001979	-0.003995	0.014542	0.012347	-0.035124	-0.001430	-0.011843
RORC	0.003596	-0.008932	0.014320	-0.004561	0.003748	-0.001399	-0.005883	0.002941	0.011553	-0.004782	0.006670	-0.017269
RREB1	0.018240	-0.017030	-0.002620	-0.005861	-0.004949	-0.000436	-0.011989	-0.005485	0.015919	0.007811	0.008606	-0.002207
RUNX1_RUNX2	-0.010805	-0.000849	-0.018483	0.033091	-0.024146	0.084264	0.012776	0.020041	-0.043828	-0.003971	-0.034032	-0.014059
RUNX3_BCL11A	-0.012994	-0.007163	-0.003183	0.006125	-0.014061	0.020378	0.006188	-0.008408	-0.026962	0.025867	0.003428	0.010787
RXRA_NR2F6_NR2C2	0.010804	-0.023469	0.011725	-0.043567	0.015147	-0.023861	0.009793	-0.019339	0.054649	0.029516	0.003879	-0.025278
RXRG	0.001580	-0.008646	0.016074	-0.012125	0.016002	-0.002475	0.001163	0.019773	0.004056	0.023663	-0.029241	-0.029825
SCRT1_SCRT2	-0.012102	0.014233	0.002389	0.001595	-0.018305	-0.017355	0.017456	-0.019349	0.011508	-0.001018	0.015140	0.005808
SHOX	0.017915	-0.007584	-0.001011	-0.003192	0.010316	-0.021641	-0.008050	-0.014966	-0.012345	0.001704	0.041467	-0.002613
SHOX2_HOXC5	0.003027	-0.047284	-0.050485	0.006633	0.004422	-0.017960	-0.008853	0.006830	0.073964	-0.007731	0.012636	0.024800
SIN3A_CHD1	0.001806	-0.009035	-0.006976	-0.064843	-0.011004	-0.008103	0.047728	0.018685	0.006183	-0.009775	0.025056	0.010276
SIX1_SIX3_SIX2	0.020229	-0.020226	-0.009317	0.009254	0.004756	-0.031558	0.016660	0.001704	-0.016847	-0.001808	0.022789	0.004363
SIX4	-0.003087	-0.004590	-0.004615	0.007646	0.008266	-0.009721	0.005427	0.000602	-0.012049	-0.002145	0.010013	0.004252
SIX5_SMARCC2_HCFC1	0.006092	0.044355	-0.024349	-0.046995	-0.022060	0.027160	-0.033421	-0.011214	-0.050578	0.017057	-0.021162	0.115115
SIX6	0.020191	-0.000039	0.006408	0.003498	-0.010284	-0.002828	-0.007515	-0.000274	0.007516	0.006729	-0.009984	-0.013417
SMAD1	0.037198	-0.030878	-0.027661	0.004548	-0.040476	0.034569	-0.000524	0.003630	0.004214	0.006477	0.007116	0.001788
SMAD2	0.000392	-0.009565	-0.011148	0.018399	0.007217	0.012046	-0.028512	-0.001860	0.007000	-0.013291	0.030194	-0.010873
SMAD3	0.001653	-0.004310	0.008834	-0.009285	0.008579	0.008403	0.012128	-0.003891	-0.020515	-0.006989	-0.010158	0.015550
SMAD4	0.035098	-0.014875	0.009582	-0.003939	-0.002190	0.022437	-0.040168	0.026874	0.029460	-0.049660	0.001235	-0.013854
SOX1	0.024329	-0.012018	-0.011215	-0.012782	-0.005549	-0.019119	-0.002408	-0.011929	0.015838	0.006742	-0.001289	0.029400
SOX10_SOX15	0.018844	-0.004821	-0.027284	0.018165	0.031541	0.001790	0.009754	-0.041434	-0.006738	0.002968	-0.013798	0.011014
SOX11	-0.007716	0.005070	-0.012049	0.024549	0.004674	-0.000396	-0.004581	-0.007516	-0.004628	0.006541	-0.006755	0.002806
SOX13_SOX12	-0.000476	-0.005201	0.019058	0.003257	0.012727	0.015788	0.054239	-0.020048	-0.010210	-0.019326	-0.024720	-0.025087
SOX14	0.023001	-0.020119	0.002180	0.018857	-0.013802	-0.010246	0.005088	0.019893	0.002749	-0.020749	-0.004954	-0.001897
SOX17	0.012363	0.018442	0.000825	0.018565	0.008090	-0.015308	-0.000043	0.007198	-0.006994	0.001931	-0.009810	-0.035259
SOX18	0.001112	0.001643	-0.017267	0.004156	-0.003078	0.000132	0.014454	-0.013207	0.004608	0.005072	-0.016355	0.018729
SOX21	0.006218	-0.000397	0.001158	-0.003973	-0.009934	0.020430	-0.004491	0.001942	-0.006190	0.000749	0.007768	-0.013281
SOX30	-0.007503	-0.002541	0.012017	-0.007467	0.002225	0.007705	0.002192	-0.003204	0.000778	-0.006834	-0.007168	0.009801
SOX3_SOX2	0.028172	-0.068199	-0.052469	-0.004184	0.051989	-0.021193	-0.019027	0.022276	-0.016373	0.007243	0.011099	0.060665
SOX4	0.004865	-0.007263	-0.006815	-0.009501	0.000535	0.002475	-0.005744	0.007419	0.000140	-0.019449	0.009084	0.024252
SOX5	-0.047423	-0.020359	0.028880	-0.002505	0.008792	0.007610	-0.004371	0.007621	0.028565	-0.003948	-0.006910	0.004049
SOX6	0.007382	-0.010237	-0.041810	0.005556	0.004174	0.013769	0.014140	-0.009653	0.012435	-0.001060	-0.010289	0.015594
SOX7	-0.001215	-0.009561	0.006299	-0.001500	-0.012254	0.009139	0.001098	-0.000758	0.003286	-0.002571	0.017911	-0.009875
SOX8	-0.011942	0.009069	0.000220	-0.000355	-0.015202	-0.012143	0.016497	0.016825	0.012235	-0.001653	0.001642	-0.015191
SOX9	-0.023596	-0.036885	0.005623	-0.041176	0.019319	0.012894	0.017299	0.001675	0.010390	-0.007498	0.009100	0.032855
SP1	0.035796	0.024967	0.004598	0.064583	-0.016315	-0.023591	-0.019232	0.001626	0.017145	-0.003574	-0.064803	-0.021200
SP100	-0.008353	0.009906	-0.014541	0.032461	-0.003987	-0.000047	-0.043178	-0.002994	-0.026246	-0.005715	0.019496	0.043199
SP3	0.001343	-0.001849	0.009648	0.004915	0.005752	-0.007858	0.009777	0.012750	-0.006245	-0.026643	-0.006987	0.005397
SP4_PML	0.012784	0.004739	0.009941	0.006648	-0.003919	-0.001234	-0.006088	-0.000909	0.000302	-0.003636	-0.016511	-0.002116
SPDEF	0.002423	0.008301	0.014218	0.022127	-0.003722	-0.025307	-0.012760	-0.024378	0.009240	-0.005099	-0.009760	0.024718
SPI1	0.040988	0.000934	-0.008269	0.006052	-0.023022	0.033877	-0.006491	0.005218	-0.000912	-0.026046	0.000796	-0.023125
SPIB	-0.015989	0.003710	0.009547	-0.016738	0.006150	0.019675	-0.002907	0.002309	0.001776	0.002191	-0.007679	-0.002044
SPIC	0.005506	0.027069	-0.002804	-0.010272	-0.011094	-0.008843	0.029295	-0.022885	-0.013395	-0.005560	0.014053	-0.001070
SREBF1_TFE3	0.036550	-0.041574	-0.002968	0.028985	0.033245	0.005925	-0.000351	-0.027654	0.005531	-0.033181	-0.002575	-0.001933
SREBF2	0.001858	0.003754	-0.013803	-0.004697	0.015706	-0.005612	0.008168	0.011354	0.005400	-0.000154	-0.008770	-0.013205
SRF	-0.006075	-0.020195	-0.014286	0.007487	-0.002347	0.022636	-0.021115	0.027739	0.001648	0.003202	0.003147	-0.001842
SRY	-0.009943	-0.016227	0.013823	-0.013671	0.008234	0.005641	-0.005397	-0.007681	0.016013	-0.004532	0.003540	0.010200
STAT1_STAT3_BCL6	-0.024591	-0.020421	-0.043566	0.019847	0.004775	0.018285	-0.013680	0.012283	0.021784	0.013663	0.014208	-0.002587
STAT4	0.002542	-0.021587	-0.013258	0.003661	0.002835	0.005887	0.013279	0.004500	0.018346	-0.006359	-0.009260	-0.000585
STAT5A	-0.050314	0.009139	-0.038696	0.002069	-0.026490	0.003938	0.030513	0.005887	0.061703	-0.022007	-0.021417	0.045675
STAT5B	-0.017578	0.008630	0.018092	-0.005469	-0.025534	0.012792	0.001953	0.011369	-0.002305	0.009803	-0.000598	-0.011155
STAT6	0.003133	-0.000620	0.014262	0.013140	-0.007534	0.003944	-0.014362	-0.000647	0.000851	-0.003038	0.002788	-0.011917
T	-0.011879	0.007316	0.004196	0.005143	0.000498	-0.005152	0.002531	0.002588	-0.010108	0.003197	0.011653	-0.009984
TAF1	-0.010762	0.050707	0.003980	0.005404	-0.105777	-0.031702	0.027703	-0.002211	-0.002158	0.006155	-0.006111	0.064772
TAL1	0.018302	0.061482	-0.022268	0.033403	-0.045587	-0.036508	-0.004832	-0.043181	0.033141	-0.024197	0.004468	0.025777
TBP	-0.030618	-0.003182	-0.019835	-0.014770	0.002298	0.015923	0.015537	0.038910	-0.059723	0.005639	0.031968	0.017854
TBX1	0.037010	-0.005202	-0.001393	0.034172	-0.045659	-0.015976	0.035660	-0.055885	0.036303	-0.025711	0.012052	-0.005371
TBX15_MGA	-0.006473	-0.012785	-0.001297	0.007666	-0.008382	0.032151	0.019078	-0.032996	0.011698	-0.002084	0.006966	-0.013542
TBX19	-0.000295	-0.006949	0.006855	-0.007718	0.008964	0.000638	0.003525	-0.002615	-0.008897	0.000341	0.004541	0.001609
TBX2	0.022925	-0.008378	-0.005976	-0.002202	-0.005082	-0.004710	0.016538	-0.002154	-0.013076	-0.013042	0.015202	-0.000044
TBX20	0.003562	0.005676	-0.010848	0.001247	0.003835	-0.012079	-0.010262	0.001602	-0.004286	0.003148	-0.002959	0.021363
TBX21_TBR1	-0.005653	-0.013988	0.006447	0.021687	-0.020079	0.011249	0.019323	-0.007151	0.002003	-0.005064	0.006657	-0.015429
TBX3	0.017027	-0.017962	-0.027859	0.001973	0.002934	0.005291	0.005780	-0.003751	0.019586	-0.006893	0.001966	0.001907
TBX4	-0.003516	-0.005020	0.000808	-0.005068	-0.010373	0.007935	0.012558	-0.001017	0.000746	0.009016	0.002978	-0.009049
TBX5	0.004976	-0.003194	0.007373	0.022572	-0.013793	0.002576	0.005616	-0.024406	-0.007113	0.007203	-0.000376	-0.001435
TCF12_ASCL2	-0.000219	0.039827	0.006413	-0.003749	0.018215	-0.007925	-0.003829	-0.019135	-0.003300	-0.015362	0.000348	-0.011284
TCF21	0.004048	-0.010217	0.010956	0.022003	-0.027749	-0.014974	-0.010785	0.004899	-0.000067	0.017490	0.008430	-0.004033
TCF3_MYOG	-0.012578	0.005341	-0.024305	-0.015060	-0.000852	0.018128	-0.020313	0.005314	0.015975	-0.000490	0.009318	0.019520
TCF7	0.004462	-0.007002	-0.018264	-0.004359	0.002123	0.038647	0.002327	-0.025921	0.011190	-0.003655	-0.010867	0.011321
TCF7L1	-0.012938	-0.003185	-0.001565	0.010650	0.015865	0.004202	-0.020888	-0.025596	0.008066	0.006629	-0.018201	0.036961
TCF7L2	-0.014116	0.007938	-0.000654	-0.013984	0.001296	0.017724	-0.004172	-0.018280	-0.014960	-0.006596	0.014844	0.030961
TEAD3_TEAD1	0.040647	0.009717	-0.018699	-0.039900	-0.017253	-0.028924	0.000524	0.010834	-0.004192	-0.019575	0.032174	0.034648
TEAD4	0.007002	-0.002814	-0.002064	0.010102	-0.010670	0.004759	-0.002453	0.001070	-0.007247	0.004260	0.001058	-0.003004
TFAP2B	0.013870	0.012781	-0.004436	-0.002067	-0.012122	0.000438	-0.007529	-0.031239	-0.003361	-0.022865	0.007263	0.049268
TFAP2C	-0.002690	0.021994	0.049030	-0.006182	-0.021820	-0.022419	0.021955	0.005003	0.021795	-0.060668	0.017012	-0.023008
TFAP2E	-0.003310	-0.008530	-0.006138	0.000027	-0.022298	-0.017874	0.020100	0.001416	0.020023	0.004240	0.005198	0.007146
TFAP4_MSC	-0.003341	0.003995	0.023290	0.016905	-0.033613	0.005388	0.006022	-0.012863	0.014538	-0.027611	0.020425	-0.013136
TFCP2	-0.009976	0.001898	-0.012133	0.002671	-0.009527	-0.015707	0.019456	-0.017847	0.004325	-0.008714	-0.004123	0.049676
TFCP2L1	-0.000846	-0.019190	-0.018688	0.012203	0.004545	-0.009406	-0.014948	0.008250	0.016911	0.026682	0.011136	-0.016649
TFDP1	-0.028947	0.039982	0.010538	0.011503	0.001527	0.012666	-0.021241	0.017076	-0.039155	0.017801	0.008534	-0.030283
TFEC_MITF_ARNTL_BHLHE41	-0.038920	0.008009	0.003225	0.045230	0.032110	0.018198	0.000492	-0.011280	-0.009027	-0.026138	-0.000963	-0.020935
TGIF1	-0.004091	-0.024091	0.006068	-0.001728	-0.002444	0.000959	0.006693	0.001796	0.007933	-0.014886	0.006934	0.016857
THRA_RXRB	-0.002520	0.002562	0.002764	0.029518	-0.010278	0.024887	-0.014935	0.014105	-0.012174	-0.020774	-0.007451	-0.005704
THRB	0.004038	-0.003291	0.001523	-0.008416	-0.006820	0.007871	0.003201	0.003242	-0.005343	-0.003225	0.009953	-0.002734
TLX1_NFIC	-0.023457	0.001382	0.009662	-0.037827	0.000356	-0.003705	0.006772	0.018749	-0.014698	0.000305	0.015081	0.027381
TLX2	-0.011277	0.015995	0.005048	-0.023245	-0.024716	-0.007819	0.040017	0.001437	0.022662	-0.005621	-0.027836	0.015355
TP53	0.043480	-0.015122	0.001945	0.016258	0.001917	-0.005262	0.009292	-0.009631	0.003291	-0.010359	0.011331	-0.047140
TP63	0.007106	-0.010163	-0.007233	-0.024860	0.006408	-0.017111	0.010266	0.001946	0.045424	0.028900	-0.014558	-0.026125
TP73	-0.000708	0.005407	-0.001413	0.000052	0.004506	-0.022029	-0.007201	0.019993	0.008833	-0.002933	-0.004750	0.000245
TWIST1_SNAI1	0.013762	-0.018188	-0.045337	-0.013610	0.026420	0.019756	0.017652	0.000480	-0.007664	-0.029497	0.026098	0.010128
UAAGACG	0.007883	-0.001546	-0.004557	0.001831	-0.006572	0.007329	-0.002897	0.003910	-0.005291	0.002268	0.001168	-0.003525
UAAGACU	0.005564	-0.000710	-0.005149	-0.001078	-0.003857	0.006727	0.003345	0.001985	-0.005824	-0.000004	0.002482	-0.003482
UAAGGCA	0.019329	-0.023512	-0.007429	0.005889	-0.007096	-0.001228	-0.005650	0.014401	-0.010093	0.005190	0.004917	0.005281
UAAUGCU	0.005046	-0.000682	0.014378	-0.000478	-0.011805	-0.010008	0.005812	0.000888	-0.001841	0.001548	-0.000737	-0.002120
UACAGUA	0.008461	-0.002230	-0.003055	0.001539	-0.005984	-0.010144	-0.022912	0.008499	-0.005874	-0.005836	0.028885	0.008651
UAGUGUU	0.021418	0.004694	-0.009780	0.002312	-0.006675	0.011024	-0.003589	-0.018160	0.012943	-0.011060	0.008164	-0.011291
UAUUGCU	-0.003764	0.016479	0.009271	0.014595	0.012847	0.017531	-0.002306	0.005880	-0.011983	-0.017916	-0.011457	-0.029177
UBP1	0.005306	0.000483	-0.013429	-0.009300	-0.018848	0.014642	0.008907	0.010294	-0.004731	-0.004283	0.000522	0.010437
UCACAGU	0.034457	-0.013946	-0.013933	0.008908	0.005769	-0.038502	-0.032082	0.018875	0.007075	0.020769	0.009242	-0.006631
UCACAUU	-0.004081	-0.000012	-0.003865	0.011849	-0.015150	-0.006589	-0.013499	0.010051	-0.015429	0.008216	0.014586	0.013924
UCCAGUU	-0.015436	0.013209	-0.007047	-0.022216	0.000792	0.002882	-0.018615	0.017922	-0.024859	-0.008729	0.031678	0.030420
UCCCUUU	0.008255	-0.010145	0.001369	0.002665	0.007693	-0.001102	0.012252	-0.009287	0.008239	-0.009064	-0.004863	-0.006011
UGAAAUG	0.000765	-0.002513	0.010601	0.005006	-0.006178	-0.002323	0.000402	0.002797	-0.001589	-0.008480	-0.001748	0.003261
UGACAUC	0.006356	0.002273	-0.000488	-0.003734	-0.000999	0.004028	-0.000164	0.004826	-0.001708	-0.003120	-0.008116	0.000845
UGACCUA	0.002518	0.001506	-0.001689	-0.005622	0.002333	-0.003384	0.002019	0.002993	-0.003747	0.002126	-0.003721	0.004667
UGCAGUC	-0.002587	-0.001279	0.011837	-0.002151	-0.014464	-0.000365	0.003948	0.008013	0.004409	0.002087	-0.005034	-0.004414
UGCAUAG	0.027604	-0.020018	0.011111	-0.020533	-0.012075	-0.001676	0.011216	-0.003046	-0.003721	-0.003049	0.019775	-0.005588
UGCAUUG	0.008263	-0.000818	0.005754	-0.004421	-0.009598	-0.005884	0.001801	0.001112	0.002305	0.006179	-0.001354	-0.003339
UGGCACU	0.002808	0.005311	0.017682	0.000734	0.007776	-0.022968	0.007261	-0.002661	-0.009080	-0.007654	-0.010953	0.011745
UGGUCCC	0.001458	-0.005179	0.005296	0.004274	0.013074	-0.017716	0.002402	0.011516	-0.005980	-0.039338	0.012503	0.017690
UGUGCGU	0.000130	-0.001683	-0.001813	0.000236	-0.000925	0.001547	-0.000470	0.002494	-0.000748	0.000579	0.001417	-0.000764
UGUGCUU	-0.008310	0.010531	-0.009710	0.004282	-0.024526	-0.002040	0.004236	0.008559	0.017244	0.003414	0.018772	-0.022452
UUGGCAA	0.013670	0.008282	0.036300	-0.000502	-0.009896	-0.004710	-0.015241	-0.004472	0.007626	-0.027699	-0.006230	0.002871
UUGGCAC	0.016577	0.010485	0.033850	-0.010251	0.005292	-0.017118	-0.001910	-0.004238	0.004002	-0.028269	-0.020565	0.012146
UUGGUCC	0.005570	-0.015246	-0.013137	0.009256	0.019179	-0.006588	-0.009902	0.001252	-0.015208	-0.014102	0.020757	0.018168
UUGUUCG	-0.005541	0.008452	-0.002149	-0.002906	0.004919	0.007232	-0.009680	0.000363	0.011993	-0.001932	-0.008693	-0.002057
UUUUUGC	0.001014	-0.002544	0.002129	-0.000046	0.000116	0.000379	-0.001166	0.001200	-0.001846	0.000425	-0.000489	0.000830
VAX1_GSX2	0.004407	-0.011837	-0.011026	0.009052	-0.010593	-0.011164	0.000164	0.013684	0.001271	-0.014422	0.019675	0.010789
VAX2_RHOXF2	-0.005533	-0.001886	0.001895	-0.003322	-0.002381	-0.006461	0.005863	-0.000022	0.006177	-0.004021	0.002116	0.007576
VDR	0.009844	-0.008760	0.004194	-0.005919	0.021075	-0.002191	0.005878	-0.008429	0.025943	-0.014632	-0.014636	-0.012368
VENTX	-0.007285	0.001007	0.013241	-0.001336	-0.005713	-0.002539	0.002928	0.003951	0.000641	-0.010249	0.015204	-0.009850
VSX1	0.003805	0.026711	-0.031026	-0.005004	0.031156	-0.003592	-0.003564	0.016671	-0.011109	-0.020216	-0.007269	0.003436
WRNIP1	0.034084	-0.025444	-0.015845	-0.020542	-0.000538	-0.022552	0.018321	0.044613	0.035012	0.007539	-0.040070	-0.014577
WT1_MTF1_ZBTB7B	-0.041337	-0.023834	-0.021291	-0.005653	-0.010428	-0.011470	-0.026215	0.004957	0.000131	0.027154	0.034365	0.073622
XBP1	0.033583	0.020776	-0.012434	-0.005548	-0.012466	-0.016091	-0.022182	0.008713	0.040509	-0.007880	-0.024583	-0.002397
YBX1_FOS_NFYC_NFYA_NFYB_CEBPZ	-0.011856	-0.044851	0.038762	0.018513	0.024346	0.010203	-0.010154	0.007220	-0.015836	0.013588	-0.030163	0.000228
YY1_YY2	0.000438	0.036295	-0.036268	0.010379	-0.076928	0.067956	-0.009686	-0.011312	-0.002924	-0.011548	-0.054874	0.088472
ZBED1	0.004450	0.013075	-0.001031	-0.010760	-0.000076	0.007882	-0.002152	-0.008981	-0.003493	0.001158	-0.002502	0.002431
ZBTB12	0.011956	-0.005173	0.012783	-0.008150	-0.001587	-0.014395	0.018459	-0.004207	-0.009617	-0.002597	-0.008735	0.011264
ZBTB14	-0.018539	0.027780	0.029716	0.032202	0.032577	0.000305	-0.028636	-0.027562	-0.033715	-0.015982	-0.015916	0.017771
ZBTB16	-0.014212	0.004273	0.011911	0.011015	0.004250	0.010875	0.026157	-0.011781	-0.022206	0.010385	-0.004725	-0.025942
ZBTB18	0.016216	-0.020457	-0.009579	-0.023959	0.016103	-0.008900	0.012043	-0.019156	0.006902	0.002845	0.001118	0.026823
ZBTB3	0.003959	-0.000108	0.014043	-0.003047	0.004208	-0.013115	-0.012516	0.003260	-0.001407	0.000511	-0.013910	0.018123
ZBTB33_CHD2	0.047881	-0.018041	0.042857	-0.007261	-0.010763	0.017272	0.079925	-0.062476	0.021227	0.001789	-0.057121	-0.055289
ZBTB4	0.005830	-0.011802	-0.003284	-0.009055	0.000815	0.017795	-0.000421	-0.005123	-0.003380	0.010336	-0.000492	-0.001219
ZBTB49	-0.000735	-0.011695	-0.001062	0.011200	0.000968	0.006593	-0.002199	0.011825	-0.007647	0.004482	0.000864	-0.012596
ZBTB6	0.020490	0.029738	0.038863	-0.000859	-0.000087	-0.041998	-0.003822	-0.013933	-0.028399	0.035934	0.013499	-0.049427
ZBTB7A_ZBTB7C	-0.019119	0.021682	0.009053	0.010605	-0.026885	-0.019987	-0.004006	-0.005077	-0.001466	0.013861	-0.002784	0.024124
ZEB1	-0.004520	-0.030577	0.062194	-0.030817	0.008447	-0.010399	-0.032798	0.043645	0.000275	0.020057	-0.029825	0.004316
ZFHX3	0.001238	0.000743	0.000350	0.018191	-0.004001	0.001820	0.000430	-0.000916	-0.002947	-0.002637	-0.000703	-0.011567
ZFX	0.023183	-0.005229	0.050497	0.003890	0.025755	-0.041492	0.027246	0.015569	-0.042450	0.010957	-0.046500	-0.021425
ZIC1	-0.006664	-0.006204	0.019928	0.006148	0.001856	0.007943	-0.005508	0.000399	-0.015629	0.003106	-0.007291	0.001915
ZIC2_GLI1	0.009396	0.003037	0.001929	0.000584	-0.012058	-0.008246	0.003104	-0.004984	-0.008832	-0.009082	0.012038	0.013113
ZIC3_ZIC4	-0.006170	-0.011534	0.013060	0.026060	-0.007385	-0.023777	-0.021524	0.001042	0.029219	-0.011527	-0.021959	0.034493
ZKSCAN1	-0.009275	-0.015139	0.014957	0.004063	-0.004913	0.003161	0.001039	-0.014092	0.006617	-0.000074	0.029328	-0.015672
ZKSCAN3	0.002149	0.000735	0.004394	0.006050	0.007189	-0.003904	-0.000232	-0.000554	-0.011002	-0.005816	-0.000765	0.001756
ZNF143	0.005779	0.002870	0.021313	0.025431	0.049284	-0.011056	-0.010073	-0.005715	-0.040760	-0.028701	-0.025894	0.017521
ZNF148	-0.009546	-0.013226	0.010425	-0.042077	-0.012365	0.021935	0.008811	0.035288	-0.012853	-0.007243	-0.017090	0.037941
ZNF232	-0.000086	0.004248	-0.002983	0.002943	-0.003444	-0.010250	0.007659	-0.001282	-0.003533	-0.000339	-0.004008	0.011076
ZNF263	-0.014445	0.020070	0.021656	-0.009523	-0.024592	0.011423	-0.024031	0.018650	0.007765	0.036784	-0.011711	-0.032046
ZNF274	0.003588	-0.002342	-0.006257	0.007198	0.004761	0.001010	-0.002922	-0.002859	-0.004375	0.001351	0.003999	-0.003153
ZNF282	-0.012661	0.002478	0.022902	0.015457	-0.005020	0.005252	-0.013088	0.014925	-0.013377	0.003498	-0.001680	-0.018686
ZNF333	-0.004025	-0.007981	0.016621	-0.003691	-0.008203	0.002940	-0.007790	0.002862	0.013833	-0.000527	-0.000475	-0.003563
ZNF35	0.006922	-0.005063	0.006471	-0.005331	-0.003434	0.000854	0.002613	-0.000852	-0.005290	0.007915	0.001073	-0.005878
ZNF350	-0.002511	0.001720	0.003429	-0.004239	-0.024077	-0.006546	0.012769	0.008274	0.016897	-0.007171	-0.000936	0.002391
ZNF384	0.001118	-0.023795	-0.046814	-0.014789	0.044721	0.003706	-0.009922	-0.028855	0.007630	-0.025252	0.098816	-0.006565
ZNF410	-0.021282	0.011311	0.006796	0.009746	-0.005363	-0.003173	0.007365	-0.022589	-0.016127	0.012925	0.007110	0.013281
ZNF423	0.006146	-0.010054	0.018135	0.006740	-0.006857	-0.007001	-0.006398	-0.014784	0.000305	0.003239	-0.002987	0.013516
ZNF524	0.002630	0.038846	0.026810	-0.013726	-0.036361	0.065570	-0.015992	0.015324	-0.031979	-0.028008	-0.021995	-0.001119
ZNF652	0.005705	0.013802	0.033776	-0.004441	0.002266	-0.025925	-0.010599	0.024610	-0.013912	-0.000460	-0.001136	-0.023686
ZNF691	0.000216	0.005238	0.015020	-0.000138	-0.008108	-0.004715	0.005337	0.012378	-0.009690	-0.006431	-0.001348	-0.007758
ZNF711_TFAP2A_TFAP2D	0.017616	0.000850	0.003738	0.022075	-0.017861	-0.003820	-0.020537	-0.014687	0.057366	0.016137	-0.022857	-0.038020
ZNF740_ZNF219	-0.003178	-0.004732	-0.014364	-0.036876	0.024015	-0.033055	0.035735	0.004106	0.013589	-0.013788	0.016082	0.012465
ZNF784	0.001177	-0.006564	-0.014085	-0.001294	-0.016439	-0.012503	0.017424	-0.015721	0.017546	-0.000945	0.016013	0.015392
ZNF8	0.012758	-0.011259	0.000356	-0.005346	0.005311	0.003509	-0.009448	0.012353	-0.004583	0.009177	-0.008519	-0.004311
ZSCAN4	0.002280	0.002812	-0.021971	-0.008110	-0.016041	-0.015030	0.000948	0.024405	0.009094	0.002503	0.014961	0.004149
