# Supplementary material for: Analysis of the transcriptome and metabolome of pancreatic spheroids derived from human induced pluripotent stem cells and matured in an organ-on-a-chip
Source: Royal Society of Chemistry journal article supplement (doi:10.1039/d2mo00132b), 2022-07-12
Supplement: d2mo00132b4.xlsx [file d2mo00132b4.xlsx]

## Sheet: Diff_genes_heatmap_PE
Regulation	Ensembl ID	log2 Fold Change	Adj.Pval	Symbol	Chr	Type	Stage1-Ipsc.1	Stage1-Ipsc.2	3D-Petri.1	3D-Petri.2	3D-Petri.3	3D-Petri.4
Up in Petri 3D	ENSG00000161011	3.92694	0.000569	SQSTM1	5q35.3	protein_coding	2.25215	2	3.33754	4.22539	4.24717	4.45791
Up in Petri 3D	ENSG00000175329	3.70299	0.00107	ISX	22q12.3	protein_coding	2	2	3.10125	3.01522	3.42566	4.33479
Up in Petri 3D	ENSG00000197635	3.61732	0.0207	DPP4	2q24.2	protein_coding	2.25215	2.55076	4.57614	4.22539	4.88181	4.74258
Up in Petri 3D	ENSG00000104549	3.55674	0.025	SQLE	8q24.13	protein_coding	2.65347	2	4.26844	4.34621	4.98784	4.10291
Up in Petri 3D	INSIG1	3.50461	0.0294	NA	NANA	NA	2.8188	2	3.8768	4.56117	4.95336	4.64229
Up in Petri 3D	ENSG00000184828	3.50009	0.00312	ZBTB7C	18q21.1	protein_coding	2	2	2.81853	3.69896	3.32135	3.55949
Up in Petri 3D	ENSG00000145824	3.47054	0.00312	CXCL14	5q31.1	protein_coding	2	2	4.01949	3.28078	2.64351	3.94348
Up in Petri 3D	ENSG00000204262	3.45179	0.0337	COL5A2	2q32.2	protein_coding	2.8188	2	4.26844	4.65772	4.12854	4.89563
Up in Petri 3D	ENSG00000166886	3.3888	0.00897	NAB2	12q13.3	protein_coding	2	2	2	2.86154	3.61406	4.64229
Up in Petri 3D	ENSG00000096433	3.374	0.0111	ITPR3	6p21.31	protein_coding	2.25215	2	3.33754	3.69896	2.95373	4.74258
Up in Petri 3D	ENSG00000157064	3.36657	0.00822	NMNAT2	1q25.3	protein_coding	2	2	2.46655	3.01522	3.20891	4.20018
Up in Petri 3D	ENSG00000121769	3.31314	0.0119	FABP3	1p35.2	protein_coding	2	2	2	3.28078	3.85728	3.82648
Up in Petri 3D	ENSG00000081051	3.30756	0.0421	AFP	4q13.3	protein_coding	2.46672	2	4.01949	4.51036	3.78068	3.69915
Up in Petri 3D	ENSG00000147872	3.20706	0.0207	PLIN2	9p22.1	protein_coding	2.25215	2	2.81853	3.50497	3.32135	4.41803
Up in Petri 3D	ENSG00000135346	3.14603	0.0178	CGA	6q14.3	protein_coding	2	2	3.33754	3.1541	2.95373	3.32081
Up in Petri 3D	ENSG00000116133	3.14093	0.025	DHCR24	1p32.3	protein_coding	2.25215	2	2.81853	3.78698	4.12854	3.40483
Up in Petri 3D	ENSG00000166510	3.12573	0.0214	CCDC68	18q21.2	protein_coding	2	2	2.81853	2.49415	2.95373	4.2913
Up in Petri 3D	AC009133.22	3.1220551615061	2.69e-02	NA	NANA	NA	2.25215396818082	2	3.54052613009261	3.15410458734103	3.32134991271924	4.10290868495183
Up in Petri 3D	ENSG00000070019	3.08883	0.0292	GUCY2C	12p12.3	protein_coding	2.25215	2	3.71844	3.69896	3.69977	3.23159
Up in Petri 3D	ENSG00000171867	3.06182	0.0337	PRNP	20p13	protein_coding	2.25215	2	3.54053	3.1541	3.08695	4.20018
Up in Petri 3D	ENSG00000112972	3.01764	5.95e-06	HMGCS1	5p12	protein_coding	3.443	3.92187	5.04513	6.14958	6.17402	6.69309
Up in Petri 3D	ENSG00000109854	2.97658	0.0361	HTATIP2	11p15.1	protein_coding	2	2	3.33754	2.68951	2.64351	3.76422
Up in Petri 3D	ENSG00000175311	2.94573	0.142	ANKS4B	16p12.2	protein_coding	2.46672	2	3.10125	3.28078	3.42566	4.57134
Up in Petri 3D	ENSG00000078114	2.92985	0.142	NEBL	10p12.31	protein_coding	2.46672	2	3.54053	4.02278	3.69977	3.48423
Up in Petri 3D	ENSG00000140465	2.9089	0.153	CYP1A1	15q24.1	protein_coding	2.46672	2	2.81853	3.60523	3.42566	4.37701
Up in Petri 3D	ANK2	2.90624	0.152	NA	NANA	NA	2.46672	2	3.10125	3.86994	3.85728	3.63101
Up in Petri 3D	ENSG00000163536	2.89233	0.0535	SERPINI1	3q26.1	protein_coding	2	2	2.81853	2.86154	2.80694	3.48423
Up in Petri 3D	ENSG00000177380	2.87266	0.052	PPFIA3	19q13.33	protein_coding	2	2	3.33754	3.1541	2.64351	3.13649
Up in Petri 3D	ENSG00000108861	2.87173	0.192	DUSP3	17q21.31	protein_coding	2.65347	2	3.10125	4.16097	3.32135	4.53451
Up in Petri 3D	ENSG00000134324	2.8367	0.093	LPIN1	2p25.1	protein_coding	2.25215	2	2.46655	3.39723	2.95373	4.2913
Up in Petri 3D	ENSG00000120437	2.83634	0.113	ACAT2	6q25.3	protein_coding	2.65347	2.55076	4.14933	4.34621	4.76736	4.60725
Up in Petri 3D	ENSG00000129235	2.83242	0.0879	TXNDC17	17p13.1	protein_coding	2.25215	2	2.81853	3.39723	3.52293	3.48423
Up in Petri 3D	ENSG00000211445	2.82182	0.156	GPX3	5q33.1	protein_coding	3.22459	2	4.48068	3.94838	4.91803	4.57134
Up in Petri 3D	ENSG00000166263	2.79302	0.0787	STXBP4	17q22	protein_coding	2	2	3.10125	3.28078	2.45917	3.23159
Up in Petri 3D	AGT	2.75113860958249	1.05e-01	NA	NANA	NA	2	2	2.46655001006128	3.01522491455995	2.64350930828044	3.4842307625302
Up in Petri 3D	ENSG00000178718	2.75059	0.113	RPP25	15q24.2	protein_coding	2	2	2.46655	2.26813	2.95373	4.10291
Up in Petri 3D	ENSG00000125089	2.72943	0.138	SH3TC1	4p16.1	protein_coding	2	2	2	2.49415	2.95373	4.24646
Up in Petri 3D	ENSG00000128052	2.72346	0.113	KDR	4q12	protein_coding	2	2	2.81853	2.49415	2.80694	3.55949
Up in Petri 3D	ENSG00000259516	2.69864	0.118	ANP32AP1	15q14	transcribed_processed_pseudogene	2	2	2.46655	3.28078	3.32135	2.67737
Up in Petri 3D	ENSG00000050165	2.66832	0.144	DKK3	11p15.3	protein_coding	2.25215	2	3.54053	3.1541	2.80694	3.63101
Up in Petri 3D	ENSG00000112182	2.66163	0.142	BACH2	6q15	protein_coding	2	2	2.46655	3.86994	2.24778	3.32081
Up in Petri 3D	RP11-482H16.1	2.65486779671265	1.44e-01	NA	NANA	NA	2	2	2.81852525167469	2.26812725046979	2.95373005253025	3.63100781821142
Up in Petri 3D	ENSG00000159409	2.63911	0.142	CELF3	1q21.3	protein_coding	2	2	3.54053	3.28078	2	3.94348
Up in Petri 3D	ENSG00000165152	2.62266	0.171	TMEM246	9q31.1	protein_coding	2.25215	2	3.10125	2.49415	3.08695	4.20018
Up in Petri 3D	ENSG00000187678	2.62191	0.158	SPRY4	5q31.3	protein_coding	2	2	2.46655	2.49415	3.08695	3.32081
Up in Petri 3D	ENSG00000159200	2.60499	0.153	RCAN1	21q22.12	protein_coding	2	2	2.81853	3.01522	3.08695	2.67737
Up in Petri 3D	ENSG00000125691	2.59636	0.172	RPL23	17q12	protein_coding	2.25215	2	3.54053	3.1541	2.80694	3.48423
Up in Petri 3D	ENSG00000123240	2.57382	0.158	OPTN	10p13	protein_coding	2	2	3.10125	3.39723	2.80694	2.53548
Up in Petri 3D	FAM126B	2.56066	0.181	NA	NANA	NA	2	2	2.46655	2.68951	3.20891	2.92512
Up in Petri 3D	ENSG00000128564	2.55302	0.179	VGF	7q22.1	protein_coding	2	2	2.81853	3.50497	2.24778	3.13649
Up in Petri 3D	ENSG00000196104	2.46546	0.164	SPOCK3	4q32.3	protein_coding	2.65347	2.94839	4.90509	4.22539	4.30301	4.45791
Up in Petri 3D	ENSG00000079459	2.33923	0.0163	FDFT1	8p23.1	protein_coding	3.87726	2.94839	4.90509	4.91376	5.76066	5.9571
Up in Petri 3D	ENSG00000118271	2.20989	4.01e-14	TTR	18q12.1	protein_coding	5.5712	5.29752	7.14413	7.39414	7.68905	7.79129
Up in Petri 3D	ENSG00000079689	1.90819	0.172	SCGN	6p22.2	protein_coding	3.33792	3.25977	4.74997	4.83336	4.80653	4.80576
Up in Petri 3D	ENSG00000023287	1.77183	0.0148	RB1CC1	8q11.23	protein_coding	4.7505	3.51572	4.97681	5.9732	6.18891	5.99826
Up in Petri 3D	ENSG00000166922	1.74939	0.000429	SCG5	15q13.3	protein_coding	4.83015	4.61198	5.63854	6.0816	6.35664	6.84369
Up in Petri 3D	ENSG00000100664	1.65382	0.148	EIF5	14q32.32	protein_coding	3.22459	4.37398	4.37846	4.45769	5.05443	5.36289
Up in Petri 3D	ENSG00000104763	1.55954	0.153	ASAH1	8p22	protein_coding	3.80024	3.92187	4.57614	4.28707	5.14889	6.05136
Up in Petri 3D	ENSG00000087086	1.516	0.00312	FTL	19q13.33	protein_coding	5.14247	4.49788	6.05778	6.79472	6.34338	6.13984
Up in Petri 3D	ENSG00000115263	1.48303	2.68e-13	GCG	2q24.2	protein_coding	6.31523	6.42315	7.96509	8.12578	7.92979	7.50756
Up in Petri 3D	ENSG00000036565	1.42941	0.162	SLC18A1	8p21.3	protein_coding	4.14982	3.92187	5.54726	5.09711	5.26592	5.38375
Up in Petri 3D	ENSG00000075785	1.29586	0.195	RAB7A	3q21.3	protein_coding	4.70897	3.73304	5.29004	5.25976	5.69955	5.6479
Up in Petri 3D	ENSG00000167088	1.23927	0.0455	SNRPD1	18q11.2	protein_coding	5.04569	4.61198	5.4498	5.79362	6.17402	6.34519
Up in Petri 3D	ENSG00000100316	1.18417	0.153	RPL3	22q13.1	protein_coding	4.6662	4.49788	5.54726	5.51304	5.67859	5.84125
Up in Petri 3D	ENSG00000089199	1.13796	0.0176	CHGB	20p12.3	protein_coding	5.47536	5.07685	6.69025	6.14958	6.74726	6.26876
Up in Petri 3D	ENSG00000184009	0.967574	0.000418	ACTG1	17q25.3	protein_coding	6.5568	5.98872	6.4084	7.73015	7.62476	7.1781
Up in Petri 3D	ENSG00000175582	0.961621	0.151	RAB6A	11q13.4	protein_coding	5.49993	4.81622	5.88214	5.66014	6.18891	6.61587
Up in Petri 3D	ENSG00000144224	0.832352	0.176	UBXN4	2q21.3	protein_coding	5.54783	5.42787	5.80542	5.89613	6.49493	6.59813
Up in Petri 3D	ENSG00000166562	0.809709	0.0568	SEC11C	18q21.32	protein_coding	5.95557	5.85607	6.27251	6.50143	6.38279	7.1959
Up in Petri 3D	RP11-120M18.2	0.787586657393213	1.53e-01	NA	NANA	NA	5.84487533943289	5.54741122829797	5.91901987743649	6.19854959410075	6.30286579620073	7.04695459615787
Up in Petri 3D	ENSG00000251562	0.480427	1.49e-39	MALAT1	11q13.1	lincRNA	8.89516	9.45002	9.62106	9.40167	9.50783	9.49919
Up in Petri 3D	IGFBP2	-4.16184	9.52e-06	NA	NANA	NA	3.63265	3.25977	2	2	2	2
Down in Petri 3D	ENSG00000188488	-4.12977	3.34e-06	SERPINA5	14q32.13	protein_coding	3.71888	4.08882	2	2.26813	2	2
Down in Petri 3D	ENSG00000167653	-4.06129	9.52e-06	PSCA	8q24.3	protein_coding	3.22459	3.92187	2	2	2	2
Down in Petri 3D	ENSG00000196358	-3.99691	0.000117	NTNG2	9q34.13	protein_coding	3.63265	2.94839	2	2	2	2
Down in Petri 3D	ENSG00000066468	-3.8794	0.000139	FGFR2	10q26.13	protein_coding	3.22459	3.51572	2	2	2	2
Down in Petri 3D	ENSG00000080493	-3.74364	0.000227	SLC4A4	4q13.3	protein_coding	4.08635	4.61198	2.81853	2.49415	2	2
Down in Petri 3D	ENSG00000112936	-3.73036	0.00056	C7	5p13.1	protein_coding	3.63265	3.25977	2	2	2.24778	2
Down in Petri 3D	ENSG00000234616	-3.63655	0.00121	JRK	8q24.3	protein_coding	3.87726	3.51572	2	2.26813	2	2.37808
Down in Petri 3D	ENSG00000157570	-3.58994	0.00312	TSPAN18	11p11.2	protein_coding	3.22459	2.94839	2	2	2	2
Down in Petri 3D	ENSG00000163359	-3.4611	0.00537	COL6A3	2q37.3	protein_coding	2.96711	3.25977	2	2	2	2
Down in Petri 3D	ENSG00000169621	-3.4611	0.00537	APLF	2p13.3	protein_coding	2.96711	3.25977	2	2	2	2
Down in Petri 3D	GMDS-AS1	-3.45375	0.00831	NA	NANA	NA	3.10159	2.94839	2	2	2	2
Down in Petri 3D	ENSG00000101680	-3.41112	0.00312	LAMA1	18p11.31	protein_coding	3.22459	3.92187	2	2.49415	2	2
Down in Petri 3D	ENSG00000116117	-3.40663	0.0051	PARD3B	2q33.3	protein_coding	3.54094	3.51572	2	2.86154	2	2
Down in Petri 3D	ENSG00000142949	-3.38821	0.00213	PTPRF	1p34.2	protein_coding	4.325	4.23843	2.46655	2.68951	3.08695	2
Down in Petri 3D	KIRREL	-3.3499	0.00527	NA	NANA	NA	3.87726	3.73304	2.46655	2	2.64351	2
Down in Petri 3D	ENSG00000150867	-3.29514	0.0195	PIP4K2A	10p12.2	protein_coding	2.96711	2.94839	2	2	2	2
Down in Petri 3D	ENSG00000104218	-3.26717	0.0119	CSPP1	8q13.1	protein_coding	3.80024	3.92187	2	2.86154	2.64351	2
Down in Petri 3D	ENSG00000173805	-3.23195	0.0201	HAP1	17q21.2	protein_coding	3.443	2.94839	2	2	2.45917	2
Down in Petri 3D	ENSG00000150687	-3.22487	0.0201	PRSS23	11q14.2	protein_coding	3.63265	2.94839	2	2.26813	2.24778	2
Down in Petri 3D	ENSG00000147257	-3.16623	0.00936	GPC3	Xq26.2	protein_coding	3.33792	4.08882	2.46655	2.26813	2	2
Down in Petri 3D	ENSG00000106484	-3.13713	0.00108	MEST	7q32.2	protein_coding	4.08635	4.90843	3.71844	2.68951	3.08695	2
Down in Petri 3D	ENSG00000140937	-3.10595	0.0467	CDH11	16q21	protein_coding	2.8188	2.94839	2	2	2	2
Down in Petri 3D	ENSG00000151665	-3.10595	0.0467	PIGF	2p21	protein_coding	2.8188	2.94839	2	2	2	2
Down in Petri 3D	ENSG00000269834	-3.10595	0.0467	ZNF528-AS1	19q13.41	processed_transcript	2.8188	2.94839	2	2	2	2
Down in Petri 3D	MRPS17	-3.10595404586232	4.67e-02	NA	NANA	NA	2.81879804550839	2.94838549462566	2	2	2	2
Down in Petri 3D	ENSG00000137831	-3.10267	0.0317	UACA	15q23	protein_coding	3.22459	2.94839	2	2.26813	2	2
Down in Petri 3D	ENSG00000132688	-3.09713	0.0217	NES	1q23.1	protein_coding	2.96711	3.51572	2	2.26813	2	2
Down in Petri 3D	ENSG00000165512	-3.09447	0.0234	ZNF22	10q11.21	protein_coding	3.33792	4.08882	2	2.68951	2.45917	2
Down in Petri 3D	ENSG00000108684	-3.09163	0.0119	ASIC2	17q12	protein_coding	3.80024	4.61198	2	2.26813	2.95373	2.37808
Down in Petri 3D	ENSG00000163945	-3.07728	0.0304	UVSSA	4p16.3	protein_coding	3.443	3.25977	2	2.49415	2.24778	2
Down in Petri 3D	ENSG00000129757	-3.0763	0.0207	CDKN1C	11p15.4	protein_coding	3.80024	3.25977	2.46655	2.49415	2	2
Down in Petri 3D	ENSG00000148677	-3.04427	0.0317	ANKRD1	10q23.31	protein_coding	3.33792	3.73304	2	2.49415	2.45917	2
Down in Petri 3D	ENSG00000110844	-3.03641	0.051	PRPF40B	12q13.12	protein_coding	2.65347	3.25977	2	2	2	2
Down in Petri 3D	ENSG00000126016	-3.03131	0.093	AMOT	Xq23	protein_coding	2.96711	2.55076	2	2	2	2
Down in Petri 3D	ENSG00000171617	-3.03131	0.093	ENC1	5q13.3	protein_coding	2.96711	2.55076	2	2	2	2
Down in Petri 3D	ENSG00000233797	-3.03131	0.093	UFL1-AS1	6q16.1	antisense	2.96711	2.55076	2	2	2	2
Down in Petri 3D	ENSG00000178921	-3.02227	0.05	PFAS	17p13.1	protein_coding	3.10159	2.94839	2	2	2.24778	2
Down in Petri 3D	ENSG00000183666	-3.01365	0.0119	GUSBP1	5p14.3	transcribed_unprocessed_pseudogene	4.14982	4.08882	2.81853	2.49415	2.45917	2.20139
Down in Petri 3D	ACSM3	-2.99342	0.0307	NA	NANA	NA	3.63265	4.08882	2.46655	2.26813	2.24778	2.20139
Down in Petri 3D	ENSG00000047056	-2.97383	0.0471	WDR37	10p15.3	protein_coding	2.96711	3.25977	2	2.26813	2	2
Down in Petri 3D	ENSG00000149571	-2.96206	0.0441	KIRREL3	11q24.2	protein_coding	3.87726	3.51572	2	2	2.64351	2.80656
Down in Petri 3D	ENSG00000106348	-2.96158	0.00897	IMPDH1	7q32.1	protein_coding	4.43099	3.92187	2.46655	3.78698	2.24778	2.20139
Down in Petri 3D	ENSG00000079819	-2.95231	0.0195	EPB41L2	6q23.2	protein_coding	4.14982	3.73304	2.81853	2.86154	2.80694	2
Down in Petri 3D	ENSG00000184903	-2.91083	0.0232	IMMP2L	7q31.1	protein_coding	2.96711	4.81622	2.46655	2	2.45917	2
Down in Petri 3D	ENSG00000110723	-2.90679	0.0549	EXPH5	11q22.3	protein_coding	2.8188	3.51572	2	2.26813	2	2
Down in Petri 3D	ENSG00000126214	-2.89971	0.122	KLC1	14q32.33	protein_coding	3.22459	2.55076	2	2	2.24778	2
Down in Petri 3D	ENSG00000168502	-2.88137	0.0657	MTCL1	18p11.22	protein_coding	2.96711	3.25977	2.46655	2	2	2
Down in Petri 3D	ENSG00000064545	-2.87402	0.0854	TMEM161A	19p13.11	protein_coding	3.10159	2.94839	2.46655	2	2	2
Down in Petri 3D	ENSG00000135315	-2.87374	0.136	CEP162	6q14.3	protein_coding	2.65347	2.94839	2	2	2	2
Down in Petri 3D	ENSG00000213420	-2.87374	0.136	GPC2	7q22.1	protein_coding	2.65347	2.94839	2	2	2	2
Down in Petri 3D	ENSG00000110060	-2.86366	0.106	PUS3	11q24.2	protein_coding	2.96711	2.94839	2	2	2.24778	2
Down in Petri 3D	C12ORF79	-2.85196	0.0769	NA	NANA	NA	2.96711	3.51572	2	2.68951	2	2
Down in Petri 3D	ENSG00000164796	-2.84679	0.109	CSMD3	8q23.3	protein_coding	2.46672	3.51572	2	2	2	2
Down in Petri 3D	ENSG00000100228	-2.83987	0.176	RAB36	22q11.23	protein_coding	2.8188	2.55076	2	2	2	2
Down in Petri 3D	ENSG00000151692	-2.83987	0.176	RNF144A	2p25.1	protein_coding	2.8188	2.55076	2	2	2	2
Down in Petri 3D	ENSG00000187260	-2.83987	0.176	WDR86	7q36.1	protein_coding	2.8188	2.55076	2	2	2	2
Down in Petri 3D	ENSG00000120756	-2.82906	0.0175	PLS1	3q23	protein_coding	3.63265	4.81622	2.81853	2.86154	3.08695	2
Down in Petri 3D	ENSG00000188157	-2.8272	0.0962	AGRN	1p36.33	protein_coding	3.10159	3.25977	2	2.86154	2	2
Down in Petri 3D	ENSG00000143061	-2.80787	0.125	IGSF3	1p13.1	protein_coding	2.96711	2.94839	2	2.26813	2	2
Down in Petri 3D	ENSG00000172137	-2.80787	0.125	CALB2	16q22.2	protein_coding	2.96711	2.94839	2	2.26813	2	2
Down in Petri 3D	ENSG00000269556	-2.78025	0.125	TMEM185A	Xq28	protein_coding	2.96711	3.25977	2	2	2.64351	2
Down in Petri 3D	ENSG00000144560	-2.77688	0.144	VGLL4	3p25.2	protein_coding	3.54094	2.94839	2	2.26813	2.95373	2
Down in Petri 3D	ENSG00000171827	-2.75982	0.183	ZNF570	19q13.12	protein_coding	3.10159	2.55076	2	2	2.24778	2
Down in Petri 3D	ENSG00000119866	-2.73283	0.179	BCL11A	2p16.1	protein_coding	2.46672	3.25977	2	2	2	2
Down in Petri 3D	ENSG00000144736	-2.72571	0.137	SHQ1	3p13	protein_coding	2.65347	3.51572	2	2	2.24778	2
Down in Petri 3D	ENSG00000132382	-2.71541	0.153	MYBBP1A	17p13.2	protein_coding	2.96711	2.94839	2.46655	2	2	2
Down in Petri 3D	ENSG00000188738	-2.71541	0.153	FSIP2	2q32.1	protein_coding	2.96711	2.94839	2.46655	2	2	2
Down in Petri 3D	RP13-188A5	-2.71513	0.171	NA	NANA	NA	2.65347	3.25977	2	2	2	2.20139
Down in Petri 3D	ENSG00000075275	-2.71198	0.176	CELSR1	22q13.31	protein_coding	2.96711	2.94839	2	2	2.45917	2
Down in Petri 3D	ENSG00000102974	-2.71143	0.168	CTCF	16q22.1	protein_coding	3.33792	2.94839	2	2.68951	2	2.20139
Down in Petri 3D	ENSG00000150556	-2.68791	0.0908	LYPD6B	2q23.2	protein_coding	3.10159	4.81622	2.46655	2.26813	2	2.67737
Down in Petri 3D	ENSG00000105793	-2.67447	0.198	GTPBP10	7q21.13	protein_coding	2.8188	2.94839	2	2	2.24778	2
Down in Petri 3D	ENSG00000172922	-2.67447	0.198	RNASEH2C	11q13.1	protein_coding	2.8188	2.94839	2	2	2.24778	2
Down in Petri 3D	ATP5G2	-2.66197	0.162	NA	NANA	NA	3.10159	3.51572	2	2.86154	2.24778	2
Down in Petri 3D	ENSG00000182132	-2.6603	0.0467	KCNIP1	5q35.1	protein_coding	4.01997	3.73304	2.46655	3.01522	3.42566	2
Down in Petri 3D	ENSG00000188153	-2.64631	0.179	COL4A5	Xq22.3	protein_coding	3.71888	2.94839	2.81853	2.26813	2.24778	2
Down in Petri 3D	ENSG00000136237	-2.63741	0.143	RAPGEF5	7p15.3	protein_coding	3.33792	3.25977	2.46655	2.49415	2	2
Down in Petri 3D	ENSG00000115271	-2.62434	0.101	GCA	2q24.2	protein_coding	4.14982	3.25977	2	3.01522	2.80694	2.20139
Down in Petri 3D	ENSG00000139926	-2.62394	0.172	FRMD6	14q22.1	protein_coding	3.33792	2.94839	2.46655	2.26813	2	2
Down in Petri 3D	ENSG00000204138	-2.57963	0.0473	PHACTR4	1p35.3	protein_coding	4.08635	3.73304	2.46655	3.28078	3.52293	2
Down in Petri 3D	ENSG00000077044	-2.555	0.191	DGKD	2q37.1	protein_coding	3.10159	3.25977	2.46655	2	2.24778	2
Down in Petri 3D	ENSG00000152990	-2.555	0.191	ADGRA3	4p15.2	protein_coding	3.10159	3.25977	2.46655	2	2.24778	2
Down in Petri 3D	ENSG00000120694	-2.52774	0.129	HSPH1	13q12.3	protein_coding	3.95038	3.51572	2.46655	2.26813	2.45917	2.53548
Down in Petri 3D	ENSG00000181610	-2.50137	0.187	MRPS23	17q22	protein_coding	3.33792	3.92187	2.46655	2	2.45917	2.53548
Down in Petri 3D	ENSG00000151276	-2.49984	0.00593	MAGI1	3p14.1	protein_coding	4.21061	5.36417	2.46655	3.28078	2.64351	2.92512
Down in Petri 3D	ENSG00000144724	-2.49678	0.136	PTPRG	3p14.2	protein_coding	3.33792	4.49788	2	2.86154	2.45917	2.37808
Down in Petri 3D	ENSG00000130600	-2.49506	0.0705	H19	11p15.5	processed_transcript	4.57666	3.25977	2.46655	2.49415	2.64351	2.67737
Down in Petri 3D	ENSG00000080298	-2.41116	0.0173	RFX3	9p24.2	protein_coding	4.43099	4.23843	2.81853	3.69896	3.20891	2.20139
Down in Petri 3D	ENSG00000173064	-2.36104	0.0212	HECTD4	12q24.13	protein_coding	4.37897	4.23843	3.10125	3.1541	2.95373	2.37808
Down in Petri 3D	ENSG00000177103	-2.33314	0.0475	DSCAML1	11q23.3	protein_coding	3.95038	4.08882	3.71844	3.50497	3.20891	2
Down in Petri 3D	ENSG00000160796	-2.30518	0.0312	NBEAL2	3p21.31	protein_coding	4.37897	4.08882	3.54053	3.39723	2.24778	2.67737
Down in Petri 3D	ENSG00000095981	-2.27232	0.0116	KCNK16	6p21.2	protein_coding	4.62213	4.71771	2.46655	3.1541	3.61406	2.80656
Down in Petri 3D	ENSG00000185046	-2.24824	0.0145	ANKS1B	12q23.1	protein_coding	4.325	4.81622	3.10125	3.28078	3.52293	2.37808
Down in Petri 3D	ENSG00000114554	-2.21608	0.0797	PLXNA1	3q21.3	protein_coding	4.26894	4.08882	2.46655	2.49415	3.08695	2.92512
Down in Petri 3D	ENSG00000189283	-2.17723	0.198	FHIT	3p14.2	protein_coding	3.33792	4.23843	3.71844	3.01522	2.80694	2
Down in Petri 3D	ENSG00000184611	-2.16482	0.0769	KCNH7	2q24.2	protein_coding	3.71888	4.49788	3.54053	3.86994	3.32135	2
Down in Petri 3D	ENSG00000174469	-2.15359	0.176	CNTNAP2	7q35	protein_coding	3.443	4.37398	2.81853	3.28078	3.52293	2
Down in Petri 3D	ENSG00000132780	-2.10029	0.0344	NASP	1p34.1	protein_coding	3.95038	5.15422	2.81853	3.60523	3.32135	2.37808
Down in Petri 3D	ENSG00000102226	-2.0461	0.098	USP11	Xp11.3	protein_coding	3.95038	4.37398	3.33754	3.1541	3.42566	2.20139
Down in Petri 3D	ENSG00000162191	-2.04397	0.0732	UBXN1	11q12.3	protein_coding	4.01997	4.23843	4.01949	4.45769	3.32135	2
Down in Petri 3D	RBM6	-2.0408089988821	2.82e-03	NA	NANA	NA	4.90563090293302	4.99509361951565	4.48068228315724	3.86993721704924	3.69977256430014	2.53547561352526
Down in Petri 3D	ENSG00000140332	-2.03829	0.181	TLE3	15q23	protein_coding	4.08635	3.73304	3.10125	3.1541	2.45917	2.53548
Down in Petri 3D	ENSG00000197321	-1.87719	0.192	SVIL	10p11.23	protein_coding	4.08635	4.23843	2.46655	3.28078	2.80694	2.92512
Down in Petri 3D	ENSG00000179242	-1.86739	0.149	CDH4	20q13.33	protein_coding	4.325	4.08882	3.10125	3.1541	2.80694	2.92512
Down in Petri 3D	ENSG00000196924	-1.84174	0.0207	FLNA	Xq28	protein_coding	5.11092	4.49788	3.10125	3.69896	3.42566	3.48423
Down in Petri 3D	ENSG00000124780	-1.81708	0.198	KCNK17	6p21.2	protein_coding	4.70897	3.51572	2.46655	3.28078	3.32135	2.92512
Down in Petri 3D	ENSG00000170624	-1.81322	0.103	SGCD	5q33.2	protein_coding	4.01997	4.81622	3.54053	3.86994	3.20891	2.37808
Down in Petri 3D	ENSG00000144674	-1.78601	0.0467	GOLGA4	3p22.2	protein_coding	4.83015	4.23843	4.14933	3.60523	3.85728	2.53548
Down in Petri 3D	ENSG00000104067	-1.77821	0.158	TJP1	15q13.1	protein_coding	4.08635	4.37398	3.71844	3.28078	3.42566	2.37808
Down in Petri 3D	ENSG00000164300	-1.77018	0.158	SERINC5	5q14.1	protein_coding	4.14982	4.71771	3.10125	2.26813	2.95373	4.20018
Down in Petri 3D	LARGE	-1.6397	0.0962	NA	NANA	NA	4.52972	4.81622	3.33754	3.28078	3.69977	3.23159
Down in Petri 3D	ENSG00000122786	-1.60417	0.0207	CALD1	7q33	protein_coding	5.29061	4.90843	3.71844	3.39723	3.99928	4.10291
Down in Petri 3D	ENSG00000111057	-1.55772	7.8e-08	KRT18	12q13.13	protein_coding	6.4474	6.75659	4.90509	5.19688	5.14889	5.06014
Down in Petri 3D	ENSG00000109971	-1.39473	0.00276	HSPA8	11q24.1	protein_coding	5.68269	5.90166	5.17278	4.45769	4.68569	4.15236
Down in Petri 3D	ENSG00000167244	-1.38878	5.75e-83	IGF2	11p15.5	protein_coding	8.93848	8.52531	7.98262	7.62661	7.98205	7.05348
Down in Petri 3D	ENSG00000170421	-1.21741	0.0337	KRT8	12q13.13	protein_coding	5.34585	5.90166	4.26844	4.56117	4.55379	4.37701
Down in Petri 3D	ENSG00000115414	-1.2146	0.0173	FN1	2q35	protein_coding	5.90128	5.54741	4.82961	4.56117	4.88181	4.60725
Down in Petri 3D	ENSG00000133026	-0.941175	0.00244	MYH10	17p13.1	protein_coding	6.62539	6.73157	5.2326	5.79362	5.65732	6.05136
Down in Petri 3D	ENSG00000125534	-0.936821	0.00244	PPDPF	20q13.33	protein_coding	6.60289	6.62689	6.18436	5.93518	5.59157	5.52186
Down in Petri 3D	IGF2 INS-IGF2	-0.925358060828476	2.13e-11	IGF2 INS-IGF2			7.66265630986247	7.82737994370677	7.15962531063615	6.81580073553623	7.03798454913815	6.56198604146939
Down in Petri 3D	CERKL NEUROD1	-0.542568433337028	6.27e-02	CERKL NEUROD1			7.04811859475145	7.18305186449514	6.66875868146786	6.53993745984008	6.43370904332042	6.65069956202836
Down in Petri 3D	INS-IGF2 INS	-0.356352946530707	2.07e-02	INS-IGF2 INS			8.02191545526946	8.01536525152198	7.8552016358119	7.67354739945248	7.76060523781915	7.60846380311996
Down in Petri 3D	ENSG00000075624	-0.24017	0.0195	ACTB	7p22.1	protein_coding	8.35715	8.95096	8.13147	8.54724	8.39565	8.08351

## Sheet: GSEA-GOBP
	Direction	Pathways	NES	nGenes	adj.Pval	Genes
854	Up in 3D Petri	Isoprenoid biosynthetic process	2.5383	21	0.028	IDI1 MVK HMGCS1 HMGCR DHDDS SRD5A3 HMGCS2 FDPS PMVK MVD PDSS1 PDSS2 FDFT1 RBP1 RDH10 ALDH1A2 CYP1A1 GGPS1 NUS1 COQ2 BCO1
2265	Up in 3D Petri	Cholesterol homeostasis	2.3342	55	0.028	NR1H4 NR1H3 PLA2G10 LRP5L APOA4 APOC3 APOA1 EPHX2 APOE MTTP CYP39A1 APOA2 ABCG1 LRP5 CYP7B1 APOM HDAC9 TMEM97 NPC2 NPC1 ABCA1 INSIG1 GRAMD1B LIMA1 SOAT1 DGAT2 RORA SCARB1 NFE2L1 APOB SIRT1 XBP1 HNF4A CAV1 MED13 COMMD9 SEC24A NR5A2 FABP3 RALY LDLR SLC37A4 LAMTOR1 NUS1 TTC39B LDLRAP1 LIPC PCSK9 SREBF2 LIPG FGFR4 CD24 ACSM3 MALL ACSM1
1992	Up in 3D Petri	Low-density lipoprotein particle clearance	2.3292	27	0.028	APOC3 ANXA2 NR1H4 PCSK9 ABCC8 DGAT2 SCARB1 CSK LDLR CD36 KHSRP APOB LDLRAP1 HNRNPK CNPY2 AP2B1 AP2S1 SOAT1 HMOX1 LIPA NPC2 CLTA CLTC NPC1 NCEH1 AP2A2 AP2A1
3292	Up in 3D Petri	Sterol homeostasis	2.319	56	0.028	NR1H4 NR1H3 PLA2G10 LRP5L APOA4 APOC3 APOA1 EPHX2 APOE MTTP CYP39A1 APOA2 ABCG1 LRP5 CYP7B1 APOM HDAC9 TMEM97 NPC2 NPC1 ABCA1 INSIG1 GRAMD1B LIMA1 SOAT1 DGAT2 RORA SCARB1 NFE2L1 APOB SIRT1 XBP1 HNF4A ABCD1 CAV1 MED13 COMMD9 SEC24A NR5A2 FABP3 RALY LDLR SLC37A4 LAMTOR1 NUS1 TTC39B LDLRAP1 LIPC PCSK9 SREBF2 LIPG FGFR4 CD24 ACSM3 MALL ACSM1
3693	Up in 3D Petri	Protein-lipid complex subunit organization	2.2352	32	0.028	APOA4 APOA1 APOE APOA2 APOB APOC3 ABCA7 PLTP APOC1 SNX9 MTTP LIPC APOM SCARB1 SH3GL2 PLAGL2 ARF1 ABCA5 ABCG1 SOAT1 LIPG ACSL3 BIN1 ABCA1 DGAT1 AGT AGTR1 PRKACA PRKACB ALB BMP1 P4HB
3294	Up in 3D Petri	Response to lipoprotein particle	2.2268	17	0.029	APOE PPARG CDH13 CASR SMPD3 CD81 HMGCS1 CD36 NPC1 ITGB1 SOCS5 ABCA1 SREBF2 LDLR AKT1 MIA3 MYD88
1991	Up in 3D Petri	Plasma lipoprotein particle clearance	2.2139	40	0.028	MSR1 APOC3 ANXA2 APOA1 NR1H4 SCARB1 APOE APOC1 VLDLR APOA2 LRPAP1 PCSK9 ABCC8 DGAT2 LMF1 CSK LDLR CD36 APOM KHSRP APOB LIPG LDLRAP1 HNRNPK CNPY2 AP2B1 AP2S1 SOAT1 HMOX1 LIPA HDLBP NPC2 CLTA CLTC NPC1 NCEH1 LIPC AMN AP2A2 AP2A1
3821	Up in 3D Petri	Regulation of cholesterol metabolic process	2.2097	50	0.028	LDLRAP1 FGF1 APOE SOD1 DGAT2 SREBF1 ACADVL APOB LMF1 SCAP EPHX2 POR LDLR TTC39B ABCG1 DHCR7 ARV1 GNB3 ERLIN1 DGKQ ERLIN2 ACADL PRKAA1 NFYA MBTPS2 NR1H4 NFYC IDI1 ACACB FDFT1 SCD SQLE KPNB1 SC5D MVK HMGCS1 HMGCR GPAM NFYB RAN MBTPS1 GGPS1 FDPS PMVK MVD FASN ELOVL6 SP1 SREBF2 ACACA
2685	Up in 3D Petri	Neutral lipid catabolic process	2.1792	24	0.028	ABHD5 PNPLA3 APOA4 APOC3 APOA1 APOE DAGLA ABHD2 ABHD6 DAGLB PNPLA2 PNPLA1 MGLL ABHD12 APOA2 LIPC LIPE APOB DDHD2 CPS1 PNPLA4 FABP3 FABP1 FABP5
2687	Up in 3D Petri	Acylglycerol catabolic process	2.1792	24	0.028	ABHD5 PNPLA3 APOA4 APOC3 APOA1 APOE DAGLA ABHD2 ABHD6 DAGLB PNPLA2 PNPLA1 MGLL ABHD12 APOA2 LIPC LIPE APOB DDHD2 CPS1 PNPLA4 FABP3 FABP1 FABP5
3520	Up in 3D Petri	Peptidyl-serine dephosphorylation	2.1342	15	0.052	PPP2R2B PPP2R2D PPP2R2A PPP1R15A YWHAE NCK1 PPP2R1A DUSP1 SWAP70 PPP1R15B PPM1F PPP3CA PPP5C PPP2CB PPP1CA
1988	Up in 3D Petri	Protein-lipid complex remodeling	2.134	17	0.048	APOA4 APOA1 APOE APOA2 APOC3 PLTP APOC1 LIPC APOM SCARB1 ABCA5 ABCG1 APOB LIPG AGT AGTR1 ALB
1989	Up in 3D Petri	Plasma lipoprotein particle remodeling	2.134	17	0.048	APOA4 APOA1 APOE APOA2 APOC3 PLTP APOC1 LIPC APOM SCARB1 ABCA5 ABCG1 APOB LIPG AGT AGTR1 ALB
1356	Up in 3D Petri	Regulation of steroid metabolic process	2.1323	84	0.029	APOA4 APOA1 APOE STAR FGFR4 NFKB1 LDLRAP1 NR1H4 SNAI2 DKK3 CYP27B1 FGF1 BMP2 CGA AGT SOD1 BMP6 APOA2 WNT4 STARD4 DGAT2 DDX20 RORA SREBF1 ACADVL APOB SIRT1 LMF1 PPARGC1A VDR SCAP EGR1 EPHX2 INSIG2 POR LDLR TTC39B KIT ABCG1 ATP1A1 SF1 DHCR7 ARV1 STAT5B INSIG1 GNB3 REST ASAH1 ERLIN1 PROX1 PANK2 AGTR1 DGKQ ERLIN2 LAMTOR1 ACADL PRKAA1 NFYA MBTPS2 NFYC IDI1 ACACB FDFT1 SCD SQLE KPNB1 SC5D MVK HMGCS1 HM…
3641	Up in 3D Petri	Cellular response to lipoprotein particle stimulus	2.1148	19	0.048	APOE PPARG CDH13 ADAM17 CASR SMPD3 CD81 HMGCS1 CD36 NPC1 ITGB1 ABCG1 SOCS5 ABCA1 SREBF2 LDLR AKT1 MIA3 MYD88
1373	Up in 3D Petri	Triglyceride catabolic process	2.1134	18	0.052	ABHD5 PNPLA3 APOA4 APOC3 APOA1 APOE PNPLA2 PNPLA1 LIPC MGLL LIPE APOB DDHD2 CPS1 PNPLA4 FABP3 FABP1 FABP5
2535	Up in 3D Petri	Regulation of cholesterol biosynthetic process	2.1124	38	0.029	FGF1 APOE SOD1 SREBF1 APOB SCAP POR ABCG1 DHCR7 ERLIN1 ERLIN2 PRKAA1 NFYA MBTPS2 NFYC IDI1 ACACB FDFT1 SCD SQLE KPNB1 SC5D MVK HMGCS1 HMGCR GPAM NFYB RAN MBTPS1 GGPS1 FDPS PMVK MVD FASN ELOVL6 SP1 SREBF2 ACACA
3997	Up in 3D Petri	Regulation of sterol biosynthetic process	2.1124	38	0.029	FGF1 APOE SOD1 SREBF1 APOB SCAP POR ABCG1 DHCR7 ERLIN1 ERLIN2 PRKAA1 NFYA MBTPS2 NFYC IDI1 ACACB FDFT1 SCD SQLE KPNB1 SC5D MVK HMGCS1 HMGCR GPAM NFYB RAN MBTPS1 GGPS1 FDPS PMVK MVD FASN ELOVL6 SP1 SREBF2 ACACA
3695	Up in 3D Petri	Plasma lipoprotein particle organization	2.105	29	0.037	APOA4 APOA1 APOE APOA2 APOB APOC3 ABCA7 PLTP APOC1 MTTP LIPC APOM SCARB1 PLAGL2 ARF1 ABCA5 ABCG1 SOAT1 LIPG ACSL3 ABCA1 DGAT1 AGT AGTR1 PRKACA PRKACB ALB BMP1 P4HB
2982	Up in 3D Petri	Regulation of steroid biosynthetic process	2.0947	63	0.028	STAR FGFR4 NFKB1 NR1H4 SNAI2 DKK3 CYP27B1 FGF1 BMP2 APOE CGA SOD1 BMP6 WNT4 STARD4 DDX20 SREBF1 APOB SIRT1 PPARGC1A VDR SCAP EGR1 INSIG2 POR ABCG1 ATP1A1 SF1 DHCR7 INSIG1 REST ASAH1 ERLIN1 PROX1 DGKQ ERLIN2 PRKAA1 NFYA MBTPS2 NFYC IDI1 ACACB FDFT1 SCD SQLE KPNB1 SC5D MVK HMGCS1 HMGCR GPAM NFYB RAN MBTPS1 GGPS1 FDPS PMVK MVD FASN ELOVL6 SP1 SREBF2 ACACA
841	Up in 3D Petri	Cholesterol metabolic process	2.0751	107	0.035	CYP46A1 SOAT1 FDFT1 SQLE SC5D APOA4 MVK APOA1 APOE HSD17B7 EBP NSDHL APOA2 PMVK DHCR7 LDLRAP1 HMGCR FGF1 AKR1D1 CYP27A1 FDX1 SOD1 LBR ABCG1 ABCA1 GBA CFTR MBTPS2 NPC1L1 LIMA1 DGAT2 IDI1 GBA2 SREBF1 ACADVL SCARB1 LIPE NFE2L1 APOB CYB5R3 LMF1 ERLIN1 HMGCS1 SCAP HDLBP DHCR24 NPC2 EPHX2 CAT INSIG2 POR LDLR APOC1 PRKAA1 HMGCS2 HNF1A MBTPS1 NPC1 APP CYP39A1 STAR ERLIN2 VLDLR TTC39B FDPS FDXR PRKAA2 LIP…
4185	Up in 3D Petri	Secondary alcohol metabolic process	2.0742	110	0.035	CYP46A1 SOAT1 FDFT1 SQLE SC5D APOA4 MVK APOA1 APOE HSD17B7 EBP NSDHL APOA2 PMVK DHCR7 LDLRAP1 CYP27B1 HMGCR FGF1 AKR1D1 CYP27A1 FDX1 SOD1 LBR ABCG1 ABCA1 GBA CYP2R1 CFTR MBTPS2 NPC1L1 LIMA1 DGAT2 IDI1 GBA2 SREBF1 ACADVL SCARB1 FGFR1 LIPE NFE2L1 APOB CYB5R3 LMF1 ERLIN1 HMGCS1 SCAP HDLBP DHCR24 NPC2 EPHX2 CAT INSIG2 POR LDLR APOC1 PRKAA1 HMGCS2 HNF1A MBTPS1 NPC1 APP CYP39A1 STAR ERLIN2 VLDLR TTC39B…
3868	Up in 3D Petri	Regulation of plasma lipoprotein particle levels	2.0665	59	0.028	MSR1 APOA4 APOC3 APOA1 APOE APOA2 ANXA2 APOB NR1H4 ABCA7 SCARB1 PLTP APOC1 MTTP VLDLR LRPAP1 LIPC PCSK9 APOM ABCC8 DGAT2 LMF1 CSK LPCAT3 PLAGL2 LDLR CD36 ARF1 ABCA5 ABCG1 KHSRP SOAT1 LIPG ACSL3 LDLRAP1 ABCA1 HNRNPK DGAT1 CNPY2 AGT AGTR1 AP2B1 AP2S1 PRKACA HMOX1 LIPA HDLBP NPC2 CLTA CLTC NPC1 PRKACB NCEH1 ALB AMN BMP1 AP2A2 P4HB AP2A1
2762	Up in 3D Petri	Regulation of lipid biosynthetic process	2.0624	127	0.037	BRCA1 APOA4 APOA1 ORMDL2 ORMDL1 APOE SLC27A1 IDH1 STAR FGFR4 ORMDL3 NFKB1 FABP3 NR1H4 SNAI2 DKK3 PIBF1 PDGFB APOC3 CYP27B1 FGF1 BMP2 APOC1 CGA SOD1 BMP6 SAMD8 WNT4 STARD4 PDGFA PDK4 MLXIPL DGAT2 DDX20 FAM3A SREBF1 ACADVL SCARB1 APOB SIRT1 TRIB3 ABCD1 PPARGC1A VDR SCAP CREB1 EGR1 RDH10 RAB38 INSIG2 POR LDLR RGN CDK4 WDTC1 CCDC3 LPCAT1 ABCG1 CAPN2 ATP1A1 ABHD6 FABP5 MID1IP1 SF1 DHCR7 ZBTB20 PLA2G6 …
619	Up in 3D Petri	Cellular iron ion homeostasis	2.0374	47	0.028	FTL GLRX3 ABCB7 NDFIP1 ISCU IREB2 FXN FTH1 HFE MYC TTC7A TFRC HEPH TF HIF1A HPX SLC11A2 ACO1 EGLN1 SMAD4 SOD1 BMP6 TMPRSS6 NCOA4 ATP6AP1 HMOX1 NUBP1 ATP6V1A CCDC115 ATP6V1G1 SLC40A1 ATP13A2 ATP6V0D1 ATP6V0A2 TMEM199 CUL1 CYBRD1 SRI SLC46A1 SLC22A17 HMOX2 CAND1 SKP1 FBXL5 ABCG2 NEDD8 FLVCR1
2733	Up in 3D Petri	Response to copper ion	1.9884	25	0.085	MT2A IREB2 MT1E AOC1 ATP7B LOXL2 SNCA PRNP HSF1 DAXX NFE2L1 MAP1LC3A NFE2L2 PARK7 BECN1 SORD CYP1A1 SOD1 APP PAM ATP7A CDK1 BACE1 MT-CYB MT-CO1
3290	Up in 3D Petri	Lipid homeostasis	1.9692	97	0.033	ABHD5 NR1H4 NR1H3 PLA2G10 ACOX3 LRP5L PNPLA3 ABHD4 APOA4 APOC3 APOA1 EPHX2 ORMDL2 ORMDL1 APOE MTTP CYP39A1 ACOXL APOA2 ABCG1 ACOX1 LRP5 ACOX2 ORMDL3 CYP7B1 PNPLA2 PNPLA1 APOM ABCB4 HDAC9 TMEM97 NPC2 NPC1 ABCA1 INSIG1 GRAMD1B LIMA1 SOAT1 DGAT2 RORA SCARB1 NFE2L1 APOB SIRT1 XBP1 HNF4A ABCD1 USF2 CAV1 MED13 COMMD9 COL4A3BP SEC24A RTN4 NR5A2 GOT1 FABP3 RALY LDLR SESN2 PRKAA1 SLC37A4 RCN3 ABCA12 LAMTO…
4213	Up in 3D Petri	Regulation of alcohol biosynthetic process	1.9645	51	0.028	DKK3 NFKB1 CYP27B1 FGF1 BMP2 APOE SOD1 SNCA BMP6 WNT4 SREBF1 APOB VDR SCAP PTK2B POR ABCG1 P2RY1 DHCR7 REST ERLIN1 DGKQ ERLIN2 HRH1 PRKAA1 NFYA MBTPS2 NFYC IDI1 ACACB FDFT1 SCD SQLE KPNB1 SC5D MVK HMGCS1 HMGCR GPAM NFYB RAN MBTPS1 GGPS1 FDPS PMVK MVD FASN ELOVL6 SP1 SREBF2 ACACA
572	Up in 3D Petri	Cholesterol biosynthetic process	1.9625	59	0.028	FDFT1 SC5D APOA4 MVK APOA1 APOE HSD17B7 EBP PMVK DHCR7 HMGCR FGF1 SOD1 LBR CFTR IDI1 SREBF1 APOB CYB5R3 HMGCS1 SCAP DHCR24 INSIG2 POR PRKAA1 HMGCS2 NSDHL ABCG1 FDPS PRKAA2 MVD INSIG1 NPC1L1 ERLIN1 ERLIN2 G6PD ACAA2 NFYA MBTPS2 MSMO1 NFYC ACACB SCD SQLE KPNB1 GPAM ACAT2 NFYB ACLY RAN MBTPS1 GGPS1 FASN CNBP ELOVL6 ARV1 SP1 SREBF2 ACACA
4186	Up in 3D Petri	Secondary alcohol biosynthetic process	1.9625	59	0.028	FDFT1 SC5D APOA4 MVK APOA1 APOE HSD17B7 EBP PMVK DHCR7 HMGCR FGF1 SOD1 LBR CFTR IDI1 SREBF1 APOB CYB5R3 HMGCS1 SCAP DHCR24 INSIG2 POR PRKAA1 HMGCS2 NSDHL ABCG1 FDPS PRKAA2 MVD INSIG1 NPC1L1 ERLIN1 ERLIN2 G6PD ACAA2 NFYA MBTPS2 MSMO1 NFYC ACACB SCD SQLE KPNB1 GPAM ACAT2 NFYB ACLY RAN MBTPS1 GGPS1 FASN CNBP ELOVL6 ARV1 SP1 SREBF2 ACACA

## Sheet: GSEA-GOKEGG
	Direction	Pathways	NES	nGenes	adj.Pval	Genes
3	in 3D Petri	Pentose phosphate pathway	-1.5909	19	0.18	ALDOA ALDOB RPIA G6PD IDNK DERA PFKL PFKM PFKP PGD PGM1 PGM2 PRPS1 PRPS2 RPE RBKS TKT RPEL1 RGN
133	in 3D Petri	ECM-receptor interaction	-1.5386	50	0.15	COL1A1 COL1A2 COL2A1 COL4A1 COL4A2 COL4A4 COL4A5 COL4A6 COL6A1 COL6A2 COL6A3 COL9A2 COL9A3 COL6A6 DAG1 SV2C FN1 LAMA1 HMMR HSPG2 ITGA6 ITGA1 ITGA3 ITGA5 ITGA7 ITGA9 ITGAV ITGB1 ITGB5 ITGB6 ITGB8 AGRN LAMA2 LAMA3 LAMA5 LAMB1 LAMB2 LAMC1 LAMC2 RELN SDC4 SPP1 THBS1 THBS3 TNR VTN CD36 CD44 CD47 SV2B
69	in 3D Petri	Basal transcription factors	-1.483	30	0.31	TAF6L TAF8 ERCC2 ERCC3 TAF5L GTF2A1 GTF2B GTF2E1 GTF2E2 GTF2F1 GTF2F2 GTF2H1 GTF2H3 TBPL2 GTF2H5 MNAT1 TAF9B TAF2 TAF4B TAF5 TAF6 TAF7 TAF10 TAF11 TAF12 TAF13 TBP TAF3 CCNH TBPL1
266	in 3D Petri	Small cell lung cancer	-1.4818	76	0.15	CDK2 CDK4 CDK6 CDKN1A CDKN1B CDKN2B LAMC3 CHUK CKS1B COL4A1 COL4A2 COL4A4 COL4A5 COL4A6 DDB2 GADD45A E2F1 E2F3 AKT1 AKT2 FHIT FN1 LAMA1 APAF1 BIRC2 BIRC3 XIAP IKBKB ITGA6 ITGA3 ITGAV ITGB1 LAMA2 LAMA3 LAMA5 LAMB1 LAMB2 LAMC1 LAMC2 MAX MYC GADD45B NFKB1 NFKBIA POLK PIK3CA PIK3CB PIK3CD PIK3R1 PIK3R2 CYCS PTEN PTK2 BAK1 BAX RARB RB1 CCND1 BCL2 RELA BCL2L1 RXRA RXRB RXRG SKP2 TP53 TRAF3 TRAF5 TRAF6 …
245	in 3D Petri	Herpes simplex virus 1 infection	-1.4776	337	0.011	ZNF730 ZNF316 ZNF717 ZNF605 ZNF783 ZNF891 ZNF256 ALYREF ZNF267 TAB1 NXF1 ZNF234 ZNF273 ZNF460 ZNF268 ZNF275 SRSF8 ZNF257 CHUK ZNF689 ZNF354B ZNF641 ZNF543 ZNF813 ZNF440 ZNF57 ZNF684 ZNF786 ZFP28 ZFP90 ZNF597 ZNF480 ZNF418 ZNF417 ZNF420 ZNF565 ZNF582 ZNF583 ZNF558 ZNF714 ZNF569 ZNF570 ZNF595 ZNF425 ZNF746 ZNF782 DAXX ZFP1 ZNF519 ZNF610 ZNF600 ZNF468 ZNF846 ZNF791 ZNF567 ZNF383 ZNF780B ZNF540 ZNF59…
124	in 3D Petri	Hedgehog signaling pathway	-1.4433	33	0.33	KIF3A EVC2 CSNK1A1 CSNK1D CSNK1E CSNK1G2 CSNK1G3 EVC FBXW11 GPR161 GLI3 GSK3B SPOPL KIF7 LRP2 ARRB1 ARRB2 CDON SUFU CSNK1G1 PRKACA PRKACB PTCH1 CCND1 BCL2 SMURF2 SMO SPOP CUL3 CUL1 PTCH2 CCND2 BTRC
210	Up in 3D Petri	Fat digestion and absorption	2.2816	18	0.012	AGPAT2 SLC27A4 ABCA1 FABP1 GOT2 NPC1L1 APOA1 APOA4 APOB ACAT2 MTTP PLA2G3 PLA2G12A PLA2G10 PLA2G12B DGAT2 DGAT1 CD36
47	Up in 3D Petri	Terpenoid backbone biosynthesis	2.2528	17	0.021	PMVK NUS1 FDPS FNTA ICMT PDSS1 HMGCR HMGCS1 HMGCS2 IDI1 ACAT1 ACAT2 MVD MVK PDSS2 DHDDS GGPS1
212	Up in 3D Petri	Mineral absorption	2.0663	26	0.021	SLC46A1 SLC31A1 SLC26A3 FTH1 FTL STEAP2 SLC40A1 HMOX1 SLC6A19 MT1E MT2A ATOX1 ATP1A1 ATP1A3 ATP1B1 ATP1B3 SLC11A2 ATP2B1 ATP7A TRPM7 SLC26A6 SLC8A1 TF VDR SLC30A1 CYBRD1
20	Up in 3D Petri	Tryptophan metabolism	1.9171	26	0.04	AFMID CYP1A1 CYP1B1 DDC DLD DLST ECHS1 ALDH2 ALDH1B1 ALDH9A1 ALDH3A2 HAAO AOC1 GCDH HADHA HADH AOX1 ACAT1 ACAT2 MAOA MAOB ALDH7A1 AADAT DHTKD1 TPH1 CAT
213	Up in 3D Petri	Cholesterol metabolism	1.9091	32	0.036	STARD3 CYP27A1 ABCA1 PCSK9 LDLRAP1 APOA1 APOA2 APOA4 APOB APOC1 APOC3 APOE LDLR LIPA LIPC LRP1 LRP2 LRPAP1 NPC1 ANGPTL4 PLTP NCEH1 SORT1 SOAT1 STAR VDAC1 VDAC2 VDAC3 VAPB VAPA LIPG CD36
74	Up in 3D Petri	PPAR signaling pathway	1.8857	46	0.021	SORBS1 SLC27A5 SLC27A4 SLC27A2 PLIN2 CPT1C CPT1A CPT2 CYP27A1 DBI FABP1 FABP3 FABP5 ACSL1 ACSL3 ACSL4 ACAA1 HMGCS2 ACADL APOA1 APOA2 ACADM APOC3 ILK AQP7 SLC27A1 ME1 ACOX1 PCK2 ANGPTL4 PDPK1 PLTP PPARA PPARD PPARG RXRA RXRB RXRG SCD SCP2 PLIN4 UBC SCD5 ACOX2 ACOX3 FADS2
7	Up in 3D Petri	Fatty acid elongation	1.8072	18	0.12	ACOT7 THEM4 ECHS1 HACD2 HADHA HADHB HADH MECR HSD17B12 HACD3 ELOVL2 PPT1 ELOVL5 ELOVL1 ELOVL4 ELOVL6 ELOVL7 HACD1
107	Up in 3D Petri	Phagosome	1.7522	83	0.021	CLEC4M TUBA1B TUBB3 TUBB4A TUBB4B SEC61B CORO1A CTSL CYBA ATP6V0E2 DYNC1H1 DYNC1I1 DYNC1I2 DYNC1LI2 PIKFYVE TUBB PLA2R1 SEC61G ATP6V0A2 STX12 ATP6V0D2 ATP6V1C2 SEC61A1 HLA-C TUBB2B ITGA5 ITGAV ITGB1 ITGB5 LAMP1 LAMP2 M6PR MRC1 MSR1 DYNC1LI1 ATP6V1D ATP6V1H ATP6V1A ATP6V1B1 ATP6V1B2 ATP6V1C1 PIK3C3 ATP6V1E1 ATP6V0B ATP6V1G2 STX18 ATP6V0A1 ATP6AP1 SEC61A2 RAB5A RAB5B RAB5C RAC1 ACTB NCF1 TFRC THBS1…
56	Up in 3D Petri	Fatty acid metabolism	1.7216	41	0.06	CPT1C CPT1A CPT2 ECHS1 HACD2 ACSL1 ACSL3 ACSL4 FASN MCAT ACAA1 HADHA HADHB HADH HSD17B4 ACADL ACADM ACADS ACADSB ACADVL ACAT1 ACAT2 FADS1 ACOX1 MECR HSD17B12 HACD3 ELOVL2 OXSM PPT1 ELOVL5 SCD SCP2 ELOVL1 ELOVL4 ELOVL6 SCD5 ELOVL7 ACOX3 HACD1 FADS2
8	Up in 3D Petri	Fatty acid degradation	1.6484	28	0.15	ECI2 CPT1C ADH5 ADH6 CPT1A CPT2 ECHS1 ALDH2 ACSL1 ACSL3 ACSL4 ALDH1B1 ALDH9A1 ALDH3A2 GCDH ACAA1 HADHA HADHB HADH ACADL ACADM ACADS ACADSB ACADVL ACAT1 ACAT2 ALDH7A1 ACOX1
117	Up in 3D Petri	Necroptosis	1.6457	96	0.025	PARP2 RNF103-CHMP3 DNM1L RBCK1 FAF1 SPATA2L CHMP4B PARP1 PARP4 CYLD ALOX15 FTH1 FTL CHMP2B USP21 VPS4A CHMP2A GLUD1 GLUD2 GLUL SLC25A4 PYCARD SLC25A5 HIST1H2AE H2AFX H2AFZ HMGB1 BIRC2 BIRC3 XIAP HSP90AA1 HSP90AB1 IFNAR1 IFNAR2 IFNGR1 IFNGR2 JAK1 JAK2 CHMP1A CHMP5 CHMP3 PLA2G4A PPIA PPID TRPM7 RNF31 H2AFY2 H2AFJ MAPK8 MAPK9 MAPK10 EIF2AK2 BAX PYGB BCL2 BID SMPD1 STAT1 STAT2 STAT3 STAT4 STAT5B STAT…
129	Up in 3D Petri	Osteoclast differentiation	1.5829	74	0.059	TAB1 CHUK CREB1 SIRPA MAPK14 CTSK CYBA CYLD AKT1 AKT2 FHL2 TAB2 FOS FOSL2 FYN GRB2 IFNAR1 IFNAR2 IFNGR1 IFNGR2 IKBKB IL1R1 JAK1 JUN JUNB JUND MITF NFATC2 NFKB1 NFKB2 NFKBIA TNFRSF11B PIK3CA PIK3CB PIK3CD PIK3R1 PIK3R2 PLCG2 PPARG PPP3CA PPP3CB PPP3CC MAPK1 MAPK3 MAPK8 MAPK11 MAPK9 MAPK10 MAPK13 MAP2K1 MAP2K6 MAP2K7 RAC1 RELA RELB MAPK12 NCF1 STAT1 STAT2 MAP3K7 TEC TGFB2 TGFBR1 TGFBR2 TNFRSF1A TRA…
168	Up in 3D Petri	Serotonergic synapse	1.53	63	0.11	GNB5 ADCY5 CYP2J2 DDC DUSP1 PLCB1 ALOX15 GABRB1 GABRB2 GABRB3 GNAI1 GNAI2 GNAI3 GNAO1 GNAQ GNAS GNB1 GNB2 GNB3 GNG3 GNG4 GNG5 GNG7 HRAS APP ARAF ITPR1 ITPR2 ITPR3 KCND2 KCNJ3 KCNJ6 KRAS MAOA MAOB NRAS PLA2G4A PLCB3 PLCB4 GNG2 PRKACA PRKACB PRKCA PRKCB MAPK1 MAPK3 GNG12 MAP2K1 RAF1 GNB4 SLC6A4 SLC18A1 SLC18A2 BRAF TPH1 TRPC1 CACNA1A CACNA1B CACNA1C CACNA1D CACNA1F CASP3 PLA2G4C
170	Up in 3D Petri	Dopaminergic synapse	1.5171	99	0.059	CREB3 GNB5 ADCY5 COMT CREB1 ATF2 MAPK14 CREB3L4 DDC DRD2 AKT1 AKT2 LRTOMT PLCB1 FOS GNAI1 GNAI2 GNAI3 GNAL GNAO1 GNAQ GNAS GNB1 GNB2 GNB3 GNG3 GNG4 GNG5 GNG7 GRIA2 GRIA3 GRIA4 GRIN2A GSK3A GSK3B ITPR1 ITPR2 ITPR3 KCNJ3 KCNJ6 KIF5A KIF5B ARNTL ARRB2 MAOA MAOB ATF4 CALY PLCB3 PLCB4 GNG2 PPP1CA PPP1CB PPP1CC PPP2R3C PPP2CB PPP2R1A PPP2R1B PPP2R2A PPP2R2B PPP2R3A PPP2R5A PPP2R5B PPP2R5C PPP2R5D PPP2R…
52	Up in 3D Petri	Biosynthesis of unsaturated fatty acids	1.5035	20	0.34	ACOT7 HACD2 ACAA1 HSD17B4 FADS1 ACOX1 HSD17B12 HACD3 ELOVL2 ELOVL5 SCD SCP2 ELOVL1 ELOVL4 ELOVL6 SCD5 ELOVL7 ACOX3 HACD1 FADS2
42	Up in 3D Petri	Butanoate metabolism	1.4715	18	0.4	ABAT ECHS1 GAD1 GAD2 HADHA HADH HMGCL HMGCS1 HMGCS2 ACADS ACAT1 ACAT2 OXCT1 HMGCLL1 BDH2 ACSM3 AACS ALDH5A1
184	Up in 3D Petri	Thyroid hormone synthesis	1.4617	48	0.24	ADCY1 ADCY2 CGA ADCY3 ADCY5 ADCY6 ADCY8 ADCY9 CREB1 ATF2 CREB3L4 ALB PLCB1 GNAQ GNAS GPX3 GPX7 GSR HSPA5 ITPR1 ITPR2 ITPR3 LRP2 ASGR1 ASGR2 ATF4 ATP1A1 ATP1A3 ATP1B1 ATP1B3 GPX8 DUOX2 PLCB3 PLCB4 PRKACA PRKACB PRKCA PRKCB CREB3L2 TG HSP90B1 TTF1 TTR CANX TTF2 CREB3L3 CREB3L1 CREB5
108	Up in 3D Petri	Peroxisome	1.4585	59	0.18	ECI2 SLC25A17 PMVK DHRS4 SLC27A2 CRAT ECH1 PAOX EPHX2 ABCD1 ACSL1 ACSL3 ACSL4 MLYCD PRDX5 HACL1 NUDT7 ACAA1 HMGCL HSD17B4 IDH1 IDH2 NUDT19 MPV17 MVK PRDX1 ACOX1 PIPOX PEX5L PEX6 PEX7 PEX10 PEX13 PEX14 PHYH HMGCLL1 CROT PEX26 PECR PEX19 ABCD3 ABCD4 PXMP2 PEX2 PEX5 SCP2 SOD1 XDH ACOX2 ACOX3 NUDT12 FAR1 GNPAT CAT MPV17L2 PEX3 AGPS PEX11B PEX11A
22	Up in 3D Petri	Glutathione metabolism	1.4582	33	0.33	G6PD GGT7 OPLAH GCLC GCLM GPX3 GPX4 GPX7 ANPEP GSR GSS GSTA1 GSTA2 GSTA4 GSTM3 GSTM4 GSTP1 IDH1 IDH2 MGST1 MGST2 MGST3 GPX8 ODC1 RRM2B LAP3 TXNDC12 PGD RRM1 RRM2 SMS SRM GGCT
31	Up in 3D Petri	Glycerolipid metabolism	1.4501	34	0.33	AGPAT2 MGLL MBOAT2 GLYCTK DGKK DGKA DGKB DGKG DGKH DGKQ ALDH2 ALDH1B1 ALDH9A1 ALDH3A2 AKR1B1 LPIN1 LCLAT1 GLA LIPC ALDH7A1 AGPAT5 AGPAT3 AGPAT4 AKR1B10 PNPLA2 GPAM LPIN3 PNPLA3 DGAT2 DGKZ DGKE DGKD DGAT1 LIPG
220	Up in 3D Petri	Amphetamine addiction	1.4484	44	0.28	ADCY5 GRIN3A CREB1 ATF2 CREB3L4 DDC ARC SIRT1 FOS GNAS GRIA2 GRIA3 GRIA4 GRIN2A HDAC1 JUN MAOA MAOB ATF4 PPP1CA PPP1CB PPP1CC PPP3CA PPP3CB PPP3CC PRKACA PRKACB PRKCA PRKCB CREB3L2 SLC18A1 SLC18A2 STX1A CACNA1C CACNA1D CALM1 CALM2 CALM3 CAMK2B CAMK2D CAMK2G CREB3L3 CREB3L1 CALML4
45	Up in 3D Petri	Retinol metabolism	1.4479	24	0.37	UGT2B11 DHRS4 ADH5 ADH6 RDH12 CYP1A1 RDH10 CYP3A5 SDR16C5 ALDH1A1 CYP2S1 AOX1 DHRS4L2 RDH11 BCO1 RETSAT CYP26B1 UGT2B4 UGT2B7 UGT2A3 PNPLA4 DGAT1 ALDH1A2 LRAT
193	Up in 3D Petri	Cortisol synthesis and secretion	1.4367	43	0.31	ADCY1 ADCY2 ADCY3 ADCY5 ADCY6 ADCY8 ADCY9 CREB1 ATF2 CREB3L4 AGT AGTR1 NR0B1 PLCB1 GNA11 GNAQ GNAS NR4A1 ITPR1 ITPR2 ITPR3 LDLR ATF4 PBX1 PDE8A PLCB3 PLCB4 POMC PRKACA PRKACB NCEH1 CREB3L2 SP1 STAR CACNA1C CACNA1D CACNA1F CREB3L3 ORAI1 CACNA1H CACNA1G CREB3L1 SCARB1
223	Up in 3D Petri	Alcoholism	1.4342	96	0.12	HDAC5 CREB3 CAMKK2 GNB5 ADCY5 GRIN3A CREB1 ATF2 CRH CREB3L4 DDC DRD2 SLC29A1 SHC2 GNAI1 GNAI2 GNAI3 GNAO1 GNAS GNB1 GNB2 GNB3 GNG3 GNG4 GNG5 GNG7 GRB2 GRIN2A HIST1H2AE H2AFX H2AFZ HIST1H2BD HIST1H2BB H3F3A H3F3B HDAC1 HDAC2 HRAS ARAF KRAS SHC4 MAOA MAOB H3F3C ATF4 NPY NRAS HDAC7 SHC3 GNG2 PPP1CA PPP1CB PPP1CC H2AFY2 PRKACA PKIA H2AFJ HDAC8 MAPK1 MAPK3 GNG12 MAP2K1 RAF1 GNB4 BDNF SHC1 CREB3L2 SLC1…

## Sheet: GSEA-GOMLF
	Direction	Pathways	NES	nGenes	adj.Pval	Genes
295	Down in 3D Petri	Potassium channel regulator activity	-1.5872	33	0.35	WNK1 SGK2 SGK3 SGK1 WNK4 AKAP9 KCNMB4 KCNE4 WNK2 KCNMB3 WNK3 NEDD4L KCNAB2 DLG1 CAV1 YWHAE SUMO1 KCNIP2 ARPP19 ENSA KCNAB1 KCNIP1 FLNA PRKCZ KCNIP3 PIAS3 AMIGO1 KCNIP4 DPP10 RASA1 KCNV1 KCNS3 CHP1
220	Down in 3D Petri	N-methyltransferase activity	-1.5839	67	0.33	TFB1M TRMT11 DIMT1 PRMT5 TRMT1 KMT2A PRMT1 PRMT6 NDUFAF7 KMT2C EED RNMT SETD6 DOT1L FBL PRMT8 METTL16 ASH2L PRMT7 PEMT MEN1 CARM1 CAMKMT PRMT2 TFB2M WDR82 PRMT9 NSD1 KMT2D METTL15 SETD3 PRMT3 SETD4 FBLL1 SETD1A VCPKMT EZH2 ASH1L RBBP5 SETDB2 FBXO11 SETD1B SETDB1 SMYD2 METTL21A SETD7 SUV39H2 CXXC1 N6AMT1 ZCCHC4 SETMAR EHMT1 SETD2 WDR5 EHMT2 KMT2B PRDM6 MECOM EZH1 HEMK1 PRDM2 PRDM16 RRNAD1 SETD5 SM…
239	Down in 3D Petri	Protein methyltransferase activity	-1.5078	67	0.35	PRMT5 KMT2A PRMT1 PRMT6 NDUFAF7 KMT2C METTL22 EED SETD6 DOT1L FBL PRMT8 PCMT1 ASH2L PRMT7 MEN1 CARM1 CAMKMT ARMT1 NTMT1 N6AMT1 PRMT2 WDR82 PRMT9 NSD1 KMT2D PCMTD1 SUZ12 SETD3 PRMT3 SETD4 FBLL1 PCMTD2 LCMT1 SETD1A VCPKMT EZH2 ASH1L RBBP5 SETDB2 FBXO11 SETD1B SETDB1 SMYD2 METTL21A SETD7 SUV39H2 CXXC1 SETMAR TRMT112 EHMT1 SETD2 WDR5 EHMT2 KMT2B PRDM6 MECOM EZH1 HEMK1 ICMT PRDM2 PRDM16 SETD5 LCMT2 SM…
16	Down in 3D Petri	DNA-binding transcription factor activity, RNA polymerase II-specific	-1.185	1029	0.33	ARX SOX8 ETV1 NR1H4 ISL1 NR1H3 FOXC1 KLF6 RARB SOX10 XBP1 SIX4 HIF1A E2F1 ELF4 KLF5 RELB ETV2 SP4 ELF2 KLF3 ELK3 VDR PPARD E2F3 SIM1 BCL6 TFDP2 EPAS1 ARID3A PRDM2 NR5A2 ETV3 IRF6 KLF7 PLAGL1 FOXO3 KLF12 IRF2BPL ELF1 EGR1 LHX4 ZMYM2 ZSCAN20 ZNF205 SOX4 RREB1 IRF1 SOX9 FOXA2 OVOL2 IRF3 GLIS2 ELK1 ATF4 FOXA1 JUND GATA5 NPAS1 RARA PPARG ZMYM5 E2F5 ETS1 GATA4 KLF4 LMX1B TFAP2A ETV6 ZIC5 IRF8 GATA6 NFI…
47	Down in 3D Petri	DNA binding	-1.1717	1726	0.33	MBD3 ACTB HNRNPC SMARCB1 SMARCD2 CHD4 HDAC1 SMARCA4 DPF2 MBD2 ACTL6A GATAD2B MTA2 RBBP4 SMARCC1 HDAC2 RECQL ARX GCFC2 TEAD3 ERCC1 NR1H4 DNASE1L1 PRDM11 SNAI2 ZFP64 HSF2 NR1H3 TBPL1 HMGB3 IKZF2 ARID4A RFC1 PNKP TDP1 PER3 RFC2 NFE2L3 ARID4B PRDM1 PRDM6 TAF2 MCM10 CDK13 ZFAT KLF6 CBFB MEF2A PITX1 SMG6 TCF3 AFF4 NFATC3 TEAD2 TIPIN FOSL2 RARB GTF3C1 XRCC5 RFX3 RBL1 TCF7 MEF2C NFE2L1 GRHL2 REST MYNN OR…
647	Up in 3D Petri	2 iron, 2 sulfur cluster binding	2.0712	19	0.25	ISCA1 ISCU FXN ISCA2 CIAPIN1 FDX1 AOX1 CISD2 XDH CISD3 NDUFS1 GLRX2 FECH SDHB CISD1 UQCRFS1 NDUFV2 GLRX5 SIVA1
158	Up in 3D Petri	Hormone activity	1.8957	35	0.25	PTHLH GCG NPY GNRH2 PYY CRH GHRL TRH GAST AGT INS CGA BMP10 TG MLN STC2 POMC TTR IAPP COPA INHBA INHA VGF INS-IGF2 SST STC1 TOR2A HCRT INHBB NPPC IGF2 CALCB METRNL UTS2B CHGB
691	Up in 3D Petri	Lipoprotein particle binding	1.8621	17	0.33	MSR1 APOA2 SCARB1 CD36 THBS1 CDH13 HSPD1 VLDLR APOA1 LDLR APOE LRP8 ABCA1 PCSK9 MAPT LIPC APOL2
692	Up in 3D Petri	Protein-lipid complex binding	1.8621	17	0.33	MSR1 APOA2 SCARB1 CD36 THBS1 CDH13 HSPD1 VLDLR APOA1 LDLR APOE LRP8 ABCA1 PCSK9 MAPT LIPC APOL2
734	Up in 3D Petri	Fatty acid derivative binding	1.8598	21	0.33	SOAT1 ACADVL ACOT7 ACOT11 ACAD9 PNPLA3 SCP2 DBI HADHA GCDH ACBD5 ACADL HMGCL STX3 ACBD7 ACBD4 ACBD3 ECI2 ACBD6 ALDH6A1 PPARG
276	Up in 3D Petri	Neutral amino acid transmembrane transporter activity	1.8276	19	0.33	SLC36A4 SLC7A8 SLC38A7 SLC36A1 SLC25A38 SLC43A1 SLC43A2 SLC6A19 SLC38A3 SLC6A9 SLC1A5 SLC1A4 SFXN1 SLC38A9 SLC38A1 SLC38A2 SLC3A2 SLC7A5 SLC7A11
398	Up in 3D Petri	Cholesterol transporter activity	1.8222	16	0.35	APOA4 APOA1 APOE APOA2 ABCG1 ABCA1 NPC2 STARD4 STARD5 GRAMD1B GRAMD1A STARD3 STAR GRAMD1C APOB OSBPL2
631	Up in 3D Petri	Microtubule plus-end binding	1.772	16	0.39	PAFAH1B1 MAPRE3 MAPRE1 MAPRE2 CKAP5 CLASP1 CLIP1 APC NUMA1 SKAP1 KIF2C DST CLASP2 STIM1 CLIP2 TTBK2
323	Up in 3D Petri	Oxidoreductase activity, acting on the CH-CH group of donors, NAD or NADP as acceptor	1.7593	20	0.35	DHCR24 DHCR7 BLVRA PECR MECR DPYD DECR1 SRD5A3 PTGR2 LBR AKR1C2 TECR DHDH PTGR1 AKR1D1 SRD5A1 BDH2 FASN ZADH2 TBXAS1
572	Up in 3D Petri	Alcohol binding	1.6639	57	0.33	PROM1 SOAT1 TRPC7 OSBPL8 ITPR3 ERLIN1 APOA4 APOA1 GLE1 ITPR2 APOE OSBPL2 TRPC4 OSBPL1A OSBPL10 TRPC1 STAR ERLIN2 ITPR1 APOA2 OSBP2 ANXA6 APOC3 ABCG1 ABCA1 STARD3NL SYP CD81 RBP1 SCP2 NPC2 STARD3 RBP4 NPC1 XPR1 ASTN2 STARD4 STARD5 ADAP2 PTCH1 DPM1 GRAMD1B NFE2L1 GRAMD1A CDIPT RBP2 PLCL1 LRAT STRA6 SCARB2 PLCL2 PRKCE GRAMD1C RPH3A CYTH2 NR1H3 CAV1
302	Up in 3D Petri	Antioxidant activity	1.6376	43	0.33	GPX7 PRDX5 GPX8 GSTO2 MGST2 GSR SOD2 PRDX1 PRDX6 CAT PRDX4 PXDN SOD1 MGST3 PXDNL GSTO1 PRDX3 GPX4 TXNRD3 TXNRD1 GPX3 MGST1 GSTP1 APOA4 TXNDC17 APOE SESN2 FABP1 APOM GSTA1 SESN1 PARK7 KDM3B DUOX1 DUOX2 TP53INP1 NXN CCS NQO1 UBIAD1 ALB GSTZ1 TXN
34	Up in 3D Petri	Amyloid-beta binding	1.5797	51	0.33	APBA3 APBA2 MSR1 APBA1 APBB3 APOE ITM2C ITM2B TM2D1 APBB2 APBB1 PRNP BACE1 PICALM LRP1 CD36 CACNA1A HSPG2 CACNA1B TGFB2 ATP1A3 APOA1 CLU CLSTN1 COL25A1 SCARB1 DLGAP3 FBXO2 IDE LDLR EPHB2 LDLRAP1 GPRASP2 LDLRAD3 CD74 CST3 FZD5 INSR CHRNA7 GRIA2 GRIA3 MAPK8IP2 GRIA4 NLGN1 NGFR ACHE PGRMC1 EPHA4 IAPP LRPAP1 GRIN2A
178	Up in 3D Petri	Lipid transporter activity	1.4208	93	0.35	ABCD1 ATP9A ATP11B ABCA7 ATP11A ATP8B1 SLC27A5 STARD7 SLCO1A2 ABCB1 PITPNM2 OSBPL8 ATP11C PLEKHA8 OSBP APOA4 PITPNM1 TMEM30A COL4A3BP PLSCR4 OSBPL9 APOA1 ATP8A1 APOE SLC27A1 OSBPL2 ATP8A2 MTTP GLTP SLC27A2 PCTP ABCA8 OSBPL1A ATP8B2 SLC27A3 ABCA12 OSBPL10 OSBPL11 ATP10D PITPNC1 ABCA10 ABCA5 APOA2 ABCG1 ABCA1 ATP9B SLC27A4 ABCA3 PRELID1 PITPNA SLCO2A1 PITPNB TMEM30B GLTPD2 OSBP2 PRELID2 PLSCR1 ABCA…
513	Up in 3D Petri	Amide binding	1.2758	215	0.33	GIPR APBA3 KPNA6 APBA2 MSR1 SOAT1 SEC61A1 IPO5 SEC61A2 TRHDE ACADVL OPRK1 TNPO1 PPIE ACOT7 GSS TNPO2 PLEKHA8 APBA1 PPIF KPNB1 NUP98 GLP1R GHR APBB3 COL4A3BP LNPEP PRLR KPNA1 PEX5L VIPR1 NKTR NUP153 OPRL1 NUP214 APOE ITM2C ITM2B RANBP6 PPIG ENPEP PEX5 GLTP SSTR1 NPEPPS CRHBP NPR2 ACOT11 TM2D1 APBB2 ANXA5 ERAP1 APBB1 PPIB ANPEP PPIC PPID PRNP PPIH SLC19A1 TOMM20 TIMM22 ACAD9 GLTPD2 PTGDR2 PPIL6 BAC…
