# Supplementary material for: Analysis of the transcriptome and metabolome of pancreatic spheroids derived from human induced pluripotent stem cells and matured in an organ-on-a-chip
Source: Royal Society of Chemistry journal article supplement (doi:10.1039/d2mo00132b), 2022-07-12
Supplement: d2mo00132b5.xlsx [file d2mo00132b5.xlsx]

## Sheet: Differentially expressed genes
Regulation	Ensembl ID	log2 Fold Change	Adj.Pval	Symbol	Chr	Type	Stage1-iPSC.1	Stage1-iPSC.2	3D-Biochip.1	3D-Biochip.2	3D-Biochip.3	3D-Biochip.4	3D-Biochip.5	3D-Biochip.6
Up in 3D biochip	ENSG00000145824	4.533	2.21e-10	CXCL14	5q31.1	protein_coding	2	2	3.9348	4.8252	3.84204	4.31724	5.08805	4.02665
Up in 3D biochip	ENSG00000161011	4.2142	9.81e-07	SQSTM1	5q35.3	protein_coding	2.30176	2	4.36199	4.19844	3.84204	5.07012	4.61258	5.07299
Up in 3D biochip	DPP4	4.07988	0.000203	NA	NANA	NA	2.30176	2.63537	4.7326	4.79307	5.3655	5.2819	5.19937	5.82808
Up in 3D biochip	LINC00473	3.87916	5.52e-07	NA	NANA	NA	2	2	4.46394	4.09683	3.84204	3.21905	3.24139	3.82048
Up in 3D biochip	ENSG00000231721	3.81888	9.2e-07	LINC-PINT	7q32.3	processed_transcript	2	2	3.09038	3.44195	3.49038	4.65803	3.7602	4.26243
Up in 3D biochip	ENSG00000104549	3.63283	0.00255	SQLE	8q24.13	protein_coding	2.7638	2	4.07029	4.33859	3.84204	5.13387	5.02899	5.47612
Up in 3D biochip	ENSG00000123240	3.61497	7e-06	OPTN	10p13	protein_coding	2	2	3.86197	3.59886	3.19698	3.87021	3.4358	3.57987
Up in 3D biochip	KCNMB2
Up in 3D biochip	ENSG00000070019	3.35812	0.000685	GUCY2C	12p12.3	protein_coding	2.30176	2	3.61842	3.86922	3.94249	3.71213	3.6071	4.26243
Up in 3D biochip	INSIG1	3.34287	0.00863	NA	NANA	NA	2.94905	2	4.36199	4.24669	3.84204	5.33711	5.44505	4.64267
Up in 3D biochip	ENSG00000118785	3.33305	8.97e-05	SPP1	4q22.1	protein_coding	2	2	3.42973	2.69983	3.02437	3.62609	3.01664	4.9433
Up in 3D biochip	ENSG00000211445	3.29152	0.00669	GPX3	5q33.1	protein_coding	3.39427	2	5.18481	5.13816	4.56361	5.16472	4.69087	5.1337
Up in 3D biochip	ENSG00000081051	3.18031	0.0129	AFP	4q13.3	protein_coding	2.5512	2	3.70426	3.52254	4.79616	4.37114	4.34845	3.82048
Up in 3D biochip	ANK2	3.16746	0.0135	NA	NANA	NA	2.5512	2	3.9348	4.5065	4.68456	4.47324	3.6071	3.06015
Up in 3D biochip	ENSG00000109854	3.13577	0.000439	HTATIP2	11p15.1	protein_coding	2	2	3.86197	3.67135	2.60125	3.43687	3.24139	2.92925
Up in 3D biochip	ENSG00000165646	3.07246	0.000685	SLC18A2	10q25.3	protein_coding	2	2	2.80972	2.95344	2.82827	3.62609	3.7602	3.82048
Up in 3D biochip	ENSG00000096060	3.07168	0.00409	FKBP5	6p21.31	protein_coding	2.30176	2	4.13354	4.09683	4.12457	3.21905	3.6071	2.92925
Up in 3D biochip	ENSG00000151952	3.05166	0.0285	TMEM132D	12q24.33	protein_coding	2.7638	2	4.77289	4.8252	4.4991	3.71213	3.24139	3.74465
Up in 3D biochip	ENSG00000113924	3.05084	0.00476	HGD	3q13.33	protein_coding	2.30176	2	3.52716	3.86922	3.35112	3.43687	3.4358	3.96115
Up in 3D biochip	ENSG00000078114	3.03208	0.0245	NEBL	10p12.31	protein_coding	2.5512	2	4.00413	3.98751	4.20766	4.20301	3.24139	3.66461
Up in 3D biochip	ENSG00000116133	3.02489	0.00519	DHCR24	1p32.3	protein_coding	2.30176	2	3.70426	3.67135	3.61736	3.43687	4.14099	3.29093
Up in 3D biochip	ENSG00000159409	3.02014	0.000992	CELF3	1q21.3	protein_coding	2	2	2.64584	3.44195	3.84204	3.09641	3.4358	3.18015
Up in 3D biochip	ENSG00000135346	3.00354	0.00117	CGA	6q14.3	protein_coding	2	2	3.52716	3.16905	3.49038	2.64995	3.01664	3.48984
Up in 3D biochip	ENSG00000129167	2.94704	0.0369	TPH1	11p15.1	protein_coding	2.30176	2.63537	4.88741	4.62073	4.4991	3.94319	3.8986	3.48984
Up in 3D biochip	RP11-186B7.4
Up in 3D biochip	ENSG00000135090	2.8944	0.00287	TAOK3	12q24.23	protein_coding	2	2	3.21258	3.67135	3.19698	2.46405	2.75029	3.57987
Up in 3D biochip	ENSG00000104687	2.89034	0.011	GSR	8p12	protein_coding	2.30176	2	3.42973	3.67135	3.61736	3.62609	3.4358	3.29093
Up in 3D biochip	PDE10A
Up in 3D biochip	ENSG00000059728	2.87118	0.0115	MXD1	2p13.3	protein_coding	2.30176	2	2.80972	3.26587	3.49038	4.31724	3.4358	3.89253
Up in 3D biochip	ENSG00000047648	2.86913	0.0459	ARHGAP6	Xp22.2	protein_coding	2	3.68408	4.41387	4.38243	4.12457	4.26125	3.6071	3.66461
Up in 3D biochip	ENSG00000050165	2.86535	0.012	DKK3	11p15.3	protein_coding	2.30176	2	3.52716	3.26587	3.02437	4.14231	3.4358	3.57987
Up in 3D biochip	ENSG00000184368	2.86351	0.0409	MAP7D2	Xp22.12	protein_coding	2.5512	2	3.21258	3.86922	4.0364	3.21905	4.14099	4.41699
Up in 3D biochip	ENSG00000177380	2.85493	0.00318	PPFIA3	19q13.33	protein_coding	2	2	3.61842	3.35659	3.35112	3.09641	4.02488	2.23983
Up in 3D biochip	ENSG00000087842	2.81507	0.0121	PIR	Xp22.2	protein_coding	2	2.63537	3.21258	3.98751	3.19698	3.53458	4.24845	5.10366
Up in 3D biochip	ENSG00000112541	2.77844	0.0445	PDE10A	6q27	protein_coding	2.5512	2.63537	5.68456	5.55698	5.3655	3.43687	3.01664	3.39381
Up in 3D biochip	ENSG00000121351	2.77535	0.00571	IAPP	12p12.1	protein_coding	2	2	3.09038	3.44195	3.19698	2.46405	3.24139	3.18015
Up in 3D biochip	ENSG00000204262	2.77218	0.0619	COL5A2	2q32.2	protein_coding	2.94905	2	4.25228	4.33859	4.12457	3.87021	4.24845	3.96115
Up in 3D biochip	ENSG00000170266	2.76245	0.057	GLB1	3p22.3	protein_coding	2.5512	2	3.70426	3.26587	3.02437	4.01266	3.4358	4.7239
Up in 3D biochip	ENSG00000226608	2.75521	0.015	FTLP3	20p13	processed_pseudogene	2	2.63537	3.61842	3.67135	3.61736	4.14231	4.14099	3.82048
Up in 3D biochip	COBLL1	2.75504	0.00673	NA	NANA	NA	2	2	3.52716	3.16905	3.84204	2.8146	2.42338	2.78528
Up in 3D biochip	ENSG00000163536	2.7375	0.00725	SERPINI1	3q26.1	protein_coding	2	2	2.46094	2.8322	2.82827	3.53458	3.01664	3.89253
Up in 3D biochip	ENSG00000065833	2.73403	0.0219	ME1	6q14.2	protein_coding	2.30176	2	3.09038	3.26587	2.60125	3.79333	3.6071	4.207
Up in 3D biochip	ENSG00000005486	2.71694	0.0666	RHBDD2	7q11.23	protein_coding	2.5512	2	3.32524	4.0432	3.35112	3.62609	3.8986	3.74465
Up in 3D biochip	ENSG00000133687	2.68183	0.0276	TMTC1	12p11.22	protein_coding	2.30176	2	3.21258	3.52254	3.02437	3.87021	3.24139	3.29093
Up in 3D biochip	ENSG00000179091	2.67783	0.0283	CYC1	8q24.3	protein_coding	2.30176	2	3.32524	3.16905	2.60125	3.79333	3.24139	4.0893
Up in 3D biochip	ENSG00000147488	2.66946	0.0647	ST18	8q11.23	protein_coding	2.5512	2.63537	4.55916	4.76021	4.68456	4.20301	3.6071	3.82048
Up in 3D biochip	ENSG00000139209	2.65957	0.0114	SLC38A4	12q13.11	protein_coding	2	2	3.09038	2.95344	3.19698	3.09641	2.75029	2.92925
Up in 3D biochip	ENSG00000134333	2.64485	0.0114	LDHA	11p15.1	protein_coding	2	2	4.00413	2.20924	3.61736	2.46405	3.24139	3.66461
Up in 3D biochip	ENSG00000162761	2.64378	0.0121	LMX1A	1q23.3	protein_coding	2	2	2.95687	3.26587	3.49038	2.8146	2.75029	2.78528
Up in 3D biochip	ENSG00000110002	2.64226	0.0313	VWA5A	11q24.2	protein_coding	2.30176	2	3.52716	3.80623	3.19698	2.8146	4.24845	2.92925
Up in 3D biochip	ENSG00000112182	2.64073	0.0123	BACH2	6q15	protein_coding	2	2	2.64584	2.95344	3.19698	3.79333	2.42338	3.06015
Up in 3D biochip	ENSG00000167323	2.63448	0.0321	STIM1	11p15.4	protein_coding	2.30176	2	3.70426	3.44195	3.61736	3.21905	3.01664	3.06015
Up in 3D biochip	ENSG00000189136	2.62108	0.0131	UBE2Q2P1	15q25.2	transcribed_unprocessed_pseudogene	2	2	2.80972	3.26587	3.02437	3.62609	3.01664	2.44542
Up in 3D biochip	ENSG00000112893	2.60636	0.0135	MAN2A1	5q21.3	protein_coding	2	2	3.09038	3.06527	3.49038	3.09641	3.01664	2.44542
Up in 3D biochip	ENSG00000036828	2.59522	0.0167	CASR	3q13.33	protein_coding	2	2	3.42973	3.06527	3.35112	2.96238	2	3.18015
Up in 3D biochip	ENSG00000164054	2.5845	0.0385	SHISA5	3p21.31	protein_coding	2.30176	2	3.9348	2.95344	3.02437	3.79333	3.24139	3.06015
Up in 3D biochip	AC011513.3
Up in 3D biochip	AC009133.22
Up in 3D biochip	ENSG00000185352	2.54857	0.00749	HS6ST3	13q32.1	protein_coding	3.83154	2.63537	5.76666	5.80267	6.23555	4.96889	4.5298	4.87381
Up in 3D biochip	ENSG00000196542	2.52391	0.0397	SPTSSB	3q26.1	protein_coding	2	2.63537	3.32524	2.95344	3.35112	3.79333	4.14099	4.7239
Up in 3D biochip	ENSG00000130643	2.51685	0.0229	CALY	10q26.3	protein_coding	2	2	3.09038	3.26587	2.60125	3.43687	3.6071	2.23983
Up in 3D biochip	ENSG00000124098	2.49747	0.0286	FAM210B	20q13.2	protein_coding	2	2	3.21258	3.16905	2	2.96238	2.75029	3.74465
Up in 3D biochip	ENSG00000147872	2.47751	0.0539	PLIN2	9p22.1	protein_coding	2.30176	2	3.09038	2.55409	3.35112	3.62609	4.02488	3.48984
Up in 3D biochip	ENSG00000112972	2.45858	0.000144	HMGCS1	5p12	protein_coding	3.62941	4.11105	5.52859	5.53772	5.17217	6.23513	6.30441	6.42202
Up in 3D biochip	GCNT3	2.45446	0.0318	NA	NANA	NA	2	2	2.80972	2.69983	2.60125	2.8146	2.75029	3.74465
Up in 3D biochip	ENSG00000166263	2.44888	0.0313	STXBP4	17q22	protein_coding	2	2	3.09038	2.69983	3.02437	3.43687	3.01664	2.44542
Up in 3D biochip	ENSG00000084674	2.44378	0.0313	APOB	2p24.1	protein_coding	2	2	2.64584	2.20924	3.61736	3.09641	3.01664	3.66461
Up in 3D biochip	ENSG00000108861	2.43998	0.167	DUSP3	17q21.31	protein_coding	2.7638	2	3.9348	3.52254	3.19698	3.94319	3.01664	4.31581
Up in 3D biochip	ENSG00000123836	2.43136	0.033	PFKFB2	1q32.1	protein_coding	2	2	2.64584	2.69983	3.35112	3.09641	3.01664	2.78528
Up in 3D biochip	TMEM2	2.43016	0.157	NA	NANA	NA	2.5512	2	3.09038	3.98751	3.49038	3.09641	3.24139	3.82048
Up in 3D biochip	ENSG00000136153	2.41125	0.0367	LMO7	13q22.2	protein_coding	2	2	2.46094	3.16905	3.02437	2.64995	3.6071	2.78528
Up in 3D biochip	ENSG00000117862	2.40873	0.152	TXNDC12	1p32.3	protein_coding	3.26057	2	4.00413	4.19844	4.12457	3.71213	4.5298	4.41699
Up in 3D biochip	ENSG00000134324	2.39308	0.0777	LPIN1	2p25.1	protein_coding	2.30176	2	3.09038	2.95344	3.35112	3.53458	3.6071	2.92925
Up in 3D biochip	ENSG00000049860	2.39009	0.0785	HEXB	5q13.3	protein_coding	2.30176	2	3.61842	2.95344	3.73407	2.96238	3.24139	2.92925
Up in 3D biochip	ENSG00000188211	2.38726	0.0388	NCR3LG1	11p15.1	protein_coding	2	2	3.09038	2.39194	3.02437	3.09641	3.24139	2.78528
Up in 3D biochip	RPE	2.38516	0.171	NA	NANA	NA	2.5512	2	3.70426	3.16905	3.61736	3.43687	3.24139	3.48984
Up in 3D biochip	ENSG00000168675	2.37729	0.0417	LDLRAD4	18p11.21	protein_coding	2	2	3.21258	3.44195	2.82827	2.46405	3.01664	2.44542
Up in 3D biochip	RP11-115J23	2.37337	0.0417	NA	NANA	NA	2	2	3.21258	2.8322	3.35112	2.8146	2.75029	2.44542
Up in 3D biochip	ENSG00000116016	2.36312	0.182	EPAS1	2p21	protein_coding	2.5512	2	3.42973	3.86922	2.60125	3.21905	3.4358	3.89253
Up in 3D biochip	ENSG00000120437	2.36142	0.124	ACAT2	6q25.3	protein_coding	2.7638	2.63537	4.13354	4.24669	4.28622	4.89723	4.24845	3.89253
Up in 3D biochip	ENSG00000239900	2.35792	0.0436	ADSL	22q13.1	protein_coding	2	2	2	3.06527	3.35112	2.8146	3.6071	3.57987
Up in 3D biochip	ENSG00000140465	2.35781	0.18	CYP1A1	15q24.1	protein_coding	2.5512	2	4.13354	3.26587	3.35112	3.21905	4.02488	2.92925
Up in 3D biochip	ENSG00000167037	2.34902	0.049	SGSM1	22q11.23	protein_coding	2	2	2.64584	2.95344	2.33173	2.96238	2.75029	3.39381
Up in 3D biochip	ENSG00000128512	2.34809	0.0958	DOCK4	7q31.1	protein_coding	2.30176	2	3.42973	3.98751	3.73407	2.96238	2.42338	2.62534
Up in 3D biochip	ENSG00000137960	2.33776	0.0474	GIPC2	1p31.1	protein_coding	2	2	3.32524	2.39194	2.60125	3.09641	3.24139	2.78528
Up in 3D biochip	ENSG00000082213	2.32105	0.102	C5orf22	5p13.3	protein_coding	2.30176	2	2.95687	3.06527	3.19698	3.71213	2.75029	3.18015
Up in 3D biochip	ENSG00000138604	2.30437	0.057	GLCE	15q23	protein_coding	2	2	3.32524	3.06527	2.33173	2.8146	3.24139	2.44542
Up in 3D biochip	ENSG00000164327	2.30009	0.113	RICTOR	5p13.1	protein_coding	2.30176	2	3.32524	3.44195	3.35112	3.09641	2.42338	3.06015
Up in 3D biochip	ENSG00000139117	2.29787	0.057	CPNE8	12q12	protein_coding	2	2	2.80972	2.55409	2.82827	3.09641	3.01664	2.78528
Up in 3D biochip	ENSG00000100387	2.29696	0.0567	RBX1	22q13.2	protein_coding	2	2	2.64584	2.95344	3.19698	2.8146	3.24139	2.44542
Up in 3D biochip	ENSG00000109180	2.29592	0.112	OCIAD1	4p11	protein_coding	2.30176	2	2.64584	3.35659	3.49038	4.01266	2.75029	2.78528
Up in 3D biochip	ENSG00000124762	2.27987	0.099	CDKN1A	6p21.2	protein_coding	2	2.63537	3.52716	4.0432	2.60125	3.94319	4.5298	2.78528
Up in 3D biochip	ENSG00000064999	2.26799	0.125	ANKS1A	6p21.31	protein_coding	2.30176	2	3.09038	4.14853	2.82827	2.2506	3.4358	3.39381
Up in 3D biochip	ENSG00000138449	2.26414	0.128	SLC40A1	2q32.2	protein_coding	2.30176	2	3.32524	2.95344	2.82827	3.21905	2.42338	3.82048
Up in 3D biochip	ENSG00000125827	2.24502	0.0445	TMX4	20p12.3	protein_coding	3.62941	2.63537	4.55916	5.26069	4.36072	5.16472	4.83576	5.27518
Up in 3D biochip	ENSG00000109171	2.23999	0.0777	SLAIN2	4p11	protein_coding	2	2	2.95687	2.8322	2.82827	2.46405	2.75029	2.92925
Up in 3D biochip	ENSG00000102780	2.23877	0.132	DGKH	13q14.11	protein_coding	2.30176	2	3.09038	2.8322	3.35112	2.96238	3.24139	3.29093
Up in 3D biochip	ENSG00000116141	2.23394	0.0828	MARK1	1q41	protein_coding	2	2	2.64584	2.8322	2	3.53458	3.01664	3.18015
Up in 3D biochip	ENSG00000080546	2.22513	0.143	SESN1	6q21	protein_coding	2.30176	2	2.80972	3.16905	2.60125	3.33207	2.42338	4.14935
Up in 3D biochip	SPG21	2.2114	0.0843	NA	NANA	NA	2	2	3.09038	2.39194	3.02437	2.2506	3.01664	3.48984
Up in 3D biochip	ENSG00000101391	2.20067	0.0944	CDK5RAP1	20q11.21	protein_coding	2	2	2.46094	2.95344	2.82827	2.64995	2.42338	3.29093
Up in 3D biochip	ENSG00000155189	2.19976	0.132	AGPAT5	8p23.1	protein_coding	2	2.63537	3.52716	3.74036	3.02437	3.33207	2.75029	3.89253
Up in 3D biochip	ENSG00000196188	2.19956	0.099	CTSE	1q32.1	protein_coding	2	2	2.95687	3.06527	2.60125	2.46405	2	3.66461
Up in 3D biochip	ENSG00000262655	2.19502	0.0904	SPON1	11p15.2	protein_coding	2	2	2.2488	2.55409	2.82827	2.96238	3.24139	3.29093
Up in 3D biochip	ENSG00000117682	2.18393	0.0997	DHDDS	1p36.11	protein_coding	2	2	2.46094	3.35659	2.60125	3.09641	2.42338	2.62534
Up in 3D biochip	C18ORF8	2.18339	0.0969	NA	NANA	NA	2	2	2.46094	2.55409	3.35112	2.96238	2.42338	3.06015
Up in 3D biochip	ENSG00000178718	2.1818	0.099	RPP25	15q24.2	protein_coding	2	2	2.2488	3.26587	2.60125	3.33207	2.75029	2.62534
Up in 3D biochip	PRKAR1B	2.17932	0.161	NA	NANA	NA	2.30176	2	3.09038	3.06527	3.19698	3.33207	2.42338	3.18015
Up in 3D biochip	ENSG00000215421	2.16932	0.165	ZNF407	18q22.3	protein_coding	2.30176	2	2.46094	3.80623	3.19698	3.21905	2.42338	3.29093
Up in 3D biochip	ENSG00000129235	2.16689	0.166	TXNDC17	17p13.1	protein_coding	2.30176	2	2.80972	3.26587	3.02437	2.96238	2.42338	3.74465
Up in 3D biochip	ENSG00000158220	2.16088	0.105	ESYT3	3q22.3	protein_coding	2	2	2.64584	2.8322	2.60125	2.46405	3.24139	2.92925
Up in 3D biochip	ENSG00000184985	2.15854	0.11	SORCS2	4p16.1	protein_coding	2	2	2.95687	2.95344	2.82827	2.64995	2.42338	2.62534
Up in 3D biochip	ENSG00000164830	2.14604	0.115	OXR1	8q23.1	protein_coding	2	2	3.09038	2.8322	2.60125	3.09641	2.42338	2.44542
Up in 3D biochip	ENSG00000185950	2.13874	0.174	IRS2	13q34	protein_coding	2.30176	2	3.32524	3.80623	3.49038	2.96238	3.01664	2.23983
Up in 3D biochip	ENSG00000096433	2.13358	0.178	ITPR3	6p21.31	protein_coding	2.30176	2	2.80972	2.69983	3.19698	3.21905	2.75029	3.66461
Up in 3D biochip	ENSG00000198873	2.13294	0.162	GRK5	10q26.11	protein_coding	2	2.63537	4.00413	3.67135	3.49038	2.8146	2.42338	3.82048
Up in 3D biochip	ENSG00000276293	2.1328	0.126	PIP4K2B	17q12	protein_coding	2	2	2.64584	2.95344	3.02437	2.96238	2	2.92925
Up in 3D biochip	ENSG00000111674	2.13136	0.178	ENO2	12p13.31	protein_coding	2.30176	2	3.09038	2.95344	2.82827	3.09641	3.24139	3.06015
Up in 3D biochip	ENSG00000174373	2.12198	0.125	RALGAPA1	14q13.2	protein_coding	2	2	2.80972	3.06527	3.02437	3.09641	2.42338	2.23983
Up in 3D biochip	ENSG00000280830	2.11801	0.123	ADI1	CHR_HSCHR2_1_CTG1	protein_coding	2	2	2.64584	2.20924	3.02437	3.09641	2.75029	3.18015
Up in 3D biochip	ENSG00000117280	2.11702	0.126	RAB29	1q32.1	protein_coding	2	2	2.64584	2.55409	2.60125	2.8146	2.75029	3.06015
Up in 3D biochip	ENSG00000110851	2.10659	0.13	PRDM4	12q23.3	protein_coding	2	2	2.80972	2.95344	3.19698	2.64995	2.42338	2.44542
Up in 3D biochip	ENSG00000141905	2.10286	0.135	NFIC	19p13.3	protein_coding	2	2	2.80972	2.55409	3.02437	3.09641	2	3.06015
Up in 3D biochip	ENSG00000182718	2.09954	0.132	ANXA2	15q22.2	protein_coding	2	2	2.2488	2.95344	2.82827	2.96238	2.75029	2.78528
Up in 3D biochip	FTL	2.09783	9.98e-08	NA	NANA	NA	5.39762	4.70784	6.84137	6.90837	6.43839	7.21116	7.73289	7.28466
Up in 3D biochip	ENSG00000139998	2.09772	0.136	RAB15	14q23.3	protein_coding	2	2	2.64584	2.8322	2	2.64995	3.24139	3.48984
Up in 3D biochip	ENSG00000109321	2.09601	0.134	AREG	4q13.3	protein_coding	2	2	3.42973	2.8322	2.60125	2.46405	2.75029	2.44542
Up in 3D biochip	ENSG00000079689	2.08386	0.0271	SCGN	6p22.2	protein_coding	3.51663	3.41144	4.92365	5.08607	5.08695	4.86002	4.96741	5.69338
Up in 3D biochip	ENSG00000111961	2.08306	0.139	SASH1	6q24.3	protein_coding	2	2	3.09038	2.8322	2.60125	2.64995	2.75029	2.44542
Up in 3D biochip	ENSG00000157064	2.07581	0.138	NMNAT2	1q25.3	protein_coding	2	2	2.64584	2.8322	3.02437	2.96238	3.01664	2.23983
Up in 3D biochip	ENSG00000106344	2.06891	0.19	RBM28	7q32.1	protein_coding	4.08988	2	4.30818	4.38243	4.28622	4.70075	4.5298	5.10366
Up in 3D biochip	PCDHA1
Up in 3D biochip	ENSG00000176871	2.0611	0.144	WSB2	12q24.23	protein_coding	2	2	2.2488	2.55409	2.60125	3.09641	3.6071	2.78528
Up in 3D biochip	ENSG00000175806	2.05994	0.156	MSRA	8p23.1	protein_coding	2	2	3.52716	3.16905	2.33173	2.8146	2.42338	2.23983
Up in 3D biochip	ENSG00000016391	2.04969	0.149	CHDH	3p21.1	protein_coding	2	2	2.64584	2.55409	3.61736	2.2506	3.01664	2.78528
Up in 3D biochip	ENSG00000142546	2.04093	0.158	NOSIP	19q13.33	protein_coding	2	2	2.80972	2.55409	3.02437	2.2506	3.01664	2.92925
Up in 3D biochip	ENSG00000079459	2.03534	0.0217	FDFT1	8p23.1	protein_coding	4.08988	3.07497	5.24333	4.69216	4.43157	5.60793	6.09001	6.21281
Up in 3D biochip	HIF3A	2.03333	0.16	NA	NANA	NA	2	2	2.64584	2.55409	2.82827	2.96238	3.01664	2.44542
Up in 3D biochip	ENSG00000100065	2.02986	0.161	CARD10	22q13.1	protein_coding	2	2	2.80972	2.39194	2.33173	2.96238	3.6071	2.62534
Up in 3D biochip	FAM126B	2.02804	0.171	NA	NANA	NA	2	2	3.09038	2.95344	2	2.8146	2.75029	2.78528
Up in 3D biochip	ENSG00000112139	2.02357	0.167	MDGA1	6p21.2	protein_coding	2	2	3.09038	2.95344	3.35112	2.2506	2.42338	2.44542
Up in 3D biochip	ENSG00000143786	2.02078	0.167	CNIH3	1q42.12	protein_coding	2	2	2.64584	2.95344	2.33173	2.46405	3.4358	2.62534
Up in 3D biochip	ENSG00000152223	2.00401	0.172	EPG5	18q21.1	protein_coding	2	2	2.2488	2.55409	3.49038	2.96238	2.75029	2.62534
Up in 3D biochip	CHN2	1.99823	0.149	NA	NANA	NA	2.7638	3.41144	4.81208	5.18842	4.74144	4.01266	3.6071	3.66461
Up in 3D biochip	ENSG00000174939	1.99797	0.18	ASPHD1	16p11.2	protein_coding	2	2	2.95687	2.8322	2.33173	2.64995	3.01664	2.44542
Up in 3D biochip	ENSG00000175832	1.99347	0.182	ETV4	17q21.31	protein_coding	2	2	2.64584	3.06527	2.60125	2.46405	3.01664	2.44542
Up in 3D biochip	HSPB8
Up in 3D biochip	ENSG00000170419	1.98366	0.19	VSTM2A	7p11.2	protein_coding	2	2	2.46094	2.39194	2.33173	2.96238	2.75029	3.39381
Up in 3D biochip	SLC20A1	1.98141	0.197	NA	NANA	NA	2	2	2.46094	2.69983	2.33173	2.46405	2.42338	3.82048
Up in 3D biochip	ENSG00000107249	1.97394	0.0944	GLIS3	9p24.2	protein_coding	2.7638	3.9133	4.7326	5.08607	4.84888	4.14231	3.8986	4.31581
Up in 3D biochip	ENSG00000176473	1.97231	0.197	WDR25	14q32.2	protein_coding	2	2	2.95687	3.16905	3.02437	2.46405	2.42338	2.23983
Up in 3D biochip	ENSG00000145087	1.96779	0.0436	STXBP5L	3q13.33	protein_coding	3.51663	3.41144	5.0272	5.11235	5.53596	5.16472	4.44197	4.76286
Up in 3D biochip	ENSG00000168528	1.96717	0.173	SERINC2	1p35.2	protein_coding	2.94905	3.07497	3.9348	4.0432	4.0364	4.47324	4.5298	5.22024
Up in 3D biochip	ENSG00000260230	1.96619	0.195	FRRS1L	9q31.3	protein_coding	2	2	2.2488	2.8322	3.35112	2.8146	2.75029	2.44542
Up in 3D biochip	ENSG00000152270	1.96069	0.0555	PDE3B	11p15.2	protein_coding	3.39427	3.41144	5.18481	5.70245	5.3655	4.56859	4.90309	3.89253
Up in 3D biochip	ENSG00000128708	1.95438	0.199	HAT1	2q31.1	protein_coding	2	2	2.64584	2.8322	2.82827	2.2506	3.6071	2.44542
Up in 3D biochip	ENSG00000136842	1.89291	0.16	TMOD1	9q22.33	protein_coding	2.7638	3.68408	4.00413	4.38243	3.94249	4.70075	3.7602	5.19197
Up in 3D biochip	ENSG00000182901	1.84832	0.171	RGS7	1q43	protein_coding	3.73401	2.63537	5.06013	4.8252	4.74144	4.89723	4.02488	4.36729
Up in 3D biochip	ENSG00000165092	1.76548	0.0682	ALDH1A1	9q21.13	protein_coding	3.83154	3.41144	4.88741	4.69216	4.56361	5.13387	5.44505	5.80959
Up in 3D biochip	ENSG00000167642	1.73721	0.158	SPINT2	19q13.2	protein_coding	3.1132	3.68408	4.36199	4.29337	4.12457	4.70075	4.69087	5.3281
Up in 3D biochip	RP1-59M18.2
Up in 3D biochip	ENSG00000023287	1.68434	0.00971	RB1CC1	8q11.23	protein_coding	4.9963	3.68408	5.64169	5.98437	5.40124	6.03263	6.03104	6.42202
Up in 3D biochip	ENSG00000036565	1.65684	0.0164	SLC18A1	8p21.3	protein_coding	4.3751	4.11105	5.78647	5.63155	5.87788	5.2819	5.35174	6.03323
Up in 3D biochip	ENSG00000104763	1.62549	0.0388	ASAH1	8p22	protein_coding	4.0088	4.11105	4.88741	5.28399	4.79616	5.83585	5.61532	5.84633
Up in 3D biochip	ENSG00000132963	1.58676	0.182	POMP	13q12.3	protein_coding	3.39427	3.68408	4.46394	4.14853	4.36072	4.86002	5.44505	5.22024
Up in 3D biochip	ENSG00000120885	1.56502	0.124	CLU	8p21.1	protein_coding	3.83154	3.68408	4.85024	4.97591	5.21297	5.03716	5.25197	4.9433
Up in 3D biochip	ENSG00000166922	1.56315	0.00118	SCG5	15q13.3	protein_coding	5.07807	4.82512	6.19503	6.01254	5.77266	6.80415	6.61668	6.76682
Up in 3D biochip	ENSG00000089199	1.54252	2.15e-05	CHGB	20p12.3	protein_coding	5.73666	5.30063	6.8223	7.15582	7.20687	6.70271	6.87324	7.02901
Up in 3D biochip	ENSG00000109472	1.52533	0.00102	CPE	4q32.3	protein_coding	4.9963	5.12875	6.86019	6.59095	6.58545	6.12963	5.90532	6.09561
Up in 3D biochip	ENSG00000074696	1.49436	0.148	HACD3	15q22.31	protein_coding	3.92289	3.68408	4.69116	5.11235	4.12457	5.2245	5.14478	5.67307
Up in 3D biochip	ENSG00000165678	1.4801	0.171	GHITM	10q23.1	protein_coding	3.83154	3.68408	4.7326	4.79307	4.79616	5.2245	4.69087	5.3281
Up in 3D biochip	ENSG00000102241	1.47963	0.0436	HTATSF1	Xq26.3	protein_coding	4.30891	4.28492	5.27173	5.77003	5.53596	5.39028	5.44505	5.71341
Up in 3D biochip	ENSG00000100664	1.42692	0.155	EIF5	14q32.32	protein_coding	3.39427	4.58016	4.30818	4.29337	4.94887	5.16472	5.14478	5.80959
Up in 3D biochip	ENSG00000145730	1.39796	0.105	PAM	5q21.1	protein_coding	3.92289	4.44008	5.29957	5.5182	5.08695	4.86002	4.96741	5.52227
Up in 3D biochip	ENSG00000115263	1.3718	7.24e-10	GCG	2q24.2	protein_coding	6.58691	6.66374	7.60345	7.60764	7.99008	7.96495	8.3546	8.03487
Up in 3D biochip	ENSG00000166710	1.26447	0.192	B2M	15q21.1	protein_coding	3.92289	4.44008	5.24333	4.62073	4.4991	5.6302	5.30271	5.47612
Up in 3D biochip	ENSG00000113448	1.25287	0.0595	PDE4D	5q12.1	protein_coding	4.71888	4.70784	6.57133	6.54346	6.56983	5.13387	4.76513	4.90898
Up in 3D biochip	ENSG00000118271	1.22667	0.0013	TTR	18q12.1	protein_coding	5.83402	5.52525	6.67063	6.0538	6.52193	7.35183	7.35419	7.24393
Up in 3D biochip	ENSG00000167088	1.22065	0.028	SNRPD1	18q11.2	protein_coding	5.29877	4.82512	6.11893	6.24406	5.62933	6.41267	6.3291	6.26803
Up in 3D biochip	ENSG00000138760	1.21212	0.0253	SCARB2	4q21.1	protein_coding	5.19263	5.03447	6.14986	5.95563	5.87788	6.20576	6.61668	6.42202
Up in 3D biochip	SDK1	1.201	0.0509	NA	NANA	NA	4.76898	5.03447	6.42732	6.7247	6.31265	5.41615	5.39915	4.9433
Up in 3D biochip	ENSG00000122406	1.09473	0.101	RPL5	1p22.1	protein_coding	5.03777	4.82512	5.72619	5.63155	5.47017	6.12963	6.30441	6.16997
Up in 3D biochip	ENSG00000144224	1.05018	0.0123	UBXN4	2q21.3	protein_coding	5.81029	5.65766	6.40185	6.36919	6.36788	6.85232	6.6366	7.33724
Up in 3D biochip	ENSG00000251562	0.893554	4.03e-70	MALAT1	11q13.1	lincRNA	9.1777	9.70009	10.1559	10.1417	10.2722	10.0839	10.108	10.0422
Up in 3D biochip	RP11-120M18.2
Down in 3D biochip	KIRREL	-4.60389	7.59e-13	NA	NANA	NA	4.08988	3.9133	2	2.20924	2	2	2	2
Down in 3D biochip	ENSG00000080493	-4.13135	7.78e-09	SLC4A4	4q13.3	protein_coding	4.30891	4.82512	3.21258	2.20924	2.60125	2	2	2
Down in 3D biochip	ACSM3	-3.97734	1.05e-07	NA	NANA	NA	3.83154	4.28492	2.2488	2.39194	2	2	2	2.23983
Down in 3D biochip	ENSG00000167653	-3.96485	9.69e-08	PSCA	8q24.3	protein_coding	3.39427	4.11105	2	2	2	2	2	2.44542
Down in 3D biochip	ENSG00000188488	-3.94786	2.92e-08	SERPINA5	14q32.13	protein_coding	3.92289	4.28492	2.64584	2	2	2	2.42338	2
Down in 3D biochip	ENSG00000150893	-3.84667	7.14e-07	FREM2	13q13.3	protein_coding	4.08988	3.68408	2	2.55409	2.60125	2	2	2
Down in 3D biochip	ENSG00000111249	-3.71272	1.7e-05	CUX2	12q24.11	protein_coding	3.1132	3.41144	2	2	2	2	2	2
Down in 3D biochip	ENSG00000112936	-3.67248	1.24e-05	C7	5p13.1	protein_coding	3.83154	3.41144	2.2488	2.20924	2	2.2506	2	2
Down in 3D biochip	ENSG00000139926	-3.62773	3.88e-05	FRMD6	14q22.1	protein_coding	3.51663	3.07497	2.2488	2	2	2	2	2
Down in 3D biochip	ENSG00000108684	-3.60706	2.77e-06	ASIC2	17q12	protein_coding	4.0088	4.82512	2.46094	2.69983	2	2.46405	2.42338	2
Down in 3D biochip	ENSG00000132688	-3.58721	3.01e-05	NES	1q23.1	protein_coding	3.1132	3.68408	2	2	2	2	2	2.23983
Down in 3D biochip	ENSG00000172137	-3.53226	0.000205	CALB2	16q22.2	protein_coding	3.1132	3.07497	2	2	2	2	2	2
Down in 3D biochip	ENSG00000038427	-3.44597	7.47e-05	VCAN	5q14.2	protein_coding	3.92289	3.9133	3.52716	2.8322	2	2	2	2
Down in 3D biochip	ENSG00000163359	-3.39625	0.00026	COL6A3	2q37.3	protein_coding	3.1132	3.41144	2	2	2	2.2506	2	2
Down in 3D biochip	ENSG00000129757	-3.31133	0.000408	CDKN1C	11p15.4	protein_coding	4.0088	3.41144	2.64584	2.20924	2.33173	2.2506	2	2
Down in 3D biochip	ENSG00000183666	-3.22892	3.84e-05	GUSBP1	5p14.3	transcribed_unprocessed_pseudogene	4.3751	4.28492	2.80972	2.95344	3.02437	2	2.75029	2
Down in 3D biochip	ENSG00000148677	-3.19501	0.000861	ANKRD1	10q23.31	protein_coding	3.51663	3.9133	2.95687	2	2	2.2506	2	2.44542
Down in 3D biochip	ENSG00000182132	-3.18218	0.000205	KCNIP1	5q35.1	protein_coding	4.23953	3.9133	2.2488	2.20924	2.60125	2.2506	2.75029	2.23983
Down in 3D biochip	ENSG00000125398	-3.17914	0.00172	SOX9	17q24.3	protein_coding	3.39427	3.41144	2.2488	2.20924	2	2	2	2.44542
Down in 3D biochip	ENSG00000164796	-3.14081	0.00379	CSMD3	8q23.3	protein_coding	2.5512	3.68408	2	2	2	2	2	2
Down in 3D biochip	ENSG00000183833	-3.12809	0.00693	MAATS1	3q13.33	protein_coding	2.7638	3.07497	2	2	2	2	2	2
Down in 3D biochip	ENSG00000149571	-3.08305	0.000932	KIRREL3	11q24.2	protein_coding	4.08988	3.68408	2.46094	2.39194	3.02437	2.46405	2	2
Down in 3D biochip	ENSG00000101335	-3.06443	0.0135	MYL9	20q11.23	protein_coding	2.94905	2.63537	2	2	2	2	2	2
Down in 3D biochip	RP11-277P12	-3.06443	0.0135	NA	NANA	NA	2.94905	2.63537	2	2	2	2	2	2
Down in 3D biochip	ENSG00000130600	-3.02582	0.000293	H19	11p15.5	processed_transcript	4.8174	3.41144	3.09038	2.55409	2.82827	2.2506	2.75029	2
Down in 3D biochip	ENSG00000106348	-3.0183	5.8e-05	IMPDH1	7q32.1	protein_coding	4.66698	4.11105	3.42973	2.20924	2.33173	2.8146	2.75029	2.23983
Down in 3D biochip	ENSG00000171295	-2.9896	0.0085	ZNF440	19p13.2	protein_coding	2.7638	3.41144	2	2	2	2.2506	2	2
Down in 3D biochip	SOX11
Down in 3D biochip	ENSG00000140937	-2.96485	0.0113	CDH11	16q21	protein_coding	2.94905	3.07497	2	2	2	2	2.42338	2
Down in 3D biochip	ENSG00000066468	-2.96105	0.00476	FGFR2	10q26.13	protein_coding	3.39427	3.68408	2.2488	2	2.33173	2.2506	2.42338	2
Down in 3D biochip	ENSG00000123810	-2.89761	0.0217	B9D2	19q13.2	protein_coding	2.7638	3.07497	2	2.20924	2	2	2	2
Down in 3D biochip	ENSG00000196358	-2.88641	0.0114	NTNG2	9q34.13	protein_coding	3.83154	3.07497	2.2488	2.20924	2	2.2506	2.42338	2.23983
Down in 3D biochip	ENSG00000104327	-2.86829	0.0245	CALB1	8q21.3	protein_coding	2.7638	3.07497	2	2	2	2	2	2.23983
Down in 3D biochip	ENSG00000077942	-2.86067	0.0275	FBLN1	22q13.31	protein_coding	3.1132	2.63537	2	2	2.33173	2	2	2
Down in 3D biochip	ENSG00000114019	-2.86067	0.0275	AMOTL2	3q22.2	protein_coding	3.1132	2.63537	2	2	2.33173	2	2	2
Down in 3D biochip	ENSG00000157570	-2.85914	0.0123	TSPAN18	11p11.2	protein_coding	3.39427	3.07497	2	2.20924	2	2.2506	2.42338	2
Down in 3D biochip	ENSG00000074219	-2.84069	0.0409	TEAD2	19q13.33	protein_coding	2.7638	2.63537	2	2	2	2	2	2
Down in 3D biochip	ENSG00000124215	-2.84069	0.0409	CDH26	20q13.33	protein_coding	2.7638	2.63537	2	2	2	2	2	2
Down in 3D biochip	ENSG00000173611	-2.84069	0.0409	SCAI	9q33.3	protein_coding	2.7638	2.63537	2	2	2	2	2	2
Down in 3D biochip	ENSG00000178184	-2.84069	0.0409	PARD6G	18q23	protein_coding	2.7638	2.63537	2	2	2	2	2	2
Down in 3D biochip	ENSG00000188580	-2.84069	0.0409	NKAIN2	6q22.31	protein_coding	2.7638	2.63537	2	2	2	2	2	2
Down in 3D biochip	ENSG00000135637	-2.8405	0.035	CCDC142	2p13.1	protein_coding	2.5512	3.07497	2	2	2	2	2	2
Down in 3D biochip	ENSG00000095981	-2.82496	2.77e-06	KCNK16	6p21.2	protein_coding	4.86425	4.93359	2.80972	2.55409	3.02437	2.8146	3.01664	2.92925
Down in 3D biochip	ENSG00000147257	-2.81684	0.00463	GPC3	Xq26.2	protein_coding	3.51663	4.28492	2	2	2.60125	2.46405	3.01664	2.78528
Down in 3D biochip	ENSG00000114554	-2.78464	0.000293	PLXNA1	3q21.3	protein_coding	4.49902	4.28492	3.21258	2.55409	3.02437	2.64995	2	2.44542
Down in 3D biochip	ENSG00000198121	-2.78066	0.0144	LPAR1	9q31.3	protein_coding	2.7638	4.11105	2	2.95344	2.33173	2	2	2
Down in 3D biochip	ENSG00000104427	-2.77681	0.033	ZC2HC1A	8q21.13	protein_coding	3.39427	2.63537	2	2.55409	2.33173	2	2	2
Down in 3D biochip	ENSG00000234616	-2.75101	0.00519	JRK	8q24.3	protein_coding	4.08988	3.68408	2.64584	2.55409	2.60125	2.46405	2	2.23983
Down in 3D biochip	ENSG00000172318	-2.74796	0.0472	B3GALT1	2q24.3	protein_coding	2.94905	2.63537	2	2	2	2.2506	2	2
Down in 3D biochip	ENSG00000108691	-2.74183	0.0367	CCL2	17q12	protein_coding	2.7638	3.07497	2	2	2	2	2.42338	2
Down in 3D biochip	ENSG00000233527	-2.73479	0.0526	ZNF529-AS1	19q13.12	antisense	2.94905	2.63537	2	2.39194	2	2	2	2
Down in 3D biochip	ENSG00000131153	-2.72062	0.0445	GINS2	16q24.1	protein_coding	2.30176	3.68408	2	2	2	2	2	2
Down in 3D biochip	ENSG00000088756	-2.71411	0.0395	ARHGAP28	18p11.31	protein_coding	2.5512	3.41144	2.2488	2	2	2	2	2
Down in 3D biochip	ENSG00000103540	-2.71367	0.0474	CCP110	16p12.3	protein_coding	3.26057	2.63537	2	2.39194	2	2.46405	2	2
Down in 3D biochip	ENSG00000075275	-2.70984	0.0388	CELSR1	22q13.31	protein_coding	3.1132	3.07497	2.2488	2.39194	2	2.2506	2	2
Down in 3D biochip	ENSG00000070718	-2.69404	0.0369	AP3M2	8p11.21	protein_coding	2.7638	3.41144	2.46094	2	2	2.2506	2	2
Down in 3D biochip	ENSG00000053372	-2.68752	0.0436	MRTO4	1p36.13	protein_coding	3.26057	2.63537	2	2	2	2.2506	2.42338	2
Down in 3D biochip	ENSG00000198719	-2.67795	0.0388	DLL1	6q27	protein_coding	3.39427	2.63537	2	2	3.02437	2	2	2
Down in 3D biochip	ENSG00000080839	-2.67095	0.0518	RBL1	20q11.23	protein_coding	2.7638	3.07497	2	2.20924	2	2	2	2.23983
Down in 3D biochip	ENSG00000088882	-2.65874	0.0313	CPXM1	20p13	protein_coding	3.39427	3.41144	3.09038	2	2	2	2.42338	2.62534
Down in 3D biochip	ENSG00000112996	-2.6583	0.0313	MRPS30	5p12	protein_coding	3.39427	3.41144	2.64584	2.39194	2	2.2506	2	2.23983
Down in 3D biochip	ENSG00000164300	-2.64982	0.000157	SERINC5	5q14.1	protein_coding	4.3751	4.93359	3.21258	2.39194	3.02437	3.21905	2	2.92925
Down in 3D biochip	ENSG00000144560	-2.64963	0.0321	VGLL4	3p25.2	protein_coding	3.73401	3.07497	2.2488	2.39194	2.82827	2.46405	2	2
Down in 3D biochip	CTD-2561J22	-2.63815	0.113	NA	NANA	NA	3.26057	2	2	2	2	2	2	2
Down in 3D biochip	ENSG00000197728	-2.62792	0.0509	RPS26	12q13.2	protein_coding	2.5512	3.41144	2	2	2	2	2.42338	2
Down in 3D biochip	ENSG00000170917	-2.61021	0.0958	NUDT6	4q28.1	protein_coding	2.7638	2.63537	2	2.20924	2	2	2	2
Down in 3D biochip	ENSG00000250786	-2.61021	0.0958	SNHG18	5p15.31	lincRNA	2.7638	2.63537	2	2.20924	2	2	2	2
Down in 3D biochip	ENSG00000092969	-2.61002	0.0807	TGFB2	1q41	protein_coding	2.5512	3.07497	2	2.20924	2	2	2	2
Down in 3D biochip	ENSG00000169635	-2.61002	0.0807	HIC2	22q11.21	protein_coding	2.5512	3.07497	2	2.20924	2	2	2	2
Down in 3D biochip	ENSG00000169621	-2.60858	0.0445	APLF	2p13.3	protein_coding	3.1132	3.41144	3.09038	2	2.33173	2.2506	2	2
Down in 3D biochip	ENSG00000104626	-2.6056	0.0859	ERI1	8p23.1	protein_coding	2.30176	3.41144	2	2	2	2	2	2
Down in 3D biochip	ENSG00000135547	-2.6056	0.0859	HEY2	6q22.31	protein_coding	2.30176	3.41144	2	2	2	2	2	2
Down in 3D biochip	ENSG00000162998	-2.6056	0.0859	FRZB	2q32.1	protein_coding	2.30176	3.41144	2	2	2	2	2	2
Down in 3D biochip	ENSG00000033122	-2.60254	0.0602	LRRC7	1p31.1	protein_coding	2.5512	3.41144	2.46094	2	2	2	2	2
Down in 3D biochip	ENSG00000110723	-2.59791	0.0435	EXPH5	11q22.3	protein_coding	2.94905	3.68408	2	2.39194	2.33173	2	2	2.62534
Down in 3D biochip	RP11-77K12.1
Down in 3D biochip	ENSG00000101680	-2.57714	0.02	LAMA1	18p11.31	protein_coding	3.39427	4.11105	2.64584	2.39194	2.82827	2.64995	2	2
Down in 3D biochip	ENSG00000117419	-2.57714	0.0367	ERI3	1p34.1	protein_coding	3.51663	3.41144	2	3.26587	3.19698	2.2506	2	2
Down in 3D biochip	IGFBP2	-2.57362	0.0247	NA	NANA	NA	3.83154	3.41144	2.80972	2.20924	2.33173	2.2506	2.42338	2.23983
Down in 3D biochip	AC144450	-2.55667	0.129	NA	NANA	NA	2.5512	2.63537	2	2	2	2	2	2
Down in 3D biochip	ENSG00000114541	-2.549	0.00708	FRMD4B	3p14.1	protein_coding	3.73401	4.44008	3.09038	2.69983	2.82827	3.09641	2	2
Down in 3D biochip	AC068490	-2.54043	0.099	NA	NANA	NA	2.5512	3.07497	2.2488	2	2	2	2	2
Down in 3D biochip	ENSG00000135119	-2.54043	0.099	RNFT2	12q24.22	protein_coding	2.5512	3.07497	2.2488	2	2	2	2	2
Down in 3D biochip	ENSG00000181234	-2.54043	0.099	TMEM132C	12q24.32	protein_coding	2.5512	3.07497	2.2488	2	2	2	2	2
Down in 3D biochip	ZNF780B
Down in 3D biochip	ENSG00000197451	-2.53922	0.0728	HNRNPAB	5q35.3	protein_coding	2.7638	3.41144	2.64584	2	2	2	2	2.44542
Down in 3D biochip	ENSG00000165512	-2.5307	0.0135	ZNF22	10q11.21	protein_coding	3.51663	4.28492	2.46094	2.39194	2.82827	2.46405	3.01664	2
Down in 3D biochip	ENSG00000108551	-2.52863	0.0579	RASD1	17p11.2	protein_coding	3.51663	3.07497	2.2488	2.20924	2	2.8146	2	2.44542
Down in 3D biochip	ENSG00000077044	-2.52666	0.0542	DGKD	2q37.1	protein_coding	3.26057	3.41144	2.2488	2.8322	2.33173	2.2506	2	2
Down in 3D biochip	ENSG00000081479	-2.52422	0.123	LRP2	2q31.1	protein_coding	2.7638	2.63537	2	2	2	2.2506	2	2
Down in 3D biochip	ENSG00000092377	-2.51821	0.0807	TBL1Y	Yp11.2	protein_coding	2.7638	3.07497	2	2	2	2	2.75029	2
Down in 3D biochip	ENSG00000143061	-2.51194	0.0834	IGSF3	1p13.1	protein_coding	3.1132	3.07497	2.2488	2	2.33173	2.2506	2	2.23983
Down in 3D biochip	PDE8B
Down in 3D biochip	TTC7A	-2.49988	0.0904	NA	NANA	NA	3.1132	3.07497	2.2488	2.55409	2	2	2	2.44542
Down in 3D biochip	ENSG00000172575	-2.49642	0.0313	RASGRP1	15q14	protein_coding	3.83154	3.41144	2	2.8322	3.02437	2.64995	2.75029	2
Down in 3D biochip	ENSG00000135919	-2.49327	0.0807	SERPINE2	2q36.1	protein_coding	2.94905	3.41144	2.46094	2	2	2.2506	2	2.62534
Down in 3D biochip	ENSG00000159055	-2.48799	0.0958	MIS18A	21q22.11	protein_coding	2.5512	3.41144	2.2488	2	2	2.2506	2	2
Down in 3D biochip	ENSG00000150687	-2.48177	0.0474	PRSS23	11q14.2	protein_coding	3.83154	3.07497	2.95687	2	2	2.2506	2.75029	2.78528
Down in 3D biochip	ENSG00000107362	-2.48011	0.132	ABHD17B	9q21.13	protein_coding	2.94905	2.63537	2.46094	2.20924	2	2	2	2
Down in 3D biochip	ENSG00000152990	-2.47554	0.0658	ADGRA3	4p15.2	protein_coding	3.26057	3.41144	2.95687	2.8322	2.33173	2	2	2
Down in 3D biochip	ENSG00000130758	-2.475	0.112	MAP3K10	19q13.2	protein_coding	2.7638	3.07497	2.64584	2.20924	2	2	2	2
Down in 3D biochip	ENSG00000141431	-2.46392	0.13	ASXL3	18q12.1	protein_coding	3.1132	2.63537	2.64584	2	2	2.46405	2	2
Down in 3D biochip	ENSG00000163545	-2.45424	0.128	NUAK2	1q32.1	protein_coding	2.5512	3.07497	2	2	2	2	2.42338	2
Down in 3D biochip	ENSG00000113231	-2.44915	0.162	PDE8B	5q13.3	protein_coding	2.30176	3.07497	2	2	2	2	2	2
Down in 3D biochip	ENSG00000152256	-2.44915	0.162	PDK1	2q31.1	protein_coding	2.30176	3.07497	2	2	2	2	2	2
Down in 3D biochip	ENSG00000166828	-2.44915	0.162	SCNN1G	16p12.2	protein_coding	2.30176	3.07497	2	2	2	2	2	2
Down in 3D biochip	ENSG00000261949	-2.44915	0.162	GFY	19q13.33	protein_coding	2.30176	3.07497	2	2	2	2	2	2
Down in 3D biochip	PRSS53
Down in 3D biochip	ENSG00000101246	-2.43602	0.123	ARFRP1	20q13.33	protein_coding	2.94905	3.07497	2.2488	2.20924	2	2.64995	2	2
Down in 3D biochip	RP13-188A5	-2.43298	0.0801	NA	NANA	NA	2.7638	3.41144	2	2	2.33173	2	2.42338	2
Down in 3D biochip	ENSG00000205189	-2.42596	0.0944	ZBTB10	8q21.13	protein_coding	3.39427	3.07497	2	2	2	3.09641	2.42338	2.78528
Down in 3D biochip	GPR141
Down in 3D biochip	ENSG00000185985	-2.41872	0.0868	SLITRK2	Xq27.3	protein_coding	2.94905	3.41144	2.2488	2.20924	2	2	2.75029	2
Down in 3D biochip	ENSG00000086504	-2.41852	0.112	MRPL28	16p13.3	protein_coding	3.1132	3.07497	2	2	2	2.2506	2.42338	2.78528
Down in 3D biochip	ENSG00000254726	-2.4119	0.077	MEX3A	1q22	protein_coding	3.1132	3.68408	2.2488	2.55409	2	2.2506	2	2.62534
Down in 3D biochip	ENSG00000088387	-2.40923	0.0369	DOCK9	13q32.3	protein_coding	3.51663	3.9133	2.64584	3.06527	2	2.2506	2.42338	2.23983
Down in 3D biochip	ENSG00000165323	-2.40874	0.165	FAT3	11q14.3	protein_coding	2.7638	2.63537	2	2	2	2.46405	2	2
Down in 3D biochip	ENSG00000182272	-2.40855	0.148	B4GALNT4	11p15.5	protein_coding	2.5512	3.07497	2	2	2	2.46405	2	2
Down in 3D biochip	ENSG00000105497	-2.40166	0.194	ZNF175	19q13.41	protein_coding	3.39427	2	2	2	2	2	2.42338	2
Down in 3D biochip	ENSG00000103248	-2.39419	0.117	MTHFSD	16q24.1	protein_coding	2.94905	3.07497	2.2488	2	2	2	2.42338	2.23983
Down in 3D biochip	ENSG00000176024	-2.38355	0.182	ZNF613	19q13.41	protein_coding	2.7638	2.63537	2	2.20924	2	2	2	2.23983
Down in 3D biochip	ENSG00000162738	-2.36009	0.192	VANGL2	1q23.2	protein_coding	2.7638	2.63537	2.2488	2.20924	2	2	2	2
Down in 3D biochip	ENSG00000112294	-2.3599	0.172	ALDH5A1	6p22.3	protein_coding	2.5512	3.07497	2.2488	2.20924	2	2	2	2
Down in 3D biochip	TTN	-2.35732	0.0123	NA	NANA	NA	4.23953	3.9133	2.46094	2.95344	2.82827	2.64995	2	2.92925
Down in 3D biochip	ENSG00000064545	-2.35005	0.131	TMEM161A	19p13.11	protein_coding	3.26057	3.07497	2.64584	2	2.33173	2.46405	2	2.23983
Down in 3D biochip	ENSG00000119866	-2.34576	0.139	BCL11A	2p16.1	protein_coding	2.5512	3.41144	2	2.20924	2	2	2.42338	2
Down in 3D biochip	ENSG00000196950	-2.33444	0.00814	SLC39A10	2q32.3	protein_coding	4.43839	3.9133	2.95687	2.20924	3.19698	3.09641	2	3.39381
Down in 3D biochip	ENSG00000165238	-2.33425	0.0449	WNK2	9q22.31	protein_coding	3.62941	3.68408	2.46094	2	3.02437	2.64995	2.42338	2.62534
Down in 3D biochip	ENSG00000225968	-2.3252	0.165	ELFN1	7p22.3	protein_coding	2.94905	3.07497	2	2.20924	2	2.96238	2	2.23983
Down in 3D biochip	ENSG00000234899	-2.32461	0.174	SOX9-AS1	17q24.3	processed_transcript	2.30176	3.68408	2	2.55409	2	2	2	2
Down in 3D biochip	ENSG00000175115	-2.32255	0.139	PACS1	11q13.1	protein_coding	3.26057	3.07497	2.46094	2.69983	2.82827	2	2	2
Down in 3D biochip	RP11-444D3	-2.32095	0.187	NA	NANA	NA	3.26057	2.63537	2	2.8322	2	2.96238	2	2
Down in 3D biochip	ENSG00000092853	-2.31437	0.124	CLSPN	1p34.3	protein_coding	2.94905	3.68408	2.46094	2.20924	2.82827	2.2506	2	2
Down in 3D biochip	ENSG00000185046	-2.30844	0.000331	ANKS1B	12q23.1	protein_coding	4.55721	5.03447	2.64584	3.16905	3.73407	2.8146	2.75029	3.06015
Down in 3D biochip	ENSG00000173890	-2.30807	0.0509	GPR160	3q26.2	protein_coding	3.62941	3.68408	2.2488	2	2.82827	3.53458	2	3.06015
Down in 3D biochip	ENSG00000150471	-2.30749	0.16	ADGRL3	4q13.1	protein_coding	3.62941	2.63537	2.46094	2.69983	2.33173	2	2.42338	2
Down in 3D biochip	SERPING1	-2.30634	0.13	NA	NANA	NA	3.1132	3.41144	2.80972	2.39194	2.33173	2.2506	2	2
Down in 3D biochip	ENSG00000178921	-2.30236	0.148	PFAS	17p13.1	protein_coding	3.26057	3.07497	2.46094	2	2.82827	2.2506	2.42338	2
Down in 3D biochip	ENSG00000152284	-2.29875	0.175	TCF7L1	2p11.2	protein_coding	2.5512	3.41144	2.2488	2	2	2.2506	2	2.23983
Down in 3D biochip	ENSG00000177459	-2.29739	0.162	ERICH5	8q22.2	protein_coding	3.1132	3.07497	2.2488	2.20924	2.82827	2.2506	2	2
Down in 3D biochip	ENSG00000008517	-2.29451	0.191	IL32	16p13.3	protein_coding	2.7638	3.07497	2.46094	2	2	2.2506	2	2.23983
Down in 3D biochip	RP11-1094M14	-2.29258	0.132	NA	NANA	NA	2.7638	3.68408	2.95687	2	2	2	2.75029	2
Down in 3D biochip	ENSG00000229358	-2.28359	0.18	DPY19L1P1	7p14.3	unprocessed_pseudogene	2.7638	3.07497	2	2	2.60125	2	2	2.44542
Down in 3D biochip	ENSG00000146830	-2.2832	0.139	GIGYF1	7q22.1	protein_coding	3.39427	3.07497	2.95687	2	2.82827	2	2.42338	2.23983
Down in 3D biochip	ENSG00000033170	-2.27778	0.135	FUT8	14q23.3	protein_coding	2.94905	3.68408	2.46094	2.39194	2.33173	2.46405	2	2
Down in 3D biochip	ENSG00000134986	-2.27201	0.13	NREP	5q22.1	protein_coding	3.51663	3.07497	2.46094	2.39194	2.33173	2.46405	2.42338	2
Down in 3D biochip	ENSG00000079819	-2.26833	0.0123	EPB41L2	6q23.2	protein_coding	4.3751	3.9133	2.64584	2.69983	2.33173	2.8146	2.42338	3.29093
Down in 3D biochip	C10ORF35	-2.26632	0.175	NA	NANA	NA	3.1132	3.07497	2.2488	2.55409	2	2.2506	2.42338	2
Down in 3D biochip	ENSG00000196924	-2.26063	4.01e-05	FLNA	Xq28	protein_coding	5.36542	4.70784	3.86197	2.39194	3.73407	3.53458	3.24139	3.66461
Down in 3D biochip	ENSG00000184903	-2.25438	0.0367	IMMP2L	7q31.1	protein_coding	3.1132	5.03447	2.95687	3.16905	3.02437	2.46405	2	2
Down in 3D biochip	ENSG00000176142	-2.25149	0.191	TMEM39A	3q13.33	protein_coding	2.7638	3.07497	2.2488	2	2.82827	2	2	2
Down in 3D biochip	ENSG00000263002	-2.24287	0.185	ZNF234	19q13.31	protein_coding	3.1132	3.07497	2.2488	2.55409	2.33173	2	2.42338	2
Down in 3D biochip	ENSG00000198945	-2.24263	0.074	L3MBTL3	6q23.1	protein_coding	3.51663	3.68408	2.64584	2.39194	2.82827	2.46405	2.75029	2
Down in 3D biochip	ENSG00000112159	-2.23962	0.00539	MDN1	6q15	protein_coding	4.43839	4.28492	2.95687	2.55409	3.35112	2.64995	2.42338	3.18015
Down in 3D biochip	ENSG00000151276	-2.23739	0.000144	MAGI1	3p14.1	protein_coding	4.43839	5.59297	3.70426	3.59886	4.36072	3.79333	3.01664	2
Down in 3D biochip	ENSG00000139354	-2.22861	0.175	GAS2L3	12q23.1	protein_coding	3.26057	3.07497	2.46094	2	2.33173	2.64995	2	2.44542
Down in 3D biochip	MRE11A	-2.22188	0.139	NA	NANA	NA	3.26057	3.41144	2.46094	2	2.82827	2	2.42338	2.92925
Down in 3D biochip	ENSG00000196482	-2.1991	0.0645	ESRRG	1q41	protein_coding	3.51663	3.9133	2.80972	2.69983	3.49038	2.2506	2.42338	2
Down in 3D biochip	ENSG00000141577	-2.18293	0.197	CEP131	17q25.3	protein_coding	2.94905	3.41144	2.2488	2.39194	2.33173	2	2.75029	2
Down in 3D biochip	ENSG00000008256	-2.18123	0.199	CYTH3	7p22.1	protein_coding	2.7638	3.41144	2.80972	2	2	2	2.75029	2
Down in 3D biochip	ENSG00000276234	-2.16418	0.162	TADA2A	17q12	protein_coding	3.26057	3.41144	2.64584	2.55409	2.33173	2.2506	2.42338	2
Down in 3D biochip	ENSG00000171159	-2.16328	0.00359	C9orf16	9q34.11	protein_coding	4.71888	4.28492	3.61842	3.16905	2.33173	3.71213	3.6071	2.23983
Down in 3D biochip	ENSG00000099889	-2.15433	0.073	ARVCF	22q11.21	protein_coding	4.0088	3.41144	2.95687	2.55409	2.33173	2.64995	2	2.78528
Down in 3D biochip	ENSG00000135164	-2.14738	0.139	DMTF1	7q21.12	protein_coding	3.73401	3.07497	2.46094	2.69983	2.33173	2.46405	3.01664	2
Down in 3D biochip	ENSG00000164654	-2.14599	0.191	MIOS	7p21.3	protein_coding	3.39427	3.07497	2.64584	2.20924	2.82827	2.2506	2.42338	2
Down in 3D biochip	ENSG00000137831	-2.1436	0.192	UACA	15q23	protein_coding	3.39427	3.07497	2.80972	2.20924	3.02437	2	2	2.44542
Down in 3D biochip	ENSG00000174469	-2.12262	0.0313	CNTNAP2	7q35	protein_coding	3.62941	4.58016	2.64584	2.69983	2.60125	2.96238	3.01664	2.23983
Down in 3D biochip	ENSG00000118518	-2.1129	0.171	RNF146	6q22.33	protein_coding	3.1132	3.68408	2.80972	2	2.60125	3.09641	2	2.23983
Down in 3D biochip	ENSG00000187720	-2.10662	0.0346	THSD4	15q23	protein_coding	4.0088	4.11105	2.80972	2.95344	3.35112	2.64995	2	2.62534
Down in 3D biochip	PTCHD2	-2.08853	0.162	NA	NANA	NA	3.26057	3.68408	2.46094	2.8322	2	2	3.01664	2.62534
Down in 3D biochip	ENSG00000114115	-2.03582	0.0313	RBP1	3q23	protein_coding	4.08988	4.11105	3.21258	2.55409	2.82827	2.8146	3.7602	2.23983
Down in 3D biochip	ENSG00000149654	-2.01485	0.16	CDH22	20q13.12	protein_coding	3.62941	3.41144	3.09038	2.8322	2.60125	2.46405	2.42338	2
Down in 3D biochip	ENSG00000156531	-1.99414	0.152	PHF6	Xq26.2	protein_coding	3.51663	3.68408	2.64584	3.16905	2.33173	2.96238	2.42338	2
Down in 3D biochip	ENSG00000103489	-1.97849	0.135	XYLT1	16p12.3	protein_coding	3.51663	3.9133	2.80972	3.06527	2.60125	2.2506	2	2.62534
Down in 3D biochip	ENSG00000071051	-1.97821	0.13	NCK2	2q12.2	protein_coding	3.51663	3.9133	2.2488	3.16905	2.33173	2.46405	2.75029	2.44542
Down in 3D biochip	ENSG00000135931	-1.97397	0.107	ARMC9	2q37.1	protein_coding	3.83154	3.68408	2.64584	2.20924	2.60125	3.09641	2.42338	2.92925
Down in 3D biochip	ENSG00000189337	-1.97241	0.0783	KAZN	1p36.21	protein_coding	3.73401	4.11105	2.46094	2.69983	3.19698	2.2506	2.42338	3.18015
Down in 3D biochip	ENSG00000163945	-1.97021	0.178	UVSSA	4p16.3	protein_coding	3.62941	3.41144	2.64584	2.8322	3.02437	2.46405	2	2.23983
Down in 3D biochip	ENSG00000132561	-1.96295	0.139	MATN2	8q22.1	protein_coding	3.62941	3.68408	2.2488	2.55409	2.60125	2.46405	2.75029	2.78528
Down in 3D biochip	MTAP
Down in 3D biochip	ENSG00000162105	-1.94442	0.134	SHANK2	11q13.4	protein_coding	4.23953	3.07497	3.09038	3.06527	3.49038	2.64995	2.42338	2
Down in 3D biochip	ENSG00000182871	-1.93704	0.0504	COL18A1	21q22.3	protein_coding	4.61314	3.41144	3.09038	2.95344	3.49038	2.2506	3.24139	2.62534
Down in 3D biochip	ENSG00000188153	-1.90548	0.199	COL4A5	Xq22.3	protein_coding	3.92289	3.07497	2.80972	2.95344	3.49038	2.46405	2.42338	2
Down in 3D biochip	ENSG00000171345	-1.90464	0.0217	KRT19	17q21.2	protein_coding	4.23953	4.58016	3.21258	3.67135	3.49038	3.79333	3.24139	2
Down in 3D biochip	ENSG00000116117	-1.89545	0.148	PARD3B	2q33.3	protein_coding	3.73401	3.68408	2.95687	2.69983	2.82827	2.64995	2.42338	2.23983
Down in 3D biochip	ENSG00000145934	-1.89323	0.0635	TENM2	5q34	protein_coding	3.73401	4.44008	3.42973	2.95344	3.49038	3.09641	2.75029	2
Down in 3D biochip	ENSG00000172260	-1.89044	0.0369	NEGR1	1p31.1	protein_coding	4.49902	3.9133	2.95687	2.55409	3.35112	3.33207	3.01664	2.78528
Down in 3D biochip	ENSG00000124780	-1.86656	0.0294	KCNK17	6p21.2	protein_coding	4.95362	3.68408	2.95687	3.44195	3.35112	3.21905	3.01664	2.62534
Down in 3D biochip	ENSG00000136944	-1.86284	0.00725	LMX1B	9q33.3	protein_coding	4.9963	4.44008	3.32524	3.86922	4.12457	3.79333	2.75029	2.44542
Down in 3D biochip	ENSG00000264522	-1.84259	0.13	OTUD7B	1q21.2	protein_coding	3.83154	3.9133	2.80972	3.06527	2	3.43687	3.01664	2.44542
Down in 3D biochip	ENSG00000063244	-1.84224	0.162	U2AF2	19q13.42	protein_coding	3.73401	3.68408	2.64584	3.16905	2.33173	3.21905	3.6071	2
Down in 3D biochip	ENSG00000144724	-1.84071	0.0843	PTPRG	3p14.2	protein_coding	3.51663	4.70784	2.95687	3.06527	3.73407	2	3.01664	2.78528
Down in 3D biochip	ENSG00000106484	-1.80634	0.0147	MEST	7q32.2	protein_coding	4.30891	5.12875	3.09038	3.06527	3.19698	3.53458	2.42338	3.82048
Down in 3D biochip	ENSG00000160796	-1.79146	0.0306	NBEAL2	3p21.31	protein_coding	4.61314	4.28492	3.42973	3.44195	3.19698	2.8146	3.01664	2.92925
Down in 3D biochip	ENSG00000075142	-1.78684	0.139	SRI	7q21.12	protein_coding	3.83154	3.9133	2.95687	3.06527	2.82827	2.64995	3.01664	2.23983
Down in 3D biochip	ENSG00000204209	-1.7727	0.188	DAXX	6p21.32	protein_coding	3.62941	3.9133	2.80972	3.06527	2	2.8146	3.4358	2.44542
Down in 3D biochip	ENSG00000124766	-1.74433	0.0958	SOX4	6p22.3	protein_coding	4.08988	4.11105	2.46094	2.55409	2.60125	3.71213	3.24139	3.29093
Down in 3D biochip	ENSG00000163872	-1.73269	0.19	YEATS2	3q27.1	protein_coding	3.73401	3.9133	3.09038	2.69983	3.35112	2.64995	2	2.78528
Down in 3D biochip	ENSG00000142949	-1.69725	0.0367	PTPRF	1p34.2	protein_coding	4.55721	4.44008	3.78527	2.69983	3.84204	3.43687	3.24139	2.78528
Down in 3D biochip	ENSG00000147724	-1.68605	0.135	FAM135B	8q24.23	protein_coding	4.55721	3.41144	2.46094	2.95344	3.49038	2.64995	3.24139	3.29093
Down in 3D biochip	ENSG00000235162	-1.64225	0.19	C12orf75	12q23.3	protein_coding	3.73401	4.11105	2.2488	2.69983	3.49038	3.43687	3.01664	2.62534
Down in 3D biochip	ENSG00000143995	-1.61413	0.077	MEIS1	2p14	protein_coding	4.43839	4.28492	3.09038	3.16905	3.49038	3.43687	3.6071	2.62534
Down in 3D biochip	ENSG00000184840	-1.61012	0.182	TMED9	5q35.3	protein_coding	4.0088	3.9133	3.32524	3.44195	3.35112	3.33207	3.24139	2
Down in 3D biochip	ENSG00000155849	-1.60296	0.186	ELMO1	7p14.1	protein_coding	3.62941	4.44008	2	3.06527	3.49038	3.09641	3.24139	3.39381
Down in 3D biochip	ENSG00000077279	-1.59854	0.0166	DCX	Xq23	protein_coding	4.95362	4.82512	3.70426	4.09683	4.28622	3.62609	4.14099	2.44542
Down in 3D biochip	ENSG00000122786	-1.53404	0.00409	CALD1	7q33	protein_coding	5.54868	5.12875	4.00413	3.52254	4.79616	3.62609	4.14099	4.36729
Down in 3D biochip	ENSG00000148498	-1.51906	0.16	PARD3	10p11.21	protein_coding	4.0088	4.44008	3.52716	2.55409	3.35112	2.8146	3.4358	3.18015
Down in 3D biochip	ENSG00000171603	-1.51755	0.128	CLSTN1	1p36.22	protein_coding	4.16664	4.58016	3.32524	3.26587	3.19698	3.33207	2.75029	3.06015
Down in 3D biochip	ENSG00000113369	-1.4426	0.112	ARRDC3	5q14.3	protein_coding	4.23953	4.93359	3.9348	4.0432	3.49038	2.64995	3.01664	3.06015
Down in 3D biochip	ENSG00000179242	-1.39051	0.162	CDH4	20q13.33	protein_coding	4.55721	4.28492	3.42973	4.09683	3.84204	3.21905	3.24139	2.62534
Down in 3D biochip	ENSG00000167244	-1.37543	6.23e-63	IGF2	11p15.5	protein_coding	9.22109	8.77419	8.31946	7.63508	8.04194	7.53416	7.53486	7.15884
Down in 3D biochip	INS-IGF2
Down in 3D biochip	ENSG00000132780	-1.33365	0.123	NASP	1p34.1	protein_coding	4.16664	5.37945	4.19413	3.35659	3.94249	3.43687	3.4358	2.92925
Down in 3D biochip	ENSG00000111057	-1.30215	5.52e-07	KRT18	12q13.13	protein_coding	6.72022	6.99942	5.76666	5.18842	5.3655	5.39028	5.65492	5.71341
Down in 3D biochip	IGF2
Down in 3D biochip	LARGE	-1.28965	0.0972	NA	NANA	NA	4.76898	5.03447	4.30818	4.54559	4.74144	3.09641	3.6071	2.78528
Down in 3D biochip	STMN1
Down in 3D biochip	IGFBP5	-1.24098	0.0367	NA	NANA	NA	5.49014	5.21725	4.19413	3.52254	4.0364	4.37114	4.5298	5.04164
Down in 3D biochip	ENSG00000185559	-1.2379	0.0245	DLK1	14q32.2	protein_coding	5.42913	5.59297	4.77289	4.09683	4.99638	3.71213	4.5298	4.207
Down in 3D biochip	ENSG00000115414	-1.23555	0.00318	FN1	2q35	protein_coding	6.16861	5.77893	5.52859	4.65689	5.43612	4.5217	4.14099	4.68386
Down in 3D biochip	ENSG00000133026	-1.22257	1.12e-06	MYH10	17p13.1	protein_coding	6.8996	6.97424	5.74657	5.91142	5.40124	5.5853	5.61532	5.69338
Down in 3D biochip	ENSG00000171316	-1.21286	0.162	CHD7	8q12.2	protein_coding	5.11728	4.44008	4.07029	4.38243	3.84204	4.07894	3.7602	2.92925
Down in 3D biochip	MLLT4	-1.20933	0.0504	NA	NANA	NA	5.36542	5.21725	4.60452	3.86922	4.79616	3.94319	4.44197	3.89253
Down in 3D biochip	RBM6
Down in 3D biochip	ENSG00000138801	-1.14691	0.167	PAPSS1	4q25	protein_coding	4.86425	5.03447	4.13354	3.92958	4.0364	4.20301	3.8986	3.39381
Down in 3D biochip	ENSG00000183311	-1.14379	0.121	TUBB	CHR_HSCHR6_MHC_QBL_CTG1	protein_coding	5.19263	5.03447	4.00413	3.35659	4.36072	4.47324	4.76513	4.14935
Down in 3D biochip	SIPA1L3	-1.08349	0.127	NA	NANA	NA	5.33248	5.21725	4.36199	4.62073	4.56361	3.94319	3.6071	4.41699
Down in 3D biochip	ENSG00000170421	-1.07273	0.0285	KRT8	12q13.13	protein_coding	5.60493	6.13752	4.9935	4.14853	4.62535	4.9335	5.02899	4.9433
Down in 3D biochip	CERKL
Down in 3D biochip	ENSG00000113758	-0.797018	0.0409	DBN1	5q35.3	protein_coding	6.8539	6.09144	5.29957	5.81872	5.56776	5.89223	5.80328	6.11079
Down in 3D biochip	ENSG00000100604	-0.569301	1.54e-65	CHGA	14q32.12	protein_coding	10.2497	10.2516	9.69417	9.61659	10.0664	9.57232	10.081	9.19742
Down in 3D biochip	ENSG00000125534	-0.568347	0.16	PPDPF	20q13.33	protein_coding	6.87693	6.8689	6.05503	6.42267	5.97595	6.43814	6.37725	6.18439
Down in 3D biochip	ENSG00000075624	-0.562707	1.81e-10	ACTB	7p22.1	protein_coding	8.63871	9.20048	7.97984	7.76912	8.10832	8.3032	8.78767	8.42631
