# Supplementary material for: Analysis of the transcriptome and metabolome of pancreatic spheroids derived from human induced pluripotent stem cells and matured in an organ-on-a-chip
Source: Royal Society of Chemistry journal article supplement (doi:10.1039/d2mo00132b), 2022-07-12
Supplement: d2mo00132b6.xlsx [file d2mo00132b6.xlsx]

## Sheet: Differentially expressed genes
Regulation	Ensembl ID	log2 Fold Change	Adj.Pval	Symbol	Chr	Type	3D-Petri.1	3D-Petri.2	3D-Petri.3	3D-Petri.4	3D-Biochip.1	3D-Biochip.2	3D-Biochip.3	3D-Biochip.4	3D-Biochip.5	3D-Biochip.6
Down in 3D biochip	ENSG00000100604	-0.490908	8.03e-112	CHGA	14q32.12	protein_coding	10.7502	10.0794	10.2627	10.1238	9.76983	9.68415	10.1481	9.62561	10.1192	9.26047
Down in 3D biochip	INS-IGF2	-1.00785	8.75e-30	INS"	NANA	NA	8.18827	7.99051	8.07293	7.92663	7.07622	6.85678	6.90722	7.2633	7.41547	6.40749
Down in 3D biochip	ENSG00000118271	-1.00218	2.83e-24	TTR	18q12.1	protein_coding	7.47387	7.70988	8.00111	8.11017	6.74374	6.1177	6.60052	7.40411	7.39159	7.30576
Down in 3D biochip	ENSG00000184009	-0.632025	1.08e-06	ACTG1	17q25.3	protein_coding	6.73242	8.04733	7.93657	7.49419	6.43521	6.17109	6.3331	7.79022	7.72347	7.57534
Down in 3D biochip	ENSG00000075624	-0.267365	4.44e-06	ACTB	7p22.1	protein_coding	8.46545	8.86678	8.70986	8.40335	8.05468	7.8358	8.18923	8.3561	8.82565	8.48906
Down in 3D biochip	ENSG00000104722	-1.57006	3.54e-05	NEFM	8p21.2	protein_coding	4.28142	5.2757	5.63718	6.6973	3.83964	4.30054	4.42717	4.86793	4.64471	3.86627
Down in 3D biochip	ENSG00000131016	-1.98636	0.00656	AKAP12	6q25.1	protein_coding	3.29165	4.72671	4.86887	5.29493	3.25629	3.10112	2.34897	3.98302	2.43322	3.93918
Down in 3D biochip	ENSG00000125821	-2.20987	0.01	DTD1	20p11.23	protein_coding	3.96206	3.47924	4.24375	5.02267	3.1312	2.86236	3.06667	2.66961	3.03615	2.24974
Down in 3D biochip	ENSG00000110717	-2.0736	0.0139	NDUFS8	11q13.2	protein_coding	3.29165	4.27246	4.01282	5.37535	3.47799	3.39836	3.54377	3.56988	2.76595	2
Down in 3D biochip	ENSG00000139289	-2.17025	0.0139	PHLDA1	12q21.2	protein_coding	3.29165	3.47924	4.31318	5.40119	2.67374	2.40839	2.62975	3.36459	3.26363	2.81226
Down in 3D biochip	ENSG00000175329	-2.50686	0.0251	ISX	22q12.3	protein_coding	3.29165	3.18723	3.63303	4.6002	2.48213	2.72631	2.34897	2.47898	2.76595	2
Down in 3D biochip	ENSG00000067182	-2.57453	0.0445	TNFRSF1A	12p13.31	protein_coding	2	3.34061	3.52011	3.61494	2.26111	2.2186	2	2.25928	2	2.24974
Down in 3D biochip	ENSG00000198804	-0.391963	0.0644	MT-CO1	MT	protein_coding	7.34273	7.24934	7.13312	7.26712	7.11803	6.47691	6.76926	6.65628	7.22596	6.70796
Down in 3D biochip	ENSG00000131711	-0.583973	0.0749	MAP1B	5q13.2	protein_coding	5.81073	6.56884	6.52045	7.031	5.47488	5.7825	5.70494	5.97874	6.18286	6.89369
Down in 3D biochip	ENSG00000168066	-1.34538	0.0749	SF1	11q13.1	protein_coding	4.28142	4.98123	4.37942	5.11925	4.31267	3.48523	2.62975	4.05314	4.37934	3.3288
Down in 3D biochip	SPAG6	-2.09517	0.0992	SPAG6	NANA	NA	3.77124	2	2	2	2	2	2	2	2	2
Down in 3D biochip	ENSG00000067064	-1.53644	0.115	IDI1	10p15.3	protein_coding	2.97482	3.92969	4.1708	5.80122	3.25629	2.86236	3.24382	3.66251	4.27879	2.81226
Down in 3D biochip	ENSG00000171867	-2.06604	0.117	PRNP	20p13	protein_coding	3.77124	3.34061	3.26369	4.45971	2	2.98667	2.86469	3.36459	2	2.81226
Down in 3D biochip	CERKL	-0.448207	0.127	NEUROD1/CERKL	NANA	NA	6.99515	6.85009	6.73805	6.96323	6.60948	6.60851	6.67967	6.21119	6.34082	5.88717
Down in 3D biochip	ENSG00000077279	-1.26699	0.129	DCX	Xq23	protein_coding	4.54274	4.83397	5.00099	4.35783	3.75737	4.14914	4.35184	3.66251	4.17072	2.46256
Down in 3D biochip	ENSG00000113758	-0.569607	0.139	DBN1	5q35.3	protein_coding	6.16143	6.09526	6.64686	6.57776	5.36805	5.88191	5.64308	5.94225	5.83889	6.17066
Down in 3D biochip	AGT	-2.29375	0.144	RP11-99J16__A.2"	NANA	NA	2.56822	3.18723	2.766	3.70068	2.67374	2.40839	2	2.47898	2	2
Down in 3D biochip	ENSG00000144191	-2.27191	0.148	CNGA3	2q11.2	protein_coding	2.56822	2.59537	2.30278	4.00026	2.26111	2.2186	2	2	2	2.24974
Down in 3D biochip	ENSG00000023902	-2.28326	0.148	PLEKHO1	1q21.2	protein_coding	3.29165	2	3.26369	4.06635	2	2.40839	2	2.25928	2	2.46256
Down in 3D biochip	ENSG00000112972	-0.559627	0.159	HMGCS1	5p12	protein_coding	5.34642	6.45584	6.47573	7.00596	5.59818	5.5999	5.24536	6.2859	6.34082	6.48259
Down in 3D biochip	RP11-482H16.1	-2.24312	0.165	CCDC85A"	NANA	NA	2.97482	2.32818	3.11608	3.85823	2	2	2.34897	2.83796	2	2.46256
Down in 3D biochip	RP11-384F7	-2.23076	0.167	RP11-384F7	NANA	NA	2	2.82072	2.5529	3.52379	2.26111	2	2	2.25928	2	2
Down in 3D biochip	ENSG00000153187	-0.409342	0.178	HNRNPU	1q44	protein_coding	6.47499	6.74408	7.0542	7.20979	6.31093	6.54926	6.23168	6.45083	6.92699	6.67632
Down in 3D biochip	ENSG00000154548	-2.10345	0.178	SRSF12	6q15	protein_coding	3.29165	3.18723	3.52011	3.32213	2.48213	2	2.34897	3.12517	3.03615	2
Down in 3D biochip	ENSG00000169598	-2.16139	0.182	DFFB	1p36.32	protein_coding	2.56822	2.59537	2.5529	3.42648	2	2.57609	2.34897	2	2	2
Down in 3D biochip	ENSG00000108953	-0.28214	0.182	YWHAE	17p13.3	protein_coding	7.57959	7.23962	7.22606	8.07046	7.15063	7.25931	7.14893	7.19516	7.30478	7.51102
Down in 3D biochip	RBBP8	-2.16831	0.185	MIR4741"	NANA	NA	2.56822	2.32818	2.5529	3.93099	2	2.2186	2.34897	2.25928	2	2
Down in 3D biochip	ENSG00000151148	-2.14397	0.189	UBE3B	12q24.11	protein_coding	2.97482	2.82072	2.95163	3.7816	2.67374	2.2186	2.62975	2	2.43322	2
Down in 3D biochip	ENSG00000114686	-1.81129	0.202	MRPL3	3q22.1	protein_coding	3.29165	3.01558	3.73775	4.45971	2.26111	3.20715	3.06667	2.9887	3.63296	2
Down in 3D biochip	ENSG00000114115	-1.65868	0.202	RBP1	3q23	protein_coding	3.29165	3.72197	3.73775	4.35783	3.25629	2.57609	2.86469	2.83796	3.78732	2.24974
Down in 3D biochip	ENSG00000026025	-1.76994	0.205	VIM	10p13	protein_coding	2.97482	3.01558	4.09397	4.6002	2.48213	2.40839	3.06667	2.9887	2.76595	2.64798
Down in 3D biochip	ENSG00000121769	-2.06844	0.207	FABP3	1p35.2	protein_coding	2	3.47924	4.09397	4.06635	2.26111	2.2186	2	2.83796	2.43322	3.09352
Down in 3D biochip	ENSG00000198522	-2.09327	0.212	GPN1	2p23.3	protein_coding	2.97482	2.32818	2.5529	2.24798	2	2	2	2	2	2
Down in 3D biochip	ENSG00000117318	-1.5344	0.217	ID3	1p36.12	protein_coding	2.97482	4.19409	4.01282	4.64415	2.84286	2.40839	2.34897	4.36022	3.26363	3.43345
Down in 3D biochip	ENSG00000213626	-1.48451	0.218	LBH	2p23.1	protein_coding	3.29165	4.34678	4.37942	4.12955	2.48213	2.86236	2.34897	3.56988	3.63296	3.93918
Down in 3D biochip	ENSG00000049769	-2.10919	0.22	PPP1R3F	Xp11.23	protein_coding	2.56822	2.32818	2.766	2.95436	2.26111	2.2186	2	2	2	2
Down in 3D biochip	ENSG00000254647	-1.54893	0.221	INS	11p15.5	protein_coding	3.96206	3.47924	4.01282	4.30406	3.25629	3.30592	2.34897	3.12517	3.26363	2.46256
Down in 3D biochip	ENSG00000147687	-2.04146	0.223	TATDN1	8q24.13	protein_coding	2.97482	2.32818	2.5529	3.61494	2	2	2	2.47898	2.43322	2
Down in 3D biochip	ENSG00000152467	-2.07012	0.223	ZSCAN1	19q13.43	protein_coding	2	2.59537	2.5529	2.64398	2	2	2	2	2	2
Down in 3D biochip	ENSG00000078902	-1.85478	0.228	TOLLIP	11p15.5	protein_coding	3.55129	3.72197	2.95163	4.00026	2.84286	3.10112	3.06667	2.9887	2	2
Down in 3D biochip	ENSG00000164949	-2.05578	0.242	GEM	8q22.1	protein_coding	2	2.59537	2.5529	3.93099	2	2.2186	2	2	2.43322	2
Down in 3D biochip	FBXO18	-2.08303	0.242	FBXO18	NANA	NA	2.97482	2.32818	2.5529	3.7816	2	2.2186	2.34897	2.66961	2	2
Down in 3D biochip	ENSG00000136824	-1.65628	0.242	SMC2	9q31.1	protein_coding	3.55129	3.72197	3.39759	4.12955	3.75737	2.57609	2.86469	2.9887	3.46008	2
Down in 3D biochip	IGF2	-0.34015	0.242	IGF2-INS	NANA	NA	7.48946	7.12814	7.34687	6.87378	7.52472	6.54926	7.35589	6.38438	6.41375	6.15544
Down in 3D biochip	ENSG00000131149	-1.27997	0.244	GSE1	16q24.1	protein_coding	3.29165	4.11123	4.24375	5.18022	2.99422	3.48523	3.40157	3.47088	3.78732	3.21595
Down in 3D biochip	ERI2	-1.97744	0.244	ERI2	NANA	NA	2.56822	2.82072	2.5529	3.70068	2	2.40839	2	2	2.76595	2
Down in 3D biochip	ENSG00000116044	-1.02504	0.244	NFE2L2	2q31.2	protein_coding	4.28142	4.66994	4.50343	5.50016	3.91747	3.39836	3.24382	4.46682	4.72333	4.25696
Down in 3D biochip	ENSG00000198786	-0.396707	0.251	MT-ND5	MT	protein_coding	6.41097	6.43895	6.99205	7.15008	6.20627	6.1177	6.81205	6.64497	6.85897	6.20063
Down in 3D biochip	KLF7	-1.91608	0.257	KLF7	NANA	NA	2.56822	4.11123	2.95163	3.7816	2.26111	2.40839	2	2.9887	2.76595	2.46256
Down in 3D biochip	RP11-204C23	-1.71908	0.257	RP11-204C23	NANA	NA	3.29165	2	2	2	2	2	2	2	2	2
Down in 3D biochip	FPGT-TNNI3K	-1.71908	0.257	FPGT-TNNI3K"	NANA	NA	3.29165	2	2	2	2	2	2	2	2	2
Down in 3D biochip	DMPK	-2.0016	0.272	DMPK	NANA	NA	2.56822	2	2	4.12955	2	2	2	2	2	2
Down in 3D biochip	ENSG00000086589	-1.46884	0.28	RBM22	5q33.1	protein_coding	3.29165	3.6057	4.24375	4.64415	2.84286	3.64469	2	3.12517	2.76595	4.19876
Down in 3D biochip	ENSG00000150893	-1.98325	0.286	FREM2	13q13.3	protein_coding	2.97482	2.32818	2.95163	2.95436	2	2.57609	2.62975	2	2	2
Down in 3D biochip	RLTPR	-1.95925	0.292	RLTPR	NANA	NA	2.97482	2	3.26369	2.64398	2	2	2	2	2.43322	2
Down in 3D biochip	ENSG00000125378	-1.98249	0.295	BMP4	14q22.2	protein_coding	2	2.32818	2.5529	3.32213	2	2	2	2.25928	2	2
Down in 3D biochip	ENSG00000171004	-1.99004	0.297	HS6ST2	Xq26.2	protein_coding	2.97482	2.82072	2.766	3.08765	2	3.10112	2.34897	2.25928	2	2
Up in 3D biochip	ENSG00000251562	0.47541	1.26e-195	MALAT1	11q13.1	lincRNA	9.95781	9.7226	9.82385	9.82172	10.2316	10.2093	10.354	10.1373	10.1462	10.1055
Up in 3D biochip	ENSG00000248049	3.07704	8.63e-06	UBA6-AS1	4q13.2	antisense	2	2	2	2	2.99422	3.71827	3.67319	2.47898	2.76595	2.81226
Up in 3D biochip	ENSG00000109472	1.0255	0.000168	CPE	4q32.3	protein_coding	5.53845	5.2757	5.99503	5.45152	6.93365	6.65609	6.66419	6.18019	5.94112	6.15544
Up in 3D biochip	ENSG00000104228	2.76789	0.00054	TRIM35	8p21.2	protein_coding	2	2	2	2	2.48213	2.57609	3.67319	2.83796	2.43322	3.53103
Up in 3D biochip	ENSG00000111640	1.66405	0.000676	GAPDH	12p13.31	protein_coding	4.76391	5.11485	4.67149	2.64398	5.5004	4.85137	5.47574	5.21241	5.94112	5.09755
Up in 3D biochip	ENSG00000197122	2.54824	0.00686	SRC	20q11.23	protein_coding	2	2	2	2	2.84286	2.72631	2.86469	2.25928	2.43322	3.62242
Up in 3D biochip	FTL	0.557836	0.00707	FTL	NANA	NA	6.37785	7.10691	6.64686	6.44741	6.9148	6.97406	6.51677	7.2633	7.77051	7.34654
Up in 3D biochip	GMDS-AS1	2.43542	0.0165	GMDS-AS1	NANA	NA	2	2	2	2	3.57725	3.10112	3.24382	2.83796	2.43322	2
Up in 3D biochip	ENSG00000081721	2.46404	0.0213	DUSP12	1q23.3	protein_coding	2	2	2.30278	2	2.99422	3.10112	3.06667	2.47898	2.43322	3.43345
Up in 3D biochip	ENSG00000139946	2.60619	0.0213	PELI2	14q22.3	protein_coding	2	3.82957	3.83539	2	4.62256	4.52216	4.49877	3.74956	3.26363	3.70836
Up in 3D biochip	ENSG00000113448	0.986099	0.0251	PDE4D	5q12.1	protein_coding	6.2737	5.07167	4.86887	4.6002	6.64423	6.60851	6.64853	5.18143	4.79789	4.96416
Up in 3D biochip	ENSG00000144674	1.64334	0.0282	GOLGA4	3p22.2	protein_coding	4.41799	3.82957	4.09397	2.64398	4.62256	4.74976	4.27235	4.90632	4.05389	5.35904
Up in 3D biochip	ENSG00000131981	2.14323	0.0282	LGALS3	14q22.3	protein_coding	3.29165	3.6057	4.50343	2	4.31267	3.85504	4.49877	4.2451	4.47332	4.19876
Up in 3D biochip	UQCR11	2.32015	0.0282	UQCR11	NANA	NA	2	2	2	2	2.67374	2.57609	3.24382	2.47898	2.76595	2.46256
Up in 3D biochip	ENSG00000151692	2.35318	0.0282	RNF144A	2p25.1	protein_coding	2	2	2	2	2.48213	2.72631	3.67319	2.47898	2	3.09352
Up in 3D biochip	ENSG00000162191	1.98623	0.0282	UBXN1	11q12.3	protein_coding	4.28142	4.72671	3.52011	2	4.36916	4.09492	4.56698	4.4145	3.92675	4.19876
Up in 3D biochip	ENSG00000005175	2.64786	0.0341	RPAP3	12q13.11	protein_coding	2	3.18723	2.766	2	3.57725	3.64469	3.40157	3.36459	3.63296	4.19876
Up in 3D biochip	ENSG00000116678	2.328	0.037	LEPR	1p31.3	protein_coding	2	2	2	2	2.67374	3.39836	2.34897	2.9887	2	2.64798
Up in 3D biochip	LINC00473	2.57527	0.039	LINC00473	NANA	NA	2.56822	2	2.766	2.64398	4.52647	4.14914	3.90169	3.24984	3.26363	3.86627
Up in 3D biochip	ENSG00000152270	1.51237	0.0391	PDE3B	11p15.2	protein_coding	3.55129	3.6057	4.1708	3.70068	5.25266	5.76525	5.43981	4.61327	4.93635	3.93918
Up in 3D biochip	ENSG00000230590	2.32856	0.0413	FTX	Xq13.2	lincRNA	2	3.6057	3.11608	2.45953	4.87751	4.43756	4.69443	3.74956	3.03615	4.0748
Up in 3D biochip	ENSG00000047056	2.28997	0.0507	WDR37	10p15.3	protein_coding	2	2.32818	2	2	2.48213	2.86236	3.06667	2.83796	2.43322	3.62242
Up in 3D biochip	ENSG00000130635	2.2922	0.0547	COL5A1	9q34.3	protein_coding	2	2.59537	2	2	2.84286	2.98667	3.79196	2.47898	3.26363	2.81226
Up in 3D biochip	ENSG00000103657	2.02655	0.0547	HERC1	15q22.31	protein_coding	4.13056	3.18723	2.5529	2.45953	4.06157	3.91885	4.49877	4.18391	3.92675	4.3129
Up in 3D biochip	ENSG00000145730	1.1637	0.0628	PAM	5q21.1	protein_coding	4.54274	4.19409	4.24375	4.45971	5.36805	5.5803	5.1596	4.90632	5.00089	5.58033
Up in 3D biochip	ENSG00000172943	2.23128	0.0644	PHF8	Xp11.22	protein_coding	2	2.32818	2	2	3.37139	2.72631	2.86469	2.83796	3.03615	2.46256
Up in 3D biochip	ENSG00000071553	1.88583	0.0674	ATP6AP1	Xq28	protein_coding	2.56822	4.11123	4.1708	2.24798	4.36916	4.30054	4.49877	4.18391	3.92675	4.51722
Up in 3D biochip	ENSG00000175497	1.42326	0.0674	DPP10	2q14.1	protein_coding	3.96206	4.19409	4.61761	2.8075	5.19131	5.11923	5.51079	4.61327	4.64471	3.93918
Up in 3D biochip	ENSG00000077943	2.1838	0.0749	ITGA8	10p13	protein_coding	2	2	2	2	2.48213	2.86236	2.62975	2.83796	2	2.81226
Up in 3D biochip	CTC-260E6	2.18429	0.0749	CTC-260E6	NANA	NA	2	2.32818	2	2	3.25629	2.72631	2.86469	2.47898	3.26363	2.64798
Up in 3D biochip	C9ORF156	2.18364	0.0749	C9ORF156	NANA	NA	2	2.32818	2	2	2.48213	2.57609	2.86469	2.66961	3.63296	3.21595
Up in 3D biochip	ENSG00000113838	2.18077	0.0749	TBCCD1	3q27.3	protein_coding	2	2	2	2	2.67374	2.57609	3.24382	2	2.43322	3.43345
Up in 3D biochip	RIMBP2	2.47374	0.0749	NA	NANA	NA	2	3.18723	2.95163	2	3.75737	3.85504	3.79196	3.12517	3.03615	3.78947
Up in 3D biochip	ENSG00000120899	2.14225	0.0909	PTK2B	8p21.2	protein_coding	2	2	2	2	2.48213	3.10112	2.62975	2.25928	2.43322	2.64798
Up in 3D biochip	COMMD1	2.17894	0.0922	COMMD1	NANA	NA	2	2.32818	2	2	3.1312	3.56716	2.86469	2.25928	2.43322	2.81226
Up in 3D biochip	ERO1LB	1.61325	0.0966	ERO1LB	NANA	NA	3.55129	4.66994	4.01282	2.24798	4.83803	4.25182	4.42717	3.74956	4.56156	4.65346
Up in 3D biochip	S100A10	2.35197	0.0992	S100A10	NANA	NA	2	3.34061	3.39759	2	3.99132	3.10112	3.67319	3.90932	3.46008	3.86627
Up in 3D biochip	ENSG00000171723	2.33562	0.111	GPHN	14q23.3	protein_coding	2.97482	2.32818	3.11608	2	3.67012	3.91885	4.00365	3.66251	3.46008	3.09352
Up in 3D biochip	ENSG00000117280	2.14522	0.111	RAB29	1q32.1	protein_coding	2	2	2.30278	2	2.67374	2.57609	2.62975	2.83796	2.76595	3.09352
Up in 3D biochip	DSCR3	2.17361	0.128	DSCR3	NANA	NA	2	2	2.5529	2	2.67374	3.39836	2	3.47088	3.03615	2.95974
Up in 3D biochip	ENSG00000204356	2.13047	0.128	NELFE	6p21.33	protein_coding	2.97482	3.47924	3.11608	2	3.47799	3.91885	3.54377	3.36459	3.92675	4.46879
Up in 3D biochip	SDK1	0.782727	0.129	SDK1	NANA	NA	4.86296	5.86174	5.90794	4.68679	6.49989	6.79009	6.3907	5.46478	5.43389	4.99868
Up in 3D biochip	ENSG00000120314	2.06305	0.129	WDR55	5q31.3	protein_coding	2	2	2	2	2.67374	2.57609	2.34897	2.83796	2.76595	2.24974
Up in 3D biochip	ENSG00000144021	2.06459	0.139	CIAO1	2q11.2	protein_coding	4.13056	3.01558	2.95163	2	3.25629	3.78827	4.27235	3.56988	3.26363	4.36676
Up in 3D biochip	ENSG00000144834	2.05061	0.139	TAGLN3	3q13.2	protein_coding	2	2	2	2	2.67374	2.40839	2.62975	2.25928	2.43322	2.95974
Up in 3D biochip	ENSG00000089775	2.11062	0.139	ZBTB25	14q23.3	protein_coding	2	2	2	2.24798	2.67374	2.57609	2.34897	2.66961	2.76595	3.21595
Up in 3D biochip	ENSG00000184611	1.83654	0.142	KCNH7	2q24.2	protein_coding	3.77124	4.11123	3.52011	2	4.31267	3.91885	4.18822	3.66251	3.78732	3.78947
Up in 3D biochip	ENSG00000091428	1.81971	0.144	RAPGEF4	2q31.1	protein_coding	3.55129	4.11123	3.83539	2	3.83964	4.39331	4.18822	3.83165	3.63296	3.86627
Up in 3D biochip	ENSG00000185825	1.31935	0.147	BCAP31	Xq28	protein_coding	4.95564	4.11123	3.63303	2.8075	4.6683	4.14914	4.63211	4.4145	5.12192	4.73763
Up in 3D biochip	ENSG00000076513	2.01205	0.148	ANKRD13A	12q24.11	protein_coding	2	2	2	2	2.48213	2.40839	3.06667	2.47898	2.43322	2.46256
Up in 3D biochip	ENSG00000162961	2.25016	0.148	DPY30	2p22.3	protein_coding	2	2.82072	2.5529	2	2.84286	3.56716	3.40157	2.83796	3.63296	3.21595
Up in 3D biochip	ENSG00000185352	0.908671	0.148	HS6ST3	13q32.1	protein_coding	5.27628	5.15677	5.1974	3.85823	5.83722	5.86581	6.31338	5.01572	4.56156	4.92879
Up in 3D biochip	ENSG00000176018	2.23145	0.148	LYSMD3	5q14.3	protein_coding	2.97482	3.34061	2.30278	2	3.37139	4.09492	3.40157	3.74956	3.78732	3.09352
Up in 3D biochip	FAM134A	2.03331	0.148	FAM134A	NANA	NA	2	2	2	2	2.26111	2.57609	2	2.66961	2.76595	3.43345
Up in 3D biochip	ENSG00000176406	0.881853	0.148	RIMS2	8q22.3	protein_coding	5.20255	5.6134	5.1974	3.7816	5.6674	5.69409	6.12259	5.72318	4.93635	4.73763
Up in 3D biochip	ENSG00000139182	1.57325	0.149	CLSTN3	12p13.31	protein_coding	3.29165	3.6057	4.1708	2.45953	3.99132	4.03858	3.90169	4.36022	4.72333	4.89253
Up in 3D biochip	ENSG00000089199	0.395742	0.151	CHGB	20p12.3	protein_coding	7.01682	6.45584	7.0542	6.57776	6.8957	7.22186	7.28678	6.75425	6.91028	7.09058
Up in 3D biochip	ENSG00000254349	2.00951	0.157	MIR2052HG	8q21.11	lincRNA	2	2	2	2	2.67374	2.57609	3.24382	2.47898	2	2.46256
Up in 3D biochip	P4HA2	1.86302	0.159	P4HA2	NANA	NA	4.28142	3.18723	3.52011	2	3.67012	3.78827	3.90169	3.24984	4.37934	4.19876
Up in 3D biochip	ENSG00000179218	0.581982	0.166	CALR	19p13.13	protein_coding	6.23724	6.13775	6.29875	5.08777	6.28179	6.00462	6.21051	6.31473	5.94112	6.67632
Up in 3D biochip	ENSG00000183775	2.11395	0.167	KCTD16	5q31.3	protein_coding	2.56822	3.47924	2.95163	2	3.75737	3.97996	4.09889	3.36459	3.46008	3.21595
Up in 3D biochip	ENSG00000166024	2.07024	0.167	R3HCC1L	10q24.2	protein_coding	2	2	3.11608	2	3.1312	3.10112	3.06667	2.66961	2.76595	2.64798
Up in 3D biochip	ENSG00000165280	0.941045	0.167	VCP	9p13.3	protein_coding	5.27628	5.31325	5.3373	3.20965	4.98987	5.17256	5.24536	5.56418	4.86878	5.48614
Up in 3D biochip	ENSG00000163932	1.9863	0.176	PRKCD	3p21.1	protein_coding	2	2	2	2	2.48213	2.72631	2.34897	2.9887	2	2.64798
Up in 3D biochip	ENSG00000106976	2.19654	0.178	DNM1	9q34.11	protein_coding	2.56822	2.59537	2.30278	2	3.1312	3.39836	3.67319	3.36459	2.76595	3.43345
Up in 3D biochip	ENSG00000164418	2.11282	0.178	GRIK2	6q16.3	protein_coding	2.97482	2.82072	2.30278	2.24798	4.36916	4.03858	4.00365	3.24984	3.03615	3.09352
Up in 3D biochip	ENSG00000099139	2.1689	0.178	PCSK5	9q21.13	protein_coding	2	2.32818	2.30278	2.24798	3.47799	3.30592	2.86469	2.66961	3.26363	3.09352
Up in 3D biochip	ENSG00000162869	2.00706	0.178	PPP1R21	2p16.3	protein_coding	2	2	2.30278	2	3.1312	2.98667	3.24382	2.47898	2.43322	2.24974
Up in 3D biochip	ENSG00000157837	2.21241	0.178	SPPL3	12q24.31	protein_coding	2	2.59537	2.95163	2	3.1312	3.85504	3.40157	2.66961	3.26363	3.21595
Up in 3D biochip	ENSG00000135090	2.20093	0.179	TAOK3	12q24.23	protein_coding	2	2.59537	2.766	2	3.25629	3.71827	3.24382	2.47898	2.76595	3.62242
Up in 3D biochip	ENSG00000133477	1.96953	0.182	FAM83F	22q13.1	protein_coding	2	2	2	2	2.48213	2.57609	2.62975	2.25928	2	3.43345
Up in 3D biochip	ENSG00000150787	2.11355	0.182	PTS	11q23.1	protein_coding	2	2.82072	2.30278	2	2.67374	2.72631	3.24382	2.9887	3.63296	3.3288
Up in 3D biochip	ENSG00000152778	2.03959	0.185	IFIT5	10q23.31	protein_coding	2	2	2	2.64398	2.99422	2.57609	2.34897	2.83796	2.76595	3.21595
Up in 3D biochip	C18ORF8	2.00164	0.185	C18ORF8	NANA	NA	2	2.59537	2	2	2.48213	2.57609	3.40157	2.9887	2.43322	3.09352
Up in 3D biochip	ZCCHC6	1.81405	0.185	ZCCHC6	NANA	NA	2.97482	3.01558	3.52011	2.24798	3.47799	3.64469	3.79196	4.4145	4.05389	4.0748
Up in 3D biochip	KC6	1.7547	0.185	KC6	NANA	NA	5.04272	3.72197	2.95163	2	3.83964	4.20139	3.54377	3.83165	3.46008	3.70836
Up in 3D biochip	ENSG00000138468	2.06383	0.185	SENP7	3q12.3	protein_coding	2	2.59537	2.30278	2	3.57725	2.57609	2.86469	2.66961	2.76595	3.3288
Up in 3D biochip	ENSG00000171044	2.18148	0.185	XKR6	8p23.1	protein_coding	2	3.01558	3.11608	2	3.47799	3.48523	4.27235	3.47088	3.03615	2.81226
Up in 3D biochip	HSPE1-MOB4	2.00791	0.185	MOB4"	NANA	NA	2	2.82072	2	2	2.48213	2.72631	2.86469	2.83796	3.03615	3.21595
Up in 3D biochip	ENSG00000136770	1.99474	0.205	DNAJC1	10p12.31	protein_coding	2	3.01558	2.766	2.64398	3.47799	3.71827	3.90169	3.83165	3.78732	3.70836
Up in 3D biochip	ENSG00000171189	2.15476	0.212	GRIK1	21q21.3	protein_coding	2.97482	2.32818	2.766	2	4.12856	4.39331	3.90169	3.24984	2.43322	2.64798
Up in 3D biochip	ENSG00000153879	1.85515	0.214	CEBPG	19q13.11	protein_coding	3.55129	3.6057	3.11608	2	3.75737	4.09492	3.24382	3.12517	4.47332	3.78947
Up in 3D biochip	ENSG00000164031	2.11931	0.214	DNAJB14	4q23	protein_coding	2	3.18723	3.39759	2	2.67374	3.30592	3.79196	3.24984	3.26363	4.77794
Up in 3D biochip	ENSG00000185009	2.03034	0.22	AP3M1	10q22.2	protein_coding	2.56822	3.01558	3.26369	2	3.91747	3.64469	3.40157	3.36459	3.03615	3.70836
Up in 3D biochip	ENSG00000049860	2.02709	0.22	HEXB	5q13.3	protein_coding	2.97482	2	2.5529	2	3.67012	2.98667	3.79196	2.9887	3.26363	2.95974
Up in 3D biochip	ENSG00000182050	2.08027	0.22	MGAT4C	12q21.32	protein_coding	2.56822	3.01558	2.766	2	3.57725	3.64469	4.09889	3.36459	3.63296	2.81226
Up in 3D biochip	ENSG00000135506	1.128	0.22	OS9	12q13.3	protein_coding	5.04272	4.11123	4.95828	2.64398	4.62256	4.30054	4.35184	4.61327	5.00089	5.24863
Up in 3D biochip	ENSG00000004866	1.90155	0.22	ST7	7q31.2	protein_coding	2	2	2	2	2.84286	2.72631	2.86469	2.47898	2	2.24974
Up in 3D biochip	ENSG00000165102	1.88764	0.221	HGSNAT	8p11.21	protein_coding	2	2	2	2	2.48213	2.40839	2.62975	2.47898	2.43322	2.46256
Up in 3D biochip	ENSG00000273294	1.89689	0.222	C1QTNF3-AMACR	5p13.2	protein_coding	2	2	2	2	2.84286	2.86236	2.34897	2.47898	2	2.46256
Up in 3D biochip	LLFOS-48D6.2	1.9465	0.222	SPPL2B"	NANA	NA	2	2	2.30278	2	2.99422	2.98667	2.86469	2.83796	2	2.46256
Up in 3D biochip	ENSG00000164144	1.95555	0.223	ARFIP1	4q31.3	protein_coding	2	3.18723	2	2	3.25629	3.10112	2.86469	2.9887	3.03615	2.24974
Up in 3D biochip	ENSG00000138162	1.32107	0.223	TACC2	10q26.13	protein_coding	3.55129	3.92969	4.01282	2.8075	4.12856	4.78443	4.91983	4.4145	4.47332	3.93918
Up in 3D biochip	ENSG00000186073	1.87096	0.228	C15orf41	15q14	protein_coding	2	2	2	2	2.26111	3.30592	3.06667	2.25928	3.03615	2
Up in 3D biochip	ENSG00000128536	1.19434	0.228	CDHR3	7q22.3	protein_coding	4.28142	3.34061	3.83539	3.7816	4.95338	5.17256	5.36514	4.56608	3.92675	3.93918
Up in 3D biochip	ENSG00000149084	1.91465	0.228	HSD17B12	11p11.2	protein_coding	3.29165	3.01558	3.26369	2	3.75737	4.14914	4.18822	3.47088	3.26363	2.95974
Up in 3D biochip	ENSG00000144824	1.98069	0.228	PHLDB2	3q13.2	protein_coding	3.55129	2.82072	2.766	2	3.37139	3.56716	3.79196	3.56988	3.26363	3.53103
Up in 3D biochip	ENSG00000124155	1.1726	0.228	PIGT	20q13.12	protein_coding	4.65756	4.34678	4.09397	2.8075	4.31267	4.52216	4.56698	4.65895	3.92675	5.30489
Up in 3D biochip	RPE	2.02517	0.231	RPE	NANA	NA	2.56822	2.59537	3.52011	2	3.75737	3.20715	3.67319	3.47088	3.26363	3.53103
Up in 3D biochip	ENSG00000155008	1.94087	0.235	APOOL	Xq21.1	protein_coding	2	2	2.95163	2	2.99422	2.40839	2.86469	3.12517	2.76595	2.81226
Up in 3D biochip	ENSG00000111328	1.86275	0.235	CDK2AP1	12q24.31	protein_coding	2	2	2	2	2.48213	2.40839	2.34897	2.47898	2.43322	2.64798
Up in 3D biochip	ENSG00000144218	1.65512	0.241	AFF3	2q11.2	protein_coding	2.56822	3.72197	3.92683	2.24798	4.36916	4.48048	4.75417	2.9887	3.46008	3.93918
Up in 3D biochip	ENSG00000112304	1.56388	0.242	ACOT13	6p22.3	protein_coding	3.77124	3.6057	3.39759	2.24798	4.12856	4.30054	3.67319	4.18391	3.63296	3.70836
Up in 3D biochip	SPECC1L	1.75882	0.242	SPECC1L-ADORA2A"	NANA	NA	3.77124	3.34061	3.52011	2	3.83964	3.85504	4.27235	3.74956	3.03615	3.43345
Up in 3D biochip	ENSG00000156011	1.42706	0.244	PSD3	8p22	protein_coding	2.56822	4.34678	4.37942	2.45953	4.06157	4.48048	4.56698	3.98302	4.05389	4.36676
Up in 3D biochip	ENSG00000171475	1.97402	0.244	WIPF2	17q21.2	protein_coding	2	3.34061	2	2	2.67374	3.10112	3.06667	3.12517	2	3.43345
Up in 3D biochip	ENSG00000242247	1.91471	0.246	ARFGAP3	22q13.2	protein_coding	2	2.32818	2.30278	2	2.67374	3.20715	2.86469	2.66961	2.76595	2.64798
Up in 3D biochip	ENSG00000093010	1.90338	0.246	COMT	22q11.21	protein_coding	2	2.32818	2.30278	2	2.67374	2.72631	2.86469	2.83796	3.26363	2.64798
Up in 3D biochip	RP11-463D19.2	1.8477	0.246	UBE2W"	NANA	NA	2.56822	2.32818	2	2	2.99422	3.10112	3.06667	2.83796	2.76595	3.21595
Up in 3D biochip	ENSG00000012174	1.83966	0.249	MBTPS2	Xp22.12	protein_coding	2	2	2	2	2.67374	2.72631	2.62975	2	2.76595	2.46256
Up in 3D biochip	ENSG00000125648	1.83875	0.249	SLC25A23	19p13.3	protein_coding	2	2	2	2	2.48213	2.86236	2.62975	2.25928	2.43322	2.24974
Up in 3D biochip	ENSG00000100567	2.05321	0.256	PSMA3	14q23.1	protein_coding	2	3.18723	2.95163	2	3.37139	3.20715	3.24382	3.24984	2.76595	3.78947
Up in 3D biochip	ENSG00000177200	1.5175	0.257	CHD9	16q12.2	protein_coding	3.77124	3.01558	3.52011	2.45953	3.47799	4.25182	3.90169	4.18391	4.17072	4.00858
Up in 3D biochip	ENSG00000196188	1.92654	0.257	CTSE	1q32.1	protein_coding	2	2.82072	2	2	2.99422	3.10112	2.62975	2.47898	2	3.70836
Up in 3D biochip	ENSG00000163257	1.88785	0.257	DCAF16	4p15.31	protein_coding	3.29165	3.01558	3.11608	2	2.99422	3.20715	3.54377	3.47088	3.63296	4.69616
Up in 3D biochip	ENSG00000140153	1.94549	0.257	WDR20	14q32.31	protein_coding	2	2	3.39759	2	2.99422	3.10112	2.62975	3.12517	3.03615	2.46256
Up in 3D biochip	ENSG00000082068	1.86706	0.257	WDR70	5p13.2	protein_coding	3.77124	3.47924	2.5529	2	4.06157	3.48523	3.67319	3.56988	3.03615	3.3288
Up in 3D biochip	KCTD14	1.85725	0.257	NDUFC2"	NANA	NA	3.29165	2.82072	2.5529	2.24798	3.47799	3.64469	3.67319	3.98302	3.03615	3.70836
Up in 3D biochip	C12ORF79	1.90673	0.263	C12ORF79	NANA	NA	2	2.82072	2	2	3.37139	2.98667	4.09889	2.47898	2	2.46256
Up in 3D biochip	ENSG00000196935	1.87151	0.264	SRGAP1	12q14.2	protein_coding	2	2	2	2.24798	2.67374	2.57609	2.62975	2.25928	2.76595	2.81226
Up in 3D biochip	ENSG00000164151	1.97438	0.272	ICE1	5p15.32	protein_coding	2	2	2.30278	2.64398	3.25629	2.72631	3.24382	3.12517	2.43322	2.81226
Up in 3D biochip	ENSG00000173064	1.57366	0.273	HECTD4	12q24.13	protein_coding	3.29165	3.34061	3.11608	2.45953	4.36916	3.97996	4.49877	3.83165	3.46008	3.43345
Up in 3D biochip	ENSG00000221978	2.00428	0.276	CCNL2	1p36.33	protein_coding	2.56822	2.59537	2.30278	2	3.1312	3.10112	3.54377	3.66251	3.03615	2.81226
Up in 3D biochip	ENSG00000134780	1.99089	0.28	DAGLA	11q12.2	protein_coding	2.56822	2	3.26369	2	2.84286	2.86236	3.90169	3.12517	3.46008	3.21595
Up in 3D biochip	ENSG00000135709	2.041	0.283	KIAA0513	16q24.1	protein_coding	2	3.34061	2.30278	2	3.25629	2.98667	3.40157	3.24984	2	3.86627
Up in 3D biochip	ENSG00000080371	1.80314	0.283	RAB21	12q21.1	protein_coding	2	2	2	2	2.48213	2.86236	2.34897	3.12517	2.43322	2
Up in 3D biochip	ENSG00000109762	1.9097	0.283	SNX25	4q35.1	protein_coding	2	2.32818	2.5529	2	2.67374	2.86236	3.06667	2.83796	2.76595	2.95974
Up in 3D biochip	UFD1L	1.68288	0.285	UFD1L	NANA	NA	3.55129	3.6057	2.5529	2.24798	3.37139	3.85504	3.54377	3.74956	3.46008	4.25696
Up in 3D biochip	ENSG00000102181	1.50607	0.286	CD99L2	Xq28	protein_coding	2.97482	3.72197	4.01282	2.24798	3.99132	3.48523	4.42717	3.90932	3.78732	4.36676
Up in 3D biochip	ENSG00000226608	1.56994	0.286	FTLP3	20p13	processed_pseudogene	3.29165	3.47924	3.39759	2.24798	3.67012	3.71827	3.67319	4.18391	4.17072	3.86627
Up in 3D biochip	ENSG00000114388	1.79578	0.286	NPRL2	3p21.31	protein_coding	2	2	2	2	3.1312	2.40839	2.62975	2.66961	2.43322	2
Up in 3D biochip	ENSG00000126016	1.79543	0.294	AMOT	Xq23	protein_coding	2	2	2	2	2	2.72631	2.34897	2.25928	2.43322	3.62242
Up in 3D biochip	ENSG00000137486	1.86008	0.294	ARRB1	11q13.4	protein_coding	2	2	2.30278	2.24798	2.84286	2.57609	2.86469	2.66961	2.76595	2.81226
Up in 3D biochip	ENSG00000112541	1.33283	0.294	PDE10A	6q27	protein_coding	3.29165	3.01558	3.39759	4.00026	5.75481	5.61923	5.43981	3.47088	3.03615	3.43345
Up in 3D biochip	ENSG00000124762	1.84242	0.295	CDKN1A	6p21.2	protein_coding	3.55129	3.18723	2.766	2	3.57725	4.09492	2.62975	3.98302	4.56156	2.81226
Up in 3D biochip	ENSG00000089280	1.97134	0.295	FUS	16p11.2	protein_coding	2.97482	2.32818	2.95163	2	2.99422	3.10112	4.09889	3.56988	2.76595	3.62242
Up in 3D biochip	GCNT3	1.94221	0.295	GCNT3	NANA	NA	2	2.32818	2.766	2	2.84286	2.72631	2.62975	2.83796	2.76595	3.78947
Up in 3D biochip	ENSG00000137842	1.78711	0.295	TMEM62	15q15.2	protein_coding	2	2	2	2	2.26111	2.72631	2	2.83796	2.43322	2.64798
Up in 3D biochip	ENSG00000173805	1.84116	0.296	HAP1	17q21.2	protein_coding	2	2	2.5529	2	2.67374	2.40839	3.06667	2.47898	2.76595	2.95974
Up in 3D biochip	ENSG00000231721	1.76177	0.297	LINC-PINT	7q32.3	processed_transcript	2	3.6057	2.30278	3.32213	3.1312	3.48523	3.54377	4.70324	3.78732	4.3129
Up in 3D biochip	ENSG00000082996	1.8666	0.297	RNF13	3q25.1	protein_coding	2.97482	3.34061	2.766	2	3.83964	3.30592	3.67319	3.74956	3.78732	2.81226

## Sheet: GOBP
	Direction	adj.Pval	nGenes	Pathways	Genes
1	Down regulated in 3D biochip	0.00268779	6	Regulation of lipid biosynthetic process	FABP3 SF1 INS IDI1 TNFRSF1A HMGCS1
2	Down regulated in 3D biochip	0.005397	5	Postsynapse organization	ACTB DBN1 PRNP ACTG1 INS
3	Down regulated in 3D biochip	0.005397	3	Negative regulation of stem cell differentiation	NFE2L2 HNRNPU LBH
4	Down regulated in 3D biochip	0.005397	3	Isoprenoid biosynthetic process	IDI1 HMGCS1 RBP1
5	Down regulated in 3D biochip	0.005397	8	Response to inorganic substance	PRNP HMGCS1 NFE2L2 MAP1B CNGA3 ACTG1 MT-ND5 MT-CO1
6	Down regulated in 3D biochip	0.005397	10	Response to organonitrogen compound	PRNP INS HMGCS1 NFE2L2 FABP3 MAP1B CNGA3 MT-ND5 VIM ACTB
7	Down regulated in 3D biochip	0.005397	10	Response to lipid	HNRNPU HMGCS1 RBP1 ID3 FABP3 MAP1B CNGA3 LBH VIM BMP4
8	Down regulated in 3D biochip	0.00783009	10	Response to drug	RBM22 HMGCS1 NFE2L2 FABP3 MAP1B PRNP MT-ND5 VIM ACTB INS
9	Up regulated in 3D biochip	0.00111796	34	Protein localization	RAB21 RAB29 OS9 ARFIP1 VCP GPHN HAP1 BCAP31 ANKRD13A CPE GAPDH AMOT LGALS3 DNAJC1 GOLGA4 DPP10 CALR ITGA8 RAPGEF4 SNX25 CDKN1A ARRB1 CLSTN3 PAM GRIK2 RIMS2 AP3M1 SRC ARFGAP3 PCSK5 PHLDB2 PRKCD ICE1 ATP6AP1
10	Up regulated in 3D biochip	0.00137102	32	Regulation of localization	PDE4D AMOT RIMS2 SRGAP1 ANKRD13A RAB21 GAPDH PTK2B LGALS3 DNAJC1 ARFIP1 DPP10 BCAP31 ATP6AP1 RAPGEF4 COMT CD99L2 DNM1 RAB29 SLC25A23 ARRB1 CLSTN3 PAM HAP1 CALR KCNH7 SRC TBCCD1 OS9 PHLDB2 PRKCD ICE1
11	Up regulated in 3D biochip	0.00137102	35	Macromolecule localization	RAB21 RAB29 OS9 ARFIP1 VCP GPHN HAP1 BCAP31 ANKRD13A CPE GAPDH AMOT LGALS3 DNAJC1 GOLGA4 DPP10 CALR HEXB ITGA8 RAPGEF4 SNX25 CDKN1A ARRB1 CLSTN3 PAM GRIK2 RIMS2 AP3M1 SRC ARFGAP3 PCSK5 PHLDB2 PRKCD ICE1 ATP6AP1
12	Up regulated in 3D biochip	0.00137102	17	Regulation of cellular localization	RIMS2 ANKRD13A LGALS3 DPP10 BCAP31 RAPGEF4 DNM1 PDE4D RAB29 PTK2B ARRB1 HAP1 SRC RAB21 OS9 PRKCD ICE1
13	Up regulated in 3D biochip	0.00185469	25	Regulation of transport	RIMS2 RAB21 GAPDH PTK2B LGALS3 DNAJC1 ARFIP1 BCAP31 ATP6AP1 RAPGEF4 COMT DNM1 PDE4D RAB29 ARRB1 PAM HAP1 CALR KCNH7 SRC ANKRD13A OS9 PRKCD ICE1 DPP10
14	Up regulated in 3D biochip	0.00325518	32	Cellular localization	RAB21 DNM1 RAB29 OS9 ARFIP1 VCP WIPF2 GPHN HAP1 RIMS2 BCAP31 ARFGAP3 ANKRD13A CPE AMOT LGALS3 GOLGA4 DPP10 CALR ATP6AP1 RAPGEF4 PDE4D PTK2B CDKN1A ARRB1 GRIK2 AP3M1 SRC TBCCD1 DPY30 PRKCD ICE1
15	Up regulated in 3D biochip	0.00381569	12	Regulation of vesicle-mediated transport	RIMS2 RAB21 LGALS3 ATP6AP1 RAPGEF4 DNM1 RAB29 HAP1 CALR ANKRD13A ARRB1 SRC
16	Up regulated in 3D biochip	0.00452994	26	Establishment of protein localization	RAB21 RAB29 OS9 ARFIP1 VCP HAP1 GAPDH DNAJC1 GOLGA4 CALR BCAP31 ITGA8 RAPGEF4 SNX25 CDKN1A ARRB1 PAM RIMS2 AP3M1 SRC ARFGAP3 PCSK5 PHLDB2 PRKCD ICE1 ATP6AP1
17	Up regulated in 3D biochip	0.00452994	39	Regulation of biological quality	ATP6AP1 PCSK5 DNM1 CPE DAGLA CLSTN3 XKR6 WIPF2 GPHN RIMS2 KCNH7 SRC PDE4D OS9 GOLGA4 HEXB RAB21 RAPGEF4 COMT ACOT13 LEPR PTK2B SLC25A23 ARRB1 PAM HSD17B12 CEBPG SPPL3 PRKCD GRIK2 VCP GRIK1 HAP1 CALR TBCCD1 BCAP31 GAPDH PSMA3 CDKN1A
18	Up regulated in 3D biochip	0.0053051	39	Cellular protein modification process	DUSP12 WDR70 PTK2B PIGT TAOK3 SENP7 PELI2 RNF144A DPY30 PRKCD GPHN SRC LGALS3 CDK2AP1 CDKN1A ARRB1 UBXN1 VCP PHF8 ATP6AP1 RNF13 HERC1 PDE4D NPRL2 PAM DCAF16 GRIK2 HECTD4 MGAT4C NELFE CCNL2 SNX25 OS9 SPPL3 GAPDH CPE CHGB PSMA3 WDR20
19	Up regulated in 3D biochip	0.0053051	25	Peptide transport	RAB21 RAB29 OS9 ARFIP1 VCP HAP1 GAPDH DNAJC1 GOLGA4 CALR BCAP31 RAPGEF4 CPE SNX25 CDKN1A ARRB1 PAM RIMS2 AP3M1 SRC ARFGAP3 PCSK5 PRKCD ICE1 ATP6AP1
20	Up regulated in 3D biochip	0.0053051	25	Vesicle-mediated transport	DNM1 XKR6 WIPF2 RIMS2 BCAP31 ARFGAP3 RAB21 LGALS3 GOLGA4 ATP6AP1 RAPGEF4 LEPR RAB29 ARRB1 VCP HAP1 CALR AP3M1 SRC ANKRD13A DPY30 HEXB APOOL PRKCD HGSNAT
21	Up regulated in 3D biochip	0.0053051	16	Regulation of protein localization	ANKRD13A GAPDH LGALS3 DNAJC1 ARFIP1 DPP10 BCAP31 ARRB1 CLSTN3 PAM SRC RAB29 OS9 PRKCD ICE1 RAPGEF4
22	Up regulated in 3D biochip	0.0053051	23	Cellular protein localization	RAB21 RAB29 OS9 ARFIP1 VCP GPHN HAP1 BCAP31 ANKRD13A CPE AMOT LGALS3 GOLGA4 DPP10 CALR CDKN1A GRIK2 RIMS2 AP3M1 SRC PRKCD ICE1 ARFGAP3

## Sheet: GOKEGG
	Direction	adj.Pval	nGenes	Pathways	Genes
1	Down regulated in 3D biochip	0.000421384	5	Fluid shear stress and atherosclerosis	NFE2L2 ACTB BMP4 ACTG1 TNFRSF1A
2	Down regulated in 3D biochip	0.00247204	5	Thermogenesis	MT-CO1 MT-ND5 NDUFS8 ACTB ACTG1
3	Down regulated in 3D biochip	0.00255214	4	Apoptosis	DFFB ACTB ACTG1 TNFRSF1A
4	Down regulated in 3D biochip	0.00279285	4	Non-alcoholic fatty liver disease (NAFLD)	INS MT-CO1 NDUFS8 TNFRSF1A
5	Down regulated in 3D biochip	0.0082825	2	Terpenoid backbone biosynthesis	HMGCS1 IDI1
6	Up regulated in 3D biochip	0.0066858	6	Protein processing in endoplasmic reticulum	BCAP31 OS9 MBTPS2 DNAJC1 VCP CALR
7	Up regulated in 3D biochip	0.00780538	5	Lysosome	HGSNAT CTSE AP3M1 HEXB ATP6AP1

## Sheet: GOMLF
	Direction	adj.Pval	nGenes	Pathways	Genes
1	Down regulated in 3D biochip	0.00149148	2	Structural constituent of postsynaptic actin cytoskeleton	ACTB ACTG1
2	Down regulated in 3D biochip	0.003018	4	Structural constituent of cytoskeleton	ACTB ACTG1 VIM NEFM
3	Down regulated in 3D biochip	0.003018	3	Pre-mRNA binding	RBM22 HNRNPU SF1
4	Down regulated in 3D biochip	0.00554162	2	Profilin binding	ACTG1 DBN1
5	Up regulated in 3D biochip	0.000265169	29	Enzyme binding	PDE4D RNF144A PDE3B PSD3 RIMS2 SRGAP1 RAB29 UBXN1 PRKCD ATP6AP1 DUSP12 RAPGEF4 HERC1 DNM1 PTK2B OS9 ARRB1 PAM GRIK2 VCP SRC WDR70 PSMA3 CDK2AP1 CDKN1A LGALS3 GOLGA4 CALR AP3M1
6	Up regulated in 3D biochip	0.00232571	9	Ubiquitin protein ligase binding	UBXN1 PTK2B GRIK2 SRC PSMA3 CDKN1A ARRB1 VCP CALR
7	Up regulated in 3D biochip	0.00232571	6	Ion channel binding	PDE4D RIMS2 ARRB1 SRC DPP10 HAP1
8	Up regulated in 3D biochip	0.00394916	3	Ionotropic glutamate receptor activity	GRIK2 GRIK1 PTK2B
9	Up regulated in 3D biochip	0.00572208	25	Catalytic activity, acting on a protein	MBTPS2 PCSK5 RNF144A PRKCD SRC DUSP12 RNF13 PSMA3 CPE PTK2B PIGT TAOK3 SENP7 PELI2 PAM SPPL3 CTSE NPRL2 CDKN1A PHF8 HERC1 HECTD4 DPP10 MGAT4C GAPDH
10	Up regulated in 3D biochip	0.00573711	2	Kainate selective glutamate receptor activity	GRIK2 GRIK1
11	Up regulated in 3D biochip	0.00573711	3	CAMP binding	PDE10A PDE4D RAPGEF4
12	Up regulated in 3D biochip	0.00878107	3	3 ,5 -cyclic-nucleotide phosphodiesterase activity	PDE3B PDE10A PDE4D
13	Up regulated in 3D biochip	0.00878107	2	K48-linked polyubiquitin modification-dependent protein binding	UBXN1 VCP
