# Supplementary material for: Analysis of the transcriptome and metabolome of pancreatic spheroids derived from human induced pluripotent stem cells and matured in an organ-on-a-chip
Source: Royal Society of Chemistry journal article supplement (doi:10.1039/d2mo00132b), 2022-07-12
Supplement: d2mo00132b7.xlsx [file d2mo00132b7.xlsx]

## Sheet: identified compounds
Compound identified by GC-MS
hexanoic acid	L-asparagine
glycolic acid	putrescine
L-alanine	glycerol 1-phosphate
valine	O-phosphocolamine
acetohydroxamic acid	hypoxanthine
2-hydroxybutyric acid	citric acid
4-hydroxypyridine	alpha-D-glucosamine phosphate
benzyl alcohol	citrulline
L-leucine	4-aminobenzoic acid
2-ethylhexanoic acid	myristic acid
1-octanol	methyl-beta-D-galactopyranoside
2-ketoisocaproic acid	L-lysine
beta-hydroxyisovalerate	L-methionine sulfoxide
2-butyne-1,4-diol	9H-purine-6-amine /adenine
benzoic acid	fructose
caprylic acid	tagatose
ethanolamine	tyrosine
glycerol	pyridoxine
1-nonanol	gluconic acid lactone
L-threonine /L-allothreonine	D-allose /talose
DL-isoleucine	L-gulonic acid gamma-lactone
nicotinic acid	L-histidine
L-proline	galactosamine
glycine	D-sorbitol
succinic acid	Galactitol
picolonic acid	1-hexadecanol
glyceric acid	pantothenic acid
porphiryn	D-glucosaminic acid
nonanoic acid/1 decanol	galactonic acid
L-homoserine	xanthine
L-serine	palmitic acid
1-decanol/(nonanoic acid	N-acetyl-D-glucosamine
L-threonine	myo-inositol
nicotinamide	heptadecanoic acid
L-methionine	L-kynurenine
aspartic acid	linoleic acid
Beta-alanine	5-hydroxyindole-3-acetic acid
capric acid	L-tryptophan
L-cysteine	elaidic acid /oleic acid
trans-4-hydroxy-L-proline	trans-13-octadecenoic acid
D-malic acid	stearic acid
D-threitol	D-sphingosine
adipic acid	arachidic acid
L-pyroglutamic acid	serotonin
Phenylalanine	cellobiose
cinnamic acid	D-(+) trehalose /maltose
threonic acid	lactitol
L-glutamine	1-stearoyl-rac-glycerol / 1-monostearin
hexadecene	beta-gentiobiose
L-ornithine	isomaltose
L-glutamic acid	adenosine 3,5-cyclic monophosp
triethanolamine	L-(+) lactic acid
vanillin	urea
lauric acid	phosphoric acid
	D-glucose

## Sheet: day2-day16-3D-Petri
Compounds	FC (D16/D2)	P value
stearic acid	2.581	0.00093531
9H-purine-6-amine /adenine	2.8965	0.0021992
L-gulonic acid gamma-lactone	2.9614	0.0048412
5-hydroxyindole-3-acetic acid	0.13323	0.0053971
fructose	0.19304	0.0062939
L-methionine sulfoxide	0.45988	0.0094657
lactitol	0.28329	0.016782
adipic acid	0.43532	0.017391
2-hydroxybutyric acid	0.29364	0.021548
1-hexadecanol	3.3626	0.023196
hexadecene	2.0843	0.023696
L-alanine	0.047062	0.024926
acetohydroxamic acid	1.9196	0.029965
elaidic acid /oleic acid	2.7935	0.032258
glycine	1.6717	0.035486
L-glutamine	0.55111	0.040185
benzyl alcohol	2.6958	0.041979
L-tryptophan	1.5387	0.044402
1-decanol/(nonanoic acid	2.8905	0.045745
nicotinic acid	0.61	0.0479
isomaltose	1.8948	0.052151
palmitic acid	2.5193	0.052783
Phenylalanine	0.56274	0.054314
L-glutamic acid	1.7894	0.06572
galactonic acid	0.31201	0.069269
2-ketoisocaproic acid	0.51956	0.072184
O-phosphocolamine	2.0579	0.072752
tagatose	0.17604	0.073694
D-threitol	0.17874	0.075444
1-stearoyl-rac-glycerol / 1-monostearin	185.78	0.087346
caprylic acid	2.0382	0.091481
succinic acid	0.44326	0.092192

## Sheet: day2-day16-3D biochip
Compounds	FC (D16/D2)	P value
fructose	0.2268	0.0030201
L-cysteine	4.3019	0.0037913
9H-purine-6-amine /adenine	6.0589	0.0038572
D-glucosaminic acid	15.866	0.0066687
L-glutamic acid	3.7099	0.0091258
glycerol	2.8832	0.0094445
tyrosine	6.0644	0.011281
beta-hydroxyisovalerate	5	0.01357
L-lysine	4.0186	0.014553
glycine	3.4068	0.016479
glycerol 1-phosphate	4.7838	0.017137
elaidic acid /oleic acid	4.7766	0.018814
nicotinamide	2.8116	0.019582
O-phosphocolamine	19.632	0.02525
1-hexadecanol	3.1847	0.026732
4-hydroxypyridine	3.6729	0.027195
trans-13-octadecenoic acid	4.1889	0.028183
stearic acid	6.4067	0.028736
D-(+) trehalose /maltose	2.6242	0.029022
L-leucine	2.0944	0.033856
vanillin	2.285	0.03435
D-threitol	0.11671	0.034982
N-acetyl-D-glucosamine	2.4909	0.035707
porphiryn	2.7966	0.035757
D-allose /talose	4.6265	0.037585
acetohydroxamic acid	6.143	0.03854
D-malic acid	2.1756	0.039428
myristic acid	2.9072	0.039459
picolonic acid	1.8861	0.040135
ethanolamine	2.4379	0.041825
L-gulonic acid gamma-lactone	8.1343	0.042989
4-aminobenzoic acid	1.9772	0.044269
hexadecene	3.7163	0.05363
L-threonine /L-allothreonine	3.6358	0.057347
serotonin	2.5224	0.059059
L-ornithine	2.3885	0.060306
trans-4-hydroxy-L-proline	5.1883	0.060538
pyridoxine	2.2467	0.06204
L-tryptophan	2.2618	0.067157
L-kynurenine	2.7903	0.067183
L-glutamine	2.4387	0.068125
L-homoserine	2.3874	0.068306
adipic acid	0.56811	0.072425
palmitic acid	4.7359	0.072451
capric acid	2.5824	0.073649
valine	1.7849	0.073689
heptadecanoic acid	2.504	0.074061
L-asparagine	2.0115	0.078413
beta-gentiobiose	3.5242	0.079544
D-glucose	2.0645	0.084138
D-sorbitol	10.756	0.084327
Phenylalanine	2.0645	0.088702
tagatose	0.27919	0.089287
myo-inositol	2.0789	0.090629
2-ketoisocaproic acid	2.1557	0.091306
benzyl alcohol	0.37013	0.097091
arachidic acid	3.3918	0.097467

## Sheet: Biochip vs Petri - day 16
Compounds	FC (Biochip/Petri)	P value
5-hydroxyindole-3-acetic acid¬†	11.68	0.00030973
benzyl alcohol	0.1373	0.002343
threonic acid	0.28361	0.0061298
D-malic acid	3.5996	0.0063327
beta-hydroxyisovalerate	6.8231	0.0088079
D-glucosaminic acid	9.2443	0.0089834
L-cysteine	3.039	0.0093949
glycerol 1-phosphate	5.9425	0.012359
nicotinamide	3.2424	0.013315
serotonin	4.8496	0.014709
Phenylalanine	3.6686	0.017475
L-glutamine	4.425	0.018518
2-ketoisocaproic acid	4.1491	0.018562
tyrosine	4.0035	0.021793
glycerol	2.2826	0.022292
picolonic acid	2.1748	0.024104
2-ethylhexanoic acid	0.23558	0.029479
O-phosphocolamine	9.4695	0.033732
L-leucine	2.1285	0.035976
valine	2.109	0.036769
lactitol	2.5468	0.041004
glyceric acid	0.48124	0.051717
4-aminobenzoic acid	1.9215	0.05563
L-homoserine	2.5381	0.057138
L-lysine	2.3691	0.058382
9H-purine-6-amine /adenine	2.0918	0.058959
L-glutamic acid	2.0732	0.059036
ethanolamine	2.179	0.05956
porphiryn	2.3357	0.061344
N-acetyl-D-glucosamine	2.0307	0.063147
4-hydroxypyridine	2.4967	0.063465
D-allose /talose	3.1708	0.066428
galactosamine	0.51718	0.067709
cellobiose	2.9042	0.071194
L-kynurenine	2.6663	0.071854
glycine	2.0379	0.073309
L-ornithine	2.2155	0.074074
cinnamic acid	2.8001	0.076373
myo-inositol	2.2022	0.079298
D-sorbitol	12.539	0.07971
L-asparagine	2.022	0.079946
pyridoxine	2.1113	0.081348
D-(+) trehalose /maltose	1.9128	0.084098
acetohydroxamic acid	3.2002	0.084429
L-threonine	2.0413	0.085408
L-pyroglutamic acid	2.4655	0.086283
galactonic acid	2.6724	0.087049
L-alanine	8.0514	0.088457
gluconic acid lactone	4.1624	0.088551
lauric acid	0.49194	0.088707
D-glucose	2.0047	0.090241
urea	1.9212	0.096558
