# Supplementary material for: Analysis of the transcriptome and metabolome of pancreatic spheroids derived from human induced pluripotent stem cells and matured in an organ-on-a-chip
Source: Royal Society of Chemistry journal article supplement (doi:10.1039/d2mo00132b), 2022-07-12
Supplement: d2mo00132b8.xlsx [file d2mo00132b8.xlsx]

## Sheet: EL-2021-NC_LIMMS7_exp_table_gen
X	Stage1-Ipsc.1	Stage1-Ipsc.2	3D-Petri.1	3D-Petri.2	3D-Petri.3	3D-Petri.4	3D-Biochip.1	3D-Biochip.2	3D-Biochip.3	3D-Biochip.4	3D-Biochip.5	3D-Biochip.6
A1BG-AS1	0	0	0	1	0	0	0	0	1	1	0	0
A1BG;CTD-2619J13.8	0	0	1	0	1	0	3	2	1	2	0	2
A1CF	5	1	14	8	6	3	15	11	5	12	8	18
A2M	0	0	0	0	2	0	0	0	0	3	1	7
A3GALT2	0	0	0	0	0	0	0	1	1	0	1	0
A4GALT	0	0	2	0	1	1	1	1	0	1	1	2
AAAS	4	1	1	3	0	0	1	0	1	3	0	4
AACS	5	1	6	1	4	4	0	9	6	4	3	3
AADAC	0	0	0	0	0	0	0	2	0	0	1	0
AADACL2-AS1	0	0	0	0	0	0	0	0	0	0	0	1
AADACP1	0	0	0	0	0	0	1	0	0	1	0	0
AADAT	0	0	0	2	0	0	0	0	0	0	0	2
AAED1	1	0	0	5	2	0	0	1	2	4	2	0
AAGAB	8	2	3	4	9	26	11	10	10	7	8	22
AAK1	4	2	5	8	11	2	6	12	4	14	6	6
AAMDC	1	3	0	1	0	1	1	1	2	1	1	0
AAMP	12	15	14	14	14	33	12	20	11	24	16	13
AAR2	1	0	0	0	1	0	0	2	2	1	2	0
AAR2;AL121895.1	0	0	0	0	0	0	0	1	0	0	0	0
AARD	0	0	0	0	0	1	0	0	0	1	2	0
AARS	9	8	5	12	5	15	11	16	10	7	5	13
AARS2	2	1	0	0	1	0	3	1	0	1	1	1
AARSD1;PTGES3L-AARSD1	1	3	0	1	3	0	4	3	1	1	1	3
AASDH	0	1	0	1	1	6	2	1	2	1	0	0
AASDHPPT	4	2	2	6	2	2	1	2	2	6	2	2
AASS	1	1	0	0	3	0	2	1	0	0	0	0
AATF	26	9	10	16	31	20	15	26	14	22	10	19
AATF;RP11-333J10.3	0	0	0	0	1	0	0	0	0	0	0	0
AATK	0	0	0	0	0	15	1	2	0	2	0	0
AATK-AS1	0	0	0	1	0	0	2	3	0	0	0	0
AB015752.3	0	0	0	0	0	0	0	1	0	0	0	0
ABALON	0	0	0	0	0	0	0	0	0	1	1	0
ABAT	3	0	1	7	14	7	10	9	9	11	6	5
ABAT;RN7SL743P	0	0	0	0	0	0	0	1	0	0	0	0
ABBA01017803.1	0	0	0	3	0	1	1	2	0	0	0	1
ABCA1	0	3	0	2	1	0	1	2	1	3	2	3
ABCA10	0	1	0	0	1	0	1	3	1	1	1	1
ABCA10;PRO1804	0	0	0	1	0	0	1	0	0	0	0	0
ABCA11P	0	0	0	1	0	0	0	0	0	0	0	0
ABCA11P;ZNF721	4	3	4	1	5	10	2	6	1	3	2	4
ABCA12	0	0	0	0	0	0	0	0	0	1	0	0
ABCA2	0	0	0	0	0	0	3	6	2	0	1	1
ABCA3	1	1	1	0	1	0	10	5	2	4	6	1
ABCA4	1	0	0	0	0	0	0	0	0	0	0	0
ABCA5	2	2	7	4	2	2	11	15	4	10	9	6
ABCA6	0	0	0	0	0	0	0	1	0	0	0	0
ABCA7	0	1	0	4	1	0	1	1	5	3	1	2
ABCA8	0	0	0	1	0	0	0	0	0	0	0	0
ABCA9	0	0	0	0	0	0	1	1	0	0	0	0
ABCB1	0	0	0	1	8	6	1	1	1	4	2	1
ABCB10	1	0	0	2	0	0	2	3	1	2	0	2
ABCB11	0	0	0	0	0	0	0	0	0	1	0	0
ABCB4	0	0	0	3	1	0	0	0	0	0	0	4
ABCB6;ATG9A	0	0	0	1	0	2	4	6	2	0	1	1
ABCB7	2	1	2	4	1	0	2	5	2	4	0	6
ABCB8	1	1	1	1	1	0	1	1	0	2	1	0
ABCB9	0	0	0	0	2	0	4	1	1	1	0	3
ABCC1	8	2	2	3	2	0	2	2	4	2	2	8
ABCC10	2	0	0	5	3	9	5	4	0	2	2	1
ABCC11	0	0	0	0	0	0	0	0	0	0	0	0
ABCC2	1	0	0	0	0	1	1	2	1	1	0	0
ABCC3	0	0	0	0	0	0	0	1	0	0	0	0
ABCC4	3	0	2	2	4	0	0	2	0	1	0	0
ABCC5	13	3	1	8	4	11	17	14	9	13	8	11
ABCC6	0	0	0	0	1	0	1	2	2	1	3	1
ABCC6P1	0	0	0	0	0	0	0	0	0	0	1	0
ABCC6P2	0	0	0	0	0	0	0	0	0	0	0	0
ABCC8	20	4	15	32	30	46	47	59	37	34	20	36
ABCC8;SDHCP4	0	0	0	1	0	0	0	0	0	0	0	0
ABCC9	0	0	0	0	0	0	0	1	0	0	0	0
ABCD1	0	0	0	1	0	2	1	0	0	2	0	0
ABCD3	1	0	2	3	4	4	6	3	5	2	5	2
ABCD4	2	1	1	2	0	0	5	4	0	1	5	1
ABCD4;AC005519.4	0	1	0	0	0	0	0	0	0	2	0	0
ABCE1	3	1	2	2	1	1	4	2	2	2	0	2
ABCF1	41	13	17	38	36	72	45	69	19	48	30	64
ABCF2	13	0	2	1	5	0	4	2	2	2	2	6
ABCF2P1	0	0	0	0	0	0	1	0	0	0	0	0
ABCG1	2	0	0	0	2	3	3	3	3	1	1	1
ABCG2	1	0	1	0	2	0	3	0	0	1	0	0
ABHD10	7	3	7	4	7	22	6	8	9	7	3	21
ABHD11	0	1	0	4	3	0	1	1	2	6	1	0
ABHD12	4	3	2	3	4	6	4	4	2	5	1	1
ABHD13	6	2	4	3	2	4	2	3	4	1	4	11
ABHD14A-ACY1;ACY1	0	0	0	1	0	0	0	0	0	0	0	0
ABHD14A;ABHD14A-ACY1	2	0	0	0	2	0	1	0	1	1	1	1
ABHD14B	0	0	0	0	0	0	1	1	1	0	0	0
ABHD15	0	0	0	0	0	0	5	0	0	0	2	0
ABHD15-AS1	0	0	0	0	0	0	1	0	0	0	0	0
ABHD15-AS1;ANKRD13B	3	0	2	1	1	0	1	0	1	2	0	1
ABHD15-AS1;TP53I13	0	0	0	2	3	1	0	0	0	1	1	0
ABHD16A;XXbac-BPG32J3.20	3	1	5	7	6	0	6	9	3	5	4	1
ABHD17A	1	0	0	0	1	0	0	0	2	0	0	0
ABHD17AP1	1	0	0	0	0	0	0	0	0	0	0	0
ABHD17B	4	1	1	1	1	0	2	1	0	0	0	0
ABHD17C	0	0	0	0	1	0	0	0	1	2	0	0
ABHD2	2	1	4	10	4	3	10	14	7	9	5	10
ABHD3	3	0	1	3	6	14	7	6	2	10	1	1
ABHD4	1	0	0	2	2	0	2	3	1	0	0	2
ABHD5	1	1	0	2	0	0	2	4	1	1	1	4
ABHD6	1	0	1	3	0	0	0	2	0	1	0	4
ABHD8	0	0	0	0	0	0	0	0	0	1	0	0
ABI1	2	2	3	3	4	1	7	11	2	7	2	6
ABI2	7	2	0	7	6	8	11	8	5	4	0	1
ABL1	6	4	1	5	4	0	9	7	6	4	0	2
ABL2	3	1	0	2	6	0	1	4	7	6	0	2
ABLIM1	1	1	2	9	4	11	8	13	8	4	7	9
ABLIM2	3	1	2	3	5	3	1	1	3	5	0	5
ABLIM3	0	0	0	1	0	0	0	0	0	0	0	0
ABO	1	0	0	0	0	0	0	0	0	0	0	0
ABR	5	1	1	3	5	2	6	6	8	6	2	5
ABRACL	1	0	0	3	7	0	2	1	0	5	0	2
ABT1	2	0	0	0	1	1	1	2	1	2	0	2
ABTB1	0	0	0	0	1	0	0	0	1	0	1	0
ABTB2	5	0	0	2	3	2	1	5	2	4	3	1
AC000068.5	0	0	0	0	0	0	0	0	0	0	0	1
AC000095.9	0	0	0	0	0	0	0	0	0	0	1	0
AC000111.6	0	0	0	0	0	0	0	0	0	0	0	0
AC000403.4	0	0	1	0	0	0	0	0	0	0	0	0
AC002056.3	0	0	0	0	0	0	0	0	0	0	0	0
AC002064.5	0	0	0	0	0	0	1	0	0	0	0	0
AC002116.7	2	1	1	0	1	0	1	0	0	4	3	4
AC002116.8	0	0	0	1	0	0	0	3	1	0	1	0
AC002116.8;ALKBH6	2	0	0	3	0	0	1	3	0	2	3	0
AC002117.1	0	0	1	0	0	0	1	1	0	0	0	0
AC002310.11;ZNF747	0	0	0	0	0	0	0	1	0	0	0	0
AC002310.11;ZNF747;AC002310.13	0	0	0	0	1	0	0	1	1	0	0	0
AC002310.12	0	1	0	2	1	0	1	2	1	3	0	2
AC002310.13	0	0	1	1	1	0	0	0	0	0	2	0
AC002310.13;ZNF764	0	1	2	2	2	3	0	1	0	0	1	3
AC002310.14	0	0	1	0	0	0	0	0	0	0	0	0
AC002398.12	0	0	0	0	0	0	0	0	0	0	0	0
AC002398.13	0	0	0	0	0	0	0	0	0	0	0	0
AC002398.9;LIN37	0	0	0	0	0	1	1	0	0	0	0	0
AC002401.1	0	0	0	0	0	0	1	0	0	0	1	1
AC002451.3	0	0	1	0	0	0	0	0	0	0	0	0
AC002467.7	0	0	0	0	0	0	0	0	1	0	0	0
AC002480.3	0	1	0	0	1	0	0	0	0	0	0	3
AC002486.2	0	0	0	0	1	0	0	0	0	0	0	0
AC002539.1	0	0	0	0	0	0	0	0	0	0	0	0
AC002550.5	0	0	0	0	0	0	0	0	0	0	0	0
AC002985.3	0	1	0	0	0	0	0	0	0	0	0	0
AC003002.4	0	0	0	0	0	1	0	0	0	0	0	0
AC003002.4;ZNF548	0	0	0	0	0	0	0	1	0	0	0	0
AC003002.4;ZNF548;AC003002.6	1	1	0	0	1	10	1	2	1	1	1	2
AC003002.4;ZNF548;AC003002.6;AC004076.7	0	0	0	0	0	0	2	0	0	2	0	0
AC003002.6;AC004076.7	0	0	0	0	0	0	0	0	0	0	0	0
AC003002.6;AC004076.7;ZNF17	0	1	0	0	0	0	0	0	0	1	0	1
AC003005.4	0	0	0	0	0	0	0	1	0	0	0	0
AC003005.4;ZNF773	0	0	1	1	1	0	0	0	0	0	1	0
AC003006.7	0	0	0	1	0	0	0	0	1	1	1	0
AC003006.7;ZNF776	0	1	3	1	0	1	2	1	0	1	0	2
AC003075.4	0	0	0	0	0	0	0	0	0	0	0	0
AC003088.1	0	0	0	0	0	0	1	0	0	1	0	0
AC003090.1	0	0	0	0	0	0	0	0	0	0	0	0
AC003101.1	0	0	0	0	0	0	0	0	0	0	0	0
AC003682.16	0	0	0	0	0	2	0	0	0	0	0	0
AC004053.1	1	0	0	0	0	0	0	0	0	1	0	0
AC004053.1;AC004063.1	0	0	0	0	0	0	1	0	0	0	0	0
AC004057.1	0	1	0	0	0	0	0	0	0	0	0	0
AC004076.7	1	0	0	2	0	0	0	0	0	0	0	1
AC004076.7;ZNF749	0	0	0	0	1	0	0	0	1	0	1	1
AC004076.9	0	1	0	0	1	0	1	0	3	0	0	0
AC004076.9;VN1R1	0	0	0	0	0	0	0	1	0	0	0	0
AC004076.9;ZNF772	1	0	1	2	1	0	0	0	0	0	0	2
AC004156.3	0	0	0	1	0	0	0	0	0	0	0	0
AC004158.3	0	0	0	1	0	0	0	0	0	0	1	0
AC004237.1	1	0	0	0	0	0	0	0	0	0	0	0
AC004381.6	2	0	0	1	0	1	0	0	1	2	0	2
AC004386.4	0	0	0	0	0	0	0	0	0	0	0	0
AC004448.5;RPS2P46	2	0	0	0	0	0	1	0	0	0	0	0
AC004453.8	0	0	0	0	0	0	0	0	0	4	0	1
AC004471.9	0	0	0	0	0	0	0	0	0	0	0	1
AC004510.3	0	0	0	0	0	0	0	0	0	0	1	0
AC004538.3	0	0	0	0	0	0	1	0	0	0	0	0
AC004540.4	1	0	0	0	0	0	0	0	0	1	0	0
AC004540.5	1	0	0	0	0	0	2	0	1	0	0	0
AC004593.3	0	0	0	0	0	0	0	0	0	0	1	0
AC004692.4	0	0	0	0	0	0	0	1	0	0	1	0
AC004854.4	0	0	0	0	0	0	0	0	0	0	0	0
AC004862.6	0	0	0	0	0	0	0	0	0	0	0	0
AC004893.11	0	0	0	1	3	0	0	0	0	0	0	0
AC004895.4	0	0	0	0	0	0	0	0	0	0	1	0
AC004941.5	0	0	0	0	0	0	0	0	0	1	0	0
AC004947.2	0	0	0	1	0	0	1	0	0	0	0	0
AC004967.7	0	0	0	0	0	0	1	0	0	0	0	0
AC004980.7	3	1	2	2	1	2	5	12	1	2	1	0
AC005014.5	1	0	0	0	0	0	1	0	0	0	0	0
AC005027.3	1	0	0	1	0	0	0	0	0	0	0	0
AC005027.3;INHBA	3	4	3	3	3	8	2	1	3	1	1	3
AC005037.3	1	0	1	0	0	4	0	1	2	1	0	0
AC005062.2	0	0	0	2	1	0	2	1	2	0	0	0
AC005062.2;MACC1	1	0	0	0	1	0	2	0	1	1	0	0
AC005076.5	0	0	0	0	0	0	0	0	0	0	0	0
AC005077.14	0	0	0	0	0	0	0	0	0	0	0	0
AC005082.12	0	0	0	0	0	0	2	0	0	1	0	0
AC005083.1	0	0	0	0	0	0	0	0	0	0	1	0
AC005104.3	0	1	0	0	0	0	2	0	0	0	2	1
AC005154.6	3	1	0	5	1	12	8	4	3	3	2	18
AC005224.2	2	0	0	0	0	0	0	1	0	0	0	0
AC005229.7	3	1	0	1	4	4	2	2	2	2	3	2
AC005237.4	0	0	0	0	0	0	0	1	0	1	0	0
AC005251.3	0	0	0	0	1	0	1	0	0	0	0	0
AC005253.4	0	0	1	0	0	0	0	0	0	0	0	0
AC005255.3	0	1	1	1	2	2	4	1	1	3	1	0
AC005256.1	0	0	0	0	1	0	0	0	0	0	0	0
AC005281.1	0	1	0	0	0	0	0	1	0	0	0	0
AC005329.7	0	0	0	0	0	0	1	0	0	0	0	0
AC005355.2	0	0	0	0	1	0	0	0	0	0	0	0
AC005562.1	1	0	0	0	0	0	0	1	1	1	1	0
AC005562.1;LRRC37BP1	0	0	0	1	0	1	0	0	0	1	0	0
AC005562.1;SMURF2P1	0	0	0	0	0	0	0	0	0	0	0	0
AC005592.2	0	0	0	0	1	0	2	3	0	1	1	0
AC005606.14	0	0	0	0	0	0	0	0	0	0	0	0
AC005609.16	1	0	1	0	0	0	0	0	0	0	0	0
AC005614.5	2	0	0	0	0	2	2	0	1	0	0	0
AC005614.5;ZNF780A	0	1	0	2	0	0	0	5	3	0	0	5
AC005618.6	0	0	0	0	0	0	0	0	0	0	0	0
AC005740.5	0	1	0	0	0	0	1	0	0	0	0	0
AC005754.7	0	1	0	0	0	0	1	0	0	0	0	0
AC005775.2	1	0	0	1	0	0	0	2	3	0	0	0
AC005789.9	0	0	0	0	0	0	0	0	0	0	0	4
AC005795.1	0	0	2	2	1	0	1	2	2	3	1	0
AC005943.2	0	0	1	0	0	0	0	0	0	0	0	0
AC005943.2;UQCR11	1	0	0	3	2	0	3	1	0	4	1	1
AC006000.5	1	0	0	0	1	0	0	0	1	0	0	0
AC006116.17	0	0	0	0	0	0	0	0	0	0	0	0
AC006116.20	0	0	0	0	0	0	0	0	0	1	0	0
AC006128.2	1	0	0	0	0	0	0	0	0	0	0	0
AC006130.3	0	0	0	1	0	0	0	0	0	0	0	1
AC006160.5	1	0	0	0	0	0	0	0	0	0	1	1
AC006262.5	0	0	1	0	0	0	0	0	0	0	0	0
AC006272.2;AC006272.1	0	0	0	0	0	0	0	0	0	0	0	0
AC006369.2	0	1	0	0	2	0	4	5	0	3	1	0
AC006460.2	0	0	0	0	0	0	0	1	0	0	1	0
AC006486.9;ERF	0	0	1	6	3	1	2	0	0	1	0	5
AC006538.4	0	0	0	0	0	0	0	0	0	0	0	0
AC006538.4;AC006538.1	0	0	0	1	1	1	0	0	0	1	0	0
AC006538.4;SLC39A3	1	1	2	2	1	7	5	1	2	2	1	2
AC006547.14	0	0	0	0	0	1	0	0	0	0	0	0
AC006942.4	0	0	0	0	0	0	0	0	0	0	0	0
AC006994.2	0	0	1	0	0	0	0	0	0	0	0	0
AC007038.7	0	0	0	0	0	0	0	0	1	0	0	0
AC007040.11	0	0	1	0	0	0	0	0	0	0	0	1
AC007040.11;TEX261	3	0	0	0	1	3	1	1	2	2	0	4
AC007098.1	0	0	0	0	0	0	0	0	0	0	0	0
AC007128.1	0	0	0	0	0	0	0	0	0	0	0	0
AC007128.1;RP4-594A5.1	0	0	0	0	0	0	0	0	0	0	0	0
AC007193.10	0	0	0	0	0	0	0	0	0	0	0	0
AC007193.6	0	0	0	1	0	0	0	0	0	0	0	0
AC007193.9	0	0	0	0	0	0	0	1	0	0	0	0
AC007238.1	14	6	16	19	26	31	24	34	9	26	14	35
AC007246.3	3	0	2	1	5	0	9	6	5	5	2	1
AC007246.3;TMEM178A	0	0	0	1	0	0	0	0	0	0	0	0
AC007255.8	1	0	0	0	0	0	0	0	1	0	0	0
AC007277.3	0	0	0	0	0	0	0	0	0	0	0	0
AC007285.6	0	0	0	0	0	0	1	1	0	0	0	0
AC007292.4	0	0	0	0	1	0	0	0	0	0	0	0
AC007292.6	0	0	0	0	1	0	0	0	0	0	0	0
AC007318.5	1	2	4	4	1	2	7	10	4	4	0	8
AC007319.1	0	0	0	0	0	0	0	0	0	0	0	0
AC007383.3	0	0	0	1	1	0	0	2	0	1	0	0
AC007383.6	0	1	0	0	0	0	0	0	0	0	0	0
AC007392.3	0	0	0	0	1	0	0	0	0	0	0	0
AC007405.4	0	0	1	0	0	0	0	0	0	0	1	0
AC007563.1	0	0	0	0	0	0	0	0	0	0	1	0
AC007563.5	13	1	1	3	2	0	4	5	2	2	3	1
AC007563.5;AC007557.3	0	0	0	0	0	0	0	0	0	0	0	0
AC007563.5;AC007557.5	0	0	0	0	0	0	0	0	0	0	0	0
AC007563.5;AC007563.3	1	0	0	0	0	0	0	1	1	0	0	0
AC007566.10	2	0	0	0	2	0	0	1	0	0	2	1
AC007679.3	0	0	0	0	0	0	0	0	0	0	0	0
AC007682.1	0	0	0	1	0	0	0	0	0	0	0	0
AC007743.1	0	0	0	1	0	0	0	1	0	0	0	0
AC007796.1	0	0	0	0	0	0	0	0	0	1	0	0
AC007879.1	0	0	0	0	0	0	0	0	0	0	0	0
AC007879.5	0	0	0	0	0	0	0	0	0	1	0	0
AC007966.1	0	0	0	0	0	0	0	0	0	0	0	0
AC007969.4	1	0	0	0	0	0	0	0	0	0	0	0
AC007969.5	0	0	0	1	0	0	0	0	0	0	0	0
AC008063.2	0	0	0	0	0	0	0	1	1	0	0	0
AC008069.1	0	0	0	0	0	0	0	0	0	0	0	0
AC008073.9	0	0	0	0	0	0	0	0	1	0	0	0
AC008074.1	0	0	0	0	0	0	0	0	0	1	0	0
AC008074.3	0	0	0	0	0	0	1	0	0	1	0	0
AC008074.4	0	0	0	0	0	0	0	2	0	0	0	0
AC008277.1	0	0	0	0	0	1	0	0	0	0	0	0
AC008440.5	0	1	0	1	0	0	1	0	0	3	6	1
AC008753.6	0	0	0	0	0	0	0	0	0	1	0	0
AC008781.7	0	1	0	0	0	0	2	0	0	1	0	0
AC008937.2	0	1	0	0	0	0	0	0	0	0	0	0
AC009014.3	1	0	1	2	0	0	3	1	2	2	0	4
AC009052.12;POLR2C	9	1	1	8	9	11	2	11	4	10	3	17
AC009065.4	0	0	1	0	0	0	0	0	0	0	0	0
AC009120.4	3	0	0	0	1	1	0	0	0	0	0	0
AC009120.6	3	1	3	1	1	9	3	6	2	4	0	1
AC009120.6;AC009120.3	1	0	0	0	0	0	0	0	0	1	0	0
AC009133.22;QPRT	1	0	5	6	8	22	2	7	7	10	6	18
AC009133.24;PRRT2	0	0	0	0	1	0	0	1	0	0	0	1
AC009227.2	0	0	0	0	0	1	2	1	1	0	0	0
AC009262.2	0	0	0	0	0	0	1	0	0	0	0	0
AC009264.1	1	0	0	0	0	1	2	0	1	2	0	0
AC009299.2	0	0	0	0	0	0	2	0	0	0	0	0
AC009299.3	0	0	1	0	0	0	0	0	0	0	0	0
AC009299.5	1	2	0	0	0	0	1	6	0	1	0	0
AC009302.2	0	1	1	0	0	0	4	4	2	0	0	1
AC009303.1;AC009303.2	1	0	0	0	0	0	1	0	0	0	0	0
AC009403.2	0	1	1	0	0	3	2	3	1	2	0	1
AC009404.2	0	1	0	0	0	0	0	0	0	0	0	0
AC009410.1	0	0	0	0	0	0	1	0	0	0	0	0
AC009487.6	0	0	2	0	2	1	1	1	0	0	1	0
AC009495.2	0	0	0	0	0	0	0	0	1	0	0	0
AC009506.1	0	0	0	0	0	0	1	0	0	0	0	6
AC009784.3	0	0	0	0	1	0	1	0	0	0	0	0
AC009948.5	2	1	0	1	0	0	1	1	1	0	1	0
AC009961.3	0	0	0	0	0	0	2	0	3	0	0	0
AC010148.1	0	0	0	0	0	0	0	0	0	0	0	0
AC010240.3	0	0	0	0	0	0	0	0	1	0	0	0
AC010547.9;ZNF19	0	0	0	1	0	0	0	1	1	0	1	0
AC010642.1;ERVK3-1	8	2	2	8	10	5	5	7	10	8	7	21
AC010729.1	0	0	0	0	1	0	0	0	0	0	0	0
AC010761.6	0	0	0	0	0	0	0	0	1	0	0	0
AC010883.5	0	0	0	0	0	0	1	0	0	0	0	0
AC010884.1	0	0	0	0	0	0	0	1	0	0	0	0
AC010890.1	1	0	0	0	0	0	0	0	0	0	0	0
AC010967.2	0	0	0	0	1	0	0	0	0	0	0	0
AC010970.2	0	0	0	0	0	0	0	0	0	0	0	0
AC010976.2	0	0	0	0	1	0	0	0	0	0	0	0
AC010980.2	0	0	0	0	0	2	0	0	0	0	0	0
AC010987.6	0	0	0	0	0	0	0	0	0	0	0	0
AC011288.2	0	0	0	0	0	0	0	2	0	1	1	0
AC011290.4	0	0	0	0	0	0	0	0	0	0	0	0
AC011290.5	0	0	1	0	0	0	0	0	0	0	0	0
AC011513.3;CEACAM6	0	0	0	2	3	2	9	7	4	2	6	3
AC011513.4	0	1	1	0	1	0	1	0	1	1	2	2
AC011524.1	0	0	0	0	0	0	0	0	0	0	0	0
AC011530.4;DMWD	0	0	0	0	0	0	1	0	3	0	0	0
AC011747.3	0	0	1	0	0	0	0	0	0	0	0	0
AC011747.3;AC011747.4	0	0	1	0	0	0	0	0	0	0	0	0
AC011747.6	0	0	0	0	0	0	0	0	0	0	0	0
AC011933.2	0	0	0	0	0	0	0	0	0	1	0	0
AC011997.1	0	0	0	0	1	0	0	0	0	0	0	0
AC011997.1;MARS2	0	0	0	0	0	0	1	0	0	1	0	0
AC012065.1	3	0	0	1	0	1	0	1	0	2	1	0
AC012074.2	0	0	0	1	0	0	0	0	0	0	0	0
AC012146.7	0	1	0	0	0	0	0	0	0	0	0	0
AC012314.8	0	0	0	0	0	0	0	1	0	0	0	0
AC012354.8	0	0	0	0	0	0	1	0	0	0	0	1
AC012358.8	0	0	0	0	0	0	0	0	0	0	0	1
AC012363.4	0	0	0	0	0	0	1	0	0	0	0	0
AC012442.5	0	0	1	0	0	0	0	0	1	0	0	0
AC012442.5;AC012442.6	0	0	0	1	0	0	0	0	0	0	0	0
AC012445.1	0	0	0	1	0	0	0	0	0	0	0	0
AC012501.2	1	0	0	2	1	0	7	1	3	0	0	2
AC012501.2;RPRM	0	0	0	1	0	0	1	0	0	2	0	0
AC013275.2	0	0	0	0	0	0	0	0	0	1	0	0
AC013460.1	1	0	0	0	0	0	0	0	0	0	0	0
AC013463.2	0	0	0	0	1	0	0	3	0	2	1	0
AC013472.4	0	0	0	0	0	0	0	0	0	0	0	0
AC013733.3	0	0	0	0	0	0	0	0	0	0	0	2
AC015849.19	0	0	0	0	0	0	0	0	0	0	0	0
AC015849.2	1	0	0	0	0	0	0	0	0	0	0	0
AC015971.2	0	0	0	0	0	0	0	0	0	1	0	0
AC015987.1	0	1	0	0	0	0	0	0	0	1	2	0
AC016292.3	0	0	0	0	0	0	0	0	1	0	0	0
AC016582.2	0	0	0	0	0	0	0	0	0	1	0	0
AC016700.5	1	0	0	0	0	0	0	0	0	0	0	1
AC016716.1	0	0	1	1	1	0	0	0	0	0	1	1
AC016722.4	0	0	0	0	1	0	1	1	0	0	1	0
AC016723.4	0	0	0	0	0	0	0	0	0	0	0	0
AC016724.6	0	0	0	0	0	0	0	0	0	0	0	1
AC016730.1	0	0	1	0	0	0	0	0	0	0	0	0
AC016732.2	0	0	0	0	1	0	0	0	0	0	0	1
AC016738.4	0	0	0	0	0	0	0	0	0	0	0	0
AC016739.2	14	2	6	11	8	3	12	21	6	14	8	4
AC016747.3	0	0	0	1	0	0	0	0	0	0	1	0
AC016768.1	0	0	0	0	0	0	0	1	0	0	0	0
AC016831.7	0	0	0	1	0	0	0	3	0	0	0	0
AC016995.3	1	0	0	0	0	0	0	0	0	0	0	1
AC017074.2	0	0	0	0	0	0	0	0	0	0	0	0
AC017101.10	0	0	0	1	0	0	0	0	0	0	0	0
AC018359.1	8	2	3	6	2	6	5	12	10	3	4	2
AC018359.1;AC123023.1	2	1	2	2	2	0	3	0	2	7	0	0
AC018462.2	1	0	0	0	0	0	0	0	0	0	0	1
AC018647.3	0	0	0	1	0	0	0	0	0	0	0	0
AC018717.1	0	0	0	0	0	0	0	0	0	0	0	0
AC018755.16	0	0	0	0	0	2	0	0	0	0	0	0
AC018804.7	0	0	0	0	0	0	0	1	0	0	0	1
AC018816.3	0	0	0	0	0	0	0	0	0	0	1	0
AC018890.6	6	7	8	6	2	1	6	10	9	4	10	6
AC019117.1	0	0	0	0	0	1	0	0	0	0	0	0
AC019117.2	0	0	0	0	0	0	0	0	0	0	0	0
AC019171.1	0	0	0	1	0	0	0	0	0	0	0	0
AC019181.2	0	0	0	0	0	0	1	1	0	0	0	0
AC019186.1	0	0	0	0	2	0	0	0	0	0	0	0
AC022007.5	2	0	0	0	0	0	0	0	0	0	0	0
AC022154.7	0	0	1	0	0	0	0	0	0	1	0	0
AC022182.1	0	0	0	1	1	0	0	0	0	0	0	0
AC022182.2	0	0	0	1	0	0	0	0	0	0	1	0
AC023115.2	0	0	0	0	0	0	0	0	1	0	0	0
AC023590.1	0	0	0	0	0	0	0	2	0	0	0	0
AC024560.3	1	1	1	1	3	5	3	3	4	2	3	6
AC024592.12	1	0	0	0	0	0	0	1	0	0	0	0
AC024592.12;NDUFA11	0	2	0	5	4	0	1	1	1	2	3	3
AC024592.9	0	0	0	0	0	0	0	0	0	0	0	0
AC025171.1	0	0	0	0	0	0	0	0	0	0	0	0
AC026188.1	2	1	1	2	1	2	3	4	3	1	0	0
AC026202.3	1	0	0	0	0	0	0	0	0	1	0	2
AC026271.5	1	1	0	0	0	0	0	0	0	0	1	0
AC026803.1	0	0	0	0	0	0	1	1	1	0	1	1
AC027119.1	0	0	0	0	1	0	0	0	1	0	0	0
AC027612.6	0	0	0	0	0	0	0	0	0	0	1	0
AC034220.3	4	1	1	1	3	8	2	4	2	2	0	3
AC034243.1	0	0	0	1	0	0	1	0	0	0	0	0
AC037445.1	0	0	1	0	0	0	0	0	0	0	0	0
AC046143.3	0	0	0	0	1	0	0	0	0	0	0	0
AC053503.11	1	2	1	0	1	0	3	0	0	4	3	0
AC053503.11;RP11-316O14.1	0	0	0	0	0	0	0	0	0	0	1	0
AC058791.1	0	0	0	2	0	0	1	1	0	1	0	1
AC062017.1	0	0	0	2	0	0	0	0	1	0	1	0
AC062029.1	0	0	0	4	0	0	0	0	1	0	0	0
AC062031.1	0	0	0	0	0	0	0	0	0	0	1	0
AC067959.1;AC011752.1	0	0	0	0	0	0	0	0	0	0	0	1
AC067961.1	0	0	0	0	0	0	0	0	0	1	0	0
AC068134.6	0	0	0	0	0	0	0	0	0	0	0	4
AC068490.2	2	2	0	0	0	0	1	0	0	0	0	0
AC068533.7	0	0	0	0	0	0	1	0	0	0	0	1
AC068533.7;CRCP	8	3	6	9	10	17	7	9	12	12	8	19
AC068538.2	0	0	0	0	0	0	1	0	0	0	0	0
AC068831.3	2	0	0	1	0	0	0	0	0	1	0	0
AC069154.4	0	0	0	0	0	0	0	0	0	0	0	0
AC069155.1	0	0	0	0	0	0	0	0	0	0	0	0
AC069277.2	2	0	1	1	0	0	3	4	0	1	1	3
AC069368.3	1	0	0	0	0	0	1	0	0	0	0	0
AC069368.3;ANKDD1A	0	0	0	0	0	0	1	0	0	0	0	0
AC069513.4	0	0	0	0	0	0	0	0	0	0	0	4
AC072061.2;AC004987.9	1	0	0	0	0	1	1	0	0	1	0	0
AC072062.1	1	0	0	1	0	0	0	0	0	0	0	0
AC073046.25	1	0	0	0	0	0	0	0	1	0	0	0
AC073130.3;AC002066.1	0	0	1	0	0	0	0	1	0	0	0	1
AC073218.1	0	0	0	0	1	0	0	0	0	0	0	0
AC073283.4	0	0	0	0	0	0	0	2	0	0	0	0
AC073316.1	0	1	0	0	0	0	0	0	0	1	0	0
AC073342.12	0	1	0	0	0	0	1	1	0	0	1	0
AC073343.13	0	0	0	0	0	0	0	0	0	0	0	1
AC073464.4	0	0	0	0	0	0	1	0	0	0	0	0
AC073834.3	0	0	0	0	0	0	0	0	0	0	0	0
AC073842.19	0	0	0	0	0	0	1	0	0	0	0	0
AC073869.1	0	0	0	0	0	0	0	0	0	1	0	0
AC074011.2	1	0	0	0	0	0	0	1	0	0	0	0
AC074117.10	2	0	0	0	1	0	1	0	1	1	0	0
AC074212.6	0	1	0	0	0	0	0	0	0	0	0	0
AC074289.1	1	1	0	0	0	0	0	0	1	0	0	0
AC074363.1	6	7	3	17	15	9	10	4	8	9	2	13
AC078899.1	0	0	0	2	0	1	2	1	2	2	1	2
AC078941.1	1	0	0	0	0	0	0	0	0	1	0	0
AC078942.1	0	0	0	0	0	0	0	0	0	0	0	0
AC079117.1	0	0	0	0	0	0	0	0	0	1	0	0
AC079248.1	0	0	0	0	0	0	0	0	0	1	0	0
AC079610.1	0	0	0	0	0	0	1	0	0	0	0	1
AC079610.1;IKZF2	0	0	0	0	2	0	0	0	0	0	0	0
AC079610.2	0	0	0	0	0	0	0	0	0	0	0	0
AC079742.4	0	0	0	0	0	0	0	0	0	0	0	0
AC079807.2	0	0	0	0	0	0	1	0	0	0	0	0
AC079922.3	0	0	0	0	0	0	0	0	1	0	0	0
AC083843.1	0	0	0	0	0	0	0	0	0	0	0	0
AC083884.8	0	0	0	0	0	1	0	0	0	1	0	0
AC084082.3	0	0	0	0	0	1	0	0	0	0	0	0
AC084219.2	0	0	0	0	0	0	0	1	0	0	0	0
AC084219.2;ZNF223	0	1	0	1	1	3	2	0	0	0	0	0
AC084219.2;ZNF284	0	2	0	0	0	0	0	0	0	1	0	0
AC084219.4	0	0	0	0	0	0	0	0	0	0	0	1
AC087294.2	0	0	1	0	0	0	1	0	0	1	0	0
AC087499.5	0	0	1	0	0	1	0	0	0	0	0	0
AC090955.5	0	0	0	0	0	0	1	0	0	0	0	0
AC091132.1	0	0	0	0	0	0	0	0	0	1	0	0
AC091133.1	0	0	0	0	1	0	0	0	1	0	0	0
AC091153.4	0	0	0	0	0	0	0	0	0	0	0	0
AC091633.3	0	1	0	0	0	0	0	0	0	0	0	0
AC091729.9	1	0	0	0	0	0	0	0	0	0	0	0
AC091878.1	0	0	0	0	0	0	0	0	0	1	0	3
AC092171.2	0	0	0	1	0	0	0	0	0	0	0	0
AC092338.5	0	0	0	0	0	0	0	0	0	1	0	0
AC092415.1	0	0	0	0	0	0	0	1	0	1	1	0
AC092570.2	0	0	0	0	0	0	0	0	0	1	0	0
AC092620.2	0	0	0	0	0	0	0	2	0	0	0	0
AC092664.1	0	0	1	0	0	0	0	0	0	0	0	0
AC092675.3	4	0	1	2	1	16	1	1	0	0	0	1
AC092684.1	1	1	0	0	0	0	0	0	0	0	0	0
AC092755.4	0	0	0	0	0	0	0	0	0	0	1	0
AC092755.4;BNIP2	1	0	0	0	1	0	0	0	0	0	0	0
AC092835.2	0	3	1	0	0	0	0	0	0	0	1	2
AC092839.3	0	0	0	1	0	0	0	1	0	1	0	0
AC093106.5	0	0	0	0	0	0	0	0	0	0	1	0
AC093110.3	0	0	0	0	0	0	0	0	0	1	0	0
AC093323.3	1	0	0	0	0	0	1	0	0	0	0	0
AC093375.1	2	0	1	1	1	0	1	0	2	0	0	1
AC093382.1	0	0	0	1	0	0	0	0	0	0	0	0
AC093388.3	0	0	0	1	0	0	0	0	0	0	0	0
AC093495.4	0	0	0	0	0	0	1	0	0	0	0	0
AC093627.12	0	0	0	0	0	0	1	1	0	0	0	0
AC093627.9	0	0	0	1	2	0	0	0	0	0	0	0
AC093642.5	0	1	2	3	0	0	3	2	0	2	1	3
AC093724.2	0	0	0	0	0	1	0	1	0	0	1	0
AC093818.1	1	2	0	0	0	0	0	0	0	0	0	0
AC093838.4	0	0	1	0	1	0	1	0	1	0	1	0
AC093901.1	0	0	0	0	1	0	0	0	0	0	0	0
AC096558.1;RP11-570L15.2	0	0	0	0	0	0	0	0	0	0	0	0
AC096574.5	0	0	0	0	0	0	0	0	0	0	0	0
AC096669.2	1	0	0	0	0	4	1	1	1	0	2	0
AC096669.3	1	0	1	0	0	0	0	0	0	0	0	0
AC097467.2	1	0	0	0	0	1	0	0	0	0	0	0
AC097468.4	0	0	1	0	0	0	0	0	1	1	0	3
AC097468.7	2	0	1	3	1	1	2	4	1	8	3	1
AC097495.2	0	0	0	0	0	1	0	0	0	0	0	0
AC097499.1	0	0	0	1	0	0	0	1	0	0	0	0
AC097499.2	0	0	0	0	0	0	0	0	0	0	0	0
AC097662.2	1	0	0	0	0	0	0	0	1	0	0	1
AC097721.2	0	0	0	0	0	0	2	0	0	0	0	0
AC098614.2	1	0	0	2	6	6	5	2	3	2	4	3
AC098617.1	1	0	0	0	0	0	0	0	0	0	0	0
AC098795.1	0	0	0	0	0	0	0	0	0	1	0	0
AC098820.3	1	0	0	0	0	0	0	0	0	0	0	0
AC098973.2	0	0	0	0	0	0	0	1	0	0	0	0
AC099850.1	0	0	0	0	0	0	1	0	0	0	0	0
AC100830.3	0	0	0	0	0	0	0	1	2	3	1	1
AC104135.2	0	0	0	0	0	0	0	0	1	0	0	0
AC104532.2;VMAC	1	1	0	0	0	0	3	0	1	0	1	0
AC104534.2	1	0	0	0	0	0	1	0	0	1	0	0
AC104534.3;HNRNPL	0	0	0	0	0	0	2	1	1	0	0	0
AC104651.2	0	0	0	1	1	0	0	0	0	0	0	0
AC104777.2	0	0	0	0	0	0	0	0	0	0	1	0
AC104820.2	1	0	0	0	0	0	0	1	0	1	0	0
AC105342.1	0	0	0	0	0	1	0	0	0	0	0	0
AC105461.1	0	0	0	0	0	0	0	0	0	0	0	0
AC105760.2	0	0	0	0	0	0	0	0	0	1	0	0
AC106786.1	1	0	0	0	0	0	0	0	0	0	0	0
AC107081.5	0	0	0	1	0	0	0	0	0	0	1	1
AC107218.3	0	0	0	0	0	0	1	0	0	1	0	0
AC108004.2	0	0	0	0	0	0	0	0	0	1	0	0
AC108059.4	0	0	0	0	0	0	1	0	0	0	0	0
AC108142.1	0	0	1	0	0	0	0	0	2	0	0	0
AC108479.3	1	0	0	1	1	0	6	5	1	0	1	2
AC113189.5	0	0	0	0	0	0	0	0	0	1	0	0
AC113404.1	1	0	0	6	5	11	3	6	2	3	5	10
AC114271.2	0	1	0	0	0	0	1	1	0	0	0	2
AC114755.3	0	0	0	0	0	0	0	0	0	0	0	1
AC114803.3	0	0	1	0	0	0	0	0	0	1	1	0
AC115617.2	0	0	0	0	0	0	0	0	0	0	0	0
AC132807.1	0	0	0	0	0	0	0	0	0	0	0	0
AC133528.2	0	0	0	0	0	0	0	0	0	2	0	0
AC133680.1	0	0	0	0	0	0	0	1	0	0	0	0
AC135048.13;ORAI3	0	0	0	0	0	0	2	0	1	3	1	0
AC137695.1	0	0	1	0	0	0	0	0	0	0	0	0
AC137723.5	0	0	0	0	0	0	0	1	0	0	0	0
AC137932.4	0	0	1	0	0	0	0	0	0	0	0	0
AC138430.4	0	0	0	0	0	0	0	0	0	0	0	0
AC138430.4;HAPLN4	0	0	0	0	0	0	0	0	0	0	0	0
AC138430.4;TM6SF2	0	0	0	0	0	0	1	2	1	0	2	0
AC139143.2	0	0	1	0	0	0	0	0	0	0	0	0
AC139712.2	0	1	1	0	0	0	0	0	0	0	1	0
AC140481.8	1	1	0	0	0	0	0	0	1	0	0	2
AC141586.5	5	5	8	5	5	24	10	7	5	7	5	9
AC142472.6	0	0	0	0	0	0	0	0	0	0	0	0
AC142528.1	0	0	0	0	0	0	1	0	0	0	0	0
AC144449.1	0	1	0	2	1	0	2	2	4	0	1	4
AC144450.1	2	1	0	0	0	0	0	0	0	0	0	0
AC144652.1	2	0	0	0	0	0	0	0	0	0	0	6
AC145343.1	0	0	0	1	0	0	0	0	0	0	0	0
AC145343.2	0	0	0	0	0	0	0	0	0	0	0	0
AC147651.1	0	0	0	0	0	0	0	0	0	0	0	0
AC147651.4	0	0	0	0	0	0	0	0	0	0	0	1
AC226119.5	0	0	0	0	0	0	0	1	0	0	0	0
AC226119.5;FAM86EP	1	0	0	0	0	0	2	0	0	0	1	0
AC231657.1	0	0	0	0	0	0	0	0	0	0	0	0
AC245100.1	0	0	0	0	0	0	0	0	0	0	0	0
ACAA1	2	0	1	1	1	5	4	8	5	4	0	7
ACAA2	0	0	0	0	1	0	0	1	0	0	1	0
ACAA2;RP11-886H22.1	3	1	0	0	1	3	2	2	2	1	2	5
ACACA	9	6	2	6	10	26	12	6	15	14	4	9
ACACA;HMGB1P24	0	0	0	0	0	0	0	0	0	0	0	0
ACACA;RP11-19G24.1	0	0	0	0	0	0	0	0	1	0	0	0
ACACB	1	0	0	1	1	0	2	2	3	2	0	0
ACAD10	7	0	1	1	1	0	5	6	1	3	1	0
ACAD10;RP11-162P23.2	0	0	1	0	0	1	3	0	0	0	0	0
ACAD11;NPHP3-ACAD11	3	0	0	1	0	0	3	1	1	0	1	1
ACAD8	2	1	2	1	1	6	3	2	0	1	2	1
ACAD9	3	1	0	1	8	0	3	3	4	1	1	12
ACADL	0	0	0	0	0	0	0	0	0	0	0	0
ACADM	7	0	0	1	9	8	5	8	4	3	5	4
ACADM;RABGGTB	1	0	0	1	2	2	6	4	3	4	0	2
ACADS	0	0	1	0	0	0	3	3	0	1	2	0
ACADSB	2	0	1	2	0	0	1	6	1	4	0	5
ACADVL	17	2	8	11	6	33	19	13	8	11	8	4
ACAP2	7	2	3	1	10	8	10	10	4	5	4	7
ACAP3	3	3	5	10	2	10	5	4	7	8	4	9
ACAT1	2	0	0	2	0	1	2	1	1	6	0	2
ACAT2	3	1	9	20	31	34	18	24	15	34	11	15
ACBD3	9	4	4	4	7	5	11	4	7	12	3	4
ACBD4	2	0	2	0	0	0	0	2	1	0	1	1
ACBD5	4	0	1	2	4	9	3	4	4	1	3	1
ACBD6	11	1	3	13	9	25	18	20	7	12	9	20
ACBD7	1	0	1	0	1	0	0	1	1	0	1	0
ACCS	0	0	0	0	0	0	0	2	0	1	0	1
ACD	1	0	1	6	3	1	2	1	0	1	0	0
ACE	0	1	0	0	0	0	1	0	2	0	0	1
ACE;CTD-2501B8.1	0	0	0	1	0	0	2	0	0	0	0	0
ACE2	0	0	0	0	0	0	0	0	1	0	2	9
ACER2	0	0	0	0	0	0	1	1	0	3	0	0
ACER3	0	0	0	2	3	0	4	3	0	1	1	4
ACHE	0	0	0	1	2	0	0	0	0	0	1	0
ACIN1	74	15	18	37	56	77	50	62	39	37	28	58
ACKR2	0	0	0	0	0	0	1	0	0	0	0	0
ACKR2;RP11-141M3.6	0	0	0	0	0	0	0	0	1	0	0	0
ACKR2;RP11-141M3.6;RP11-136C24.3	0	0	0	0	0	0	0	0	0	0	0	0
ACKR2;RP11-141M3.6;RP11-136C24.3;KRBOX1	0	0	0	1	0	0	0	0	0	0	0	0
ACKR3	1	1	0	0	0	0	0	0	0	0	0	0
ACLY	17	10	13	23	31	34	26	27	21	24	16	21
ACMSD	0	0	0	0	0	0	0	0	0	0	0	0
ACO1	5	1	5	6	9	7	18	12	4	12	5	13
ACO2	3	1	1	2	4	8	5	4	4	2	0	0
ACOT11	0	0	0	1	1	3	0	4	0	0	2	0
ACOT12	0	0	0	0	0	0	0	1	0	0	0	0
ACOT13	5	0	5	8	7	1	17	24	8	18	6	12
ACOT2	0	0	0	0	0	0	0	0	0	0	1	0
ACOT7	1	0	1	1	2	3	1	8	6	4	0	7
ACOT8	1	1	3	2	3	0	1	1	1	3	1	0
ACOT9	0	0	1	0	2	0	1	4	2	0	0	0
ACOX1	5	2	1	7	9	8	7	6	7	6	3	5
ACOX2	0	0	0	0	0	4	1	0	0	0	0	0
ACOX3	4	3	1	0	2	1	4	1	2	6	2	4
ACOXL	0	0	0	0	1	0	0	0	0	0	0	0
ACP1	11	3	5	16	15	26	18	30	7	24	10	33
ACP2	4	0	0	2	1	0	0	1	2	3	2	7
ACP6	2	0	2	0	1	0	3	1	3	2	0	0
ACPP	0	0	0	1	0	0	0	0	0	0	0	1
ACRBP	0	0	0	0	0	0	1	1	0	0	0	0
ACSF2	0	0	0	0	0	0	1	0	0	0	0	0
ACSF3	0	0	2	0	3	6	1	0	2	1	2	0
ACSL1	9	2	2	4	9	1	3	5	6	5	6	4
ACSL3	2	0	3	3	4	4	6	11	8	4	4	0
ACSL4	2	1	2	3	4	5	3	4	3	0	5	5
ACSL5	0	0	0	0	0	0	3	0	1	1	0	3
ACSM1	0	0	0	0	1	0	0	0	0	0	0	0
ACSM3	11	7	1	1	1	1	1	2	0	0	0	1
ACSM6	0	0	0	0	0	0	0	0	0	0	0	0
ACSS1	0	0	0	0	0	0	0	0	0	0	0	0
ACSS2	2	0	2	1	4	0	0	1	0	0	0	0
ACSS3	2	2	0	2	2	4	0	0	0	2	0	4
ACTA1	0	0	0	0	0	5	0	0	0	3	0	0
ACTA2	0	0	0	0	0	0	0	0	0	0	0	0
ACTB	424	264	181	453	444	446	330	343	263	411	321	470
ACTB;AC006483.1	4	2	1	1	0	8	2	2	1	2	2	5
ACTBL2	0	0	0	0	0	0	0	0	0	0	0	0
ACTBP11	0	0	0	0	0	0	0	1	0	0	1	0
ACTBP2	6	2	2	3	6	4	6	4	1	3	7	5
ACTC1	2	0	0	2	2	0	0	1	0	0	0	1
ACTG1	118	32	53	255	258	235	104	104	70	276	148	247
ACTG1;AC139149.1	2	1	4	8	5	4	1	3	2	3	0	1
ACTG2	0	0	0	0	0	0	0	0	0	0	0	0
ACTL10	0	0	0	0	0	0	1	0	0	0	0	0
ACTL6A	7	5	4	1	0	1	3	2	2	1	2	5
ACTL6B	3	1	0	2	0	3	1	1	1	1	0	0
ACTN1	12	4	5	6	13	6	9	4	4	15	1	6
ACTN2	0	0	0	0	0	0	0	0	0	1	0	0
ACTN4	17	4	2	5	13	7	19	9	5	14	7	12
ACTN4P1	0	0	0	0	1	0	0	0	0	0	0	0
ACTR10	6	0	4	7	9	4	7	6	4	13	5	12
ACTR1A	1	0	2	5	0	3	5	9	4	7	1	2
ACTR1B	3	2	5	4	4	0	3	1	3	4	1	16
ACTR2	11	3	4	15	13	23	11	17	12	30	7	7
ACTR3	8	7	7	17	10	28	12	10	6	15	15	43
ACTR3B	2	1	0	0	0	2	3	3	1	1	0	0
ACTR3C	0	0	1	1	0	0	1	0	3	0	0	1
ACTR3P2	0	0	0	0	1	0	0	0	0	0	0	0
ACTR5	2	0	0	0	2	1	2	2	0	1	0	0
ACTR6	1	1	3	1	0	0	1	1	1	1	1	0
ACTR8	2	5	0	2	1	0	0	3	2	3	0	1
ACTRT3	0	0	0	0	0	0	0	0	2	1	0	0
ACVR1	2	2	0	5	1	13	1	3	1	4	1	1
ACVR1B	2	0	0	0	1	0	3	2	1	1	0	0
ACVR1C	4	1	12	13	12	3	24	25	11	18	12	7
ACVR2A	2	1	0	0	2	0	3	1	1	0	1	0
ACVR2B	1	3	1	3	2	1	1	0	1	2	0	0
ACYP1	0	0	1	0	2	5	0	0	0	1	1	1
ACYP2	9	1	7	3	0	1	5	14	10	2	3	11
ACYP2;HMGB1P31	0	0	0	0	0	0	1	0	0	0	0	0
AD000671.6;U2AF1L4	0	0	0	0	0	0	0	1	0	1	0	0
ADA	0	0	0	0	0	1	0	0	0	0	0	0
ADAL	0	0	0	2	0	0	0	0	1	1	0	0
ADAM10	10	2	5	2	10	21	13	14	7	10	8	8
ADAM10;HSP90AB4P	0	0	0	0	0	0	0	0	0	0	0	0
ADAM11	0	0	0	1	2	1	0	0	0	0	0	0
ADAM12	3	1	2	1	1	0	6	0	4	1	3	0
ADAM15	0	0	0	1	0	0	3	1	1	1	0	0
ADAM17	2	2	0	2	7	0	2	7	6	6	4	10
ADAM18	0	0	0	0	0	0	0	0	0	0	0	0
ADAM19	3	1	1	0	4	0	0	1	0	0	1	4
ADAM2	0	0	0	0	0	0	0	0	0	0	0	0
ADAM22	3	1	0	3	1	0	3	1	0	0	0	0
ADAM23	1	0	0	0	1	0	1	0	0	0	1	0
ADAM28	0	0	0	0	0	0	0	0	0	1	0	0
ADAM29	0	0	0	0	0	0	1	0	0	0	0	0
ADAM32	1	0	0	0	1	0	1	0	0	0	0	0
ADAM8	0	0	0	2	0	0	0	0	0	0	0	1
ADAM9	5	2	5	7	8	21	10	4	1	8	3	13
ADAMTS1	2	1	0	0	1	0	0	1	0	0	0	0
ADAMTS10	1	0	0	0	0	0	0	0	0	0	0	0
ADAMTS12	0	0	0	1	0	0	0	2	0	0	0	0
ADAMTS13	1	0	0	1	1	1	2	5	1	0	1	0
ADAMTS16	0	0	0	0	0	0	0	0	0	2	0	0
ADAMTS17	1	0	0	1	0	0	2	0	1	1	0	0
ADAMTS18	0	0	2	0	0	0	0	0	1	0	0	0
ADAMTS19	1	1	1	1	1	0	0	0	0	4	2	0
ADAMTS19-AS1	0	0	0	0	0	0	0	0	0	0	0	0
ADAMTS2	1	0	0	2	0	0	3	3	0	0	0	1
ADAMTS20	0	0	0	0	0	0	0	0	0	0	0	0
ADAMTS5	4	0	2	3	4	5	1	1	2	2	0	0
ADAMTS6	0	1	2	2	0	0	4	1	2	1	1	1
ADAMTS7	1	1	0	0	0	0	0	0	0	0	0	0
ADAMTS8	0	0	0	0	0	0	0	0	0	0	0	0
ADAMTS9	2	2	2	5	7	8	5	5	7	3	4	6
ADAMTS9-AS2	0	1	0	2	0	17	0	0	0	2	0	0
ADAMTSL1	1	0	0	2	0	0	2	2	2	2	0	1
ADAMTSL2	0	0	0	0	0	0	0	0	0	0	0	0
ADAMTSL3	0	0	0	0	0	2	0	1	2	0	0	0
ADAMTSL4-AS1	0	0	0	1	0	0	0	0	0	0	0	0
ADAMTSL5	0	0	0	0	0	0	0	0	0	0	0	0
ADAP1	0	0	0	0	0	0	0	0	0	0	0	0
ADAP1;COX19	0	0	0	1	0	0	0	0	0	0	0	0
ADAP2	2	0	1	3	1	1	1	3	0	1	0	0
ADAR	20	7	5	13	9	7	19	19	9	23	8	15
ADARB1	3	3	0	2	2	1	3	2	3	2	1	0
ADARB2	12	8	12	21	13	28	48	67	40	16	11	21
ADARB2-AS1	0	0	0	0	0	0	0	2	0	0	0	0
ADARB2;RP11-29A19.2	0	0	0	0	0	0	0	1	0	0	0	0
ADAT1	3	1	0	2	2	0	2	0	0	1	0	0
ADAT2	1	0	0	0	0	0	0	2	0	0	0	0
ADCK1	9	2	4	6	7	1	6	7	4	4	2	10
ADCK2	1	0	0	0	0	1	1	0	0	0	0	0
ADCK2;NDUFB2	0	0	0	0	0	0	0	0	0	0	0	0
ADCK3	2	0	1	0	1	1	2	2	2	1	0	0
ADCK4	1	1	1	0	0	2	0	2	0	1	0	4
ADCK5	1	0	0	0	0	0	0	0	1	1	0	0
ADCY1	16	4	4	8	7	9	13	12	4	8	2	9
ADCY10	1	0	0	0	0	0	1	1	1	0	0	1
ADCY10P1	1	0	2	0	1	0	0	0	0	0	0	0
ADCY2	14	5	11	22	23	28	34	43	26	36	11	20
ADCY3	1	0	0	2	2	0	0	0	0	0	0	0
ADCY5	2	2	2	2	0	0	0	1	0	2	0	0
ADCY6	0	1	1	0	2	0	0	5	3	2	0	0
ADCY7	0	0	0	0	0	0	0	0	1	0	0	2
ADCY8	0	0	0	0	1	0	0	0	0	0	0	1
ADCY9	10	1	2	2	1	2	1	4	3	4	1	1
ADCYAP1R1	0	0	0	0	0	0	0	0	0	0	0	0
ADD1	18	4	14	12	14	58	21	15	22	20	13	35
ADD3	3	2	2	4	4	1	3	1	1	2	2	1
ADD3-AS1	0	0	0	0	0	0	0	0	0	0	1	0
ADGRA1	3	2	1	3	1	3	1	0	2	5	0	2
ADGRA1-AS1	0	0	0	0	0	0	0	0	0	0	0	1
ADGRA2	1	0	0	1	0	0	0	0	0	0	0	0
ADGRA3	6	3	1	0	1	0	5	5	1	0	0	0
ADGRB1	1	0	0	0	2	0	0	0	0	4	0	0
ADGRB2	2	0	0	0	1	0	0	4	1	2	0	2
ADGRB3	0	0	1	0	0	0	0	0	1	1	0	2
ADGRD1	3	1	0	3	2	0	0	0	2	1	0	2
ADGRE2	0	0	0	1	0	0	0	0	0	0	0	0
ADGRE3;ITGB1P1	0	1	0	1	1	0	3	1	0	1	0	1
ADGRE5	0	0	0	0	0	0	0	0	0	0	0	0
ADGRF1	0	0	0	0	0	0	0	0	0	0	0	2
ADGRF2	0	0	0	0	0	0	0	0	0	0	0	0
ADGRF2;ADGRF4	0	0	0	1	0	0	0	0	0	0	0	0
ADGRF3	1	0	0	2	0	0	0	0	0	0	0	1
ADGRF4	0	0	0	0	0	0	0	0	0	0	0	0
ADGRG1	1	1	1	3	1	1	1	1	0	0	3	1
ADGRG2	0	0	0	1	0	0	0	1	1	5	0	0
ADGRG4	0	0	0	2	2	0	2	3	1	1	2	0
ADGRG5	0	0	0	2	0	0	0	0	0	2	0	0
ADGRG6	1	1	0	4	2	0	6	3	3	4	0	0
ADGRG7	0	0	0	0	0	0	0	0	0	0	1	0
ADGRL1	1	1	0	1	3	2	3	5	5	5	1	7
ADGRL2	4	0	1	3	3	0	2	6	0	2	0	3
ADGRL2;RP5-837I24.1	1	0	0	0	0	0	0	0	0	0	0	0
ADGRL3	9	1	3	0	0	8	2	4	1	0	1	0
ADGRV1	10	3	2	2	6	11	5	14	6	3	2	7
ADH1A	0	0	0	0	0	0	1	0	0	0	0	0
ADH5	8	0	3	3	3	0	5	1	2	3	4	0
ADH5P4	0	0	0	0	1	0	1	0	0	1	2	0
ADH6	0	0	1	2	0	0	0	5	0	2	1	3
ADHFE1	1	1	0	1	1	0	1	16	4	0	2	4
ADHFE1;C8orf46	0	0	0	0	0	0	0	0	0	1	1	0
ADI1	0	0	2	3	5	1	3	1	4	6	2	7
ADIPOR1	29	5	18	28	20	48	34	56	38	45	32	25
ADIPOR2	3	0	2	4	1	1	3	4	0	6	1	0
ADK	7	0	4	6	4	6	7	11	5	10	2	2
ADM	0	0	0	0	0	0	1	0	0	0	0	0
ADNP	4	3	4	1	1	5	3	1	3	7	1	3
ADNP-AS1	0	0	0	0	0	0	0	0	0	0	0	0
ADNP2	0	0	1	0	0	0	0	3	1	0	1	2
ADO	1	0	0	0	2	0	0	1	0	0	0	0
ADORA2A-AS1	0	0	0	1	0	0	0	0	1	2	0	0
ADORA2B	0	0	0	0	0	0	0	0	0	0	0	0
ADPGK	2	1	0	2	4	0	4	4	4	2	0	7
ADPGK-AS1	0	0	0	0	0	0	0	0	0	0	0	0
ADPRH	0	0	0	0	1	0	0	0	0	0	0	0
ADPRHL1	0	0	0	0	0	0	0	1	0	0	0	0
ADPRHL2	1	0	0	0	0	0	0	2	0	0	3	0
ADPRM	0	0	0	0	0	0	0	0	0	0	0	0
ADRA1A	1	0	0	0	0	0	0	1	0	0	0	0
ADRA1B	0	0	0	0	0	0	0	0	0	0	0	0
ADRA2A	0	1	0	1	0	0	0	0	0	0	0	0
ADRB1	0	0	0	1	0	0	0	0	0	0	0	0
ADRBK1	0	0	1	3	0	1	0	2	2	2	1	0
ADRBK2	5	0	4	1	3	0	4	15	8	5	2	1
ADRBK2;YES1P1	0	0	0	0	0	0	0	1	0	0	0	0
ADRM1	5	3	5	8	10	6	3	3	6	4	6	6
ADSL	0	0	0	5	2	8	0	7	6	4	6	11
ADSL;RP5-1042K10.14	0	0	0	0	0	0	0	0	1	0	0	0
ADSS	4	0	1	0	2	0	4	2	2	1	1	3
ADSSL1	0	0	0	0	0	0	0	0	0	0	1	0
AEBP1	1	0	1	0	1	0	0	1	1	0	0	0
AEBP2	2	0	2	0	0	1	4	6	1	5	4	3
AEBP2;PDCD5P1	0	0	0	1	0	1	0	0	0	0	0	0
AEN	0	0	1	0	1	0	0	0	3	4	3	6
AES	4	1	1	6	3	5	5	9	1	3	1	10
AF001548.5	0	0	1	0	0	0	0	0	0	0	0	0
AF013593.1	0	0	0	0	0	1	0	0	0	0	0	0
AF038458.3	0	0	0	0	1	0	0	0	1	0	0	0
AF038458.4	0	0	0	0	1	0	0	0	0	0	0	0
AF064858.8	0	0	0	0	0	0	0	0	0	0	0	2
AF064860.5	0	0	0	0	0	0	0	0	1	0	0	0
AF127936.9	0	0	0	0	0	0	0	1	0	0	0	0
AF127936.9;AF127936.7	4	1	1	0	0	0	1	0	1	0	1	3
AF127936.9;NRIP1	2	1	0	1	0	9	3	3	1	2	3	3
AF131216.1	0	0	0	0	1	0	0	0	0	0	0	0
AF131216.5	0	0	0	0	0	0	1	0	0	0	0	0
AF131217.1	0	0	0	0	0	0	0	1	0	0	0	0
AF146191.4	1	0	0	0	0	0	1	0	0	0	0	0
AF196779.12	0	0	0	0	0	0	0	0	0	0	0	0
AF196779.12;WDR45	0	0	0	2	0	7	0	0	0	1	0	0
AF196970.3	0	0	0	2	0	0	0	1	0	1	0	0
AF230666.2	0	0	0	0	0	0	0	0	0	1	0	0
AFAP1	6	2	4	4	5	0	2	2	2	6	2	13
AFAP1-AS1	0	0	0	0	0	0	0	0	0	0	0	0
AFAP1L1	0	0	0	0	1	0	0	1	0	0	0	0
AFAP1L2	0	0	0	1	0	0	0	0	1	2	0	0
AFF1	8	1	9	10	5	5	7	12	6	6	6	7
AFF2	0	0	0	0	0	0	0	0	1	0	0	0
AFF3	8	6	1	9	12	1	21	28	21	5	5	15
AFF4	8	0	2	10	16	31	29	17	10	9	6	15
AFG3L1P	2	1	2	0	3	3	2	1	4	2	3	8
AFG3L2	10	3	6	11	19	34	21	16	11	19	9	13
AFG3L2P1	0	1	0	0	1	0	1	0	0	0	0	1
AFM	0	0	0	0	1	0	1	0	0	0	0	0
AFMID	1	0	0	0	3	0	2	1	2	1	1	0
AFP	2	0	8	23	13	15	12	12	23	22	12	14
AFTPH	1	0	1	3	5	0	3	0	2	2	0	5
AGA	0	3	1	1	2	0	0	0	0	0	1	0
AGAP1	10	7	10	9	8	4	20	20	17	3	6	11
AGAP2-AS1	0	0	0	0	0	0	0	0	0	0	2	2
AGAP3	3	1	0	5	5	7	8	2	1	0	0	2
AGAP5;RP11-464F9.1	0	0	0	0	0	0	0	1	0	0	0	0
AGAP6	0	0	0	0	0	0	0	0	0	0	0	0
AGAP9;RP11-144G6.12	0	0	0	0	0	0	0	0	0	0	0	0
AGBL1	0	0	0	0	0	0	0	0	0	0	0	0
AGBL3	3	0	1	1	0	0	1	3	0	1	0	1
AGBL3;AC083862.6	0	0	0	0	0	0	0	0	1	0	0	0
AGBL4	10	7	5	10	8	4	23	33	25	11	5	15
AGBL4;AGBL4-IT1	0	0	0	1	0	0	1	2	1	1	1	2
AGBL4;BEND5	0	0	1	1	4	6	1	4	2	2	1	3
AGBL5	0	0	1	2	0	0	1	1	0	1	2	0
AGER	0	0	0	0	0	0	0	0	0	0	1	0
AGFG1	4	2	4	5	4	1	6	9	2	3	1	1
AGFG2	0	0	0	2	0	0	1	2	0	1	0	0
AGGF1	5	2	3	5	3	18	3	9	6	5	5	9
AGK	1	0	0	2	1	17	3	1	4	2	0	1
AGL	1	2	0	0	2	0	2	3	0	2	0	0
AGMAT	0	0	1	0	0	0	1	0	0	0	1	0
AGMO	0	0	0	0	0	0	0	0	0	0	0	0
AGO1	5	1	1	8	4	10	1	3	6	5	2	1
AGO1;RP4-789D17.3	0	0	2	0	0	0	0	1	1	0	0	0
AGO2	9	4	2	10	6	2	4	3	4	10	0	8
AGO3	4	1	1	6	5	3	11	7	4	3	2	18
AGO4	0	1	0	2	7	2	1	3	1	1	0	3
AGPAT1	2	0	0	3	2	29	2	1	4	3	1	1
AGPAT2	0	0	0	1	3	6	0	1	1	0	1	5
AGPAT3	2	0	1	2	2	0	6	5	4	5	5	1
AGPAT4	2	4	2	2	5	1	7	4	1	5	2	9
AGPAT4;AGPAT4-IT1	0	0	0	1	0	0	1	0	0	0	0	0
AGPAT5	0	1	2	6	4	0	10	15	4	8	2	15
AGPAT6	12	3	1	6	8	15	9	7	3	5	4	6
AGPAT9	0	0	0	0	0	0	0	0	1	1	0	0
AGPS	0	3	1	2	2	4	5	1	5	3	2	5
AGR2	0	0	0	0	4	0	2	0	1	0	2	1
AGR3	0	0	0	0	1	0	0	0	0	0	0	0
AGR3;RAD17P1	0	0	0	0	0	0	0	0	0	0	0	0
AGRN	6	3	0	4	0	0	5	3	1	1	4	1
AGRN;RP11-54O7.14	1	0	0	0	0	0	0	2	0	0	0	0
AGT	0	0	0	2	2	0	3	3	5	2	0	2
AGT;RP11-99J16__A.2	0	0	1	5	3	12	3	2	0	2	0	0
AGTPBP1	7	4	7	7	6	15	7	12	6	7	4	9
AGTR1	0	0	0	0	1	0	0	1	0	0	0	0
AGTRAP	3	0	0	0	0	1	0	0	0	2	0	0
AHCTF1	4	3	2	5	5	13	9	4	1	8	1	3
AHCY	4	1	3	1	2	1	4	4	1	3	2	1
AHCY;CTD-3216D2.5	0	0	1	1	0	0	0	0	0	0	0	0
AHCYL1	9	1	5	6	5	4	7	13	7	6	2	5
AHCYL2	1	0	4	2	5	3	10	14	2	2	2	0
AHDC1	9	1	1	10	15	5	7	16	9	8	6	5
AHI1	9	2	6	10	7	2	8	17	8	7	2	13
AHNAK	14	5	4	13	17	17	18	22	4	13	9	33
AHNAK2	0	0	0	0	1	0	0	5	2	0	1	4
AHR	3	1	0	2	2	0	4	1	3	1	1	1
AHRR	1	1	0	2	4	1	0	3	2	3	0	0
AHSA1	9	2	2	5	7	1	8	11	7	5	1	2
AHSA1;AF111168.2	0	0	0	0	0	0	0	0	0	0	0	0
AHSA2	1	0	1	0	0	0	3	7	1	0	0	0
AIDA	0	0	0	0	2	0	1	0	0	0	0	2
AIF1	1	0	0	1	1	0	1	0	0	0	1	0
AIF1L	3	0	0	2	0	0	0	0	0	0	0	0
AIFM1	4	0	3	4	6	0	9	8	4	6	5	9
AIFM2	0	1	0	1	4	0	1	0	2	1	2	3
AIG1	9	2	2	4	4	3	13	7	4	6	8	11
AIM1	2	0	0	0	0	0	1	0	0	0	0	1
AIM1L	0	0	0	0	0	0	1	0	0	0	1	0
AIM2	1	0	0	0	1	3	0	0	0	0	0	0
AIMP1	4	1	2	3	13	21	13	15	6	10	6	8
AIMP2	0	0	0	5	1	2	4	2	2	1	1	0
AIP	1	0	1	0	1	0	3	0	1	4	1	11
AJ003147.9	0	0	0	0	0	0	0	0	0	1	0	0
AJAP1	0	0	0	0	0	0	0	0	0	0	0	0
AJUBA	0	1	0	0	0	0	0	0	0	0	0	0
AK1	0	0	0	0	1	0	0	0	0	0	0	0
AK1;RP11-203J24.9	3	3	4	10	9	11	8	12	2	8	10	6
AK2	2	3	5	2	5	0	7	10	5	6	2	2
AK3	3	2	1	3	2	2	3	6	2	2	1	0
AK4	0	0	0	2	0	0	1	2	0	0	1	0
AK5	9	0	0	3	2	0	1	1	2	7	1	2
AK6	0	0	0	0	0	0	0	1	0	1	0	0
AK6;TAF9	5	3	4	22	12	5	12	23	7	29	12	28
AK6P1	1	0	0	3	0	0	1	1	1	1	2	0
AK7	1	0	0	0	0	1	2	5	1	1	0	3
AK8	1	0	0	0	1	0	1	0	0	0	0	5
AK9	5	1	2	6	2	26	7	6	7	5	3	13
AKAP1	1	1	2	5	8	1	0	4	5	4	3	6
AKAP10	1	2	0	1	1	0	2	1	0	3	2	3
AKAP11	5	3	4	6	6	17	2	11	2	6	3	3
AKAP12	10	4	3	22	27	47	7	7	1	15	1	15
AKAP13	13	4	3	6	11	12	14	29	10	6	7	13
AKAP13;CTD-2262B20.1	0	0	0	0	0	0	0	0	0	2	0	0
AKAP13;MIR7706	2	0	1	5	1	0	0	11	1	0	0	1
AKAP3	0	0	0	2	0	0	0	0	0	0	0	0
AKAP6	0	1	1	0	2	0	0	1	0	0	2	0
AKAP7	3	0	1	1	0	0	1	0	0	1	0	0
AKAP8	4	1	2	3	3	3	3	1	4	7	0	3
AKAP8L	22	3	5	17	7	10	18	25	20	18	10	20
AKAP9	21	11	6	31	51	27	46	61	26	41	20	40
AKIP1	4	0	1	1	2	4	4	4	4	2	0	2
AKIRIN1	6	2	0	7	3	16	6	9	5	5	2	7
AKIRIN2	0	0	0	2	2	0	1	0	1	1	0	1
AKNA	0	0	0	0	0	0	1	0	1	0	0	0
AKR1A1	6	2	4	8	8	7	10	11	1	9	6	4
AKR1B1	2	1	1	0	2	4	2	0	3	3	1	10
AKR1B10	0	0	0	2	0	0	0	0	0	0	0	0
AKR1B15	0	0	0	0	0	0	0	0	0	0	1	0
AKR1C1	0	0	0	0	0	0	0	0	0	2	1	0
AKR1C1;AKR1C3	0	0	0	0	0	0	1	1	0	0	0	1
AKR1C2	0	0	0	0	1	0	2	1	1	5	0	1
AKR1C4	0	0	0	0	0	0	0	0	0	0	0	0
AKR1D1	0	0	0	0	0	1	0	0	0	0	0	0
AKR1E2	0	0	0	0	2	0	0	0	0	0	0	1
AKR7A2	4	1	1	2	1	3	2	8	2	3	3	2
AKR7L	0	0	0	0	0	0	0	0	0	1	1	0
AKT1	8	0	6	4	4	1	3	4	5	4	4	1
AKT2	10	2	2	4	4	9	4	1	7	6	0	8
AKT3	9	5	1	7	17	16	9	15	6	14	8	1
AKT3;AKT3-IT1	0	0	0	0	0	0	0	2	0	0	0	0
AKT3;RP11-370K11.1	1	0	0	0	1	0	0	1	0	1	0	0
AKTIP	0	0	0	0	1	0	0	6	0	4	1	3
AL021546.6	0	0	0	0	0	0	0	0	0	1	0	0
AL021546.6;GATC	5	2	1	1	1	1	4	3	2	2	2	1
AL021807.1	0	0	1	0	1	0	0	0	0	0	0	0
AL031587.1	0	0	0	0	0	0	0	0	0	0	0	0
AL031777.1	0	0	0	0	0	0	0	0	0	0	0	0
AL035610.1	0	0	0	0	0	0	0	0	0	0	1	0
AL133168.3	0	0	0	0	0	1	0	0	0	0	0	0
AL133245.2	0	1	0	0	0	0	0	0	0	0	0	0
AL136419.6;MDP1;NEDD8-MDP1	1	0	1	0	0	0	0	0	1	2	1	1
AL157871.2	0	0	0	1	0	0	0	0	0	0	0	0
AL157871.2;SLC25A29	0	0	0	0	0	0	1	0	0	0	0	0
AL158801.1	1	1	2	0	0	0	1	1	1	1	2	1
AL163953.3	0	0	0	0	0	0	1	0	0	0	0	0
AL358852.1	0	0	0	0	0	0	1	0	0	0	0	0
AL365181.2	0	0	0	0	0	0	0	0	1	0	0	0
AL442127.1	0	0	0	0	0	0	2	0	0	1	0	0
AL450992.2	0	0	0	1	0	0	0	0	0	0	0	0
AL590762.11	0	0	0	2	0	0	0	1	0	0	0	0
AL590762.6	0	0	1	0	0	0	2	1	0	0	0	1
AL591893.1	0	0	1	0	0	0	0	0	0	0	1	0
ALAD	2	1	0	2	1	1	6	0	5	1	0	4
ALAS1	6	0	1	2	3	0	4	5	1	5	1	5
ALB	0	0	1	3	7	0	1	0	1	6	5	17
ALCAM	10	7	16	20	17	23	33	39	17	43	12	14
ALDH16A1	0	0	0	1	0	0	1	0	0	0	0	0
ALDH16A1;CTD-3148I10.9	0	0	0	1	0	0	1	0	0	0	0	0
ALDH18A1	5	2	3	5	2	0	6	8	3	3	5	12
ALDH1A1	11	3	10	22	34	59	34	35	19	41	29	72
ALDH1A2	0	0	0	1	0	0	0	0	0	0	0	0
ALDH1B1	4	0	2	1	4	3	1	2	1	0	1	0
ALDH1L2	0	0	0	0	0	0	0	1	0	1	0	0
ALDH2	2	0	0	0	0	4	0	0	2	2	0	0
ALDH3A2	1	1	0	1	3	0	10	5	3	1	1	4
ALDH3B1	0	0	0	0	0	0	0	0	0	0	0	0
ALDH3B2	0	0	0	0	0	0	0	0	0	0	0	0
ALDH5A1	2	2	0	1	1	0	1	1	0	0	0	0
ALDH6A1	3	0	1	1	5	0	0	1	2	2	0	8
ALDH7A1	7	7	2	4	5	5	10	7	6	10	2	3
ALDH9A1	3	1	4	4	4	12	1	7	1	3	3	11
ALDOA	11	2	14	22	17	13	28	29	17	27	17	15
ALDOB	0	0	0	0	1	0	0	0	1	0	1	2
ALG1	8	1	1	4	2	1	4	4	3	3	1	2
ALG10	0	0	0	0	0	0	0	0	1	0	0	3
ALG10B	0	0	0	0	0	0	1	0	0	0	0	0
ALG11	2	0	3	0	1	3	5	4	3	0	3	7
ALG11;UTP14C	0	0	0	1	1	0	2	0	1	0	1	0
ALG12	0	1	1	2	1	0	1	2	2	0	0	0
ALG13	6	2	1	6	5	14	6	4	3	4	1	4
ALG13-AS1	0	0	0	0	0	0	0	0	0	0	0	0
ALG14	0	0	0	1	1	0	1	2	5	0	0	1
ALG1L10P	0	0	1	0	0	0	0	0	0	0	0	0
ALG1L2	0	0	0	0	0	0	0	0	0	0	0	0
ALG1L2;RP11-77P16.4	0	0	0	0	0	0	0	0	0	0	0	1
ALG2	2	4	2	0	3	1	5	8	10	3	3	7
ALG3	3	1	0	5	14	2	2	5	1	10	5	11
ALG5	1	1	3	3	5	3	4	3	4	5	7	2
ALG6	0	1	0	1	0	0	0	0	1	1	1	5
ALG8	1	1	0	0	2	0	4	0	4	2	2	2
ALG9	1	0	0	0	0	0	0	0	0	0	0	0
ALG9;RP11-108O10.8	0	0	1	0	2	0	5	0	1	1	1	1
ALK	0	0	0	1	1	2	0	0	0	1	1	0
ALKBH1	1	2	0	0	6	3	2	5	2	1	1	2
ALKBH1;RPL21P10	0	0	0	0	0	0	1	0	0	0	0	0
ALKBH2	3	1	1	3	1	0	2	1	0	0	1	3
ALKBH3	2	2	0	1	0	1	2	1	1	1	3	1
ALKBH4	0	0	0	0	0	0	2	0	0	2	0	2
ALKBH5	5	2	3	11	8	6	13	9	2	5	4	8
ALKBH7	0	0	1	1	0	0	3	0	0	0	1	0
ALKBH8	2	0	0	0	2	0	1	0	0	1	0	0
ALMS1	2	0	3	3	3	4	7	7	6	5	1	4
ALMS1;ALMS1-IT1	0	0	0	0	0	0	0	0	0	0	0	2
ALMS1P	0	0	0	0	0	0	0	0	1	0	0	0
ALOX12	0	0	0	0	0	0	0	0	0	0	0	0
ALOX12-AS1	1	0	0	0	0	0	1	1	0	0	0	0
ALOX12-AS1;RP11-589P10.7	0	0	0	2	1	0	0	0	1	1	0	0
ALOX12B	0	0	0	0	0	0	0	0	0	1	0	1
ALOX12P2	0	0	0	0	0	0	0	0	0	0	0	0
ALOX15	0	0	0	1	0	0	0	0	0	0	0	0
ALOX5	0	0	0	1	0	2	0	0	0	3	0	2
ALPK1	0	0	0	0	0	0	0	0	0	0	0	0
ALPK2	0	0	0	0	0	0	0	0	0	0	0	5
ALPK3	5	2	0	4	10	2	3	4	1	5	1	0
ALPL	0	0	0	0	2	2	1	0	0	0	0	0
ALS2	4	1	1	3	6	9	7	11	3	6	4	14
ALS2CL	0	0	0	0	0	0	0	0	0	0	0	0
ALS2CR11	0	0	0	0	0	0	0	0	0	0	0	0
ALS2CR12	0	0	0	0	0	0	0	1	0	0	0	0
ALX1	0	0	1	0	0	0	0	0	0	0	0	0
ALYREF	0	0	0	0	1	0	0	1	1	0	0	0
AMACR;C1QTNF3-AMACR	3	1	0	2	6	0	1	5	2	5	5	10
AMBP	0	3	11	7	8	21	13	10	3	13	4	10
AMBRA1	6	4	5	1	1	4	2	5	4	4	1	5
AMBRA1;RP11-425L10.1	0	1	0	0	1	0	4	2	0	0	1	0
AMD1	1	0	2	3	3	4	3	1	1	5	0	4
AMDHD1	0	0	0	0	0	0	1	0	0	0	0	0
AMDHD2	0	0	0	1	0	0	0	0	0	0	0	0
AMELX	0	0	0	0	0	0	0	0	0	0	0	0
AMER1	2	0	0	0	5	0	2	3	0	2	1	0
AMER2	0	0	1	1	0	0	0	0	0	0	0	0
AMER3	8	3	4	11	10	2	6	3	6	7	3	16
AMFR	1	1	0	4	3	2	5	7	0	1	0	2
AMH	0	0	0	0	0	0	1	0	0	1	0	0
AMICA1	0	0	0	0	0	0	0	0	1	1	0	0
AMIGO1	0	0	0	2	0	0	1	2	0	1	0	1
AMIGO2	2	4	2	0	3	0	1	3	2	7	0	3
AMIGO3;GMPPB	0	0	0	0	0	0	0	0	0	0	0	0
AMMECR1	3	0	0	0	0	0	1	1	0	1	0	1
AMMECR1;GNG5P2	1	0	0	0	0	0	0	0	0	0	0	0
AMMECR1L	1	0	0	3	0	0	0	4	1	2	1	2
AMN	0	0	0	1	0	5	1	0	0	0	0	0
AMN1	1	1	0	2	4	10	1	5	1	3	0	0
AMOT	5	1	0	0	0	0	0	4	1	1	1	11
AMOTL1	5	0	2	3	4	0	8	1	5	2	2	7
AMOTL2	5	1	0	1	0	0	0	0	1	0	0	0
AMPD2	6	0	4	8	10	1	10	15	3	5	6	2
AMPD3	5	2	1	6	3	5	2	7	3	3	2	1
AMPH	2	2	2	8	2	5	1	3	4	1	1	0
AMT	0	0	1	1	1	2	0	2	2	0	0	0
AMY2B	0	1	0	0	0	0	0	0	0	2	0	0
AMY2B;ACTG1P4	0	0	0	0	0	1	0	0	0	0	0	0
AMZ1	0	0	0	0	0	0	0	1	0	0	0	0
AMZ2	7	2	4	4	10	18	13	20	5	12	8	8
AMZ2P1	1	0	0	3	0	0	0	1	2	0	0	1
ANAPC1	6	2	3	4	0	0	9	6	1	5	1	4
ANAPC10	4	1	2	4	4	0	4	5	4	5	2	3
ANAPC11	2	0	2	4	5	0	2	1	0	0	1	0
ANAPC13	1	2	1	6	3	1	4	5	7	12	6	8
ANAPC15	6	2	3	10	2	13	6	8	3	10	6	7
ANAPC16	2	6	4	5	9	2	6	12	7	10	5	9
ANAPC2	1	2	1	3	2	0	2	5	0	3	3	0
ANAPC4	0	0	0	0	2	2	0	4	1	0	1	2
ANAPC5	5	2	1	3	2	2	3	15	2	1	2	0
ANAPC7	0	0	0	1	1	2	1	0	1	0	2	0
ANAPC7;RP11-478C19.2	4	2	3	3	1	0	4	1	0	7	4	13
ANGEL1	5	0	0	4	1	0	5	5	4	2	3	6
ANGEL2	6	2	0	3	3	0	2	7	4	3	1	6
ANGPT1	0	0	0	0	0	0	0	0	0	0	0	0
ANGPT2	2	3	0	5	3	0	0	3	0	8	2	9
ANGPTL2	0	0	0	0	0	0	0	0	0	0	0	1
ANGPTL3	0	0	0	0	0	0	1	0	0	2	3	3
ANGPTL4	1	0	0	0	0	0	1	2	1	1	0	1
ANGPTL5	0	0	0	0	0	0	0	1	1	0	0	0
ANGPTL6	0	0	1	0	0	0	0	0	0	0	0	0
ANK1	7	2	2	3	3	0	11	13	10	4	4	5
ANK1;AC113133.1	0	0	0	0	0	0	0	2	0	0	0	0
ANK1;RP11-930P14.2	0	0	0	0	0	0	1	2	0	0	0	0
ANK2	2	0	3	13	14	14	15	30	21	24	6	6
ANK2;RP11-119H12.4	0	0	0	0	0	0	1	1	1	0	0	0
ANK3	0	2	0	2	0	3	5	8	7	2	1	2
ANKAR	1	0	1	0	1	0	0	2	0	0	0	2
ANKDD1A	0	0	0	0	0	0	0	0	1	0	1	0
ANKDD1B	0	2	0	0	0	0	0	0	0	0	0	0
ANKEF1	2	3	2	1	2	11	2	1	1	2	4	2
ANKFY1	8	2	1	2	3	10	3	3	4	4	0	2
ANKH	4	2	2	3	2	4	5	6	6	10	4	9
ANKH;RBBP4P1	0	0	0	2	0	1	0	0	2	0	0	1
ANKHD1	1	0	1	2	1	0	4	3	0	5	2	1
ANKHD1-EIF4EBP3	0	1	0	0	1	0	0	1	0	0	0	0
ANKHD1-EIF4EBP3;EIF4EBP3	0	0	0	0	0	0	0	0	0	1	0	0
ANKHD1;ANKHD1-EIF4EBP3	15	6	5	7	13	14	15	19	12	9	7	8
ANKIB1	1	2	0	5	8	3	2	7	4	5	0	0
ANKK1	0	0	0	0	0	0	0	0	0	0	0	0
ANKLE2	6	2	2	3	7	3	6	6	0	6	5	7
ANKMY1	2	0	0	1	2	0	2	3	2	1	0	0
ANKMY2	1	1	3	2	3	6	6	5	3	1	3	2
ANKRA2	1	2	0	0	0	0	0	3	0	1	2	0
ANKRD1	8	5	0	2	2	0	5	0	0	1	0	2
ANKRD10	4	1	1	4	2	4	2	4	6	2	1	0
ANKRD10;ANKRD10-IT1	1	0	2	0	0	0	0	0	1	0	0	0
ANKRD11	27	9	8	44	45	112	34	58	39	33	26	45
ANKRD11;RP1-168P16.1	0	0	0	0	0	0	0	0	1	0	0	0
ANKRD11;RP1-168P16.2	2	0	0	0	0	0	0	2	1	1	0	0
ANKRD12	7	2	1	14	15	8	8	8	5	23	12	7
ANKRD13A	1	1	0	0	0	0	2	2	4	2	1	2
ANKRD13C	7	1	1	8	5	8	3	4	6	9	1	7
ANKRD13D	1	0	0	0	2	0	0	2	0	0	1	0
ANKRD16	2	0	0	1	0	0	2	2	0	0	0	0
ANKRD17	16	7	7	10	24	32	30	43	17	23	8	29
ANKRD18A	0	0	0	0	1	0	2	0	0	0	0	0
ANKRD18CP	1	2	1	0	0	1	0	3	0	1	0	2
ANKRD19P	0	0	1	0	0	0	0	0	0	1	0	0
ANKRD20A11P	0	1	0	0	0	0	0	1	0	0	0	0
ANKRD23	0	0	0	0	0	0	0	1	0	2	0	0
ANKRD23;ANKRD39	1	0	1	0	2	0	1	3	1	1	0	0
ANKRD24	3	0	1	0	0	0	1	0	1	0	1	0
ANKRD26	5	1	3	6	2	6	8	9	4	3	4	0
ANKRD26P3;MRPL3P1	0	0	0	0	0	0	0	0	0	0	0	0
ANKRD27	4	1	0	3	3	12	3	3	0	5	2	5
ANKRD28	1	1	0	3	2	3	3	4	6	1	0	5
ANKRD29	0	0	0	0	0	0	0	0	0	0	0	0
ANKRD30BL	0	0	0	0	0	0	1	0	1	0	0	0
ANKRD31	0	3	0	0	0	0	0	0	0	0	0	0
ANKRD32	1	1	1	1	0	0	0	1	0	0	0	0
ANKRD33B	1	0	0	0	0	0	0	0	0	0	0	0
ANKRD34A	0	0	0	0	1	0	0	0	0	0	0	0
ANKRD35	0	0	0	0	0	0	1	0	0	0	0	0
ANKRD36	3	3	2	7	4	4	5	6	6	4	3	3
ANKRD36B	7	0	2	6	4	12	9	5	2	3	4	6
ANKRD36BP2	0	0	0	1	1	2	0	5	1	1	1	0
ANKRD36C	3	5	0	1	2	2	6	1	4	4	2	8
ANKRD36P1	0	0	0	0	0	0	0	0	0	0	0	0
ANKRD37	0	0	0	0	0	0	0	6	0	0	0	0
ANKRD39	11	3	10	5	13	7	18	20	7	13	10	12
ANKRD40	0	1	0	2	0	0	4	0	0	0	0	3
ANKRD42	2	1	2	1	0	0	0	2	0	1	0	0
ANKRD44	2	1	0	2	0	3	3	2	1	5	0	2
ANKRD44;ANKRD44-IT1	0	0	0	0	0	0	0	0	0	0	0	0
ANKRD45	0	0	0	0	0	0	0	0	0	0	0	0
ANKRD46	4	0	7	2	0	7	8	8	5	2	5	7
ANKRD46;GAPDHP62	0	0	0	0	0	0	0	0	0	0	0	0
ANKRD49	3	1	1	1	0	0	1	0	1	1	0	4
ANKRD50	3	0	1	1	0	0	1	1	2	0	2	0
ANKRD52	8	0	2	5	15	0	7	11	3	10	2	9
ANKRD53	0	0	0	1	0	0	1	0	0	1	2	0
ANKRD54	0	1	1	2	0	0	3	5	3	0	2	2
ANKRD54;MIR658	0	0	0	1	0	0	0	1	0	2	0	1
ANKRD6	1	0	1	0	5	0	1	1	2	1	0	2
ANKRD60	0	0	0	0	0	0	0	0	0	1	0	0
ANKRD65	0	0	0	2	0	0	0	0	0	1	0	0
ANKRD9	0	0	0	0	2	0	0	0	0	0	0	0
ANKS1A	1	0	4	3	3	0	6	22	3	1	5	9
ANKS1B	21	13	3	7	10	2	3	8	9	4	2	6
ANKS3	0	0	0	1	0	0	0	0	1	0	1	0
ANKS3;RP11-127I20.7	1	1	0	1	0	1	2	1	2	0	0	0
ANKS4B	2	0	3	7	9	33	4	8	5	4	6	7
ANKS6	2	1	0	1	1	1	0	4	1	3	0	0
ANKUB1	0	2	0	1	0	0	1	1	2	1	2	6
ANKUB1;PFN2	1	0	0	2	1	1	0	1	1	1	0	1
ANKZF1	8	0	2	0	3	0	4	14	2	4	1	0
ANLN	0	0	1	0	5	0	3	2	2	2	0	1
ANO10	4	0	2	3	3	2	4	8	5	0	1	1
ANO3	0	0	0	0	0	2	0	0	0	0	0	0
ANO4	0	0	0	0	0	0	0	0	0	1	0	0
ANO5	0	0	3	1	0	3	2	2	0	2	0	1
ANO6	2	2	1	5	7	1	6	5	3	6	2	2
ANO7P1	0	0	0	1	0	0	0	0	0	0	0	0
ANO8	0	0	0	1	0	3	0	1	0	1	0	0
ANO9	1	0	0	0	0	0	0	0	1	0	0	0
ANO9;RN7SL838P	0	0	0	0	0	0	0	1	0	0	0	0
ANOS1	0	1	1	1	0	0	0	1	0	0	2	0
ANOS2P	1	1	3	0	0	0	1	5	1	1	0	4
ANP32A	18	5	10	19	30	69	25	27	28	49	18	33
ANP32AP1	0	0	1	7	8	4	2	3	5	1	1	6
ANP32B	8	5	5	3	9	7	6	11	6	18	5	5
ANP32BP1	0	1	0	0	1	3	3	1	2	2	1	1
ANP32D	0	0	0	0	0	1	0	0	0	0	0	0
ANP32E	12	2	3	10	11	7	15	14	12	10	6	22
ANPEP	0	0	0	1	1	0	0	0	2	0	1	0
ANTXR1	3	0	1	0	1	0	0	0	0	0	0	4
ANTXR2	5	2	1	4	4	1	6	7	6	3	0	4
ANXA1	0	0	0	0	0	0	0	0	0	1	1	0
ANXA10	0	0	0	1	2	6	1	1	2	2	1	0
ANXA11	2	2	0	2	1	0	3	1	2	0	3	0
ANXA13	0	0	0	0	1	0	0	0	1	0	1	3
ANXA2	0	0	0	2	1	1	1	6	3	5	2	4
ANXA2P2	1	2	1	0	2	1	0	3	0	2	0	2
ANXA3	1	2	0	0	2	0	6	0	7	2	0	1
ANXA4	1	2	0	2	5	2	6	5	3	2	1	4
ANXA5	8	4	2	8	15	8	13	8	11	21	9	26
ANXA6	13	4	19	20	37	9	22	34	19	25	9	34
ANXA7	16	2	6	16	13	14	17	22	7	25	16	37
ANXA8L1	3	0	0	0	0	0	0	0	0	0	0	0
ANXA8L1;HNRNPA1P33	0	0	0	0	0	0	0	0	0	0	0	0
AOAH	1	0	0	0	0	0	0	0	0	0	1	0
AOC1	1	0	0	0	0	0	2	0	0	0	0	0
AOC2	0	0	0	1	0	0	0	0	0	0	0	0
AOC3	0	0	0	0	0	0	0	0	0	0	0	0
AOX1	0	0	0	1	4	0	0	0	0	0	0	0
AP000253.1	0	0	0	0	0	0	0	0	0	0	0	0
AP000266.7	0	0	0	0	0	0	0	0	0	0	0	0
AP000275.65;C21orf59	6	0	0	1	1	1	2	1	0	0	0	6
AP000295.9;IL10RB	1	0	0	0	0	4	0	0	2	2	1	1
AP000304.12	0	0	0	0	0	0	0	0	1	0	0	1
AP000304.12;ATP5O	17	11	12	15	15	53	12	21	7	17	9	40
AP000304.12;CRYZL1	4	1	0	3	1	0	6	9	3	3	6	0
AP000320.7	0	0	1	0	0	0	1	0	0	0	0	0
AP000320.7;AP000318.2	0	0	0	0	0	0	0	0	0	0	0	2
AP000350.10	0	0	0	0	0	1	0	1	0	0	0	1
AP000350.10;MIF	37	22	26	41	43	104	40	76	30	59	27	71
AP000350.5	1	0	0	0	1	0	0	1	0	0	0	1
AP000361.2	0	0	0	0	0	0	0	0	0	0	0	0
AP000432.1	0	0	0	0	0	0	1	0	0	0	0	1
AP000439.3	0	0	0	0	0	0	0	0	0	0	0	0
AP000442.1	0	0	0	0	0	0	0	0	0	1	0	1
AP000462.3	0	0	0	0	0	0	0	0	0	0	0	0
AP000476.1	0	0	0	0	1	1	0	0	0	0	0	0
AP000487.5	0	0	0	0	0	0	0	1	0	2	0	0
AP000487.6	0	0	1	1	0	0	0	0	0	0	1	0
AP000487.6;CTA-797E19.2	0	0	0	0	0	0	0	0	0	1	0	0
AP000563.2	0	0	0	0	0	0	0	0	0	0	0	0
AP000568.2	0	0	0	0	0	1	0	0	1	0	1	2
AP000654.5	0	0	0	0	0	0	0	0	0	0	0	0
AP000662.4	1	0	0	0	0	0	0	0	0	0	0	0
AP000692.10	1	0	0	0	0	0	1	0	0	0	0	0
AP000695.6;AP000695.4	0	0	0	0	0	0	0	0	1	0	0	0
AP000708.1	0	0	0	0	0	0	0	0	0	0	0	0
AP000721.4;OTUB1	9	3	9	1	5	12	10	3	3	5	6	8
AP000797.3	0	0	0	1	0	0	0	0	3	0	0	0
AP000892.6	0	0	0	0	0	0	0	0	0	0	0	0
AP001062.7	2	0	0	0	0	0	0	0	0	1	0	1
AP001062.8;C21orf2	0	0	0	0	0	0	0	0	0	0	0	3
AP001187.9	0	0	0	1	1	0	0	0	0	0	0	1
AP001187.9;MIR194-2	0	0	0	0	0	0	0	0	0	0	0	0
AP001258.4;AP001258.5	0	0	0	0	0	0	0	0	0	0	0	0
AP001347.6	2	1	0	2	0	0	1	1	5	1	0	0
AP001372.2	0	0	1	0	0	0	1	0	0	0	0	0
AP001372.2;POLD3	0	0	0	0	0	0	0	0	1	0	0	0
AP001432.14	0	0	0	0	0	0	0	0	0	0	0	0
AP001442.2	0	0	0	0	0	0	0	0	0	0	0	0
AP001468.58	0	1	0	0	0	0	0	0	0	0	0	0
AP001604.3	0	0	0	0	0	0	0	0	0	0	0	0
AP001626.2	0	0	0	0	0	0	1	0	0	0	0	0
AP001627.1	0	0	0	0	0	0	0	0	0	0	0	0
AP001628.6	0	0	0	0	1	0	0	0	0	0	0	0
AP002884.2	0	0	0	0	0	0	0	0	0	0	0	0
AP002884.2;BCO2	0	1	0	0	0	0	1	0	0	0	0	0
AP003041.1	1	0	0	0	0	0	1	1	1	0	0	0
AP003068.18	0	0	0	0	0	0	1	0	0	0	0	0
AP003068.23	1	0	0	1	0	0	0	0	0	0	0	0
AP003419.11	0	0	0	0	0	0	1	2	0	3	0	0
AP003419.11;CLCF1	0	0	0	0	0	0	0	0	0	1	0	0
AP003419.16	0	0	0	0	0	0	1	0	0	1	0	0
AP004782.1	0	0	0	0	0	0	0	0	0	2	0	0
AP006621.5	0	0	0	0	0	0	1	2	1	1	0	1
AP006621.8	0	0	0	0	0	1	0	1	0	0	0	0
AP006621.9	0	0	0	0	0	0	0	0	0	0	0	0
AP1AR	5	0	1	2	9	14	1	5	3	11	3	30
AP1B1	11	5	13	8	18	16	18	23	16	20	7	6
AP1B1P1	0	0	0	0	0	0	0	0	0	0	0	0
AP1G1	3	0	1	5	9	11	9	9	7	7	4	5
AP1G2	8	2	4	5	3	0	4	5	4	3	1	6
AP1M1	4	1	4	8	6	15	8	7	5	5	6	4
AP1M2	6	3	2	1	2	2	9	13	4	2	3	3
AP1S1	2	1	1	4	11	0	7	12	2	1	3	2
AP1S2	0	0	0	0	1	2	1	0	0	0	0	3
AP1S3	0	1	1	1	1	0	6	4	2	2	1	0
AP2A1	2	1	2	1	1	0	7	1	3	0	0	0
AP2A2	11	3	3	16	17	5	14	26	10	6	7	17
AP2B1	7	3	4	6	8	9	6	11	9	9	4	2
AP2B1;TAF15	0	1	0	4	2	0	2	1	2	5	0	0
AP2S1	2	0	1	3	1	0	5	0	1	3	8	8
AP3B1	3	5	3	11	4	11	8	15	4	4	0	14
AP3B1;CTD-2179L22.1	0	0	0	0	1	0	0	0	0	0	0	0
AP3B2	3	4	4	6	5	7	5	6	5	6	4	3
AP3D1	29	7	18	16	27	40	34	48	18	33	8	50
AP3M1	2	2	1	4	6	0	14	13	6	8	3	12
AP3M2	3	3	1	2	1	5	2	0	0	1	0	0
AP3S1	1	1	0	1	1	2	1	3	0	1	1	0
AP3S2	0	0	0	1	0	0	2	1	0	1	0	0
AP3S2;C15orf38-AP3S2	2	0	0	3	1	1	8	8	5	0	3	3
AP4B1	1	0	0	1	3	10	0	2	0	0	1	3
AP4E1	1	0	0	2	2	3	1	2	2	2	0	0
AP4M1	0	0	0	1	1	0	0	1	0	1	0	3
AP4S1	0	1	0	1	0	0	0	0	0	1	1	0
AP5B1	0	0	0	0	3	0	0	0	1	2	2	4
AP5M1	2	0	1	0	0	0	2	3	2	1	4	3
AP5S1	1	0	0	0	0	0	0	0	0	0	1	0
AP5Z1	1	0	2	5	2	1	2	3	4	3	1	5
APAF1	0	2	2	1	2	0	3	1	0	2	0	7
APBA1	1	0	0	0	0	0	0	1	0	1	3	0
APBA2	0	1	1	1	3	3	1	0	2	2	1	0
APBA3	0	0	1	1	2	1	1	0	0	0	1	0
APBB1	8	3	5	4	6	14	7	5	7	6	3	11
APBB1IP	0	0	0	0	0	0	0	0	0	0	0	0
APBB2	9	5	4	7	9	7	10	12	6	7	6	5
APBB3	0	0	0	1	0	3	1	2	1	1	0	0
APC	10	1	0	9	7	10	8	17	2	7	4	13
APC;CTC-554D6.1	0	1	2	1	1	0	2	3	3	4	5	4
APC2	2	0	0	0	0	0	1	2	0	1	1	1
APCDD1	0	1	0	0	0	0	0	0	0	1	0	0
APCDD1L-AS1	0	0	0	0	0	0	0	0	0	1	0	0
APEH	1	1	1	1	7	1	3	3	4	2	2	2
APELA	0	0	0	0	0	0	0	0	0	0	0	0
APEX1	12	7	6	8	6	23	11	5	6	13	4	17
APEX2	1	0	0	0	0	0	0	0	1	0	0	0
APH1A	3	0	1	1	1	11	2	3	4	3	2	1
APH1B	1	2	1	0	6	0	3	4	4	0	2	0
API5	13	5	4	7	18	17	20	23	9	18	8	23
API5P1	2	2	1	0	1	0	0	2	0	0	1	1
APIP	1	0	0	1	5	1	9	3	2	3	1	2
APITD1-CORT	0	0	0	0	0	1	0	0	0	0	0	0
APITD1-CORT;APITD1	0	2	0	2	3	0	3	7	6	2	2	4
APLF	5	3	0	0	0	0	6	0	1	1	0	0
APLP1	4	2	2	7	8	7	4	5	7	5	3	14
APLP2	33	14	12	25	37	50	67	72	40	46	25	95
APMAP	17	2	3	10	7	19	14	9	9	10	5	8
APOA1	1	2	2	6	3	11	3	7	5	4	5	9
APOA1BP	6	4	3	5	8	2	10	6	4	18	6	23
APOA2	1	0	3	3	7	2	4	1	3	3	3	7
APOA4	0	0	1	1	2	0	1	2	3	3	3	6
APOB	0	0	1	5	5	1	3	1	8	6	3	12
APOBEC2	0	0	0	0	0	0	0	1	0	0	0	0
APOBEC3A;APOBEC3B	0	0	0	0	0	2	0	0	0	0	0	0
APOBEC3C	0	0	0	1	0	0	0	0	0	0	0	0
APOBEC3C;APOBEC3D	0	0	0	0	0	0	0	0	0	0	0	0
APOBEC3D	0	0	0	1	0	0	1	0	0	0	0	0
APOBEC3F	0	0	0	0	0	0	0	0	0	0	0	2
APOBEC3F;APOBEC3G	1	0	0	0	0	0	0	1	0	0	0	0
APOBEC3G	0	0	0	0	0	0	1	0	0	0	0	0
APOBEC3H	0	0	0	0	0	0	0	0	0	0	0	0
APOBR	0	0	0	0	0	0	0	0	0	0	0	0
APOC1	0	1	0	0	0	0	0	0	0	0	0	0
APOC3	0	0	0	0	0	2	1	2	0	0	1	0
APOC4-APOC2	0	0	0	1	0	0	0	0	0	0	0	0
APOC4-APOC2;APOC2	0	0	0	0	0	0	0	0	0	0	0	0
APOD	0	0	0	0	0	0	0	0	0	2	0	0
APOE	2	0	1	4	2	0	2	1	3	3	0	2
APOL1	0	0	0	0	0	0	0	0	0	0	0	1
APOL2	1	2	1	3	1	0	0	2	1	2	0	2
APOL6	0	0	0	0	0	0	0	0	0	0	0	6
APOLD1	1	0	0	0	0	0	0	0	0	0	1	0
APOLD1;DDX47	5	0	0	0	0	13	2	1	3	4	1	1
APOM	0	0	0	0	4	0	0	0	0	0	1	0
APOO	1	1	1	0	1	10	1	3	0	10	0	0
APOOL	1	0	0	0	4	0	5	2	3	6	2	4
APP	51	18	32	41	31	50	52	69	48	64	18	80
APPBP2	1	1	2	3	6	3	2	1	2	0	0	5
APPL1	2	4	1	3	5	3	6	3	3	15	2	4
APPL2	9	2	3	4	8	3	7	6	6	6	8	12
APRT	1	0	0	4	3	2	3	2	3	2	0	4
APTR	0	0	0	2	0	0	3	0	2	0	1	0
APTX	5	2	3	5	3	1	6	10	4	2	3	2
APTX;LAGE3P1	0	0	0	0	0	0	0	0	0	0	0	0
APTX;TCEA1P4	0	0	0	0	1	0	0	0	0	0	0	0
AQP10	0	0	0	0	0	1	0	2	0	0	0	0
AQP11	0	0	0	0	1	0	0	0	0	0	0	0
AQP3	1	0	0	1	1	2	1	0	0	1	0	0
AQP4-AS1	0	0	0	2	0	1	0	1	4	5	1	0
AQP7	0	0	0	1	2	0	1	1	1	1	0	3
AQR	6	4	4	2	2	19	2	9	3	1	3	2
AR	0	0	0	0	1	1	0	1	0	0	0	0
ARAF	2	0	1	1	6	0	4	4	1	0	0	4
ARAP1	4	3	1	2	3	2	5	6	3	5	2	1
ARAP1-AS1	0	0	0	1	0	0	0	0	0	0	0	0
ARAP1;STARD10	12	3	3	15	12	21	8	13	8	15	5	3
ARAP2	1	0	0	0	1	0	2	1	0	2	0	8
ARAP3	0	0	1	0	0	0	0	0	0	0	0	0
ARC	1	0	0	2	1	0	0	0	0	0	0	0
ARCN1	16	6	9	8	19	25	27	34	21	29	10	20
AREG	0	0	0	3	0	5	9	5	2	2	2	2
AREL1	3	1	1	5	1	1	1	1	1	3	4	2
ARF1	24	11	25	33	40	34	37	47	23	32	29	28
ARF3	22	7	6	12	24	27	9	10	11	14	9	16
ARF4	6	1	3	4	4	0	8	3	1	4	1	4
ARF4-AS1	0	0	0	0	1	0	0	0	0	0	0	0
ARF4P1	0	0	0	0	0	0	0	0	0	1	0	0
ARF5	0	0	0	4	1	0	4	0	3	2	1	1
ARF5;FSCN3	0	0	0	1	0	0	0	0	0	0	0	0
ARF6	1	2	2	2	3	1	2	4	1	6	1	1
ARFGAP1	0	1	0	1	1	0	0	0	2	1	1	0
ARFGAP2	6	5	5	3	7	6	9	4	6	7	2	6
ARFGAP2;RP11-390K5.6	0	0	0	0	0	0	0	0	0	0	0	0
ARFGAP3	2	0	0	1	1	0	3	8	3	3	2	3
ARFGAP3;PACSIN2	2	0	2	5	0	8	10	3	3	4	5	12
ARFGEF1	6	1	0	3	6	4	12	9	2	6	2	1
ARFGEF2	5	2	0	4	6	20	9	7	5	5	0	5
ARFGEF3	23	9	18	51	38	72	59	47	43	43	27	39
ARFIP1	1	2	0	5	0	0	7	7	3	5	3	1
ARFIP2	5	1	3	3	5	18	9	10	4	3	10	9
ARFRP1	4	2	1	1	1	9	1	1	0	3	0	0
ARG1	0	0	0	0	0	0	0	0	0	1	0	1
ARG2	2	0	0	2	1	0	3	7	2	1	2	0
ARGLU1	88	21	19	33	51	61	59	58	40	61	26	58
ARHGAP1	8	2	1	5	4	10	6	9	0	3	3	7
ARHGAP10	2	2	4	0	6	11	8	12	5	8	6	13
ARHGAP11A	2	0	3	1	1	0	1	0	1	2	0	0
ARHGAP11B	0	0	0	0	0	0	1	0	1	0	0	1
ARHGAP12	2	0	2	5	5	3	2	10	3	12	1	13
ARHGAP17	8	4	5	3	3	2	4	2	3	4	2	1
ARHGAP18	3	2	3	3	9	5	5	8	6	4	7	19
ARHGAP19	0	0	0	0	0	0	0	0	0	0	1	0
ARHGAP19-SLIT1	1	0	0	2	1	0	1	2	1	0	0	3
ARHGAP19-SLIT1;ARHGAP19	2	1	1	0	0	6	0	2	0	0	0	1
ARHGAP20	1	0	0	4	1	9	2	4	0	5	1	0
ARHGAP21	3	1	0	3	0	0	2	2	2	2	1	2
ARHGAP22	1	0	0	0	0	0	0	0	0	0	0	0
ARHGAP23	0	0	0	2	0	0	0	2	0	0	0	0
ARHGAP24	1	2	1	7	1	7	3	4	1	5	2	0
ARHGAP25	0	0	0	0	0	0	2	1	0	2	0	0
ARHGAP26	5	1	0	1	2	4	4	2	3	2	0	0
ARHGAP27	0	0	0	1	0	1	1	0	1	1	0	0
ARHGAP28	2	3	1	0	0	0	1	0	0	0	0	0
ARHGAP29	1	2	0	1	1	4	2	4	2	2	1	8
ARHGAP30	0	0	0	0	0	0	0	0	0	1	0	0
ARHGAP31	0	0	0	0	0	0	0	0	0	0	0	0
ARHGAP32	4	2	3	2	5	0	7	19	6	6	0	9
ARHGAP33	2	0	0	1	1	6	1	1	6	2	0	6
ARHGAP35	6	1	5	3	10	11	10	7	4	6	1	5
ARHGAP36	0	0	0	0	0	0	0	0	0	0	0	0
ARHGAP39	4	0	1	0	0	0	2	4	1	0	2	1
ARHGAP4	0	0	1	0	0	0	1	0	2	1	0	0
ARHGAP4;NAA10	2	0	0	1	0	0	2	2	0	0	0	0
ARHGAP40	0	0	0	0	0	0	0	0	0	0	0	0
ARHGAP42	1	1	0	1	1	0	1	0	0	2	0	2
ARHGAP44	3	0	0	0	0	0	1	4	1	2	0	4
ARHGAP5	12	5	7	6	13	8	14	16	7	13	12	9
ARHGAP5-AS1	0	0	0	0	0	0	0	0	0	0	0	0
ARHGAP6	0	4	8	11	30	10	23	27	13	20	6	12
ARHGAP6;AC002366.3	0	0	0	0	0	0	0	1	0	2	0	0
ARHGAP6;MIR548AX	0	0	0	0	0	0	0	0	0	0	0	0
ARHGAP9	0	0	0	0	0	0	0	0	0	1	0	0
ARHGDIA	9	6	3	15	13	11	9	16	5	21	9	9
ARHGDIB	0	0	0	0	0	0	0	0	0	0	0	7
ARHGEF1	1	1	0	0	5	5	3	5	7	0	0	0
ARHGEF10	6	0	0	1	3	0	3	2	0	0	2	0
ARHGEF10L	1	3	3	3	8	6	11	13	6	3	4	4
ARHGEF11	6	3	2	4	3	3	3	5	6	6	1	1
ARHGEF12	7	1	3	0	7	17	7	15	5	8	4	8
ARHGEF16	2	1	0	0	1	4	1	0	0	1	3	1
ARHGEF17	4	0	0	0	0	0	0	2	0	1	0	1
ARHGEF19	1	0	0	0	0	0	0	0	0	0	1	0
ARHGEF2	7	3	8	3	6	0	5	6	3	1	0	2
ARHGEF25	1	0	0	0	1	0	0	1	0	0	0	0
ARHGEF26	3	0	2	4	5	19	2	7	1	5	2	3
ARHGEF26-AS1	0	0	1	0	0	0	0	0	1	0	0	0
ARHGEF28	3	0	0	3	5	9	4	9	2	6	1	0
ARHGEF3	1	0	0	3	2	0	4	1	2	5	3	4
ARHGEF33	2	0	0	0	1	0	0	1	1	1	1	0
ARHGEF38	0	1	1	2	1	0	0	0	0	1	1	1
ARHGEF39	0	0	0	0	0	1	1	1	0	0	0	3
ARHGEF4	1	0	2	1	2	0	0	0	1	2	1	0
ARHGEF40	2	1	0	4	6	4	4	5	5	4	0	0
ARHGEF5	0	0	0	1	0	0	0	0	0	0	0	0
ARHGEF7	11	1	2	7	2	5	12	16	7	8	5	4
ARHGEF7;ARHGEF7-IT1	0	1	1	1	0	0	0	0	0	0	0	0
ARHGEF9	9	2	5	11	4	2	18	13	7	8	10	7
ARID1A	14	6	10	16	13	13	11	13	15	10	7	17
ARID1B	15	5	8	6	1	5	19	21	17	9	3	16
ARID2	6	3	2	3	4	3	7	9	2	9	4	13
ARID3A	4	0	3	9	5	19	5	8	2	19	2	11
ARID3A;LLNLR-260G6.1	0	0	1	0	0	0	0	2	0	0	0	0
ARID3B	10	3	0	6	4	4	5	8	4	3	3	12
ARID4A	5	3	1	8	3	7	2	7	6	15	7	9
ARID4B	18	6	7	21	21	35	22	30	19	31	7	41
ARID5A	0	0	0	0	0	2	0	0	2	0	0	0
ARID5B	8	0	2	4	8	0	11	5	5	5	2	3
ARIH1	4	2	2	5	1	1	10	12	8	4	3	4
ARIH1;RP11-1006G14.4	0	0	0	0	0	0	0	1	0	0	0	0
ARIH2	19	5	14	15	28	58	25	32	19	19	9	40
ARIH2OS	0	0	0	1	1	0	0	1	1	0	0	0
ARIH2P1	0	0	0	0	1	0	0	0	0	0	0	0
ARL1	10	3	11	5	21	22	13	21	10	15	11	17
ARL10	1	0	1	5	3	3	1	5	0	4	1	3
ARL10;HIGD2A	4	3	0	1	1	2	2	2	0	1	5	10
ARL11	0	0	0	0	0	0	0	0	1	0	0	0
ARL13B	5	3	0	9	4	1	6	6	2	9	2	1
ARL14	0	0	0	1	0	0	0	0	0	0	0	0
ARL14EP	5	1	2	3	5	0	3	4	2	3	1	8
ARL15	10	5	7	14	5	7	17	15	14	12	7	8
ARL16	2	4	2	1	7	0	4	6	0	4	5	8
ARL17A	0	0	0	0	0	0	1	0	0	0	1	0
ARL17B	5	1	3	0	1	0	1	1	2	0	0	2
ARL2	0	0	0	1	0	0	5	0	2	0	2	1
ARL2-SNX15;SNX15	3	0	2	1	1	0	1	4	0	1	0	0
ARL2;ARL2-SNX15	1	0	0	1	0	17	0	3	0	4	1	1
ARL2;ARL2-SNX15;MIR6879	0	0	0	1	0	0	0	0	0	0	0	0
ARL2BP	3	0	1	0	0	1	1	3	1	0	0	2
ARL3	21	14	20	17	21	67	20	33	19	24	15	20
ARL4A	0	0	0	0	2	0	0	0	3	0	1	6
ARL4C	1	0	3	2	7	10	2	2	3	1	1	2
ARL4D	0	0	0	0	0	0	2	0	0	0	0	0
ARL5A	2	1	3	3	5	5	5	3	4	3	5	3
ARL5AP4	0	0	0	0	0	0	0	0	0	0	0	0
ARL5B	3	1	4	3	10	0	2	5	4	9	1	9
ARL6	1	0	0	1	1	0	2	3	3	0	1	3
ARL6IP1	7	5	3	16	18	34	9	20	8	20	6	16
ARL6IP1P2	0	0	0	0	0	0	0	1	0	0	0	0
ARL6IP5	7	2	3	4	6	14	4	10	5	15	6	37
ARL6IP6	0	0	0	0	2	0	0	2	0	1	1	0
ARL8A	1	0	0	0	0	5	3	1	1	1	0	0
ARL8B	8	3	0	2	11	18	7	6	5	9	1	14
ARL9	0	0	0	0	0	1	0	0	1	0	1	0
ARMC1	6	1	2	0	2	19	3	4	3	3	2	1
ARMC10	1	0	0	0	0	0	1	0	0	0	1	0
ARMC2	1	1	4	1	1	0	1	3	1	0	0	5
ARMC3	0	0	1	0	0	0	0	0	0	0	0	0
ARMC4P1	0	0	0	0	0	0	0	0	0	0	0	0
ARMC5	1	0	0	1	0	1	1	0	2	1	1	0
ARMC6	2	0	0	0	1	0	0	1	1	2	0	14
ARMC7	0	0	0	1	0	0	1	2	1	0	0	0
ARMC8	14	2	6	9	10	27	6	19	5	22	3	18
ARMC9	11	4	0	2	5	7	3	1	2	6	1	5
ARMCX1	3	1	1	2	4	6	2	4	2	2	2	2
ARMCX2	5	0	3	1	1	3	0	1	3	1	0	2
ARMCX3	10	4	2	13	24	13	16	11	5	28	7	15
ARMCX3-AS1	0	0	0	0	0	0	0	0	0	0	0	0
ARMCX3;AC234775.1	0	0	0	0	0	0	0	0	0	0	0	0
ARMCX4	3	1	2	4	3	8	4	5	6	2	3	6
ARMCX5	0	0	0	0	0	0	0	2	0	0	0	0
ARMCX5;RP4-769N13.6	1	3	0	1	3	3	2	0	2	5	1	7
ARMCX6	0	0	0	0	4	0	1	0	0	1	1	4
ARMT1	4	4	2	13	12	2	11	17	6	17	4	31
ARNT	8	0	2	4	3	6	6	7	8	7	3	3
ARNT2	18	6	10	19	18	19	15	17	16	21	14	23
ARNTL	2	0	1	3	5	1	2	4	1	2	0	5
ARNTL2	3	1	1	2	3	3	2	1	1	1	0	3
ARPC1A	3	1	3	3	5	0	6	14	6	8	3	12
ARPC1A;ARPC1B	0	0	0	2	3	1	1	3	0	3	3	0
ARPC1B	1	0	1	1	0	0	2	3	3	0	0	0
ARPC2	4	2	10	8	15	32	17	15	8	13	8	25
ARPC3	17	5	9	25	15	43	22	29	13	28	14	51
ARPC3P1	0	0	0	0	0	1	0	0	0	0	0	0
ARPC4	0	0	0	3	0	2	5	1	2	0	0	0
ARPC4-TTLL3;TTLL3	1	0	0	3	3	0	1	0	1	1	0	2
ARPC4;ARPC4-TTLL3	5	1	0	0	1	0	0	4	2	4	3	7
ARPC5	5	1	2	1	4	1	5	2	2	8	2	5
ARPC5L	3	4	1	4	6	7	6	4	3	7	10	10
ARPIN	0	0	0	0	2	0	2	0	0	2	0	0
ARPP19	10	1	5	6	10	16	12	12	5	5	3	9
ARPP21	0	0	0	0	1	0	0	0	0	0	0	0
ARRB1	3	1	0	0	1	1	4	3	3	3	2	4
ARRB2	4	2	1	2	1	0	2	3	1	0	0	1
ARRDC1	0	1	0	3	3	2	0	2	2	1	3	7
ARRDC1-AS1	0	0	0	0	1	0	0	0	0	0	0	2
ARRDC2	0	0	0	1	0	0	0	1	0	1	0	0
ARRDC3	16	12	5	15	4	9	15	20	7	3	3	6
ARRDC3-AS1	1	0	1	0	0	0	2	1	0	0	0	0
ARRDC4	7	2	1	5	6	3	8	1	3	5	4	0
ARSA	2	0	1	1	0	4	0	1	1	1	1	1
ARSB	1	0	1	1	2	0	3	0	2	2	1	1
ARSD	0	0	0	0	0	1	1	2	0	2	0	0
ARSE	0	0	0	0	0	0	0	0	0	0	0	3
ARSG	0	0	0	1	0	0	4	2	1	2	1	0
ARSG;RP11-120M18.2	0	0	0	0	1	0	0	1	0	0	1	4
ARSJ	0	0	0	0	0	0	0	0	0	0	1	0
ARSK	0	0	1	1	0	0	3	0	0	1	2	0
ART4	0	0	0	0	1	0	0	0	0	0	0	0
ARV1	4	0	1	0	1	0	1	1	0	0	0	0
ARVCF	13	3	3	6	6	4	5	3	1	3	0	4
ARX	8	3	1	3	3	2	5	6	3	3	1	1
ASAH1	13	6	13	19	42	104	34	56	23	70	33	74
ASAH2B	3	0	2	2	2	1	0	2	2	3	3	3
ASAP1	11	4	7	15	19	22	27	32	23	11	9	15
ASAP2	5	2	0	4	0	0	4	3	4	0	0	9
ASAP3	1	0	1	3	0	0	1	1	0	0	0	0
ASB1	0	0	0	1	2	0	3	1	1	0	2	0
ASB13	1	0	0	1	0	0	2	1	0	0	3	1
ASB15	0	0	0	0	0	0	0	0	0	0	1	0
ASB16	0	0	0	1	0	0	0	0	0	0	1	0
ASB16-AS1	1	0	0	1	1	0	2	0	0	1	0	0
ASB18	0	0	0	0	0	0	0	0	1	0	0	0
ASB4	0	0	1	1	0	0	4	2	1	1	0	0
ASB6	1	0	0	2	2	0	3	5	1	5	1	0
ASB7	1	0	2	2	2	0	2	1	3	2	0	0
ASB8	3	0	0	0	1	0	3	1	1	2	1	0
ASB9	0	0	1	0	0	0	0	0	0	0	0	0
ASCC1	3	0	1	3	6	1	7	3	3	3	2	1
ASCC2	5	0	0	1	4	0	1	3	3	2	2	1
ASCC3	6	3	6	11	15	7	15	17	15	7	13	10
ASCL1	9	2	8	12	16	20	12	20	12	13	4	23
ASCL2	0	3	0	5	9	5	6	2	1	6	5	1
ASF1A	3	0	0	0	4	3	0	3	0	0	0	0
ASF1B	0	0	0	0	0	0	0	0	0	1	0	5
ASGR1	1	0	0	0	0	0	0	1	0	1	0	0
ASGR2	0	0	0	0	1	0	0	0	0	0	1	0
ASH1L	10	3	8	2	8	3	21	16	11	22	6	6
ASH1L-AS1	0	1	0	2	1	0	1	0	0	0	1	2
ASH2L	4	2	1	6	3	0	5	3	2	7	1	8
ASIC1	0	0	0	0	0	0	0	0	0	0	0	1
ASIC2	13	11	0	1	5	2	2	4	0	2	1	0
ASIC2;RP11-1086I4.2	1	0	0	0	0	0	0	0	0	0	0	0
ASIC2;TLK2P1	1	0	0	1	5	0	1	2	1	1	1	1
ASIC4	0	0	0	2	0	0	0	1	2	1	0	0
ASL	3	2	1	3	0	5	1	2	0	1	2	0
ASL;AC068533.7	0	0	0	1	0	0	0	0	0	0	0	1
ASNA1	3	1	0	0	0	0	0	0	1	2	0	0
ASNS	4	2	0	3	2	0	3	3	1	2	2	6
ASNSD1	7	4	0	1	1	6	8	2	3	4	2	7
ASNSP1	0	0	0	0	0	0	0	0	0	0	0	0
ASPH	10	6	11	15	27	6	29	49	19	17	12	44
ASPHD1	0	0	3	1	4	5	5	5	1	3	3	2
ASPM	1	0	1	1	1	0	2	1	3	0	0	0
ASPRV1	0	0	0	0	0	0	1	0	0	0	0	0
ASPSCR1	0	0	0	0	2	3	1	2	1	2	0	0
ASRGL1	1	3	0	1	0	0	1	0	1	1	0	0
ASS1	0	0	1	6	2	0	2	3	3	5	1	4
ASTE1	2	0	0	0	0	0	0	2	0	0	1	4
ASTN1	3	0	0	0	0	0	0	0	1	1	0	0
ASTN2	5	1	2	20	15	13	27	36	19	10	9	15
ASUN	0	4	1	2	4	1	4	3	4	1	2	0
ASXL1	1	0	1	4	3	0	4	2	1	3	0	2
ASXL2	2	0	4	3	1	2	4	7	1	4	3	2
ASXL2;TPM3P7	0	0	0	0	0	0	0	0	0	0	0	0
ASXL3	5	1	5	4	2	0	3	0	0	2	0	0
ATAD1	3	0	3	8	3	3	10	4	3	3	2	6
ATAD2	4	2	3	5	8	9	4	6	5	4	4	3
ATAD2B	10	6	3	4	6	13	10	9	6	6	4	8
ATAD3A	0	2	0	0	1	0	1	1	1	1	0	0
ATAD3B	2	0	0	1	0	0	0	1	0	0	1	2
ATAD3C	0	0	0	0	0	0	0	0	1	2	0	0
ATAD5	0	0	0	0	0	0	4	2	0	0	0	0
ATAT1	4	3	2	3	0	1	7	6	1	2	0	1
ATAT1;PTMAP1	0	0	0	0	0	0	0	1	0	0	0	0
ATCAY	1	1	0	2	1	0	0	0	1	1	0	0
ATE1	2	4	5	6	8	16	4	13	7	7	5	8
ATE1-AS1	0	1	0	0	0	0	0	1	0	0	0	2
ATF1	5	0	1	3	6	1	4	2	1	3	2	0
ATF2	7	0	2	6	6	5	8	7	6	10	4	3
ATF3	0	0	0	0	0	0	0	0	0	1	2	2
ATF4	2	3	2	6	4	9	3	2	4	6	3	3
ATF4P4;RP11-667M19.5	0	0	0	0	0	0	0	1	0	0	0	0
ATF5	0	0	1	0	0	12	0	2	0	1	0	0
ATF5;MIR4751	0	0	0	0	0	0	0	0	0	0	0	0
ATF6	5	4	4	3	2	2	8	7	3	8	3	3
ATF6B	9	5	5	10	8	6	11	17	6	10	5	4
ATF7	1	1	0	2	2	2	1	0	2	1	0	2
ATF7IP	8	1	3	4	9	6	11	4	14	2	6	4
ATF7IP2	2	1	1	0	0	0	0	3	2	0	0	0
ATG10	1	1	0	0	1	0	5	2	3	4	0	2
ATG101	0	0	0	0	2	0	1	1	0	0	1	6
ATG12	5	0	1	1	0	1	3	3	3	4	3	11
ATG13	4	2	3	3	5	2	2	2	4	4	7	3
ATG14	3	1	0	3	1	4	1	0	2	4	3	2
ATG16L1	2	1	5	3	2	2	3	3	1	7	6	6
ATG16L1;SCARNA5	1	0	0	0	0	0	0	0	0	1	0	0
ATG16L1;SCARNA6	0	0	0	0	2	0	0	0	0	0	0	0
ATG16L2	4	0	1	0	1	2	2	0	2	1	0	0
ATG2A	2	0	0	0	5	3	2	4	1	0	0	1
ATG2A;MIR6749	1	0	0	0	0	0	0	0	0	0	0	0
ATG2B	2	1	1	0	5	1	2	3	3	7	1	5
ATG3	7	1	8	11	15	13	9	13	10	18	8	18
ATG4A	0	0	0	1	0	0	1	1	2	1	0	6
ATG4AP1	0	0	0	0	1	0	0	0	0	0	0	0
ATG4B	3	1	0	2	1	2	6	2	1	4	2	6
ATG4C	0	0	0	0	0	0	2	2	1	1	0	0
ATG4D	0	1	0	0	1	0	0	2	0	1	0	0
ATG5	2	1	2	6	1	5	3	2	3	3	1	8
ATG7	4	1	1	2	7	0	2	7	7	4	2	6
ATG9A	7	1	3	8	7	3	7	11	7	7	3	16
ATG9B	0	0	0	0	1	0	0	0	0	2	0	2
ATIC	1	0	1	0	2	0	4	1	2	2	1	0
ATL1	0	0	0	1	2	0	2	0	0	2	0	4
ATL2	0	0	0	2	1	0	4	1	2	2	0	3
ATL3	0	1	0	0	2	0	1	0	4	0	0	0
ATM	6	1	2	6	5	1	5	15	2	2	1	0
ATMIN	1	1	0	0	0	0	0	3	0	3	0	0
ATN1	7	0	3	9	7	14	3	8	9	4	5	3
ATOX1	0	1	0	2	2	6	5	4	0	3	2	2
ATP10A	0	0	0	0	0	1	0	0	0	0	0	0
ATP10B	0	0	0	0	0	0	0	1	0	0	0	0
ATP10D	8	0	2	2	1	10	6	0	0	3	1	0
ATP11A	12	0	1	2	8	6	11	9	7	0	1	8
ATP11A;RP11-73M11.3	0	0	0	0	0	0	0	0	0	0	0	0
ATP11B	2	1	1	4	3	26	4	5	2	6	2	2
ATP11C	0	0	0	2	0	0	0	0	2	2	2	2
ATP13A1	4	1	0	3	4	3	7	4	2	3	2	3
ATP13A2	2	1	0	1	1	16	5	1	4	2	0	0
ATP13A3	2	0	1	2	2	7	8	3	4	6	1	0
ATP13A3;AC108676.1	0	0	0	0	0	0	0	1	0	0	0	0
ATP13A4	0	0	0	0	0	0	0	1	0	0	0	0
ATP13A4;RP11-175P19.2	0	0	0	0	0	0	0	0	1	0	0	0
ATP1A1	9	7	4	6	14	36	12	6	10	8	5	26
ATP1A1-AS1	1	1	4	0	1	13	1	5	0	0	0	0
ATP1A3	0	0	0	2	2	1	1	1	2	0	0	0
ATP1A4	0	0	0	0	0	0	0	0	0	0	0	0
ATP1B1	11	2	5	19	18	26	23	25	10	23	10	34
ATP1B2	0	0	0	0	0	0	2	1	0	2	1	2
ATP1B3	2	1	2	4	8	3	3	3	2	3	1	4
ATP1B3P1	0	0	0	0	0	0	1	0	0	0	0	2
ATP2A1-AS1	0	0	0	0	0	0	0	1	0	0	0	0
ATP2A2	6	1	4	6	9	4	9	9	12	7	1	4
ATP2A3	20	1	7	14	8	6	6	11	13	8	3	6
ATP2B1	18	6	10	27	34	29	31	45	35	35	20	37
ATP2B2	0	0	0	0	1	0	0	0	2	2	1	0
ATP2B3	0	0	0	0	0	3	0	0	0	0	0	0
ATP2B4	17	8	3	10	12	7	20	16	8	10	6	8
ATP2C1	6	1	2	1	4	13	6	6	2	4	1	14
ATP2C2	1	0	0	0	1	1	1	0	1	2	2	1
ATP4B	0	0	0	0	0	0	0	0	1	0	0	0
ATP5A1	11	4	4	9	21	30	6	17	10	19	3	18
ATP5B	8	3	2	4	10	6	8	8	3	9	3	5
ATP5C1	9	3	11	16	24	16	19	17	14	18	14	21
ATP5D	9	3	11	23	15	32	24	29	8	26	12	27
ATP5E	17	8	12	9	20	14	24	19	13	23	15	28
ATP5EP2	2	1	0	1	1	0	1	3	1	2	2	1
ATP5F1	4	1	4	7	12	16	10	15	5	11	10	16
ATP5F1P7	0	0	0	0	1	0	0	0	0	0	0	0
ATP5G1	1	2	0	1	0	0	0	1	0	1	2	1
ATP5G2	6	4	0	4	1	0	7	7	1	8	1	0
ATP5G3	2	1	2	3	2	9	3	1	4	2	3	3
ATP5H	25	12	22	27	29	45	24	45	27	42	25	29
ATP5HP2	0	0	0	0	0	0	1	0	0	0	0	0
ATP5HP4	0	0	0	1	1	1	0	0	0	0	0	0
ATP5I	6	6	4	5	5	15	3	8	4	9	6	10
ATP5J	29	9	14	27	34	46	36	50	22	38	21	57
ATP5J2	0	0	0	0	0	0	0	0	0	0	1	0
ATP5J2-PTCD1;ATP5J2	6	0	1	5	2	7	3	4	2	6	3	10
ATP5L	12	10	15	34	27	38	23	33	20	23	14	41
ATP5S	0	0	0	1	0	0	1	0	1	1	0	0
ATP5SL	3	0	0	5	2	12	4	2	0	1	1	5
ATP6AP1	13	0	1	13	15	1	21	24	17	18	8	25
ATP6AP1L	1	3	0	0	0	3	1	2	0	0	0	1
ATP6AP2	12	6	11	18	21	55	25	29	15	26	30	40
ATP6V0A1	11	8	6	10	16	19	23	18	19	19	6	18
ATP6V0A1;RP11-194N12.2	0	0	0	1	0	0	0	0	0	0	0	0
ATP6V0A1;RP11-400F19.18	0	0	0	1	0	0	1	2	1	0	0	1
ATP6V0A2	3	2	0	4	2	0	4	2	1	8	3	1
ATP6V0B	5	0	1	9	4	0	4	6	2	11	8	2
ATP6V0CP3	0	0	0	0	0	0	0	0	1	0	0	0
ATP6V0D1	3	1	6	6	9	5	8	7	8	16	8	13
ATP6V0D2	0	0	0	0	1	0	0	0	0	0	0	0
ATP6V0E1	2	2	6	12	8	17	11	12	9	25	5	25
ATP6V0E1P3	0	0	0	0	0	0	0	0	0	0	0	0
ATP6V0E2	5	3	1	7	4	11	9	7	4	6	3	1
ATP6V0E2-AS1	1	0	2	1	0	0	0	0	0	3	2	0
ATP6V1A	5	0	4	4	6	7	10	2	6	10	3	16
ATP6V1B1	0	0	0	0	0	0	0	1	0	0	0	0
ATP6V1B2	17	4	6	15	23	45	17	25	7	28	19	22
ATP6V1C1	7	3	2	3	3	6	4	8	2	14	10	13
ATP6V1C2	0	0	0	0	0	1	0	0	0	0	0	0
ATP6V1D	0	1	2	5	6	1	3	7	2	9	3	8
ATP6V1E1	4	2	4	6	5	11	5	5	4	8	7	1
ATP6V1E1P1	0	0	0	0	0	1	0	0	0	0	0	0
ATP6V1E2	1	0	0	0	0	0	0	1	0	0	0	0
ATP6V1F	3	2	2	3	1	2	3	3	2	4	2	8
ATP6V1G1	21	12	10	26	30	20	30	39	20	31	25	33
ATP6V1G2	0	0	0	1	0	0	0	0	0	0	1	1
ATP6V1G2-DDX39B;ATP6V1G2	1	0	0	0	0	0	1	0	0	0	0	0
ATP6V1H	3	1	3	6	6	3	5	9	6	4	2	7
ATP7A	1	0	2	2	1	9	0	2	0	1	1	3
ATP7A;RP5-1000K24.2	0	0	3	0	0	0	0	0	0	1	0	0
ATP7B	0	0	0	2	3	1	1	3	2	0	0	0
ATP8A1	12	2	0	4	2	1	5	13	3	2	3	2
ATP8A1;CCNL2P1	1	0	0	0	0	0	0	0	0	0	0	0
ATP8A2	1	0	0	2	0	0	1	1	1	0	0	0
ATP8B1	0	0	2	1	5	0	1	5	2	4	1	2
ATP8B2	5	3	0	1	1	2	2	2	1	4	3	2
ATP8B4	0	0	0	0	0	0	0	0	0	0	0	1
ATP8B5P	0	0	0	0	0	0	0	2	1	0	0	0
ATP8B5P;ZFAND6P1	0	0	0	0	0	0	1	0	0	0	0	0
ATP9A	14	4	3	6	14	10	17	11	11	5	2	10
ATP9B	5	1	3	2	4	13	3	13	4	1	2	6
ATP9B;CTD-2286N8.1	0	0	0	0	0	0	0	0	0	1	0	0
ATPAF1	2	0	4	2	4	9	6	7	1	5	2	1
ATPAF2	3	4	3	1	4	17	5	2	4	2	0	2
ATPIF1	17	7	15	13	21	29	14	34	15	30	23	18
ATR	4	3	0	3	1	1	5	2	1	0	1	1
ATRAID	5	2	1	4	1	3	7	5	6	10	4	7
ATRIP	0	0	0	0	0	0	0	1	0	0	0	0
ATRN	3	3	0	3	5	0	6	10	2	5	2	4
ATRNL1	3	0	3	3	1	2	7	4	10	3	1	0
ATRX	20	9	10	29	15	34	31	23	19	34	8	24
ATXN1	4	3	0	4	9	10	4	6	2	6	5	10
ATXN10	2	2	1	6	2	0	8	11	6	5	3	8
ATXN1L;IST1	2	3	3	1	3	0	1	1	3	2	1	0
ATXN2	8	2	4	3	8	3	5	14	3	9	1	11
ATXN2L	7	1	3	4	0	10	6	5	4	3	4	3
ATXN3	2	2	0	1	0	0	3	4	3	3	1	1
ATXN7	3	5	0	5	4	1	10	5	5	3	1	3
ATXN7L1	7	0	5	2	10	9	16	14	9	5	6	2
ATXN7L2	3	0	1	0	3	0	1	0	0	0	0	1
ATXN7L3	1	0	1	0	0	0	1	0	0	0	0	0
ATXN7L3B	12	2	7	7	4	22	4	14	6	9	5	14
AUH	3	3	0	2	1	0	5	4	1	5	2	1
AUNIP	0	0	0	1	1	0	0	0	0	0	0	0
AUP1	2	0	12	2	9	0	8	8	5	8	3	4
AURKA	0	0	0	0	2	0	2	8	2	3	0	0
AURKAIP1	7	6	2	9	5	10	10	16	5	7	3	13
AURKB	0	0	1	0	0	0	0	0	1	0	0	0
AURKC	1	0	0	0	0	0	0	0	0	0	0	0
AUTS2	15	14	5	12	12	27	23	15	18	11	5	15
AVEN	0	1	0	1	2	2	2	2	2	3	0	6
AVIL	0	0	0	1	0	1	0	0	0	1	0	0
AVL9	2	2	1	4	1	2	6	9	5	2	9	13
AVPI1	0	0	0	0	0	0	1	1	0	0	0	0
AVPR1B	0	0	0	0	0	0	0	1	0	1	0	0
AXIN1	1	0	0	1	0	6	1	1	1	1	0	2
AXIN2	0	1	0	0	0	0	0	0	0	1	0	0
AXIN2;CTD-2535L24.2	3	0	2	1	0	4	3	4	0	0	1	0
AXL	0	0	0	0	0	0	0	0	0	0	0	0
AZI2	3	3	0	7	0	11	2	6	3	3	7	9
AZIN1	5	4	3	3	6	0	5	14	5	5	2	10
AZIN1-AS1	0	0	0	0	0	1	2	2	0	0	0	0
AZIN2	0	0	0	0	1	0	2	0	1	1	0	2
B2M	12	8	16	43	30	24	45	33	18	60	26	56
B3GALNT1	2	0	1	4	3	1	1	5	0	2	0	2
B3GALNT2	3	3	0	2	2	1	4	8	7	3	1	4
B3GALT1	4	1	0	1	0	0	0	0	0	1	0	0
B3GALT2	2	1	0	1	1	0	1	1	1	1	0	1
B3GALT4	1	0	1	2	0	0	0	1	0	0	1	0
B3GALT5	0	0	0	1	0	0	0	0	0	3	1	0
B3GALT5-AS1	0	0	0	0	0	0	0	0	0	0	1	0
B3GALT5;AF064860.5	2	1	2	0	0	0	3	1	2	0	0	1
B3GALT6	0	0	0	1	1	6	0	2	1	0	0	0
B3GAT1	1	0	1	5	3	0	0	3	3	2	2	0
B3GAT3	0	0	1	2	0	1	2	0	0	4	2	0
B3GLCT	1	0	0	2	0	0	1	1	0	2	0	0
B3GNT2	4	0	1	2	1	1	1	3	2	9	4	9
B3GNT3	0	0	0	0	0	0	0	0	0	0	0	0
B3GNT5	1	1	0	1	2	0	2	2	0	2	0	3
B3GNT7	1	0	1	2	0	0	0	2	0	0	1	0
B3GNT8	0	0	0	0	0	0	0	2	0	1	0	0
B3GNT9	0	0	0	0	0	0	0	0	1	0	0	0
B3GNTL1	0	0	2	0	0	0	1	0	0	0	0	0
B4GALNT1	0	0	0	1	0	0	1	0	0	0	0	0
B4GALNT2	0	0	0	0	0	0	0	0	0	0	1	0
B4GALNT3	2	0	1	3	1	0	1	0	1	5	2	2
B4GALNT4	2	2	0	1	1	0	0	0	0	2	0	0
B4GALT1	3	0	0	1	1	2	6	4	4	4	3	1
B4GALT1-AS1	0	0	0	0	0	0	0	1	0	1	0	0
B4GALT2	1	1	0	0	0	0	0	0	0	1	0	3
B4GALT3	0	0	1	4	2	0	0	1	3	1	1	1
B4GALT4	2	0	1	2	2	3	7	5	2	1	1	1
B4GALT4-AS1	0	0	0	0	0	0	0	0	0	0	1	0
B4GALT5	5	0	0	3	1	8	3	1	2	2	1	0
B4GALT6	1	0	1	3	0	0	2	2	2	1	1	0
B4GALT7	1	1	3	2	0	0	0	2	0	0	2	0
B4GAT1	7	0	1	0	4	0	5	6	0	5	2	3
B9D1	2	2	1	1	1	0	4	1	3	1	0	5
B9D2	3	2	0	1	0	0	0	1	0	0	0	0
BAALC	13	8	2	11	15	15	10	11	5	15	11	13
BAALC-AS1	0	0	0	0	2	4	3	4	2	0	0	1
BAALC-AS2	0	0	0	0	1	0	0	0	0	0	0	0
BAAT	0	0	0	0	0	0	0	0	0	0	0	0
BABAM1	0	0	0	0	0	0	0	0	0	0	0	0
BABAM1;CTD-2278I10.6	6	4	3	3	4	0	5	6	3	9	4	6
BACE1	6	2	8	15	11	21	21	10	9	8	2	6
BACE2	0	0	0	0	0	0	0	0	0	0	0	0
BACH1	1	2	6	6	5	12	11	7	8	15	0	16
BACH1;BACH1-IT1	0	0	0	2	2	0	0	1	0	0	0	1
BACH1;BACH1-IT2	0	0	0	0	0	0	0	0	0	0	0	2
BACH2	0	0	1	13	1	10	3	6	5	13	1	6
BAD	0	0	1	3	2	1	2	3	0	2	0	1
BAG1	8	3	2	5	3	2	3	5	1	2	2	5
BAG2	2	0	0	0	1	2	2	1	1	0	1	0
BAG3	0	1	0	0	0	5	2	1	1	0	1	0
BAG4	5	0	1	2	0	0	3	4	3	1	3	0
BAG5	3	3	2	10	5	7	6	11	3	5	2	21
BAG6	16	4	4	7	4	14	13	8	10	16	3	7
BAHCC1	4	0	1	0	1	1	2	1	0	3	1	0
BAHD1	1	0	3	1	2	5	2	6	2	2	3	3
BAIAP2	6	1	3	13	7	16	3	2	4	10	7	8
BAIAP2-AS1	0	1	0	2	2	2	3	1	2	0	0	4
BAIAP2L1	0	1	0	10	1	0	3	3	4	6	5	5
BAIAP2L2	0	1	0	0	0	0	0	0	0	0	0	0
BAIAP3	4	0	0	1	1	2	1	4	1	1	1	0
BAK1	3	0	0	1	1	8	0	3	1	0	1	3
BAMBI	2	0	0	0	0	0	0	0	0	1	0	0
BANF1	1	1	0	1	3	8	2	1	3	2	1	5
BANK1	0	0	0	0	0	0	0	0	0	0	0	0
BANP	2	3	1	3	4	1	4	3	5	2	0	1
BAP1	4	1	0	1	3	1	1	1	1	1	1	0
BARD1	1	0	0	0	0	0	1	0	0	2	0	0
BASP1	12	4	2	5	7	8	3	8	1	9	5	3
BATF	1	0	0	0	0	0	0	0	0	0	0	0
BAX	3	0	3	3	3	5	7	7	2	10	2	3
BAZ1A	5	3	1	3	3	2	4	1	2	5	3	5
BAZ1B	14	6	5	4	7	14	18	22	8	15	8	25
BAZ2A	5	2	9	7	18	37	9	17	9	12	5	9
BAZ2B	17	9	4	20	19	22	18	35	20	39	15	26
BAZ2B;AC009506.2	0	1	0	0	0	0	0	0	0	0	0	0
BAZ2B;Y_RNA	0	0	0	0	0	0	0	0	0	0	0	0
BBC3	0	0	0	0	1	0	0	0	0	1	1	0
BBIP1	0	0	0	0	0	0	1	0	0	1	0	0
BBOX1	0	0	0	0	0	0	1	0	0	0	0	0
BBOX1-AS1	1	0	0	0	0	0	0	1	0	0	0	1
BBS10	0	0	0	0	0	0	1	0	0	0	0	0
BBS12	1	0	0	0	0	0	0	3	0	0	0	0
BBS2	3	0	0	2	0	9	3	1	2	3	0	0
BBS4	5	1	3	0	2	0	2	3	1	4	0	5
BBS5	0	0	0	0	0	0	0	0	0	0	0	0
BBS5;RP11-724O16.1	1	0	0	0	1	0	0	3	1	0	0	1
BBS7	4	0	2	2	2	2	4	0	1	3	2	4
BBS9	4	0	1	0	3	0	5	5	0	2	0	0
BBX	15	6	4	10	29	2	10	24	13	9	6	17
BCAM	4	1	2	5	6	7	6	9	10	3	5	8
BCAN	0	0	0	0	0	0	1	1	0	0	1	0
BCAP29	1	1	0	12	5	5	5	13	1	8	2	25
BCAP31	12	10	14	13	9	4	27	21	19	22	22	30
BCAR1	7	0	0	2	1	0	3	2	3	2	3	1
BCAR1;RP11-331F4.5	1	0	0	0	0	0	0	0	0	0	0	0
BCAR3	10	3	1	6	2	7	4	9	3	10	3	4
BCAS2	6	1	1	3	10	12	7	11	4	13	4	7
BCAS2P2	0	0	0	0	0	0	0	0	0	0	0	0
BCAS3	4	0	2	2	4	8	6	6	5	3	1	1
BCAS3;RP11-332H18.3	0	0	1	0	0	0	0	0	0	0	0	0
BCAS4	2	0	2	0	1	0	2	1	2	2	0	0
BCAT1	2	2	2	0	2	0	0	1	0	1	0	2
BCAT2	3	0	0	1	0	0	2	0	0	3	1	0
BCCIP	7	2	2	8	9	3	8	3	5	12	9	20
BCDIN3D	1	0	1	1	0	0	0	1	1	1	0	0
BCDIN3D-AS1	0	0	0	0	0	0	0	0	0	0	0	2
BCHE	0	0	0	0	0	0	0	2	0	0	1	0
BCKDHB	9	2	8	9	13	3	14	24	15	8	4	19
BCKDK	1	1	1	0	0	1	2	1	1	2	1	2
BCKDK;AC135050.1	0	0	0	0	0	0	0	0	0	0	0	0
BCL10	3	0	0	2	2	0	1	4	3	4	1	3
BCL11A	2	3	0	0	0	0	0	1	0	0	1	0
BCL2	1	1	0	0	1	0	4	0	0	1	0	0
BCL2L1	10	4	9	15	9	19	13	11	10	11	6	14
BCL2L11	3	0	0	1	0	0	2	0	0	1	0	1
BCL2L13	2	0	0	0	1	0	1	3	3	2	4	2
BCL2L14	0	0	0	0	0	0	0	0	1	2	0	0
BCL2L2	0	0	0	0	1	1	0	0	1	1	0	0
BCL2L2-PABPN1	0	1	0	2	1	0	1	0	1	1	0	0
BCL2L2-PABPN1;PABPN1	9	3	2	12	8	7	6	11	6	4	5	8
BCL2L2;BCL2L2-PABPN1	4	0	2	8	8	9	3	8	7	5	2	0
BCL3	1	0	0	1	0	1	2	0	0	1	0	1
BCL6	1	1	0	0	3	0	1	0	1	1	0	0
BCL7A	9	5	4	4	6	10	4	6	8	4	5	12
BCL7B	3	0	1	4	6	2	9	5	2	11	5	5
BCL7C	0	0	0	1	0	0	0	3	2	1	0	0
BCL7C;AC106782.20	0	0	0	0	0	0	1	0	0	0	0	0
BCL9	6	1	1	5	4	5	9	7	1	6	9	22
BCL9L	3	0	1	2	2	2	5	1	0	4	2	6
BCLAF1	7	5	3	10	15	17	11	14	7	5	8	24
BCO1	0	0	0	0	3	0	0	0	1	0	0	0
BCOR	4	2	0	6	7	2	4	5	3	7	5	15
BCORL1	6	1	2	1	2	0	1	3	3	5	2	2
BCR	6	2	0	5	3	2	8	4	2	1	2	12
BCR;FBXW4P1	0	0	0	0	0	0	0	0	0	1	0	0
BCS1L	2	1	1	3	2	0	1	3	1	3	1	1
BDH1	1	0	2	1	0	0	4	6	3	1	1	1
BDH2	0	0	0	0	1	2	0	0	2	2	1	0
BDH2P1	0	0	0	0	0	0	0	1	0	0	0	0
BDKRB2;RP11-404P21.8	0	0	0	1	0	0	3	0	1	1	1	4
BDNF	2	0	0	0	0	12	1	1	0	1	0	0
BDNF-AS	1	1	0	0	0	0	1	3	1	0	1	1
BDNF;RP11-587D21.4	0	0	0	0	1	0	0	0	0	1	0	0
BDP1	34	15	14	32	31	49	29	50	33	45	20	53
[truncated: 19,015 more rows]
