# Supplementary material for: Analysis of the transcriptome and metabolome of pancreatic spheroids derived from human induced pluripotent stem cells and matured in an organ-on-a-chip
Source: Royal Society of Chemistry journal article supplement (doi:10.1039/d2mo00132b), 2022-07-12
Supplement: d2mo00132b9.xlsx [file d2mo00132b9.xlsx]

## Sheet: Feuil1
Sample	3D-Petri_1	3D-Petri_2	3D-Petri_3	3D-Petri_4	3D-Petri_5	3D-Petri_6	3D-Petri_7	3D-Petri_8	3D-Petri_9	3D-Petri_10	3D-Petri_11	3D-Petri_12	3D-Petri_13	3D-Petri_14	3D-Petri_15	3D-Petri_16	3D-Petri_17	3D-Petri_18	3D-Biochip_1	3D-Biochip_2	3D-Biochip_3	3D-Biochip_4	3D-Biochip_5	3D-Biochip_6	3D-Biochip_7	3D-Biochip_8	3D-Biochip_9
label	day 2	day 2	day 2	day 2	day 2	day 2	day 2	day 2	day 2	day 16	day 16	day 16	day 16	day 16	day 16	day 16	day 16	day 16	day 16	day 16	day 16	day 16	day 16	day 16	day 16	day 16	day 16
hexanoic acid	0,011236399	0,010883599	0,004728784	0,007465223	0,00651694	0,008613542	0,054915593	0,063403947	0,070737433	0,019789173	0,019440282	0,008301295	0,012623556	0,011003005	0,01430776	0,060245206	0,003143972	0,00346415	0,012571473	0,012831378	0,010880868	0,010745618	0,010457411	0,010327861	0,010923491	0,008200293	0,035905612
glycolic acid	0,011785741	0,011480834	0,003484632	0,006059053	0,005978782	0,007639342	0,01463564	0,029732478	0,015247823	0,012161553	0,014942074	0,00517047	0,009344116	0,008302364	0,00794931	0,004196754	0,002710441	0,00230489	0,007823591	0,008266818	0,010158979	0,005010993	0,005225012	0,006542606	0,006151327	0,004217624	0,009180612
L-alanine	0,002213722	0,001075624	0,021334421	0,035624219	0,031883789	0,037986027	0,000225279	0,000910872	0,000120935	0,001462624	0,001305567	0,000835092	0,000831262	0,000876216	0,000871992	-1,50E-06	1,09E-06	3,39E-06	0,000126471	0,000173401	8,51E-05	0,002291378	0,015137088	0,008693533	0,004448258	0,004537129	5,55E-05
valine	0,011050623	0,010408405	0,005768958	0,009546502	0,007962071	0,009367816	0,004035438	0,006179193	0,005103588	0,010713253	0,011360662	0,005478049	0,005566851	0,006416854	0,006637244	0,005626961	0,002797285	0,004159285	0,008907698	0,012690766	0,008552334	0,008323079	0,011449676	0,011934753	0,009311827	0,009034689	0,007146297
acetohydroxamic acid	0,011982123	0,008426566	0,003812246	0,007580702	0,005794192	0,00725966	0,001640858	0,002636541	0,005680528	0,019454004	0,015161732	0,009357758	0,010325018	0,003233166	0,011404414	0,011770011	0,007756869	0,004213329	0,028055431	0,018722492	0,018878094	0,024388926	0,016790882	0,011056192	0,024902493	0,016708461	0,030115906
2-hydroxybutyric acid	0,004063501	0,004742959	0,009448989	0,007417147	0,006694532	0,017730106	0,001695031	0,002151873	0,002233099	0,002348646	0,003320484	0,001755463	0,003358373	0,002179348	0,002302898	0,000778	0,000506504	0,000723113	0,001943067	0,002145157	0,001689862	0,002802845	0,004337701	0,007146728	0,003730078	0,002673771	0,001505762
4-hydroxypyridine	0,00372516	0,003085524	0,003401058	0,005531029	0,010298127	0,00791568	0,001373196	0,002896806	0,001540273	0,008500538	0,010359682	0,004341347	0,003974789	0,003918159	0,006424948	0,002592708	0,00235266	0,002741644	0,004448948	0,006529894	0,006668651	0,007917652	0,014001954	0,009849522	0,0099924	0,005318052	0,013815456
benzyl alcohol	0,011689276	0,008542237	0,016803199	0,024253505	0,019679436	0,0305763	0,000887058	0,001240699	0,001013415	0,041242468	0,044021697	0,026925354	0,039150122	0,034758447	0,041206132	0,000263232	4,37E-05	7,94E-05	0,004641281	0,005640371	0,004541901	0,000597062	0,00034352	0,000391363	0,000710632	0,00066397	0,000776562
L-leucine	0,010978947	0,010193445	0,005288754	0,008671224	0,007184929	0,008652652	0,003932376	0,005524591	0,005098167	0,012259162	0,012303217	0,006118446	0,008001056	0,007356336	0,007432044	0,006693332	0,003806952	0,00506815	0,011718298	0,014594027	0,010119954	0,009525865	0,011736792	0,011440449	0,010649216	0,010131457	0,008160202
2-ethylhexanoic acid	0,015467719	0,011981308	0,004647928	0,006453364	0,006744275	0,008476881	0,116288704	0,139603893	0,152447099	0,272112318	0,254875786	0,035366452	0,053784027	0,044987448	0,055991008	0,159180952	0,005077157	0,005315458	0,016952492	0,017541151	0,013981722	0,018296831	0,012527433	0,014620024	0,01491458	0,013726978	0,041946172
1-octanol	0,011661734	0,011176138	0,004852426	0,007256728	0,005674143	0,008846924	0,02458497	0,033809839	0,032202998	0,047011734	0,04446007	0,012709852	0,025559384	0,019783564	0,022408742	0,015117674	0,003630282	0,003973668	0,013775336	0,015536783	0,011633187	0,008270214	0,008149158	0,007588556	0,009950605	0,007800924	0,01172561
2-ketoisocaproic acid	0,005972044	0,005049617	0,003827982	0,005612019	0,004303086	0,006420037	0,000591423	0,001633901	0,000291973	0,002295708	0,003656626	0,002538526	0,002840876	0,002472006	0,003706443	1,19E-05	1,03E-05	0	0,004077571	0,004331627	0,003780408	0,010473486	0,009640322	0,011259013	0,01138976	0,0108966	0,005552243
beta-hydroxyisovalerate	0,012807386	0,006098738	0,002603184	0,008736653	0,006519115	0,008042431	0,000863443	0,001340206	0,00067713	0,003417998	0,010810655	0,006252151	0,005187385	0,002371889	0,002744412	0,001347599	0,002363165	0,0004368	0,022785438	0,018062788	0,013688371	0,010316635	0,060841897	0,025968844	0,008729315	0,006066668	0,009560803
2-butyne-1,4-diol	0,007985487	0,007057924	0,004453967	0,006707032	0,003491947	0,007454686	0,002989595	0,005298103	0,004047956	0,010745841	0,010585691	0,005494473	0,008197719	0,006062463	0,007439403	0,004197059	0,005227179	0,004812052	0,010342715	0,011543981	0,012026747	0,01002179	0,00679414	0,009434367	0,011854203	0,00846598	0,012006093
benzoic acid	0,031404656	0,025390191	0,01087181	0,017271173	0,007476182	0,010983233	0,007280972	0,013029997	0,007577783	0,015062419	0,022911765	0,014672238	0,012588067	0,012922701	0,019018743	0,002769969	0,001404893	0,001500065	0,00612589	0,007471092	0,018188104	0,005602221	0,004407189	0,005489999	0,006204714	0,00461134	0,007675997
caprylic acid	0,009538701	0,008840241	0,004982681	0,006884135	0,005427806	0,007707139	0,014336773	0,020273252	0,020271942	0,055331558	0,046559979	0,016065142	0,023532455	0,018481402	0,022898172	0,010487901	0,003309651	0,003609142	0,011127191	0,012838313	0,013916908	0,00889467	0,009622103	0,009499893	0,011475951	0,008330635	0,011533507
ethanolamine	0,009425036	0,007462513	0,004777371	0,009395401	0,008188692	0,009577272	0,002610226	0,004272694	0,00414332	0,012059382	0,012384691	0,005871647	0,007828841	0,005604113	0,006130738	0,006537146	0,002927091	0,003449251	0,013107229	0,012456141	0,009528029	0,010462306	0,014753054	0,01334737	0,010179661	0,010815905	0,008907896
glycerol	0,009767524	0,008983638	0,00394323	0,005948897	0,005160791	0,00694548	0,003766688	0,004325677	0,004550267	0,010444114	0,010456388	0,004974174	0,007350929	0,005777832	0,007113145	0,00488349	0,004202139	0,004255525	0,012233489	0,013202885	0,010340248	0,009083927	0,008946071	0,009685421	0,010316644	0,009292002	0,009144621
1-nonanol	0,009538701	0,008840241	0,004982681	0,006693688	0,005427806	0,007707139	0,015359812	0,020273252	0,01963343	0,058661206	0,04906151	0,016954985	0,025249033	0,01982953	0,024051065	0,011252943	0,003551074	0,004269412	0,013735102	0,013774806	0,014932079	0,008323111	0,010138262	0,009428756	0,011065953	0,008938314	0,012834467
L-threonine /L-allothreonine	0,018888959	0,009887964	0,003966034	0,018731944	0,011363845	0,006323868	0,001736364	0,001942469	0,006865762	0,021529739	0,015951944	0,012539638	0,046553039	0,0080482	0,018446247	0,013388003	0,011583328	0,008871754	0,073378229	0,032696176	0,016673586	0,02382404	0,04836211	0,02159583	0,02684886	0,033550333	0,014471409
DL-isoleucine	0,00787645	0,00845174	0,00322036	0,004455239	0,003271399	0,007029758	0,008180069	0,008601599	0,006196621	0,008596338	0,011173293	0,002933192	0,01145851	0,005246097	0,005508338	0,003115462	0,001415146	0,003673661	0,010766926	0,008972768	0,008419805	0,003886372	0,002352687	0,005056999	0,006420563	0,003727101	0,009250853
nicotinic acid	0,009669745	0,008653598	0,004726813	0,007692529	0,007645939	0,010481828	0,011512184	0,015972243	0,013157442	0,011160942	0,009539375	0,00460226	0,007605926	0,00549627	0,007359318	0,011351061	0,003415814	0,003160589	0,007054043	0,008210692	0,006907364	0,007030925	0,009695921	0,00976594	0,008513467	0,007325997	0,008714107
L-proline	0,006291134	0,007132201	0,00219518	0,002504596	0,002153813	0,004940405	0,006271536	0,006043984	0,003434431	0,006267902	0,008725364	0,002178282	0,009190203	0,005017699	0,00391297	0,002181689	0,001527858	0,003118732	0,009687368	0,007901866	0,006856484	0,002567898	0,002310828	0,005155657	0,004474119	0,002705251	0,007275318
glycine	0,011678464	0,010274568	0,004000404	0,007105994	0,005431585	0,006077445	0,003207258	0,00475088	0,004021057	0,014725665	0,016117305	0,007548712	0,011998793	0,008429209	0,007249064	0,008829577	0,005478202	0,007007136	0,018923596	0,022950855	0,01238806	0,011295895	0,016249058	0,015937482	0,011981939	0,011090277	0,011456096
succinic acid	0,014169974	0,012129402	0,002745859	0,004368409	0,005966787	0,006600845	0,019694049	0,041930059	0,021347574	0,013153953	0,0144909	0,007917675	0,010944172	0,009761461	0,011182756	0,00232694	0,001883519	0,001939162	0,00756768	0,008779721	0,008926573	0,004057097	0,005635655	0,007056091	0,005415836	0,004200668	0,008816203
picolonic acid	0,008540064	0,007207812	0,004264297	0,006939519	0,005753494	0,008256232	0,003460361	0,004348543	0,00441303	0,010893476	0,01012424	0,004776476	0,006410702	0,00489873	0,007494063	0,004436643	0,003452609	0,003711095	0,010350514	0,011629168	0,00985858	0,008608156	0,010149702	0,009574292	0,011224756	0,008128337	0,013136058
glyceric acid	0,008846347	0,006534131	0,003439602	0,005816227	0,014792158	0,020323808	0,017090628	0,172639944	0,018264832	0,010425197	0,015714268	0,006727053	0,011448601	0,009192771	0,011547004	0,002572113	0,002481465	0,000657358	0,00156159	0,003154204	0,00263659	0,001516563	0,002741304	0,003182297	0,002134331	0,001590805	0,011400658
porphiryn	0,008560541	0,007560165	0,004509695	0,007688409	0,005574372	0,008624739	0,003160701	0,004142789	0,003987605	0,013010791	0,011498064	0,005690127	0,006752865	0,005397092	0,009101565	0,004725811	0,004105906	0,004143521	0,011987067	0,013080559	0,01148986	0,012839624	0,009653733	0,010606462	0,014486122	0,010774352	0,016322403
nonanoic acid/1 decanol	0,009456606	0,008760586	0,004631217	0,006267776	0,005520433	0,008742182	0,011414904	0,017791491	0,016125451	0,056192173	0,053164266	0,014593261	0,02328869	0,017062738	0,021948541	0,007618408	0,004227409	0,004266213	0,011071134	0,014173162	0,024517933	0,008276164	0,010221437	0,008529777	0,011868144	0,007760036	0,010786891
L-homoserine	0,007174247	0,008027377	0,004287338	0,00474513	0,004057462	0,00745545	0,004956453	0,002339102	0,004199787	0,008428464	0,01052774	0,003851096	0,00468973	0,005624789	0,004612929	0,003888574	0,002504229	0,003676673	0,006686172	0,009476333	0,007676869	0,005962575	0,005564525	0,008024864	6,74E-05	0,005024007	0,008555571
L-serine	0,00552467	0,008138589	0,00436315	0,00191507	0,002831105	0,007549323	0,006370956	0,008408419	0,003463617	0,00697124	0,010388629	0,003161067	0,002973411	0,006257188	0,003534824	0,003352889	0,001914117	0,003932372	0,00320034	0,008583443	0,006652686	0,003784568	0,003553539	0,007889676	0,004555432	0,002715926	0,006568957
1-decanol/(nonanoic acid )	0,008215964	0,008678197	0,004546305	0,006759216	0,00583254	0,007783658	0,011804766	0,016102088	#VALUE!	0,052903882	0,048072774	0,012122874	0,021464846	0,015984825	0,020823469	0,007284784	0,003899293	0,004138396	0,008819417	0,013898221	0,021937741	0,00704846	0,009651304	0,008395684	0,011783488	0,006855555	0,010366193
L-threonine	0,007131833	0,009650603	0,004474751	0,002491513	0,003391457	0,007311158	0,004800339	0,006723956	0,003185215	0,008268876	0,011421921	0,004231769	0,003129236	0,006662535	0,004008539	0,004324045	0,002502601	0,00426233	0,003684223	0,010901099	0,007232929	0,004827646	0,006935986	0,011578397	0,005423348	0,003821767	0,006697081
nicotinamide	0,015199208	0,008696751	0,003387503	0,016096153	0,009608038	0,007782022	0,002243931	0,00201305	0,004108933	0,007462781	0,01415912	0,005866621	0,020068289	0,00458487	0,007718546	0,006486255	0,005070916	0,003830165	0,029254873	0,008746734	0,007336206	0,014588798	0,024088539	0,017198842	0,015760495	0,017872051	0,009067633
L-methionine	0,014183049	0,007350582	0,004228931	0,036873435	0,010427437	0,006133803	0,002351096	0,004861949	0,009351027	0,01704437	0,012604857	0,008708002	0,115087533	0,010128555	0,023032669	0,005906528	0,006132794	0,006836321	0,164324049	0,012047541	0,007771771	0,021475063	0,028189282	0,013340062	0,026467206	0,028890306	0,011504258
aspartic acid	0,018467371	0,009344197	0,004030475	0,022676969	0,012836228	0,006131653	0,004637871	0,005638086	0,010194156	0,005644207	0,004508198	0,004070732	0,041735706	0,005225704	0,007948226	0,005637076	0,004975442	0,001869342	0,072705163	0,023332866	0,011345955	0,01042584	0,013865826	0,009276092	0,016118741	0,015062055	0,010042073
Beta-alanine	0,026823689	0,002437233	0,000764274	0,000276879	0,016442562	0,021331242	0,001522118	0,002977726	0,002593687	0,010106586	0,008475155	0,000362665	0,006552311	0,002393753	0,00789499	0,002225104	0,002603129	0,002343085	0,011080544	0,000485178	0,007224091	0,006988162	0,013616192	0,008714317	0,009331315	0,008552396	0,000360562
capric acid	0,005811858	0,008354374	0,003474245	0,000834701	0,002481706	0,00800072	0,003840821	0,005844521	0,00123937	0,008827586	0,012038101	0,00358415	6,24E-05	0,006964149	0,003207596	0,004985261	0,002559545	0,005019795	0,000847448	0,008882267	0,006993821	0,004310719	0,007614502	0,009954621	0,004065842	0,003158291	0,006150074
L-cysteine	0,00699343	0,004586191	0,004980426	0,009868	0,00523607	0,01247637	0,001330468	0,002572209	0,002003181	0,005128142	0,004360001	0,002536975	0,002920847	0,001467061	0,005372793	0,001244296	0,001294597	0,001088757	0,004218246	0,003855149	0,004540032	0,006719893	0,007355178	0,007959413	0,007882166	0,006172463	0,006526812
trans-4-hydroxy-L-proline	0,0184915	0,007543007	0,00319958	0,026991563	0,01288517	0,005021445	0,00242001	0,002751144	0,008837865	0,008502966	0,006162862	0,004565335	0,068320033	0,005285549	0,005424642	0,010794532	0,005845635	0,002772149	0,130297249	0,029404144	0,015211792	0,008362634	0,003985954	0,015357693	0,012724496	0,017461847	0,011109682
D-malic acid	0,011300097	0,009811814	0,001538894	0,003589223	0,002748328	0,004394051	0,003507006	0,005628725	0,003203245	0,005839131	0,005650165	0,00398265	0,004183339	0,00706699	0,005343251	0,002293584	0,001155823	0,002064076	0,007287539	0,011022103	0,007630188	0,005990837	0,005486192	0,009171981	0,006896712	0,004996066	0,014760348
D-threitol	0,033366188	0,028497464	0,003373048	0,003018811	0,010417738	0,012918999	0,050986104	0,125373484	0,05302899	0,007872605	0,009924721	0,005259243	0,007472907	0,007603443	0,008708381	0,000610486	0,000511659	0,000877417	0,001512702	0,002439474	0,001654635	0,001993651	0,003542375	0,003914912	0,002087754	0,001778134	0,005957679
adipic acid	0,010535525	0,008891747	0,003296397	0,006800009	0,005578451	0,005356724	0,01778063	0,007497946	0,008683224	0,005131261	0,003147905	0,001340341	0,001774625	0,009898375	0,002011506	0,001884571	0,00083674	0,00158448	0,002520215	0,005073289	0,003453244	0,001367592	0,002223411	0,00309995	0,002290035	0,002101116	0,00328459
L-pyroglutamic acid	0,010538953	0,009496111	0,004165481	0,006780102	0,005491529	0,007258817	0,004199647	0,005340468	0,005123722	0,006590858	0,007287541	0,004005366	0,005875423	0,004156746	0,005347916	0,006140767	0,004718135	0,001859452	0,013896991	0,01515004	0,010858988	0,006083017	0,009494295	0,010698435	0,006923903	0,00631095	0,011109895
Phenylalanine	0,013710081	0,008695387	0,003898818	0,016870005	0,010068144	0,006529165	0,003863308	0,003514472	0,007357432	0,007624744	0,008080698	0,004609978	0,03122048	0,005048806	0,006163225	0,00658944	0,004282632	0,002337068	0,050324029	0,019690881	0,010875506	0,009680641	0,012699039	0,011568943	0,012290921	0,014296615	0,010187862
cinnamic acid	0,018609664	0,009590927	0,004486274	0,025959904	0,015539746	0,007987131	0,004062776	0,001190771	0,011084562	0,00406134	0,002193128	0,003432423	0,024493835	0,002816608	0,0057	0,004563214	0,001916133	0,001765629	0,04108247	0,01776203	0,010983046	0,009471467	0,004960769	0,007133433	0,011389222	0,014178318	0,008970854
threonic acid	0,006766589	0,006207419	0,003170048	0,004925483	0,013656396	0,01968077	0,024266603	0,178098072	0,027345606	0,009893205	0,015216606	0,006420788	0,013519943	0,010242095	0,011852202	0,005954683	0,001557205	0,000291606	0,002038425	0,0040105	0,003593668	0,000954126	0,000718153	0,000831354	0,001263023	0,001149568	0,01229699
L-glutamine	0,011386702	0,007441651	0,005137156	0,007950667	0,008149863	0,007625706	0,002054177	0,002364127	0,002570398	0,002792995	0,004765347	0,002361838	0,002158735	0,002453943	0,003097086	0,006366725	0,005209238	0,000928868	0,009755384	0,012379354	0,00726474	0,006446057	0,019589448	0,017784502	0,006962585	0,005736443	0,009796665
hexadecene	0,005011104	0,00439036	0,004795401	0,002679272	0,004116231	0,008465531	0,00315641	0,006152579	0,00517753	0,012714009	0,007109506	0,009211748	0,012662629	0,002831199	0,003575197	0,009607991	0,004453206	0,005559652	0,010931646	0,012983661	0,005466665	0,005639567	0,011175315	0,011551212	0,00902346	0,009368362	0,01521844
L-ornithine	0,00746108	0,009603956	0,004250245	0,002589991	0,004134518	0,0055232	0,004438134	0,005523994	0,003313945	0,008471719	0,010128296	0,003829989	0,003044416	0,006454679	0,00411951	0,00467315	0,002791391	0,005106655	0,001877287	0,011719845	0,005858968	0,004146359	0,008256289	0,008466205	0,005078879	0,003734617	0,005843172
L-glutamic acid	0,005940336	0,00576457	0,00259222	0,003095288	0,002983932	0,004066437	0,001874982	0,002683442	0,001810774	0,007441217	0,009061474	0,004060844	0,00436043	0,005724972	0,004831667	0,003958202	0,002520919	0,003641891	0,006715592	0,013418377	0,008145943	0,005898285	0,010148179	0,010434252	0,006731567	0,006127489	0,006232168
triethanolamine	0,242360916	0,008783175	0,00344827	0,009635906	0,005925128	0,009252546	0,002408084	0,004164745	0,004765278	0,015866139	0,011060033	0,006144228	0,189234646	0,006699175	0,008459883	0,005119931	0,005851333	0,004115053	0,324870857	0,009917375	0,020457212	0,012245133	0,018589404	0,010786562	0,009945404	0,061234601	0,017564139
vanillin	0,005073063	0,004721109	0,004892778	0,006551363	0,001602892	0,006782766	0,002266594	0,002966637	0,001753625	0,009861635	0,011054325	0,004131411	0,003413213	0,004685456	0,007638942	0,002672923	0,003077374	0,004003404	0,005631784	0,009484395	0,009761692	0,006596948	0,00857897	0,010358153	0,010420765	0,006348338	0,013642111
lauric acid	0,012557052	0,010302221	0,004622685	0,006958319	0,006104546	0,008148009	0,01874325	0,024442295	0,031146082	0,056566748	0,047364599	0,016569108	0,024562268	0,019610073	0,027774343	0,003915344	0,003498204	0,003199312	0,008717612	0,015426887	0,00994461	0,007009279	0,007613563	0,007257369	0,008435471	0,007269894	0,009509035
L-asparagine	0,009940526	0,009885563	0,004159533	0,005171018	0,005179781	0,006463687	0,004173983	0,005411442	0,003862713	0,007543513	0,010406808	0,005181022	0,005504759	0,008586962	0,004340763	0,006506304	0,00365613	0,005530784	0,008854504	0,017281647	0,007481768	0,003904514	0,015672302	0,011921394	0,00548599	0,004074153	0,007509532
putrescine	0,005560458	0,009841802	0,005575595	0,012370044	0,008912665	0,009525303	0,004637536	0,007711262	0,004703568	0,008860494	0,013507074	0,005268039	0,003856785	0,008793507	0,003052374	0,011451621	0,00088752	0,005470593	0,004895416	0,01513612	0,007357289	0,003509355	0,00625475	0,012154217	0,004514048	0,004524562	0,005059588
glycerol 1-phosphate	0,007162609	0,005222671	0,001095345	0,001588185	0,001790786	0,002722508	0,000956414	0,002092932	0,001175306	0,002321735	0,004906719	0,002157391	0,003403495	0,002590393	0,002701095	0,000585479	0,000148123	0,000350429	0,009481965	0,017544038	0,009146514	0,001888627	0,010938572	0,013416262	0,004077558	0,003497458	0,003419866
O-phosphocolamine	0,007498406	0,006210406	0,001695387	0,003089351	0,001824934	0,002017881	0,000220405	0,000803915	0,00049699	0,007482634	0,008313239	0,008849823	0,006530644	0,004281014	0,008926766	0,001944537	0,001838418	#VALUE!	0,068098601	0,077613493	0,035312656	0,009863614	0,033122893	0,021326126	0,005692476	0,006865862	0,019502328
hypoxanthine	0,005384957	0,004924881	0,000880883	0,001462483	0,001331649	0,001736434	0,00100016	0,003820834	0,001340452	0,005556895	0,006228488	0,002296748	0,004239079	0,002794751	0,006250086	0,001270946	0,001116858	0,000980905	0,011146138	0,016563508	0,01142648	0,003811993	0,007567049	0,010062204	0,00447507	0,003659324	0,005357307
citric acid	0,012692254	0,009962903	0,002316978	0,003832009	0,003010343	0,004325281	0,003015666	0,007217108	0,002636353	0,00635428	0,009649291	0,004327606	0,006128198	0,005111479	0,006576855	0,001126498	0,000640617	0,000696379	0,00413513	0,00553869	0,005336851	0,004057811	0,008558607	0,00934581	0,004413807	0,004177858	0,004873312
alpha-D-glucosamine phosphate	0,002356118	0,004581455	0,007012707	0,007340179	0,00635467	0,01645039	0,005936597	0,016788492	0,002548804	0,006077397	0,00469132	0,001731572	0,002417914	0,002656876	0,010063567	0,003591696	0,000293363	0,002132684	0,000898855	0,002320948	0,019985767	0,005618024	0,002824164	0,00356387	0,003682722	0,005339496	0,022637576
citrulline	0,005153888	0,009725487	0,004766356	0,00476346	0,00444461	0,005965891	0,005862877	0,008317884	0,005318437	0,008532297	0,007360144	0,003072613	0,003018081	0,006550824	0,00524645	0,005282331	0,001614411	0,005107961	0,005364852	0,015594251	0,01016286	0,003914387	0,004267352	0,006209091	0,005769777	0,003647299	0,006829427
4-aminobenzoic acid	0,009916375	0,011306232	0,004860904	0,006157528	0,005824436	0,006748824	0,005490983	0,006444788	0,006245015	0,010732527	0,011591404	0,00526956	0,008369202	0,007899232	0,006797346	0,007548803	0,005877012	0,005478531	0,012951709	0,016872794	0,008526337	0,007408462	0,008756186	0,008004296	0,009235211	0,007916045	0,009345734
myristic acid	0,006499863	0,014702565	0,001995074	0,02028557	0,008692243	0,005271146	0,004603215	0,005409472	0,019136175	0,03460488	0,028909796	0,012796873	0,012806858	0,01090558	0,041479344	0,011337822	0,004407118	0,006272469	0,008954541	0,018472951	0,022465167	0,021997619	0,020041208	0,035205948	0,026307344	0,01026657	0,013782997
methyl-beta-D-galactopyranoside Results	0,000384863	0,00091724	0,000439827	0,005172079	0,000654337	0,021071529	0,0027825	0,006910343	0,000856837	0,006535618	6,55E-05	0,000126866	0,000123758	0,000396995	0,00755564	0,001836146	0,000294565	0,000158354	0,000282488	0,001772369	0,036798142	0,003506813	1,40E-05	0,000119606	0,003717169	0,003358606	0,025132328
L-lysine	0,015835937	0,004834124	0,002961118	0,031600021	0,010189079	0,010096499	0,002308835	0,001650302	0,005082061	0,029118553	0,043628454	0,016221529	0,03878466	0,005930019	0,013627171	0,008750494	0,013654488	0,008623577	0,039149155	0,011503991	0,012672279	0,046880361	0,053397414	0,018341568	0,036162728	0,053046953	0,015990075
L-methionine sulfoxide	0,013052299	0,026238556	0,01045924	0,009107305	0,010399473	0,012967339	0,012407777	0,015054213	0,012215845	0,008701013	0,007401572	0,003355495	0,003954617	0,007878534	0,004959785	0,006571731	0,002844554	0,006064414	0,009285317	0,023789442	0,011898549	0,003208875	0,00243331	0,003919171	0,004386607	0,003196217	0,007046207
9H-purine-6-amine /adenine	0,012828946	0,009108452	0,00476555	0,006487453	0,005860585	0,009272052	0,002358197	0,006699289	0,00592026	0,025995981	0,030664594	0,015328493	0,022539512	0,003576459	0,018073273	0,016104115	0,014201397	0,009012732	0,040323531	0,032061473	0,028182888	0,028083636	0,027661277	0,024898082	0,028614429	0,028223734	0,02556815
fructose	0,056047968	0,049817534	0,009864406	0,016039787	0,014065326	0,017430076	0,071371306	0,105738443	0,068637047	0,008120854	0,011450149	0,00677244	0,010623688	0,002290393	0,006388867	0,035418758	0,00849786	0,003134549	0,018867133	0,024209123	0,010852195	0,005487127	0,007032529	0,005655174	0,006420551	0,005747078	0,013400977
tagatose	0,012578196	0,0213453	0,011484352	0,017878887	0,022492749	0,032194347	0,048730203	0,132146313	0,05966141	0,009194727	0,011509791	0,006898228	0,011208577	0,00838549	0,007348813	0,000209495	4,26E-05	0,002731004	1,17E-05	-0,001558069	0,000674079	0,006856731	0,016919692	0,014857597	0,007633138	0,007303437	0,002193112
tyrosine	0,019754473	0,006496846	0,003569506	0,021532976	0,00882063	0,010231468	0,002175689	0,002094548	0,003937577	0,023186206	0,03589903	0,013218955	0,032587145	0,005717111	0,013226039	0,005114866	0,01569471	0,008847085	0,030758766	0,010618471	0,007779235	0,050477779	0,152696471	0,037435236	0,040123475	0,053549458	0,014059402
pyridoxine	0,010293053	0,009958312	0,003690346	0,005150984	0,004061936	0,006009968	0,003388398	0,004014221	0,003936964	0,010623802	0,010439798	0,00492529	0,007637006	0,006137826	0,007101134	0,005945565	0,00487896	0,004877631	0,015118164	0,016088049	0,01166906	0,011468033	0,014049986	0,01660319	0,013236819	0,010695821	0,012149938
gluconic acid lactone	0,000126562	0,001004798	0,001429788	0,005997515	0,022239591	0,018819115	0,004463226	0,009399534	0,001181456	0,007181367	0,016013173	0,004427549	0,005693387	0,005559202	0,007794661	0,002965729	0,000478455	0,00607146	0,000337427	0,002875988	0,036322095	0,004289965	0,017426191	0,014873917	0,004937467	0,004028619	0,026944498
D-allose /talose	0,011527525	0,006177471	0,002528594	0,004159899	0,003070414	0,004059566	0,004270324	0,005405231	0,005086968	0,008260157	0,011256489	0,00568606	0,009625615	0,007050783	0,006656017	0,011525352	0,008628893	0,003963846	0,029308014	0,031595862	0,019093232	0,00583378	0,01738155	0,016514945	0,006818486	0,005529807	0,018423225
L-gulonic acid gamma-lactone	0,010787215	0,011008017	0,002687824	0,002181448	0,002722293	0,003093978	0,004091549	0,005365207	0,004402924	0,020967269	0,025834196	0,008312038	0,005336796	0,012164434	0,010500044	0,030013703	0,016143289	0,007961817	0,061799234	0,080020059	0,033360199	0,012177029	0,0368859	0,007363814	0,018539059	0,009219304	0,036725179
L-histidine	0,006635115	0,012033468	0,004142344	0,002205851	0,00415406	0,005052621	0,003216383	0,005524823	0,002988023	0,006714914	0,006133845	0,003135519	0,002871308	0,007469981	0,004012422	0,005432363	0,000540229	0,004916125	0,006997185	0,016645241	0,00855005	0,001919513	0,001652611	0,009947329	0,003683972	0,001894006	0,004451614
galactosamine	0,006129992	0,00478405	0,000265053	0,000514095	0,001638217	0,00217936	0,00939677	0,026950392	0,009832534	0,008641261	0,010065974	0,006531252	0,009850596	0,008328398	0,010143395	0,001456336	0,001404991	0,001067628	0,002049801	0,002041371	0,009202628	0,001731498	0,00171017	0,004553344	0,001366622	0,001398617	0,008922353
D-sorbitol	0,012204243	0,012693072	0,002499205	0,003370013	0,001517095	0,00202477	0,001021005	0,001471477	0,000590847	0,004859264	0,006701901	0,003550481	0,004706886	0,004265761	0,003984149	0,000403868	0,000417133	0,001623773	0,063959824	0,079094508	0,048820268	0,005149722	0,004059732	0,004284045	0,006371327	0,005118265	0,025386469
Galactitol	0,010691604	0,008012419	0,0068976	0,010094902	0,00896642	0,010431202	0,002098369	0,003765779	0,004428692	0,011865143	0,017895735	0,007442953	0,011098437	0,007955132	0,00679676	0,004073579	0,002716967	0,007088792	0,011300049	0,00931291	0,00680238	0,009919387	0,016587377	0,012332285	0,011468209	0,009774257	0,008158606
1-hexadecanol	0,006804985	0,008972599	0,002320455	0,006590167	0,006169024	0,009021362	0,007441127	0,011415724	0,00943523	0,046273873	0,052117844	0,011014063	0,031346085	0,014328353	0,030869222	0,005886499	0,004210068	0,004632668	0,011290274	0,013482269	0,015624204	0,010982904	0,015792763	0,012838657	0,019488035	0,007616803	0,016116718
pantothenic acid	0,01084795	0,010320125	0,008801113	0,012547398	0,009874767	0,012502341	0,003900313	0,008094838	0,003982126	0,014081387	0,019118835	0,008083761	0,012074224	0,009737438	0,007790481	0,00246158	0,00209853	0,007012663	0,007954205	0,008910037	0,006775965	0,009370411	0,021233188	0,02169552	0,011073255	0,009843598	0,00634616
D-glucosaminic acid	0,006185987	0,006631605	0,000781203	0,033518051	0,001170211	0,000950158	0,002102914	0,001456122	0,002053088	0,009101419	0,015160468	0,005377803	0,24895395	0,012155297	0,005934043	0,009252206	0,006167558	0,006095967	0,118901108	0,139926542	0,087809766	0,00555621	0,012865359	0,009901279	0,152833034	0,168811928	0,067070266
galactonic acid	0,004399498	0,004439876	0,028979851	0,040871637	0,030660744	0,034055065	0,001025479	0,003356511	0,00093993	0,01733279	0,02817213	0,011668211	0,01565785	0,012534214	0,005850996	0,000288979	0,000173168	0,009509102	0,004808281	0,006283809	0,003401559	0,009736446	0,022466986	0,017568375	0,010947714	0,011178524	0,002630271
xanthine	0,005961803	0,005021941	0,000761121	0,001641396	0,001893293	0,002492089	0,00229211	0,006501736	0,00254296	0,002638697	0,005354336	0,002431138	0,003767676	0,003462154	0,004449921	0,000144823	0,006848236	0,000158673	0,01152281	0,017672431	0,01095731	0,004719973	0,009345014	0,00966513	0,004140482	0,004221137	0,004295347
palmitic acid	0,004992912	0,005389749	0,001609695	0,00461266	0,007090803	0,003953575	0,002642456	0,009309849	0,004360357	0,033422399	0,02114863	0,010275178	0,010329347	0,01463169	0,013242906	0,010728562	0,009572998	0,009143858	0,010285764	0,012873014	0,015898964	0,009825712	0,032887424	0,011412765	0,011562268	0,01012716	0,023008308
N-acetyl-D-glucosamine	0,009920367	0,009616753	0,00395214	0,006352538	0,00528195	0,007038564	0,003656223	0,004481826	0,004234416	0,009603466	0,009963736	0,004494503	0,006955944	0,005703085	0,006649917	0,005027142	0,003951365	0,004350775	0,01116506	0,012767308	0,009554331	0,007973152	0,010240627	0,010778125	0,009420144	0,008147647	0,008954454
myo-inositol	0,010028242	0,00961125	0,003981217	0,006318353	0,005342792	0,007003297	0,003673476	0,004500398	0,004209113	0,00975047	0,010060066	0,004543634	0,007075883	0,00569113	0,006706485	0,005124905	0,004005102	0,004381771	0,01136361	0,013039448	0,009715694	0,008068851	0,009838669	0,010226639	0,009482057	0,008247583	0,009089447
heptadecanoic acid	0,006789981	0,006920475	0,005030014	0,005358949	0,005237015	0,00626385	0,006191816	0,008735222	0,006749702	0,024328854	0,02397173	0,010418292	0,014460085	0,016247849	0,017051619	0,00466801	0,003781095	0,004040243	0,007480844	0,009103003	0,009949714	0,008470512	0,015399676	0,01077098	0,009579471	0,005763676	0,009927139
L-kynurenine	0,012231165	0,013451085	0,003933525	0,004150419	0,005253702	0,011070171	0,002575466	0,003653985	0,00296681	0,01360326	0,012529494	0,009119821	0,007253895	0,007710377	0,011389261	0,002814909	0,002177546	0,004892607	0,010351625	0,014691294	0,010552296	0,013446238	0,024541821	0,0228899	0,02320706	0,012807835	0,006744697
linoleic acid	0,009004467	0,008579243	0,003816876	0,006780884	0,007285764	0,01025698	0,006394313	0,007749358	0,006008298	0,011634221	0,014975405	0,005523437	0,009820316	0,008020455	0,009744867	0,003902495	0,003118888	0,005761257	0,003459873	0,004131056	0,003989064	0,004054483	0,008311899	0,007534243	0,005613045	0,004153324	0,003226303
5-hydroxyindole-3-acetic acid	0,010196249	0,011090158	0,007922673	0,012826766	0,008996337	0,016612107	0,000698548	0,00063428	9,67E-05	0,001724072	0,003481394	0,001058036	0,000966087	0,001596777	0,00177029	0,00043632	6,55E-05	0,00066964	0,006214113	0,007734482	0,004932226	0,010561136	0,009605271	0,010632891	0,010921344	0,010416449	0,007828944
L-tryptophan	0,006838386	0,006953963	0,003427188	0,005247812	0,004384581	0,005992734	0,003579265	0,004739761	0,003831399	0,012974668	0,012885717	0,005327427	0,008386231	0,007663752	0,007466884	0,004871838	0,002613951	0,007042043	0,006435136	0,008058468	0,006605057	0,007550362	0,011915188	0,01262516	0,009911651	0,007770947	0,005909535
elaidic acid /oleic acid	0,006007116	0,005421899	0,001476542	0,00283009	0,003437202	0,003012767	0,002933121	0,005559423	0,003376338	0,018966684	0,02414232	0,011604515	0,01863804	0,018408402	0,020981747	0,004702349	0,003630307	0,005444442	0,007179027	0,009336413	0,008783763	0,009701264	0,015378659	0,009553704	0,012021629	0,010434221	0,010018847
trans-13-octadecenoic acid	0,007740251	0,004625778	0,001488091	0,002567406	0,002764145	0,005614092	0,002446089	0,004424169	0,003825495	0,01081698	0,017891736	0,00744709	0,012046139	0,011731087	0,011037973	0,003409224	0,004189806	0,004529478	0,00856548	0,008138124	0,013241346	0,014168512	0,012876548	0,009967461	0,013188529	0,014545255	0,01468981
stearic acid	0,004945449	0,00501125	0,001670359	0,003970623	0,007225848	0,003822401	0,002660431	0,008875357	0,003551923	0,02895469	0,017269848	0,009628802	0,010165511	0,015353606	0,011880446	0,010434659	0,009671314	0,008774776	0,009734063	0,012219347	0,015589499	0,008823835	0,031439186	0,010042819	0,010220328	0,009350513	0,022267995
D-sphingosine	0,000380219	0,000564101	0,000308434	0,001419005	0,000101734	0,032108132	0,006023127	0,023505763	0,001102497	0,003305079	4,22E-05	6,24E-05	5,66E-05	0,000201283	0,006571691	0,003229147	7,07E-05	9,30E-05	4,44E-05	0,000387062	0,032874617	0,002185804	8,98E-05	0,000428722	0,00225798	0,002331161	0,031724933
arachidic acid	0,005382679	0,005595422	0,002391895	0,004293926	0,006525873	0,004666804	0,003266303	0,008431684	0,002906506	0,016935442	0,008771656	0,006182844	0,007043847	0,01001125	0,011159986	0,004903237	0,004495923	0,004916086	0,00564508	0,007807049	0,008681307	0,006307536	0,017935711	0,007338013	0,006683634	0,005709812	0,014727216
serotonin	0,008074307	0,007060582	0,004559007	0,009332393	0,011189718	0,015337469	0,000811623	0,001831711	0,000605705	0,012525812	0,005961933	0,003035585	0,002536856	0,002233862	0,004290847	7,32E-05	#VALUE!	#VALUE!	0,002956216	0,007088595	0,002409459	0,020522341	0,020297364	0,023243979	0,021077	0,019238938	0,019569366
cellobiose	0,011998618	0,013829837	0,00371759	0,009027897	0,004874033	0,008235543	0,001553106	0,003034675	0,000400465	0,010954205	0,003443537	0,002846579	0,002146472	0,002509988	0,010012593	0,003601423	0,005757481	0,002135279	0,001062721	0,002657276	0,029067056	0,006503654	0,004853824	0,007634702	0,007953617	0,006706213	0,029353125
D-(+) trehalose /maltose	0,010059591	0,008828546	0,003031145	0,005233132	0,004685955	0,005839229	0,002830747	0,003424882	0,002976396	0,010526873	0,012410817	0,004858846	0,007731814	0,006317026	0,006255476	0,006327134	0,005370592	0,004556928	0,009589836	0,012460348	0,009545453	0,007714609	0,013005311	0,01094982	0,009169033	0,008116028	0,012497127
lactitol	0,013173407	0,023717747	0,005365863	0,007843084	0,006410362	0,017530092	0,002615877	0,005232306	0,002794628	0,005697421	0,004137297	0,001808111	0,002590438	0,00204457	0,006209781	0,00184868	0,001259464	0,001897936	0,000812108	0,00307447	0,009079704	0,006499234	0,003957305	0,007051887	0,007180577	0,005659028	0,008993649
1-stearoyl-rac-glycerol / 1-monostearin	0,000369124	0,000294814	2,49E-05	1,24E-05	8,33E-05	7,70E-05	9,25E-05	0,00011909	2,81E-05	0,015794334	0,006664797	0,000721733	0,002501446	0,006024102	0,009870285	0,073782745	0,004339619	0,005856946	0,007016919	0,006020932	0,011432356	0,692787266	0,033666727	0,014728373	0,911535573	0,71951361	0,019668257
beta-gentiobiose	0,008436779	0,008203855	0,001236994	0,002164406	0,001624139	0,00353714	0,002609786	0,003593308	0,002673861	0,006659145	0,004227967	0,002157867	0,003412321	0,002950519	0,011261552	0,007103942	0,005412542	0,001587846	0,013427951	0,017975209	0,011082788	0,00762791	0,000845332	0,007374856	0,010477322	0,007588017	0,012752445
isomaltose	0,010110156	0,008491349	0,001369269	0,002709994	0,001970607	0,001579774	0,002785952	0,004330903	0,002686035	0,008741533	0,008757848	0,005704642	0,007445609	0,005772607	0,005843325	0,015184882	0,010455113	0,00372395	0,022735183	0,033617503	0,022665844	0,003891615	0,002703909	0,002531005	0,005280548	0,004176839	0,029339624
adenosine 3,5-cyclic monophosp	0,00573341	0,008232531	0,002807474	0,002680625	0,00546978	0,00693944	0,050757645	0,02539641	0,017230564	0,003962794	0,003640224	0,001209918	0,001943133	0,004634632	0,004792472	0,024973959	0,000617941	0,00164681	0,000781806	0,003921815	0,001955067	0,002369279	0,004238581	0,003647069	0,004092758	0,002345203	0,005552268
L-(+) lactic acid	0,002003402	0,031036001	0,008653445	0,022664153	0,000236706	0,00199199	0,00492783	0,005291283	0,001077439	0,008158342	0,020484775	0,03005149	0,015685702	0,039771301	0,073977833	0,00210074	0,01970693	0,031918645	0,021485096	0,007365121	0,00892464	0,002499587	0,028886887	0,051802788	0,0032825	0,03055401	0,029130995
urea	0,025547175	0,013937841	0,007191073	0,011903237	0,000288602	0,010096549	0,008539742	0,00566026	0,005263245	0,012123006	0,018807391	0,006166155	0,007658634	0,01901131	0,007575477	0,004441198	0,01130842	0,006005685	0,01665216	0,018945308	0,012495704	0,004270601	0,025651617	0,012663544	0,004706616	0,02224224	0,014115521
phosphoric acid	0,009740688	0,010203299	0,004541743	0,006871314	0,005813995	0,005213421	0,004053093	0,003992224	0,005376437	0,009472624	0,007766441	0,003927733	0,005839758	0,005090175	0,006225786	0,005108628	0,003325006	0,004086458	0,007303611	0,01193244	0,008809271	0,008894193	0,008201317	0,009111108	0,007404142	0,0054248	0,007406812
D-glucose	0,009559967	0,011482992	0,005559735	0,006133142	0,006070469	0,005607983	0,004562806	0,005154179	0,005727624	0,009022314	0,008583922	0,005581418	0,008871288	0,007458538	0,006128585	0,006005362	0,004489628	0,005502209	0,011181248	0,01321093	0,010871902	0,009500988	0,010235913	0,012717696	0,011111076	0,007576341	0,008401023
